# Supplementary material
Source: PubMed Central journal article supplement (PMC10449378)
Supplement: NIHMS1894170-supplement-1.pdf [file NIHMS1894170-supplement-1.pdf]

**Chem, volume 9**

**Supplemental information**

## **Iron-Mediated Modular Decarboxylative Cross-Nucleophile Coupling**

**Grace A. Lutovsky, Samuel N. Gockel, Mark W. Bundesmann,  
Scott W. Bagley, and Tehshik P. Yoon**

## Table of Contents:

|                                                                              |     |
|------------------------------------------------------------------------------|-----|
| A. General information .....                                                 | S3  |
| B. Select optimization results .....                                         | S4  |
| Optimization of C–C bond formation with (hetero)aryl nucleophiles .....      | S4  |
| Optimization of C–O bond formation with alcohol nucleophiles .....           | S14 |
| Optimization of C–N bond formation with sulfonamide nucleophiles .....       | S18 |
| Single set of conditions across three nucleophile families .....             | S19 |
| Reaction conducted under air .....                                           | S20 |
| Reaction sparged with N <sub>2</sub> .....                                   | S20 |
| Reaction time course .....                                                   | S21 |
| Comparison to Cu(II) conditions .....                                        | S22 |
| Mechanistic investigation into the role of iron(III) .....                   | S24 |
| Mechanistic comparison to CuCl <sub>2</sub> .....                            | S27 |
| Optimization of C–N bond formation with alkyl amines .....                   | S28 |
| C. Additional isolated substrate combinations .....                          | S31 |
| D. Substrate limitations .....                                               | S32 |
| E. Photo of laboratory set up .....                                          | S34 |
| F. Analysis of alkyl building blocks available from commercial vendors ..... | S35 |
| G. Evidence for decarboxylative triflation .....                             | S36 |
| H. UV-vis experiments .....                                                  | S37 |
| I. Substrate preparation .....                                               | S40 |
| J. Experimental procedures, isolation, and characterization .....            | S41 |
| K. References .....                                                          | S71 |
| L. Spectral data .....                                                       | S74 |

## Supplemental Experimental Procedures

### A. General Information

Dichloromethane, tetrahydrofuran, diethyl ether, toluene, and acetonitrile were dried by elution through alumina as described by Grubbs.<sup>1</sup> Cu(OTf)<sub>2</sub> was purchased from Oakwood Chemical and stored in a glovebox. FeCl<sub>3</sub> was purchased from Millipore-Sigma and stored in a glovebox. Fe(OTf)<sub>3</sub> was purchased from Ambeed Inc. and stored in a glovebox. 2-phenylethanol was distilled under atmospheric pressure and stored over 3 Å molecular sieves overnight prior to use. Pyridine was distilled over CaH<sub>2</sub>. All other chemicals were purchased from commercial suppliers and used as received unless otherwise stated. 40 W PR160L 427 nm LEDs from Kessil Lights were used as light sources. Flash chromatography was performed with Sigma Aldrich 60 Å silica gel (230–400 mesh) and thin layer chromatography (TLC) was performed utilizing pre-coated silica gel F254 plates from SiliCycle Inc. containing a fluorescent indicator. Visualization of plates were accomplished with 254 nm UV lamp or staining with *p*-anisaldehyde or KMnO<sub>4</sub>. Automated flash chromatography was performed with the use of a Biotage Selekt instrument using Biotage branded columns. All NMR spectra were obtained using a Bruker Avance-400, Avance-500 or Avance-600 spectrometer, and the spectra were internally referenced according to CDCl<sub>3</sub> chemical shifts (7.26 ppm for <sup>1</sup>H NMR and 77.16 ppm for <sup>13</sup>C NMR). The spectrometers used for this work are funded by the NSF (CHE-1048642), NIH (1S10 OD020022-1) and a generous gift from Paul J. and Margaret M. Bender. Mass spectrometry was performed with a Thermo Q Exactive™ Plus (electrospray ionization, time-of-flight analyzer or electron impact) and is funded by the NIH (1S10 OD020022-1). Melting points were obtained using a Stanford Research Systems DigiMelt apparatus.

## B. Select Optimization Results

**Table S1.** Cu(II) for arylation.

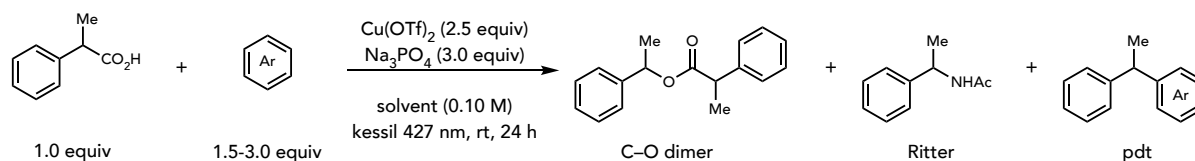

| entry | Ar Nuc | solvent                                            | Nuc<br>equivs | C–O<br>dimer (%) | Ritter (%) | pdt (%) |
|-------|--------|----------------------------------------------------|---------------|------------------|------------|---------|
| 1     |        | $\text{CH}_2\text{Cl}_2$ (0.10 M) + <i>i</i> -PrCN | 3             | 27               | –          | 14      |
| 2     |        | MeCN                                               | 3             | 0                | 52         | 15      |
| 3     |        | $\text{CH}_2\text{Cl}_2$ (0.10 M) + <i>i</i> -PrCN | 1.5           | 28               | –          | 15      |
| 4     |        | $\text{CH}_2\text{Cl}_2$ (0.10 M) + <i>i</i> -PrCN | 3             | 27               | –          | 23      |
| 5     |        | MeCN                                               | 3             | 0                | 24         | 0       |
| 6     |        | $\text{CH}_2\text{Cl}_2$ (0.10 M) + <i>i</i> -PrCN | 1.5           | 28               | –          | 18      |
| 7     |        | $\text{CH}_2\text{Cl}_2$ (0.10 M) + <i>i</i> -PrCN | 3             | 7                | –          | 20      |
| 8     |        | MeCN                                               | 3             | 0                | 2          | 6       |
| 9     |        | $\text{CH}_2\text{Cl}_2$ (0.10 M) + <i>i</i> -PrCN | 1.5           | 2                | –          | 25      |

**General procedure:** In a nitrogen-filled glovebox, an oven-dried 4-mL vial equipped with a stir bar is charged with  $\text{Cu}(\text{OTf})_2$  (0.090 g, 2.5 equiv, 0.25 mmol),  $\text{Na}_3\text{PO}_4$  (0.049 g, 3.0 equiv, 0.30 mmol), the arene nucleophile (if solid),  $\text{CH}_2\text{Cl}_2$  (1.0 mL, 0.10 M), 2-phenylpropanoic acid (0.015 g, 1.0 equiv, 0.10 mmol), the arene nucleophile (if liquid), and *i*-PrCN (50  $\mu\text{L}$ , 0.55 mmol, 5.5 equiv). The vial is sealed, removed from the glovebox, and irradiated, with stirring, at 427 nm with a Kessil® PR160 lamp in a PhotoRedox Box. A fan is used to maintain the vial at room temperature. After 24 h, the crude reaction mixture is diluted with EtOAc and saturated aqueous  $\text{NH}_4\text{Cl}$ . Yields are determined by GC or  $^1\text{H}$  NMR analysis using 1-methylnaphthalene (10  $\mu\text{L}$ ) as an internal standard.

**Table S2.** Metal mediator.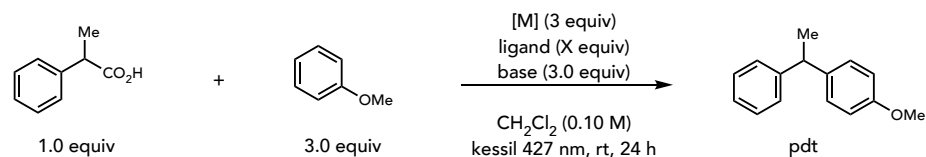

| entry | [M]                                                                | base                            | Ligand                                    | % recovered acid | % pdt | r.r. |
|-------|--------------------------------------------------------------------|---------------------------------|-------------------------------------------|------------------|-------|------|
| 1     | CeCl <sub>3</sub>                                                  | Na <sub>3</sub> PO <sub>4</sub> | 20 mol% TBACl                             | 97               | 0     | -    |
| 2     | CeCl <sub>3</sub>                                                  | Na <sub>3</sub> PO <sub>4</sub> | 3.0 equiv TBACl                           | 100              | 0     | -    |
| 3     | CeCl <sub>3</sub>                                                  | none                            | 3.0 equiv Cs <sub>2</sub> CO <sub>3</sub> | 77               | 0     | -    |
| 4     | Ce(OTf) <sub>4</sub>                                               | Na <sub>3</sub> PO <sub>4</sub> | —                                         | 100              | 0     | -    |
| 5     | Ce(OH) <sub>4</sub>                                                | Na <sub>3</sub> PO <sub>4</sub> | —                                         | 0                | 0     | -    |
| 6     | Ce(OH) <sub>4</sub>                                                | Cs <sub>2</sub> CO <sub>3</sub> | —                                         | 0                | 0     | -    |
| 7     | Mn(OAc) <sub>3</sub>                                               | Na <sub>3</sub> PO <sub>4</sub> | —                                         | 85               | 2     | -    |
| 8     | Mn(OAc) <sub>3</sub>                                               | Na <sub>3</sub> PO <sub>4</sub> | 5.5 equiv <i>i</i> -PrCN                  | 82               | 1     | -    |
| 9     | NiCl <sub>2</sub> ·dme                                             | Na <sub>3</sub> PO <sub>4</sub> | —                                         | 100              | 0     | -    |
| 10    | NiCl <sub>2</sub> ·dme                                             | Na <sub>3</sub> PO <sub>4</sub> | 5.5 equiv <i>i</i> -PrCN                  | 96               | 0     | -    |
| 11    | CuCl <sub>2</sub> ·H <sub>2</sub> O                                | Na <sub>3</sub> PO <sub>4</sub> | —                                         | 27               | 0     | -    |
| 12    | CuCl <sub>2</sub> ·H <sub>2</sub> O                                | Na <sub>3</sub> PO <sub>4</sub> | 5.5 equiv <i>i</i> -PrCN                  | 33               | 0     | -    |
| 13    | CuCl <sub>2</sub>                                                  | Na <sub>3</sub> PO <sub>4</sub> | —                                         | 47               | 0     | -    |
| 14    | CuBr <sub>2</sub>                                                  | Na <sub>3</sub> PO <sub>4</sub> | —                                         | 89               | 0     | -    |
| 15    | CuBr <sub>2</sub>                                                  | Na <sub>3</sub> PO <sub>4</sub> | 5.5 equiv <i>i</i> -PrCN                  | 98               | 0     | -    |
| 16    | Cu(OTf) <sub>2</sub>                                               | Na <sub>3</sub> PO <sub>4</sub> | 5.5 equiv <i>i</i> -PrCN                  | 21               | 14    | 5:1  |
| 17    | CrCl <sub>3</sub>                                                  | Na <sub>3</sub> PO <sub>4</sub> | —                                         | 86               | 0     | -    |
| 18    | CrCl <sub>3</sub>                                                  | Na <sub>3</sub> PO <sub>4</sub> | 5.5 equiv <i>i</i> -PrCN                  | 95               | 0     | -    |
| 19    | FePO <sub>4</sub>                                                  | Na <sub>2</sub> CO <sub>3</sub> | —                                         | 84               | 0     | -    |
| 20    | FePO <sub>4</sub>                                                  | Na <sub>2</sub> CO <sub>3</sub> | 1.0 equiv NaCl                            | 90               | 0     | -    |
| 21    | FePO <sub>4</sub>                                                  | Na <sub>2</sub> CO <sub>3</sub> | 3.0 equiv NaCl                            | 89               | 0     | -    |
| 22    | FePO <sub>4</sub>                                                  | Na <sub>2</sub> CO <sub>3</sub> | 1.0 equiv TBACl                           | 93               | 0     | -    |
| 23    | FePO <sub>4</sub>                                                  | Na <sub>2</sub> CO <sub>3</sub> | 3.0 equiv TBACl                           | 87               | 0     | -    |
| 24    | Fe <sub>2</sub> (SO <sub>4</sub> ) <sub>3</sub> ·5H <sub>2</sub> O | Na <sub>2</sub> CO <sub>3</sub> | —                                         | 86               | 0     | -    |
| 25    | FeF <sub>3</sub>                                                   | Na <sub>2</sub> CO <sub>3</sub> | —                                         | 99               | 0     | -    |
| 26    | Fe(acac) <sub>3</sub>                                              | Na <sub>2</sub> CO <sub>3</sub> | —                                         | 99               | 0     | -    |
| 27    | Fe(OTf) <sub>3</sub>                                               | Na <sub>3</sub> PO <sub>4</sub> | —                                         | 9                | 79    | 4:1  |
| 28    | Fe(OTf) <sub>3</sub>                                               | Na <sub>3</sub> PO <sub>4</sub> | 5.5 equiv <i>i</i> -PrCN                  | 16               | 76    | 4:1  |
| 29    | FeCl <sub>3</sub>                                                  | Na <sub>2</sub> CO <sub>3</sub> | —                                         | 34               | 45    | 5:1  |
| 30    | FeCl <sub>3</sub>                                                  | Na <sub>3</sub> PO <sub>4</sub> | —                                         | 17               | 56    | 5:1  |

**General procedure:** In a nitrogen-filled glovebox, an oven-dried 4-mL vial equipped with a stir bar is charged with the metal salt (3.0 equiv), Na<sub>3</sub>PO<sub>4</sub> (0.049 g, 3.0 equiv, 0.30 mmol) or Na<sub>2</sub>CO<sub>3</sub> (0.032 g, 3.0 equiv, 0.30 mmol), the ligand (if solid), CH<sub>2</sub>Cl<sub>2</sub> (1.0 mL, 0.10 M), 2-phenylpropanoic acid (0.015 g, 1.0 equiv, 0.10 mmol), anisole (32.6 μL, 3.0 equiv, 0.30 mmol), and the ligand (if liquid). The vial is sealed, removed from the glovebox, and irradiated, with stirring, at 427 nm with a Kessil® PR160 lamp in a PhotoRedox Box. A fan is used to maintain the vial at room temperature. After 24 h, the crude reaction mixture is diluted with EtOAc and saturated aqueous NH<sub>4</sub>Cl. Yields are determined by GC or <sup>1</sup>H NMR analysis using 1-methylnaphthalene (10 μL) as an internal standard.

Commentary on reactions with poor mass balance:

We observed significant decomposition of the starting materials with no identifiable major products present for entries 5 and 6. We believe in entries 11-13 the poor recovery of the acid is due to it strongly coordinating the copper. Under our standard workup conditions, most of the unreacted acid is in the aqueous layer. For entry 16, the C–O dimer was the major product (27% yield from <sup>1</sup>H NMR analysis of the crude reaction mixture) which is formed upon nucleophilic attack of another equivalent of the carboxylic acid.

**Table S3.** Fe loading.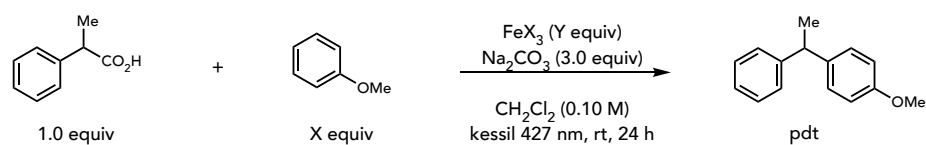

| entry | Fe salt              | Fe equiv | anisole equiv | % pdt | r.r. |
|-------|----------------------|----------|---------------|-------|------|
| 1     | FeCl <sub>3</sub>    | 2.0      | 5.0           | 50    | 4.8  |
| 2     | FeCl <sub>3</sub>    | 3.0      | 5.0           | 54    | 5.0  |
| 3     | FeCl <sub>3</sub>    | 4.0      | 5.0           | 53    | 4.9  |
| 4     | FeCl <sub>3</sub>    | 5.0      | 5.0           | 65    | 5.1  |
| 5     | FeCl <sub>3</sub>    | 7.0      | 5.0           | 28    | 4.2  |
| 6     | Fe(OTf) <sub>3</sub> | 2.0      | 1.5           | 45    | 3.8  |
| 7     | Fe(OTf) <sub>3</sub> | 3.0      | 1.5           | 53    | 3.9  |
| 8     | Fe(OTf) <sub>3</sub> | 4.0      | 1.5           | 61    | 4.0  |
| 9     | Fe(OTf) <sub>3</sub> | 5.0      | 1.5           | 61    | 4.1  |
| 10    | Fe(OTf) <sub>3</sub> | 2.0      | 3.0           | 59    | 3.8  |
| 11    | Fe(OTf) <sub>3</sub> | 3.0      | 3.0           | 74    | 3.9  |
| 12    | Fe(OTf) <sub>3</sub> | 4.0      | 3.0           | 80    | 4.0  |
| 13    | Fe(OTf) <sub>3</sub> | 5.0      | 3.0           | 83    | 4.0  |
| 14    | Fe(OTf) <sub>3</sub> | 2.0      | 5.0           | 70    | 3.6  |
| 15    | Fe(OTf) <sub>3</sub> | 3.0      | 5.0           | 90    | 3.8  |
| 16    | Fe(OTf) <sub>3</sub> | 4.0      | 5.0           | 87    | 3.6  |
| 17    | Fe(OTf) <sub>3</sub> | 5.0      | 5.0           | 89    | 3.6  |

**General procedure:** In a nitrogen-filled glovebox, an oven-dried 4-mL vial equipped with a stir bar is charged with the Fe salt (2.0 – 7.0 equiv), Na<sub>2</sub>CO<sub>3</sub> (0.032 g, 3.0 equiv, 0.30 mmol), CH<sub>2</sub>Cl<sub>2</sub> (1.0 mL, 0.10 M), 2-phenylpropanoic acid (0.015 g, 1.0 equiv, 0.10 mmol), and anisole (1.5 – 5.0 equiv). The vial is sealed, removed from the glovebox, and irradiated, with stirring, at 427 nm with a Kessil® PR160 lamp in a PhotoRedox Box. A fan is used to maintain the vial at room temperature. After 24 h, the crude reaction mixture is diluted with EtOAc and saturated aqueous NH<sub>4</sub>Cl. Yields are determined by GC or <sup>1</sup>H NMR analysis using 1-methylnaphthalene (10 μL) as an internal standard.

**Table S4.** Arene nucleophile loading.

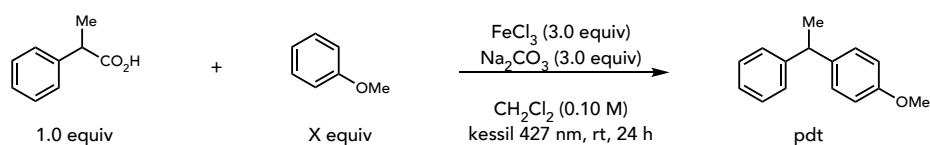

| entry | Nuc equivs | % recovered acid | % pdt | r.r. |
|-------|------------|------------------|-------|------|
| 1     | 1.5        | 0                | 54    | 4.8  |
| 2     | 3.0        | 0                | 52    | 5.2  |
| 3     | 5.0        | 0                | 54    | 5.0  |
| 4     | 20         | 0                | 61    | 4.8  |

**General procedure:** In a nitrogen-filled glovebox, an oven-dried 4-mL vial equipped with a stir bar is charged with FeCl<sub>3</sub> (0.049 g, 3.0 equiv, 0.30 mmol), Na<sub>2</sub>CO<sub>3</sub> (0.032 g, 3.0 equiv, 0.30 mmol), CH<sub>2</sub>Cl<sub>2</sub> (1.0 mL, 0.10 M), 2-phenylpropanoic acid (0.015 g, 1.0 equiv, 0.10 mmol), and anisole (1.5 – 20 equiv). The vial is sealed, removed from the glovebox, and irradiated, with stirring, at 427 nm with a Kessil® PR160 lamp in a PhotoRedox Box. A fan is used to maintain the vial at room temperature. After 24 h, the crude reaction mixture is diluted with EtOAc and saturated aqueous NH<sub>4</sub>Cl. Yields are determined by GC or <sup>1</sup>H NMR analysis using 1-methylnaphthalene (10 μL) as an internal standard.



**Table S5.** Base with 3.0 equiv anisole and FeCl<sub>3</sub>.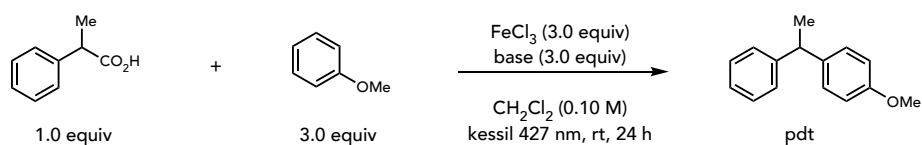

| entry | base                             | % pdt | r.r. |
|-------|----------------------------------|-------|------|
| 1     | Na <sub>3</sub> PO <sub>4</sub>  | 54    | 5.0  |
| 2     | K <sub>3</sub> PO <sub>4</sub>   | 77    | 5.1  |
| 3     | Na <sub>2</sub> CO <sub>3</sub>  | 41    | 4.9  |
| 4     | K <sub>2</sub> CO <sub>3</sub>   | 26    | 4.6  |
| 5     | Cs <sub>2</sub> CO <sub>3</sub>  | 3     | 6.7  |
| 6     | Na <sub>2</sub> HPO <sub>4</sub> | 5     | 5.1  |
| 7     | K <sub>2</sub> HPO <sub>4</sub>  | 87    | 5.1  |
| 8     | NaH <sub>2</sub> PO <sub>4</sub> | 3     | 5.5  |
| 9     | KH <sub>2</sub> PO <sub>4</sub>  | 1     | 6.6  |
| 10    | NaOAc                            | 88    | 5.0  |
| 11    | Pyridine                         | 37    | 4.7  |
| 12    | DABCO                            | 29    | 6.4  |

**General procedure:** In a nitrogen-filled glovebox, an oven-dried 4-mL vial equipped with a stir bar is charged with FeCl<sub>3</sub> (0.049 g, 3.0 equiv, 0.30 mmol), base (3.0 equiv), CH<sub>2</sub>Cl<sub>2</sub> (1.0 mL, 0.10 M), 2-phenylpropanoic acid (0.015 g, 1.0 equiv, 0.10 mmol), and anisole (32.6 μL, 3.0 equiv, 0.30 mmol). The vial is sealed, removed from the glovebox, and irradiated, with stirring, at 427 nm with a Kessil® PR160 lamp in a PhotoRedox Box. A fan is used to maintain the vial at room temperature. After 24 h, the crude reaction mixture is diluted with EtOAc and saturated aqueous NH<sub>4</sub>Cl. Yields are determined by GC or <sup>1</sup>H NMR analysis using 1-methylnaphthalene (10 μL) as an internal standard.

**Table S6.** Base with 3.0 equiv anisole and Fe(OTf)<sub>3</sub>.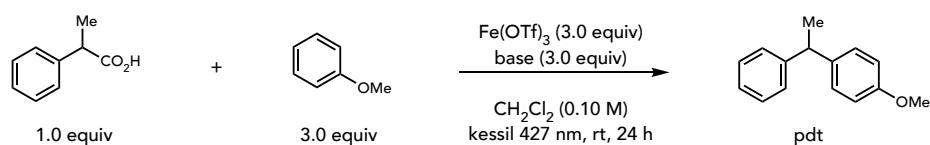

| entry | base                             | % pdt | r.r. |
|-------|----------------------------------|-------|------|
| 1     | Na <sub>3</sub> PO <sub>4</sub>  | 80    | 3.8  |
| 2     | K <sub>3</sub> PO <sub>4</sub>   | 1     | 7.2  |
| 3     | Na <sub>2</sub> CO <sub>3</sub>  | 76    | 3.9  |
| 4     | K <sub>2</sub> CO <sub>3</sub>   | 68    | 3.9  |
| 5     | Cs <sub>2</sub> CO <sub>3</sub>  | 2     | 0.5  |
| 6     | Na <sub>2</sub> HPO <sub>4</sub> | 64    | 3.8  |
| 7     | K <sub>2</sub> HPO <sub>4</sub>  | 72    | 3.8  |
| 8     | NaH <sub>2</sub> PO <sub>4</sub> | 8     | 3.0  |
| 9     | KH <sub>2</sub> PO <sub>4</sub>  | 4     | 2.6  |
| 10    | NaOAc                            | 79    | 3.8  |
| 11    | Pyridine                         | 47    | 4.4  |
| 12    | DABCO                            | 10    | 3.5  |

**General procedure:** In a nitrogen-filled glovebox, an oven-dried 4-mL vial equipped with a stir bar is charged with Fe(OTf)<sub>3</sub> (0.151 g, 3.0 equiv, 0.30 mmol), base (3.0 equiv), CH<sub>2</sub>Cl<sub>2</sub> (1.0 mL, 0.10 M), 2-phenylpropanoic acid (0.015 g, 1.0 equiv, 0.10 mmol), and anisole (32.6 μL, 3.0 equiv, 0.30 mmol). The vial is sealed, removed from the glovebox, and irradiated, with stirring, at 427 nm with a Kessil® PR160 lamp in a PhotoRedox Box. A fan is used to maintain the vial at room temperature. After 24 h, the crude reaction mixture is diluted with EtOAc and saturated aqueous NH<sub>4</sub>Cl. Yields are determined by GC or <sup>1</sup>H NMR analysis using 1-methylnaphthalene (10 μL) as an internal standard.

**Table S7.** Reactivity with less activated arenes.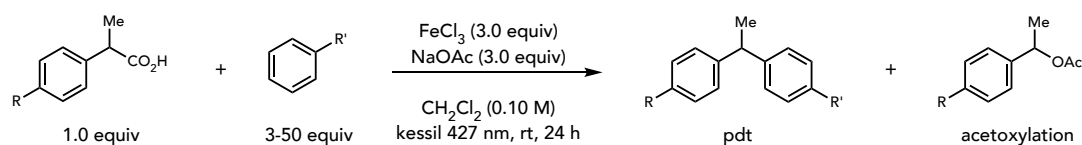

| entry | nuc           | nuc equiv | R  | % pdt | r.r. | % acetoxylation |
|-------|---------------|-----------|----|-------|------|-----------------|
| 1     | toluene       | 3         | Me | 52    | 5:1  | 12              |
| 2     | toluene       | 5         | Me | 62    | 5:1  | 6               |
| 3     | toluene       | 10        | Me | 77    | 6:1  | 6               |
| 4     | toluene       | 20        | Me | 75    | 5:1  | 0               |
| 5     | toluene       | 3         | H  | 61    | 6:1  | 12              |
| 6     | toluene       | 5         | H  | 72    | 6:1  | 10              |
| 7     | toluene       | 10        | H  | 82    | 6:1  | 9               |
| 8     | toluene       | 20        | H  | 78    | 6:1  | 8               |
| 9     | benzene       | 3         | Me | 6     | –    | 14              |
| 10    | benzene       | 5         | Me | 8     | –    | 11              |
| 11    | benzene       | 10        | Me | 14    | –    | 14              |
| 12    | benzene       | 20        | Me | 16    | –    | 9               |
| 13    | benzene       | 3         | H  | 12    | –    | 21              |
| 14    | benzene       | 5         | H  | 18    | –    | 15              |
| 15    | benzene       | 10        | H  | 25    | –    | 16              |
| 16    | benzene       | 20        | H  | 41    | –    | 22              |
| 17    | fluorobenzene | 5         | H  | 9     | 5:1  | 31              |
| 18    | fluorobenzene | 10        | H  | 15    | 5:1  | 33              |
| 19    | fluorobenzene | 20        | H  | 21    | 5:1  | 31              |
| 20    | fluorobenzene | 50        | H  | 43    | 6:1  | 37              |
| 21    | bromobenzene  | 5         | H  | 0     | –    | 0               |
| 22    | bromobenzene  | 10        | H  | 0     | –    | 0               |
| 23    | bromobenzene  | 20        | H  | 0     | –    | 0               |
| 24    | bromobenzene  | 50        | H  | 0     | –    | 49              |
| 25    | chlorobenzene | 5         | H  | 0     | –    | 0               |
| 26    | chlorobenzene | 10        | H  | 0     | –    | 0               |
| 27    | chlorobenzene | 20        | H  | 0     | –    | 0               |
| 28    | chlorobenzene | 50        | H  | 15    | –    | 30              |

**General procedure:** In a nitrogen-filled glovebox, an oven-dried 4-mL vial equipped with a stir bar is charged with  $\text{FeCl}_3$  (0.049 g, 3.0 equiv, 0.30 mmol),  $\text{NaOAc}$  (0.025 g, 3.0 equiv, 0.30 mmol),  $\text{CH}_2\text{Cl}_2$  (1.0 mL, 0.10 M), 2-phenylpropanoic acid (0.015 g, 1.0 equiv, 0.10 mmol) or 2-(*p*-tolyl)propanoic acid (0.016 g, 1.0 equiv, 0.10 mmol), and the arene nucleophile (1.0 – 20 equiv). The vial is sealed, removed from the glovebox, and irradiated, with stirring, at 427 nm with a Kessil® PR160 lamp in a PhotoRedox Box. A fan is used to maintain the vial at room temperature. After 24 h, the crude reaction mixture is diluted with EtOAc and saturated aqueous  $\text{NH}_4\text{Cl}$ . Yields are determined by GC or  $^1\text{H}$  NMR analysis using 1-methylnaphthalene (10  $\mu\text{L}$ ) as an internal standard.

**Table S8.** Base screen with furan and thiophene.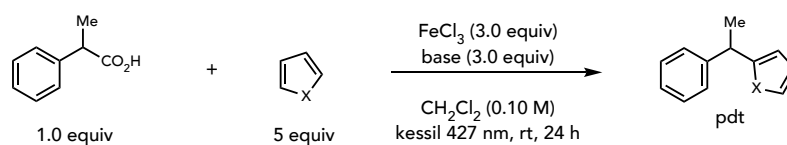

| entry | nuc       | base                      | % pdt | r.r.  |
|-------|-----------|---------------------------|-------|-------|
| 1     | furan     | $\text{Na}_3\text{PO}_4$  | 8     | >20:1 |
| 2     | furan     | $\text{K}_3\text{PO}_4$   | 51    | >20:1 |
| 3     | furan     | $\text{Na}_2\text{CO}_3$  | 9     | >20:1 |
| 4     | furan     | $\text{K}_2\text{CO}_3$   | 18    | >20:1 |
| 5     | furan     | $\text{NaOAc}$            | 22    | >20:1 |
| 6     | furan     | $\text{K}_2\text{HPO}_4$  | 24    | >20:1 |
| 7     | furan     | $\text{Na}_2\text{HPO}_4$ | 5     | >20:1 |
| 8     | furan     | Pyridine                  | 22    | >20:1 |
| 9     | thiophene | $\text{Na}_3\text{PO}_4$  | 32    | 5.0:1 |
| 10    | thiophene | $\text{K}_3\text{PO}_4$   | 68    | 6.6:1 |
| 11    | thiophene | $\text{Na}_2\text{CO}_3$  | 31    | 6.8:1 |
| 12    | thiophene | $\text{K}_2\text{CO}_3$   | 10    | 4.5:1 |
| 13    | thiophene | $\text{Cs}_2\text{CO}_3$  | 0     | –     |
| 14    | thiophene | $\text{Na}_2\text{HPO}_4$ | 0     | –     |
| 15    | thiophene | $\text{K}_2\text{HPO}_4$  | 27    | 6.6:1 |
| 16    | thiophene | $\text{NaH}_2\text{PO}_4$ | 0     | –     |
| 17    | thiophene | $\text{KH}_2\text{PO}_4$  | 0     | –     |
| 18    | thiophene | $\text{NaOAc}$            | 60    | 4.5:1 |
| 19    | thiophene | Pyridine                  | 11    | 3.0:1 |
| 20    | thiophene | DABCO                     | 32    | 7.0:1 |

**General procedure:** In a nitrogen-filled glovebox, an oven-dried 4-mL vial equipped with a stir bar is charged with  $\text{FeCl}_3$  (0.049 g, 3.0 equiv, 0.30 mmol), base (3.0 equiv),  $\text{CH}_2\text{Cl}_2$  (1.0 mL, 0.10 M), 2-phenylpropanoic acid (0.015 g, 1.0 equiv, 0.10 mmol), and the arene nucleophile (5.0 equiv). The vial is sealed, removed from the glovebox, and irradiated, with stirring, at 427 nm with a Kessil<sup>®</sup> PR160 lamp in a PhotoRedox Box. A fan is used to maintain the vial at room temperature. After 24 h, the crude reaction mixture is diluted with EtOAc and saturated aqueous  $\text{NH}_4\text{Cl}$ . Yields are determined by GC or  $^1\text{H}$  NMR analysis using 1-methylnaphthalene (10  $\mu\text{L}$ ) as an internal standard.

**Table S9.** Base screen with benzofuran.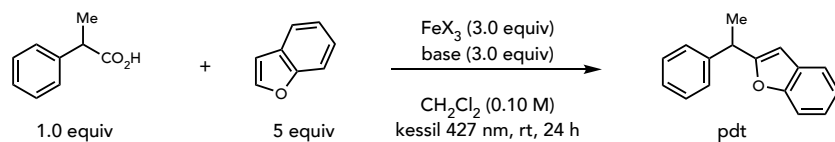

| entry | Fe salt                   | base                      | % pdt | r.r.  |
|-------|---------------------------|---------------------------|-------|-------|
| 1     | $\text{FeCl}_3$           | $\text{K}_3\text{PO}_4$   | trace | >20:1 |
| 2     | $\text{FeCl}_3$           | Pyridine                  | 17    | 3.7:1 |
| 3     | $\text{Fe}(\text{OTf})_3$ | $\text{Na}_3\text{PO}_4$  | 67    | 5.1:1 |
| 4     | $\text{Fe}(\text{OTf})_3$ | $\text{K}_3\text{PO}_4$   | 3     | 1.6:1 |
| 5     | $\text{Fe}(\text{OTf})_3$ | $\text{Na}_2\text{CO}_3$  | 41    | 3.6:1 |
| 6     | $\text{Fe}(\text{OTf})_3$ | $\text{K}_2\text{CO}_3$   | 42    | 4.1:1 |
| 7     | $\text{Fe}(\text{OTf})_3$ | NaOAc                     | 56    | 3.6:1 |
| 8     | $\text{Fe}(\text{OTf})_3$ | $\text{K}_2\text{HPO}_4$  | 37    | 4.6:1 |
| 9     | $\text{Fe}(\text{OTf})_3$ | $\text{Na}_2\text{HPO}_4$ | 21    | 6.6:1 |
| 10    | $\text{Fe}(\text{OTf})_3$ | Pyridine                  | 67    | 3.8:1 |

**General procedure:** In a nitrogen-filled glovebox, an oven-dried 4-mL vial equipped with a stir bar is charged with the Fe salt (3.0 equiv), base (3.0 equiv),  $\text{CH}_2\text{Cl}_2$  (1.0 mL, 0.10 M), 2-phenylpropanoic acid (0.015 g, 1.0 equiv, 0.10 mmol), and benzofuran (53.9  $\mu\text{L}$ , 5.0 equiv, 0.50 mmol). The vial is sealed, removed from the glovebox, and irradiated, with stirring, at 427 nm with a Kessil<sup>®</sup> PR160 lamp in a PhotoRedox Box. A fan is used to maintain the vial at room temperature. After 24 h, the crude reaction mixture is diluted with EtOAc and saturated aqueous  $\text{NH}_4\text{Cl}$ . Yields are determined by GC or  $^1\text{H}$  NMR analysis using 1-methylnaphthalene (10  $\mu\text{L}$ ) as an internal standard.

**Table S10.** Optimization of  $\alpha,4$ -dimethylphenylacetic acid with 2-phenylethanol.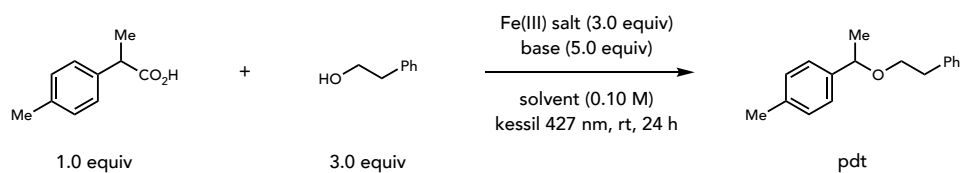

| entry | solvent                         | Fe(III) salt                      | base                            | pdt |
|-------|---------------------------------|-----------------------------------|---------------------------------|-----|
| 1     | CH <sub>2</sub> Cl <sub>2</sub> | FeCl <sub>3</sub>                 | Na <sub>3</sub> PO <sub>4</sub> | 39% |
| 2     | 1,2-DCE                         | FeCl <sub>3</sub>                 | Na <sub>3</sub> PO <sub>4</sub> | 41% |
| 3     | MeCN                            | FeCl <sub>3</sub>                 | Na <sub>3</sub> PO <sub>4</sub> | 70% |
| 4     | toluene                         | FeCl <sub>3</sub>                 | Na <sub>3</sub> PO <sub>4</sub> | 18% |
| 5     | CH <sub>2</sub> Cl <sub>2</sub> | FeCl <sub>3</sub>                 | K <sub>3</sub> PO <sub>4</sub>  | 37% |
| 6     | CH <sub>2</sub> Cl <sub>2</sub> | FeCl <sub>3</sub>                 | K <sub>2</sub> HPO <sub>4</sub> | 70% |
| 7     | CH <sub>2</sub> Cl <sub>2</sub> | FeCl <sub>3</sub>                 | NaOAc                           | 32% |
| 8     | CH <sub>2</sub> Cl <sub>2</sub> | FeCl <sub>3</sub>                 | pyridine                        | 17% |
| 9     | CH <sub>2</sub> Cl <sub>2</sub> | Fe(acac) <sub>3</sub>             | K <sub>2</sub> HPO <sub>4</sub> | 61% |
| 10    | CH <sub>2</sub> Cl <sub>2</sub> | Fe(NO <sub>3</sub> ) <sub>3</sub> | K <sub>2</sub> HPO <sub>4</sub> | 0%  |
| 11    | CH <sub>2</sub> Cl <sub>2</sub> | Fe(OTf) <sub>3</sub>              | K <sub>2</sub> HPO <sub>4</sub> | 77% |
| 15    | 1,2-DCE                         | Fe(OTf) <sub>3</sub>              | K <sub>2</sub> HPO <sub>4</sub> | 74% |

**General procedure:** In a nitrogen-filled glovebox, an oven-dried 4-mL vial equipped with a stir bar is charged with Fe(III) salt (3.0 equiv, 0.30 mmol), base (5.0 equiv, 0.50 mmol), solvent (1.0 mL, 0.10 M),  $\alpha,4$ -dimethylphenylacetic acid (1.0 equiv, 0.10 mmol), and 2-phenylethanol (3.0 equiv). The vial is sealed, removed from the glovebox, and irradiated, with stirring, at 427 nm with a Kessil<sup>®</sup> PR160 lamp in a PhotoRedox Box. A fan is used to maintain the vial at room temperature. After 24 h, the crude reaction mixture is diluted with EtOAc and saturated aqueous NH<sub>4</sub>Cl. Yields are determined by <sup>1</sup>H NMR analysis using 1-methylnaphthalene (10  $\mu$ L) as an internal standard.

**Table S11.** Optimization of ibuprofen with 3,3-dimethyl-1-butanol.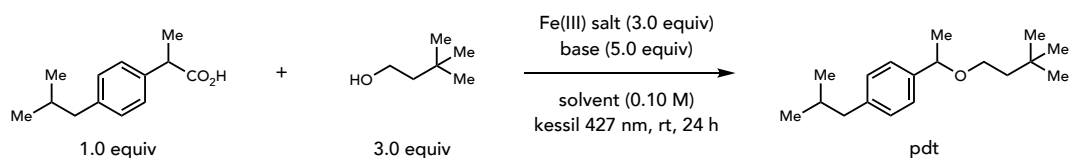

| entry | solvent                         | Fe(III) salt                      | base                            | pdt |
|-------|---------------------------------|-----------------------------------|---------------------------------|-----|
| 1     | CH <sub>2</sub> Cl <sub>2</sub> | FeCl <sub>3</sub>                 | Na <sub>3</sub> PO <sub>4</sub> | 60% |
| 2     | MeCN                            | FeCl <sub>3</sub>                 | Na <sub>3</sub> PO <sub>4</sub> | 77% |
| 3     | toluene                         | FeCl <sub>3</sub>                 | Na <sub>3</sub> PO <sub>4</sub> | 0%  |
| 4     | CH <sub>2</sub> Cl <sub>2</sub> | FeCl <sub>3</sub>                 | K <sub>3</sub> PO <sub>4</sub>  | 97% |
| 5     | CH <sub>2</sub> Cl <sub>2</sub> | FeCl <sub>3</sub>                 | K <sub>2</sub> HPO <sub>4</sub> | 80% |
| 6     | CH <sub>2</sub> Cl <sub>2</sub> | FeCl <sub>3</sub>                 | Na <sub>2</sub> CO <sub>3</sub> | 64% |
| 7     | CH <sub>2</sub> Cl <sub>2</sub> | FeCl <sub>3</sub>                 | NaOAc                           | 72% |
| 8     | CH <sub>2</sub> Cl <sub>2</sub> | FeCl <sub>3</sub>                 | pyridine                        | 72% |
| 9     | CH <sub>2</sub> Cl <sub>2</sub> | Fe(acac) <sub>3</sub>             | K <sub>2</sub> HPO <sub>4</sub> | 0%  |
| 10    | CH <sub>2</sub> Cl <sub>2</sub> | Fe(NO <sub>3</sub> ) <sub>3</sub> | K <sub>2</sub> HPO <sub>4</sub> | 0%  |
| 11    | CH <sub>2</sub> Cl <sub>2</sub> | Fe(OTf) <sub>3</sub>              | K <sub>2</sub> HPO <sub>4</sub> | 74% |
| 12    | 1,2-DCE                         | Fe(OTf) <sub>3</sub>              | K <sub>2</sub> HPO <sub>4</sub> | 99% |
| 13    | CH <sub>2</sub> Cl <sub>2</sub> | none                              | K <sub>2</sub> HPO <sub>4</sub> | 0%  |
| 14*   | CH <sub>2</sub> Cl <sub>2</sub> | Fe(OTf) <sub>3</sub>              | K <sub>2</sub> HPO <sub>4</sub> | 0%  |
| 15    | CH <sub>2</sub> Cl <sub>2</sub> | Fe(OTf) <sub>3</sub>              | none                            | 0%  |

**General procedure:** In a nitrogen-filled glovebox, an oven-dried 4-mL vial equipped with a stir bar is charged with Fe(III) salt (3.0 equiv, 0.30 mmol), base (5.0 equiv, 0.50 mmol), solvent (1.0 mL, 0.10 M), ibuprofen (1.0 equiv, 0.10 mmol), and 3,3-dimethyl-1-butanol (3.0 equiv). The vial is sealed, removed from the glovebox, and irradiated, with stirring, at 427 nm with a Kessil® PR160 lamp in a PhotoRedox Box. A fan is used to maintain the vial at room temperature. After 24 h, the crude reaction mixture is diluted with EtOAc and saturated aqueous NH<sub>4</sub>Cl. Yields are determined by <sup>1</sup>H NMR analysis using 1-methylnaphthalene (10 μL) as an internal standard. \*Thermal control reaction. The reaction vial was wrapped in foil to block irradiation.

**Table S12:** Optimization of 2-phenylpropanoic acid with 2-phenylethanol.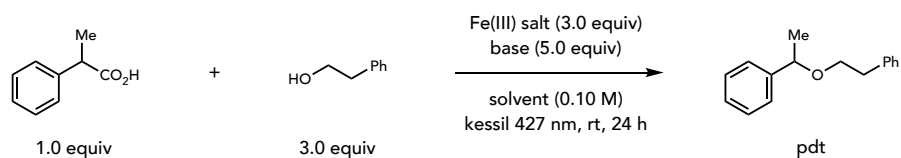

| entry | solvent                         | Fe(III) salt                      | base                            | pdt |
|-------|---------------------------------|-----------------------------------|---------------------------------|-----|
| 1     | CH <sub>2</sub> Cl <sub>2</sub> | FeCl <sub>3</sub>                 | Na <sub>3</sub> PO <sub>4</sub> | 64% |
| 2     | 1,2-DCE                         | FeCl <sub>3</sub>                 | Na <sub>3</sub> PO <sub>4</sub> | 41% |
| 3     | MeCN                            | FeCl <sub>3</sub>                 | Na <sub>3</sub> PO <sub>4</sub> | 0%  |
| 4     | toluene                         | FeCl <sub>3</sub>                 | Na <sub>3</sub> PO <sub>4</sub> | 16% |
| 5     | CH <sub>2</sub> Cl <sub>2</sub> | FeCl <sub>3</sub>                 | K <sub>3</sub> PO <sub>4</sub>  | 23% |
| 6     | CH <sub>2</sub> Cl <sub>2</sub> | FeCl <sub>3</sub>                 | K <sub>2</sub> HPO <sub>4</sub> | 72% |
| 7     | CH <sub>2</sub> Cl <sub>2</sub> | FeCl <sub>3</sub>                 | Na <sub>2</sub> CO <sub>3</sub> | 54% |
| 8     | CH <sub>2</sub> Cl <sub>2</sub> | FeCl <sub>3</sub>                 | NaOAc                           | 35% |
| 9     | CH <sub>2</sub> Cl <sub>2</sub> | FeCl <sub>3</sub>                 | pyridine                        | 0%  |
| 10    | CH <sub>2</sub> Cl <sub>2</sub> | Fe(acac) <sub>3</sub>             | K <sub>2</sub> HPO <sub>4</sub> | 0%  |
| 11    | CH <sub>2</sub> Cl <sub>2</sub> | Fe(NO <sub>3</sub> ) <sub>3</sub> | K <sub>2</sub> HPO <sub>4</sub> | 0%  |
| 12    | CH <sub>2</sub> Cl <sub>2</sub> | Fe(OTf) <sub>3</sub>              | K <sub>2</sub> HPO <sub>4</sub> | 89% |
| 13    | 1,2-DCE                         | Fe(OTf) <sub>3</sub>              | K <sub>2</sub> HPO <sub>4</sub> | 44% |

**General procedure:** In a nitrogen-filled glovebox, an oven-dried 4-mL vial equipped with a stir bar is charged with Fe(III) salt (3.0 equiv, 0.30 mmol), base (5.0 equiv, 0.50 mmol), solvent (1.0 mL, 0.10 M), 2-phenylpropanoic acid (1.0 equiv, 0.10 mmol), and 2-phenylethanol (3.0 equiv). The vial is sealed, removed from the glovebox, and irradiated, with stirring, at 427 nm with a Kessil® PR160 lamp in a PhotoRedox Box. A fan is used to maintain the vial at room temperature. After 24 h, the crude reaction mixture is diluted with EtOAc and saturated aqueous NH<sub>4</sub>Cl. Yields are determined by <sup>1</sup>H NMR analysis using 1-methylnaphthalene (10 μL) as an internal standard.



**Table S13:** Optimization of etherification with tetrahydro-2-furoic acid.

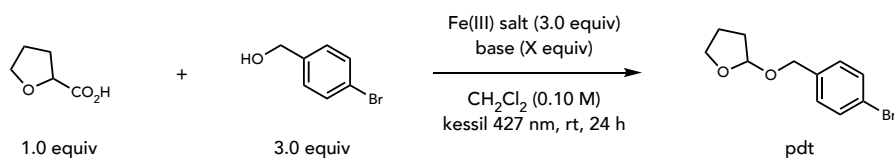

| entry | Fe(III) salt         | base                            | base equiv | % pdt |
|-------|----------------------|---------------------------------|------------|-------|
| 1     | Fe(OTf) <sub>3</sub> | NaOAc                           | 3          | 55    |
| 2     | Fe(OTf) <sub>3</sub> | pyridine                        | 3          | 72    |
| 3     | Fe(OTf) <sub>3</sub> | K <sub>2</sub> HPO <sub>4</sub> | 5          | 36    |
| 4     | FeCl <sub>3</sub>    | NaOAc                           | 3          | 0     |

**General procedure:** In a nitrogen-filled glovebox, an oven-dried 4-mL vial equipped with a stir bar is charged with Fe(III) salt (3.0 equiv, 0.30 mmol), base (X equiv), CH<sub>2</sub>Cl<sub>2</sub> (1.0 mL, 0.10 M), tetrahydro-2-furoic acid (1.0 equiv, 0.10 mmol), and 4-bromobenzyl alcohol (3.0 equiv). The vial is sealed, removed from the glovebox, and irradiated, with stirring, at 427 nm with a Kessil® PR160 lamp in a PhotoRedox Box. A fan is used to maintain the vial at room temperature. After 24 h, the crude reaction mixture is diluted with EtOAc and saturated aqueous NH<sub>4</sub>Cl. Yields are determined by <sup>1</sup>H NMR analysis using 1-methylnaphthalene (10 μL) as an internal standard.

**Table S14.** Miscellaneous screens with a sulfonamide nucleophile.

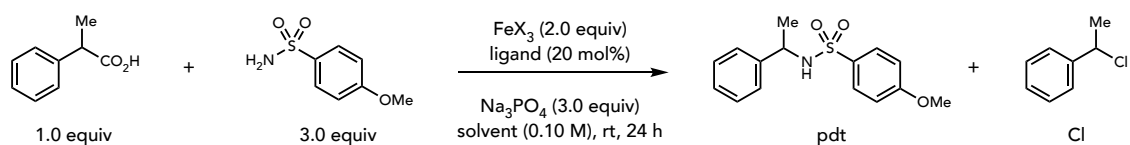

| entry | $\text{FeX}_3$            | solvent                  | ligand                             | % pdt | % Cl | % recovered acid |
|-------|---------------------------|--------------------------|------------------------------------|-------|------|------------------|
| 1     | $\text{Fe}(\text{OTf})_3$ | $\text{CH}_2\text{Cl}_2$ | ( <i>t</i> -Bu) <sub>3</sub> terpy | 67    | –    | 44               |
| 2     | $\text{Fe}(\text{OTf})_3$ | $\text{CH}_2\text{Cl}_2$ | bpy                                | 70    | –    | 24               |
| 3     | $\text{Fe}(\text{OTf})_3$ | $\text{CH}_2\text{Cl}_2$ | py                                 | 70    | –    | 17               |
| 4     | $\text{Fe}(\text{OTf})_3$ | $\text{CH}_2\text{Cl}_2$ | KTp                                | 80    | –    | 13               |
| 5     | $\text{Fe}(\text{OTf})_3$ | $\text{CH}_2\text{Cl}_2$ | none                               | 72    | –    | 18               |
| 6     | $\text{FeCl}_3$           | $\text{CH}_2\text{Cl}_2$ | none                               | 66    | 0    | 14               |
| 7     | $\text{FeBr}_3$           | $\text{CH}_2\text{Cl}_2$ | none                               | 28    | –    | 80               |
| 8     | $\text{FeCl}_3$           | MeCN                     | None                               | 0     | 99   | 0                |
| 9*    | $\text{Fe}(\text{OTf})_3$ | $\text{CH}_2\text{Cl}_2$ | none                               | 0     | –    | 95               |
| 10*   | $\text{Fe}(\text{OTf})_3$ | $\text{CH}_2\text{Cl}_2$ | KTp                                | 0     | –    | 83               |

**General procedure:** In a nitrogen-filled glovebox, an oven-dried 4-mL vial equipped with a stir bar is charged with the Fe salt (2.0 equiv), the ligand (20 mol%),  $\text{Na}_3\text{PO}_4$  (0.049 g, 3.0 equiv, 0.30 mmol), the solvent (1.0 mL, 0.10 M), 2-phenylpropanoic acid (0.015 g, 1.0 equiv, 0.10 mmol), and 4-methoxybenzenesulfonamide (0.056 g, 3.0 equiv, 0.30 mmol). The vial is sealed, removed from the glovebox, and irradiated, with stirring, at 427 nm with a Kessil® PR160 lamp in a PhotoRedox Box. A fan is used to maintain the vial at room temperature. After 24 h, the crude reaction mixture is diluted with EtOAc and saturated aqueous  $\text{NH}_4\text{Cl}$ . Yields are determined by GC or  $^1\text{H}$  NMR analysis using 1-methylnaphthalene (10  $\mu\text{L}$ ) as an internal standard. \*Thermal control reaction. The reaction vial was wrapped in foil to block irradiation.

**Table S15:** Single set of reaction conditions across three nucleophile families.

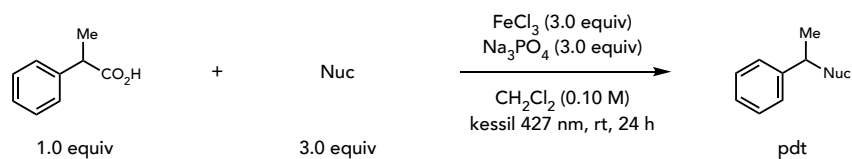

| entry | nuc | pdt | % pdt |
|-------|-----|-----|-------|
| 1     |     |     | 53    |
| 2     |     |     | 64    |
| 3     |     |     | 99*   |

**General procedure:** In a nitrogen-filled glovebox, an oven-dried 4-mL vial equipped with a stir bar is charged with  $\text{FeCl}_3$  (3.0 equiv, 0.30 mmol),  $\text{Na}_3\text{PO}_4$  (3.0 equiv, 0.30 mmol),  $\text{CH}_2\text{Cl}_2$  (1.0 mL, 0.10 M), 2-phenylpropanoic acid (1.0 equiv, 0.10 mmol), and nucleophile (3.0 equiv). The vial is sealed, removed from the glovebox, and irradiated, with stirring, at 427 nm with a Kessil<sup>®</sup> PR160 lamp in a PhotoRedox Box. A fan is used to maintain the vial at room temperature. After 24 h, the crude reaction mixture is diluted with EtOAc and saturated aqueous  $\text{NH}_4\text{Cl}$ . Yields are determined by  $^1\text{H}$  NMR analysis using 1-methylnaphthalene (10  $\mu\text{L}$ ) as an internal standard. \*Isolated yield.

**Table S16:** Reaction conducted under air.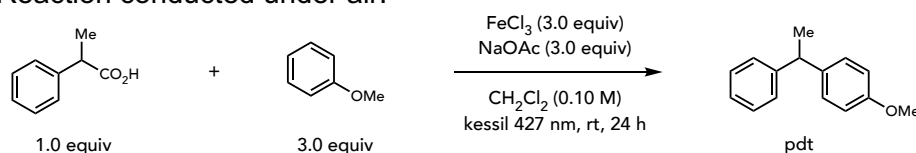

| entry | deviation   | % pdt |
|-------|-------------|-------|
| 1     | open to air | 83    |

**General procedure:** In a nitrogen-filled glovebox, an oven-dried 4-mL vial equipped with a stir bar is charged with  $\text{FeCl}_3$  (3.0 equiv, 0.30 mmol),  $\text{NaOAc}$  (3.0 equiv, 0.30 mmol),  $\text{CH}_2\text{Cl}_2$  (1.0 mL, 0.10 M), 2-phenylpropanoic acid (1.0 equiv, 0.10 mmol), and nucleophile (3.0 equiv). The vial removed from the glovebox, and remained open to air for 10 minutes. The vial was capped and irradiated, with stirring, at 427 nm with a Kessil<sup>®</sup> PR160 lamp in a PhotoRedox Box. A fan is used to maintain the vial at room temperature. After 24 h, the crude reaction mixture is diluted with EtOAc and saturated aqueous  $\text{NH}_4\text{Cl}$ . Yields are determined by  $^1\text{H}$  NMR analysis using 1-methylnaphthalene (10  $\mu\text{L}$ ) as an internal standard.

**Table S17:** Reaction sparged with  $\text{N}_2$ .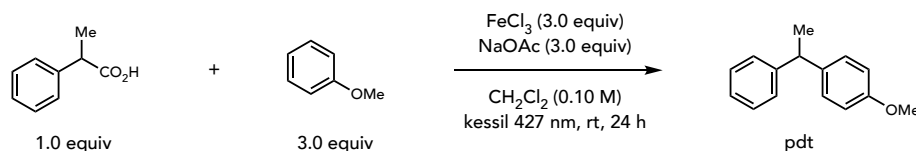

| entry | deviation                          | % pdt |
|-------|------------------------------------|-------|
| 1     | Everything massed outside glovebox | 87    |

**General procedure:** An oven-dried 4-mL vial equipped with a stir bar is charged with  $\text{FeCl}_3$  (3.0 equiv, 0.30 mmol),  $\text{NaOAc}$  (3.0 equiv, 0.30 mmol), 2-phenylpropanoic acid (1.0 equiv, 0.10 mmol), nucleophile (3.0 equiv), and  $\text{CH}_2\text{Cl}_2$  (1.0 mL, 0.10 M). The vial is capped and sparged under  $\text{N}_2$  for 5 minutes. The vial was wrapped in parafilm and irradiated, with stirring, at 427 nm with a Kessil<sup>®</sup> PR160 lamp in a PhotoRedox Box. A fan is used to maintain the vial at room temperature. After 24 h, the crude reaction mixture is diluted with EtOAc and saturated aqueous  $\text{NH}_4\text{Cl}$ . Yields are determined by  $^1\text{H}$  NMR analysis using 1-methylnaphthalene (10  $\mu\text{L}$ ) as an internal standard. Note: We store  $\text{FeCl}_3$  in the glovebox to increase its lifetime as it is very hygroscopic. For this reaction, we removed a vial of excess  $\text{FeCl}_3$  and kept it capped on the benchtop for 24 h. After 24 h, we opened the vial of  $\text{FeCl}_3$  and added all reagents to a new vial as detailed in the General Procedure. The purpose of this reaction was to demonstrate this robust protocol can be applied in laboratory settings that do not contain a glovebox.

**Table S18.** Reaction time course.

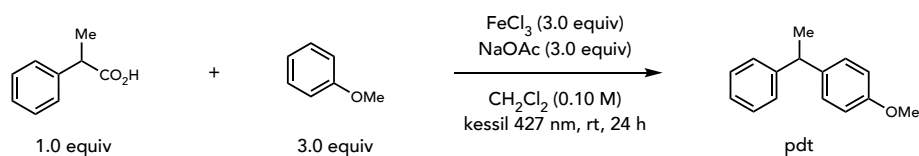

| entry | time (h) | % pdt |
|-------|----------|-------|
| 1     | 1        | 41    |
| 2     | 2        | 69    |
| 3     | 4        | 92    |
| 4     | 6        | 100   |
| 5     | 16       | 92    |
| 6     | 20       | 95    |
| 7     | 24       | 93    |

**General procedure:** In a nitrogen-filled glovebox, an oven-dried 4-mL vial equipped with a stir bar is charged with  $\text{FeCl}_3$  (3.0 equiv, 0.30 mmol),  $\text{NaOAc}$  (3.0 equiv, 0.30 mmol),  $\text{CH}_2\text{Cl}_2$  (1.0 mL, 0.10 M), 2-phenylpropanoic acid (1.0 equiv, 0.10 mmol), and anisole (3.0 equiv). The vial is sealed, removed from the glovebox, and irradiated, with stirring, at 427 nm with a Kessil<sup>®</sup> PR160 lamp in a PhotoRedox Box. A fan is used to maintain the vial at room temperature. Seven identical reactions were irradiated and removed from irradiation at the specified time point. The crude reaction mixture is diluted with EtOAc and saturated aqueous  $\text{NH}_4\text{Cl}$ . Yields are determined by  $^1\text{H}$  NMR analysis using 1-methylnaphthalene (10  $\mu\text{L}$ ) as an internal standard.

**Figure S1.** Plot of the reaction time course.

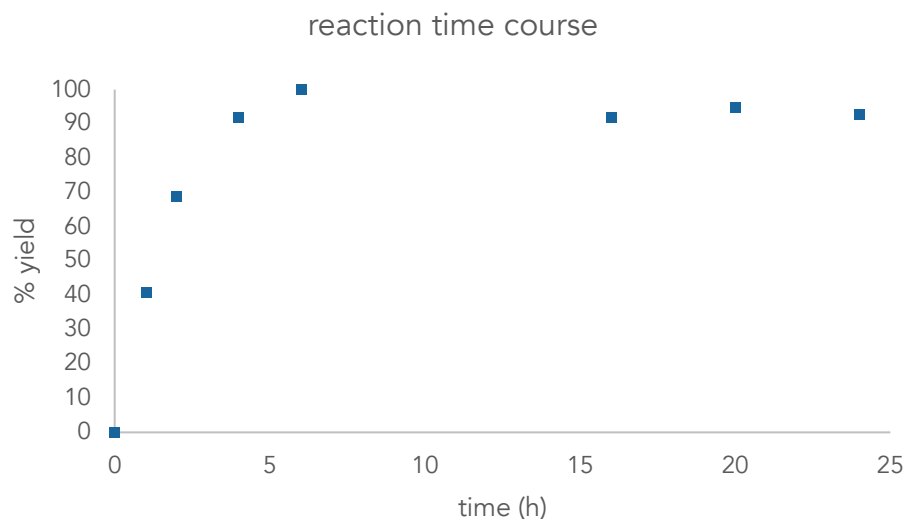

The reaction is complete after four hours and there is no degradation of the product over time. Small differences in the reaction yield (from 4–24 h) can be attributed to the slight variation in the set-up of seven reactions and the error in  $^1\text{H}$  NMR analysis of crude reaction mixtures.

**Table S19.** Comparison to Cu(II) conditions with C- and O- nucleophiles.<sup>16</sup>

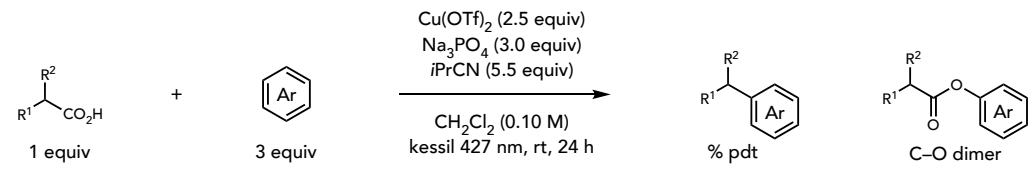

| entry | acid                                                                              | nuc                                                                               | % pdt | C–O dimer |
|-------|-----------------------------------------------------------------------------------|-----------------------------------------------------------------------------------|-------|-----------|
| 1     |  |  | 20%   | 7%        |
| 2     |  |  | 23%   | 27%       |
| 3     |  |  | 14%   | 27%       |
| 4     |  |  | 0%    | 0%        |

**General procedure:** In a nitrogen-filled glovebox, an oven-dried 4-mL vial equipped with a stir bar is charged with Cu(OTf)<sub>2</sub> (2.5 equiv, 0.25 mmol), Na<sub>3</sub>PO<sub>4</sub> (3.0 equiv, 0.30 mmol), CH<sub>2</sub>Cl<sub>2</sub> (1.0 mL, 0.10 M), *i*-PrCN (5.5 equiv, 0.55 mmol), acid (1.0 equiv, 0.10 mmol), and nucleophile (3.0 equiv). The vial is sealed, removed from the glovebox, and irradiated, with stirring, at 427 nm with a Kessil<sup>®</sup> PR160 lamp in a PhotoRedox Box. A fan is used to maintain the vial at room temperature. After 24 h, the crude reaction mixture is diluted with EtOAc and saturated aqueous NH<sub>4</sub>Cl. Yields are determined by <sup>1</sup>H NMR analysis using 1-methylnaphthalene (10 μL) as an internal standard.

**Table S20.** Comparison to Cu(II) with a sulfonamide nucleophile.

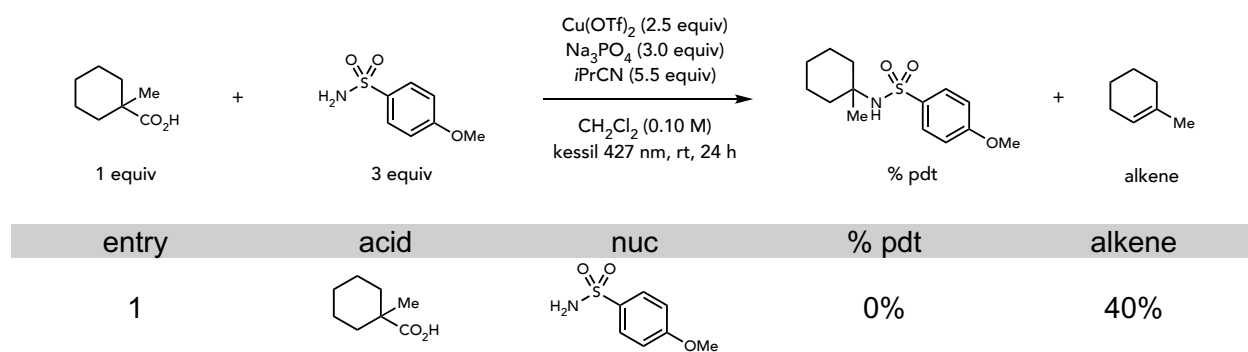

**General procedure:** In a nitrogen-filled glovebox, an oven-dried 4-mL vial equipped with a stir bar is charged with  $\text{Cu}(\text{OTf})_2$  (2.5 equiv, 0.25 mmol),  $\text{Na}_3\text{PO}_4$  (3.0 equiv, 0.30 mmol),  $\text{CH}_2\text{Cl}_2$  (1.0 mL, 0.10 M), *i*-PrCN (5.5 equiv, 0.55 mmol), acid (1.0 equiv, 0.10 mmol), and nucleophile (3.0 equiv). The vial is sealed, removed from the glovebox, and irradiated, with stirring, at 427 nm with a Kessil<sup>®</sup> PR160 lamp in a PhotoRedox Box. A fan is used to maintain the vial at room temperature. After 24 h, the crude reaction mixture is diluted with EtOAc and saturated aqueous  $\text{NH}_4\text{Cl}$ . Yields are determined by  $^1\text{H}$  NMR analysis using 1-methylnaphthalene (10  $\mu\text{L}$ ) as an internal standard.

**Table S21.** Decarboxylative chlorination of 2-phenylpropanoic acid.

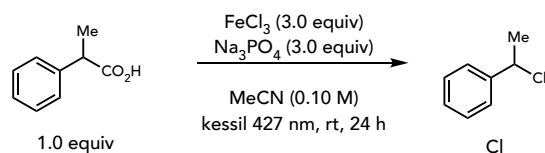

| entry | deviation from rxn cond. | % Cl |
|-------|--------------------------|------|
| 1     | none                     | 99   |

**General procedure:** In a nitrogen-filled glovebox, an oven-dried 4-mL vial equipped with a stir bar is charged with FeCl<sub>3</sub> (3.0 equiv, 0.30 mmol), Na<sub>3</sub>PO<sub>4</sub> (3.0 equiv, 0.30 mmol), MeCN (1.0 mL, 0.10 M), and 2-phenylpropanoic acid (1.0 equiv, 0.10 mmol). The vial is sealed, removed from the glovebox, and irradiated, with stirring, at 427 nm with a Kessil® PR160 lamp in a PhotoRedox Box. A fan is used to maintain the vial at room temperature. After 24 h, the crude reaction mixture is diluted with EtOAc and saturated aqueous NH<sub>4</sub>Cl. Yields are determined by <sup>1</sup>H NMR analysis using 1-methylnaphthalene (10 μL) as an internal standard.

**Table S22.** Decarboxylative chlorination of flurbiprofen.

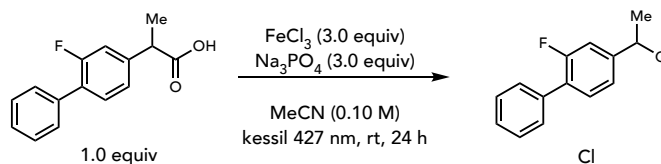

| entry | deviation from rxn cond. | % Cl |
|-------|--------------------------|------|
| 1     | none                     | 92   |

**General procedure:** In a nitrogen-filled glovebox, an oven-dried 4-mL vial equipped with a stir bar is charged with FeCl<sub>3</sub> (3.0 equiv, 0.30 mmol), Na<sub>3</sub>PO<sub>4</sub> (3.0 equiv, 0.30 mmol), MeCN (1.0 mL, 0.10 M), and flurbiprofen (1.0 equiv, 0.10 mmol). The vial is sealed, removed from the glovebox, and irradiated, with stirring, at 427 nm with a Kessil® PR160 lamp in a PhotoRedox Box. A fan is used to maintain the vial at room temperature. After 24 h, the crude reaction mixture is diluted with EtOAc and saturated aqueous NH<sub>4</sub>Cl. Yields are determined by <sup>1</sup>H NMR analysis using 1-methylnaphthalene (10 μL) as an internal standard.



**Table S23.** Fe-mediated arylation from benzylic chloride.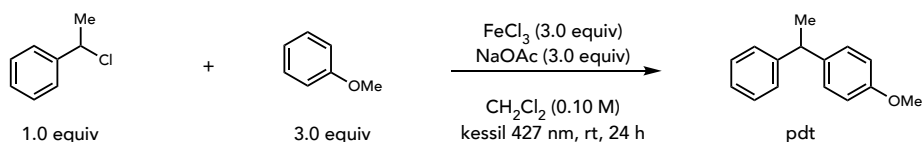

| entry | deviation from rxn cond.        | % pdt  | r.r. |
|-------|---------------------------------|--------|------|
| 1     | none                            | 94     | 5:1  |
| 2*    | no light                        | 84     | 8:1  |
| 3     | no FeCl <sub>3</sub>            | no rxn | —    |
| 4     | no FeCl <sub>3</sub> , no light | no rxn | —    |

**General procedure:** In a nitrogen-filled glovebox, an oven-dried 4-mL vial equipped with a stir bar is charged with FeCl<sub>3</sub> (3.0 equiv, 0.30 mmol), NaOAc (3.0 equiv, 0.30 mmol), CH<sub>2</sub>Cl<sub>2</sub> (1.0 mL, 0.10 M), (1-chloroethyl)benzene (1.0 equiv, 0.10 mmol), and anisole (3.0 equiv, 0.30 mmol). The vial is sealed, removed from the glovebox, and irradiated, with stirring, at 427 nm with a Kessil® PR160 lamp in a PhotoRedox Box. A fan is used to maintain the vial at room temperature. After 24 h, the crude reaction mixture is diluted with EtOAc and saturated aqueous NH<sub>4</sub>Cl. Yields are determined by <sup>1</sup>H NMR analysis using 1-methylnaphthalene (10 μL) as an internal standard.

\*Thermal control reaction. The reaction vial was wrapped in foil to block irradiation.

**Table S24.** Fe-mediated etherification from benzylic chloride.

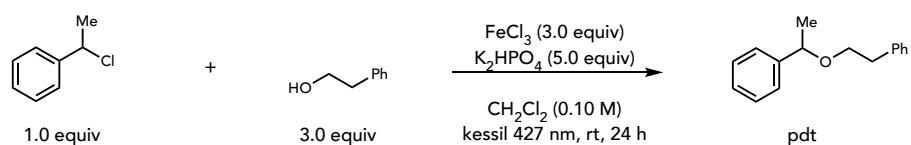

| entry | deviation from rxn cond. | % pdt |
|-------|--------------------------|-------|
| 1     | none                     | 73    |

**General procedure:** In a nitrogen-filled glovebox, an oven-dried 4-mL vial equipped with a stir bar is charged with  $\text{FeCl}_3$  (3.0 equiv, 0.30 mmol),  $\text{K}_2\text{HPO}_4$  (5.0 equiv, 0.50 mmol),  $\text{CH}_2\text{Cl}_2$  (1.0 mL, 0.10 M), (1-chloroethyl)benzene (1.0 equiv, 0.10 mmol), and 2-phenylethanol (3.0 equiv, 0.30 mmol). The vial is sealed, removed from the glovebox, and irradiated, with stirring, at 427 nm with a Kessil<sup>®</sup> PR160 lamp in a PhotoRedox Box. A fan is used to maintain the vial at room temperature. After 24 h, the crude reaction mixture is diluted with EtOAc and saturated aqueous  $\text{NH}_4\text{Cl}$ . Yields are determined by  $^1\text{H}$  NMR analysis using 1-methylnaphthalene (10  $\mu\text{L}$ ) as an internal standard.

**Table S25.** Decarboxylative chlorination of 2-phenylpropanoic acid with CuCl<sub>2</sub>.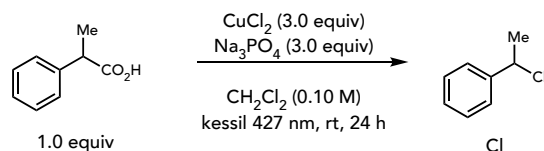

| entry | deviation from rxn cond. | % Cl | % RSM |
|-------|--------------------------|------|-------|
| 1     | none                     | 0    | 96    |

**General procedure:** In a nitrogen-filled glovebox, an oven-dried 4-mL vial equipped with a stir bar is charged with CuCl<sub>2</sub> (3.0 equiv, 0.30 mmol), Na<sub>3</sub>PO<sub>4</sub> (3.0 equiv, 0.30 mmol), CH<sub>2</sub>Cl<sub>2</sub> (1.0 mL, 0.10 M), and 2-phenylpropanoic acid (1.0 equiv, 0.10 mmol). The vial is sealed, removed from the glovebox, and irradiated, with stirring, at 427 nm with a Kessil<sup>®</sup> PR160 lamp in a PhotoRedox Box. A fan is used to maintain the vial at room temperature. After 24 h, the crude reaction mixture is diluted with EtOAc and saturated aqueous NH<sub>4</sub>Cl. Yields are determined by <sup>1</sup>H NMR analysis using 1-methylnaphthalene (10 μL) as an internal standard.

**Table S26.** Cu-mediated arylation from benzylic chloride.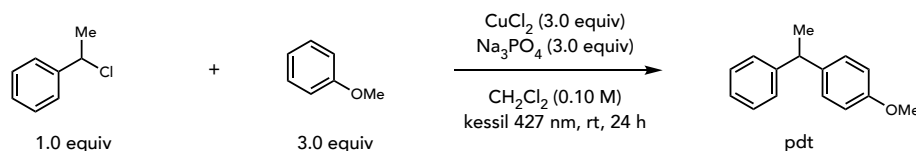

| entry | deviation from rxn cond. | % pdt | r.r. | % RSM |
|-------|--------------------------|-------|------|-------|
| 1     | none                     | 15    | 5:1  | 37%   |

**General procedure:** In a nitrogen-filled glovebox, an oven-dried 4-mL vial equipped with a stir bar is charged with CuCl<sub>2</sub> (3.0 equiv, 0.30 mmol), Na<sub>3</sub>PO<sub>4</sub> (3.0 equiv, 0.30 mmol), CH<sub>2</sub>Cl<sub>2</sub> (1.0 mL, 0.10 M), (1-chloroethyl)benzene (1.0 equiv, 0.10 mmol), and anisole (3.0 equiv, 0.30 mmol). The vial is sealed, removed from the glovebox, and irradiated, with stirring, at 427 nm with a Kessil<sup>®</sup> PR160 lamp in a PhotoRedox Box. A fan is used to maintain the vial at room temperature. After 24 h, the crude reaction mixture is diluted with EtOAc and saturated aqueous NH<sub>4</sub>Cl. Yields are determined by <sup>1</sup>H NMR analysis using 1-methylnaphthalene (10 μL) as an internal standard.

**Table S27.** One-pot, one-step decarboxylation with alkyl and aromatic amines.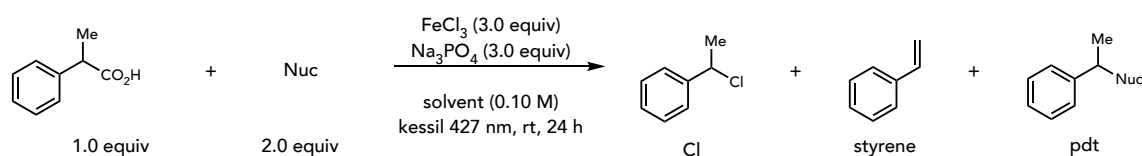

| entry | nucleophile          | solvent | % Cl | % styrene | % pdt |
|-------|----------------------|---------|------|-----------|-------|
| 1     | morpholine           | MeCN    | 59   | 20        | 0     |
| 2     | morpholine           | DMF     | 0    | 0         | 0     |
| 3     | morpholine           | DCM     | 54   | 1         | 0     |
| 4     | <i>p</i> -toluidine  | MeCN    | 31   | 1         | 4     |
| 5     | <i>p</i> -toluidine  | DMF     | 0    | 0         | 0     |
| 6     | <i>p</i> -toluidine  | DCM     | 0    | 0         | 20    |
| 7     | <i>n</i> -butylamine | MeCN    | 66   | 10        | 0     |
| 8     | <i>n</i> -butylamine | DMF     | 0    | 0         | 8     |
| 9     | <i>n</i> -butylamine | DCM     | 0    | 1         | 21    |
| 10    | 2-methylimidazole    | MeCN    | 41   | 0         | 0     |
| 11    | 2-methylimidazole    | DMF     | 0    | 0         | 0     |
| 12    | 2-methylimidazole    | DCM     | 15   | 1         | 14    |

**General procedure:** In a nitrogen-filled glovebox, an oven-dried 4-mL vial equipped with a stir bar is charged with  $\text{FeCl}_3$  (0.049 g, 3.0 equiv, 0.30 mmol),  $\text{Na}_3\text{PO}_4$  (0.049 g, 3.0 equiv, 0.30 mmol), the solvent (1.0 mL, 0.10 M), 2-phenylpropanoic acid (0.015 g, 1.0 equiv, 0.10 mmol), and the nucleophile (2.0 equiv). The vial is sealed, removed from the glovebox, and irradiated, with stirring, at 427 nm with a Kessil<sup>®</sup> PR160 lamp in a PhotoRedox Box. A fan is used to maintain the vial at room temperature. After 24 h, the crude reaction mixture is diluted with EtOAc and saturated aqueous  $\text{NH}_4\text{Cl}$ . Yields are determined by GC or  $^1\text{H}$  NMR analysis using 1-methylnaphthalene (10  $\mu\text{L}$ ) as an internal standard.

**Table S28.** Optimization of one-pot, two-step for alkyl and aromatic amines.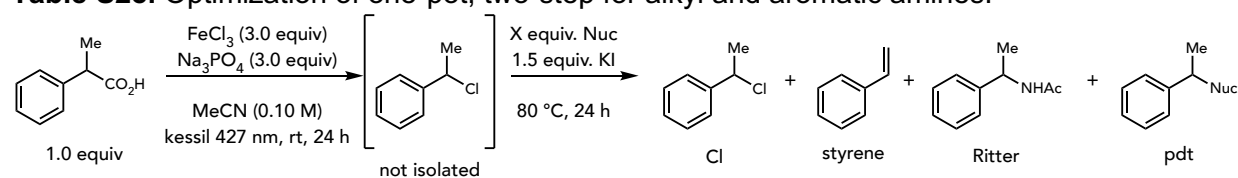

| entry | nucleophile          | workup                              | equiv nuc | Cl (%) | styrene (%) | Ritter (%) | pdt (%) |
|-------|----------------------|-------------------------------------|-----------|--------|-------------|------------|---------|
| 1     | morpholine           | celite plug                         | 5.0       | 9      | 0           | 0          | 57      |
| 2     | morpholine           | silica plug                         | 5.0       | 13     | 0           | 0          | 56      |
| 3     | morpholine           | no workup                           | 3.0       | 0      | 47          | 0          | 29      |
| 4     | morpholine           | no workup                           | 5.0       | 0      | 23          | 0          | 54      |
| 5     | morpholine           | no workup                           | 7.0       | 0      | 20          | 0          | 58      |
| 6     | morpholine           | no workup                           | 10        | 0      | 1           | 0          | 64      |
| 7     | <i>p</i> -toluidine  | no workup                           | 2.0       | 0      | 0           | 8          | 37      |
| 8     | <i>p</i> -toluidine  | no workup                           | 5.0       | 0      | 0           | 9          | 35      |
| 9     | <i>p</i> -toluidine  | no workup                           | 10        | 0      | 0           | 6          | 45      |
| 10    | <i>p</i> -toluidine  | NH <sub>4</sub> Cl wash             | 2.0       | 0      | 0           | 8          | 31      |
| 11    | <i>p</i> -toluidine  | K <sub>2</sub> CO <sub>3</sub> wash | 2.0       | 0      | 0           | 11         | 25      |
| 12    | 2-methylimidazole    | no workup                           | 3.0       | 0      | 0           | 36         | 1       |
| 13    | 2-methylimidazole    | no workup                           | 5.0       | 0      | 0           | 11         | 8       |
| 14    | 2-methylimidazole    | no workup                           | 7.0       | 4      | 0           | 6          | 31      |
| 15    | 2-methylimidazole    | no workup                           | 10        | 0      | 0           | 11         | 46      |
| 16    | <i>n</i> -butylamine | no workup                           | 3.0       | 0      | 4           | 16         | 11      |
| 17    | <i>n</i> -butylamine | no workup                           | 5.0       | 0      | 4           | 7          | 34      |
| 18    | <i>n</i> -butylamine | no workup                           | 7.0       | 0      | 2           | 10         | 51      |
| 19    | <i>n</i> -butylamine | no workup                           | 10        | 0      | 1           | 6          | 72      |

**General procedure:** In a nitrogen-filled glovebox, an oven-dried 4-mL vial equipped with a stir bar is charged with FeCl<sub>3</sub> (0.049 g, 3.0 equiv, 0.30 mmol), Na<sub>3</sub>PO<sub>4</sub> (0.049 g, 3.0 equiv, 0.30 mmol), MeCN (1.0 mL, 0.10 M), and 2-phenylpropanoic acid (0.015 g, 1.0 equiv, 0.10 mmol). The vial is sealed, removed from the glovebox, and irradiated, with stirring, at 427 nm with a Kessil® PR160 lamp in a PhotoRedox Box. A fan is used to maintain the vial at room temperature. After 24 h, the crude reaction mixture is subjected to the corresponding workup (see below), charged with the nucleophile (3.0–10 equiv) and KI (0.025 g, 1.5 equiv, 0.15 mmol), and heated at 80 °C. After 16 h, the reaction is diluted with EtOAc and saturated aqueous K<sub>2</sub>CO<sub>3</sub>. Yields are determined by GC or <sup>1</sup>H NMR analysis using 1-methylnaphthalene (10 μL) as an internal standard. **Celite plug workup:** The crude reaction is pushed through a small pad of celite to remove the majority of the solids. The celite pad is rinsed with an additional 0.50 mL of MeCN. **Silica plug workup:** The crude reaction is pushed through a small pad of silica to remove the solids. The silica pad is rinsed with an additional 0.50 mL of MeCN. **NH<sub>4</sub>Cl wash workup:** The crude reaction mixture is diluted with 1.5 mL diethyl ether and quenched with saturated aqueous NH<sub>4</sub>Cl. The organic layer is carefully removed with a glass pipette. The aqueous layer is washed 3x 1 mL with diethyl ether. The combined organic layers are concentrated under reduced pressure. MeCN (1.0 mL, 0.10 M) is then added. **K<sub>2</sub>CO<sub>3</sub> wash workup:** The crude reaction mixture is diluted with 1.5 mL diethyl ether and quenched with saturated aqueous K<sub>2</sub>CO<sub>3</sub>. The organic layer is carefully removed with a glass pipette. The aqueous layer is washed 3x1 mL with diethyl ether. The combined organic layers are concentrated under reduced pressure. MeCN (1.0 mL, 0.10 M) is then added. **No workup:** The crude reaction is directly charged with the nucleophile. No other manipulations performed.

**Table S29.** Optimization of one-pot, two-step for borylation.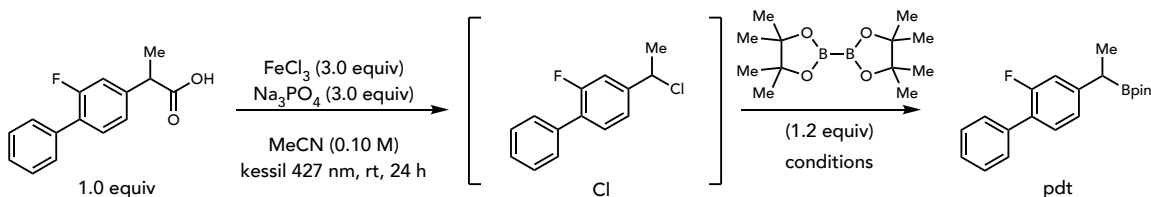

| entry | workup                                      | borylation conditions                                                                 | % pdt | % Cl |
|-------|---------------------------------------------|---------------------------------------------------------------------------------------|-------|------|
| 1     | no workup                                   | IPrCuCl (10 mol%), 1.2 equiv KOMe, THF (0.2 M), rt                                    | 0     | 78   |
| 2     | NH <sub>4</sub> Cl quench                   | IPrCuCl (10 mol%), 1.2 equiv KOMe, THF (0.2 M), rt                                    | 0     | 75   |
| 3     | Celite filtration                           | IPrCuCl (10 mol%), 1.2 equiv KOMe, THF (0.2 M), rt                                    | 0     | 73   |
| 4     | Celite filtration                           | IPrCuCl (10 mol%), 1.2 equiv KOMe, THF (0.2 M), 60 °C                                 | 0     | 61   |
| 5     | Celite filtration                           | IPrCuCl (10 mol%), 1.2 equiv KOMe, THF (0.2 M), 80 °C                                 | 0     | 59   |
| 6     | NH <sub>4</sub> Cl quench                   | CuCl (10 mol%), Xantphos (10 mol%), 1.2 equiv KO <sup>t</sup> -Bu, THF (0.2 M), rt    | 0     | 0    |
| 7     | NH <sub>4</sub> Cl quench, then silica plug | CuCl (10 mol%), Xantphos (10 mol%), 1.2 equiv KO <sup>t</sup> -Bu, THF (0.2 M), rt    | 55    | 0    |
| 8     | NH <sub>4</sub> Cl quench, then silica plug | CuCl (10 mol%), Xantphos (10 mol%), 1.2 equiv KO <sup>t</sup> -Bu, THF (0.2 M), 60 °C | 31    | 0    |

**General procedure:** An oven-dried 4-mL vial equipped with a stir bar is brought into a nitrogen-filled glovebox and charged with FeCl<sub>3</sub> (0.049 g, 3.0 equiv, 0.30 mmol), Na<sub>3</sub>PO<sub>4</sub> (0.049 g, 3.0 equiv, 0.30 mmol), flurbiprofen (0.024 g, 1.0 equiv, 0.10 mmol), and MeCN (1.0 mL, 0.10 M). The vial is sealed with a screwcap bearing a teflon septum, removed from the glovebox, and placed into a EvoluChem™ PhotoRedOx Box. Stirring at 800 rpm is engaged and the vial is irradiated at 427 nm with a 40 W Kessil™ lamp. After 24 h, the light is turned off, the vial is removed from the PhotoRedox Box, and subjected to the indicated workup to obtain the crude benzylic chloride intermediate.

A separate oven-dried 4-mL vial equipped with a stir bar is brought into a nitrogen-filled glovebox and charged with the Cu catalyst (10 mol%) and anhydrous THF (0.50 mL). The vial is next charged with bis(pinacolato)diboron (0.030 g, 1.2 equiv, 0.12 mmol) and the base (1.2 equiv) and swirled gently for ca. 5 min. Finally, the crude benzylic chloride from the first step is next added, the vial is sealed with a screwcap bearing a teflon septum, removed from the glovebox, and stirred at the indicated temperature. After 24 h, the crude reaction mixture is diluted with EtOAc and saturated aqueous NH<sub>4</sub>Cl. Yields are determined by GC or <sup>1</sup>H NMR analysis using 1-methylnaphthalene (10 μL) as an internal standard.

### C. Additional isolated substrate combinations

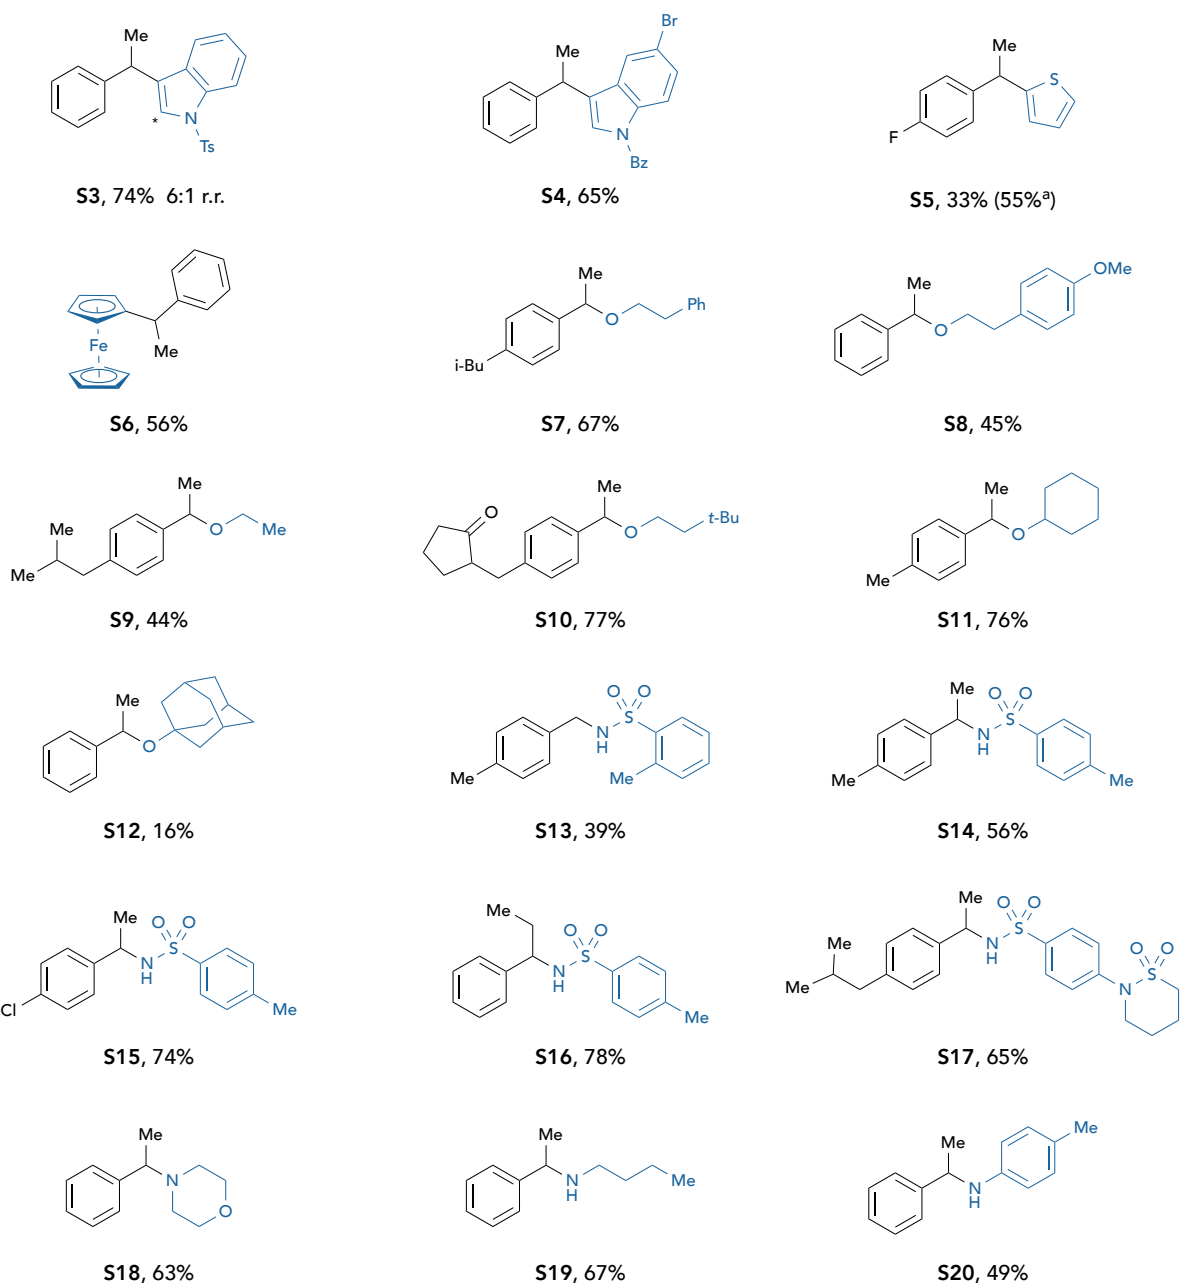

**Figure S2.** Additional cross-nucleophile products that were isolated and characterized. Reaction conditions are reported in the Experimental Procedures section of the SI. All yields are isolated unless otherwise noted. <sup>a</sup>Yields are determined by <sup>1</sup>H NMR analysis using 1-methylnaphthalene (10  $\mu$ L) as an internal standard.

## D. Substrate limitations

**Table S30.** Sterically hindered alcohols.

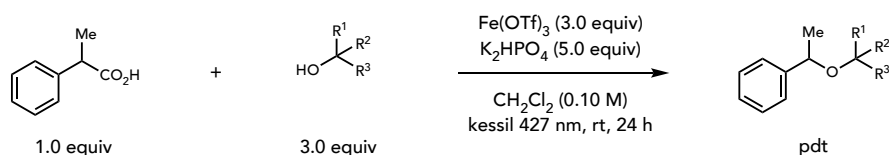

| entry | nuc | pdt | % pdt |
|-------|-----|-----|-------|
| 1     |     |     | 16*   |
| 2     |     |     | 0     |

**General procedure:** In a nitrogen-filled glovebox, an oven-dried 4-mL vial equipped with a stir bar is charged with  $\text{Fe}(\text{OTf})_3$  (3.0 equiv, 0.30 mmol),  $\text{K}_2\text{HPO}_4$  (5.0 equiv, 0.50 mmol),  $\text{CH}_2\text{Cl}_2$  (1.0 mL, 0.10 M), 2-phenylpropanoic acid (1.0 equiv, 0.10 mmol), and alcohol (3.0 equiv). The vial is sealed, removed from the glovebox, and irradiated, with stirring, at 427 nm with a Kessil® PR160 lamp in a PhotoRedox Box. A fan is used to maintain the vial at room temperature. After 24 h, the crude reaction mixture is diluted with EtOAc and saturated aqueous  $\text{NH}_4\text{Cl}$ . Yields are determined by  $^1\text{H}$  NMR analysis using 1-methylnaphthalene (10  $\mu\text{L}$ ) as an internal standard unless otherwise noted. \*Isolated yield.

**Table S31.** Primary aliphatic carboxylic acid.

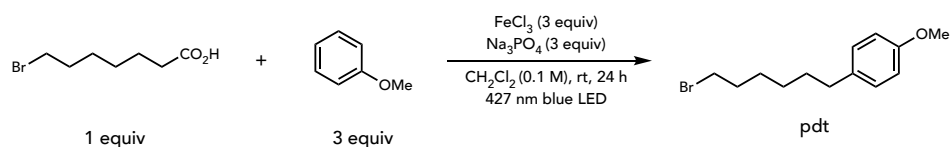

| entry | % pdt | % RSM |
|-------|-------|-------|
| 1     | 0     | 100   |

**General procedure:** In a nitrogen-filled glovebox, an oven-dried 4-mL vial equipped with a stir bar is charged with  $\text{FeCl}_3$  (0.049 g, 3.0 equiv, 0.30 mmol),  $\text{Na}_3\text{PO}_4$  (0.049 g, 3.0 equiv, 0.30 mmol), the dichloromethane (1.0 mL, 0.10 M), 7-bromoheptanoic acid (0.021 g, 1.0 equiv, 0.10 mmol), and the anisole (0.033 mL, 3.0 equiv, 0.3 mmol). The vial is sealed, removed from the glovebox, and irradiated, with stirring, at 427 nm with a Kessil® PR160 lamp in a PhotoRedox Box. A fan is used to maintain the vial at room temperature. After 24 h, the crude reaction mixture is diluted with EtOAc and 1M HCl. Yields are determined by  $^1\text{H}$  NMR analysis using 1-methylnaphthalene (10  $\mu\text{L}$ ) as an internal standard.



**Table S32.** Secondary aliphatic carboxylic acid.

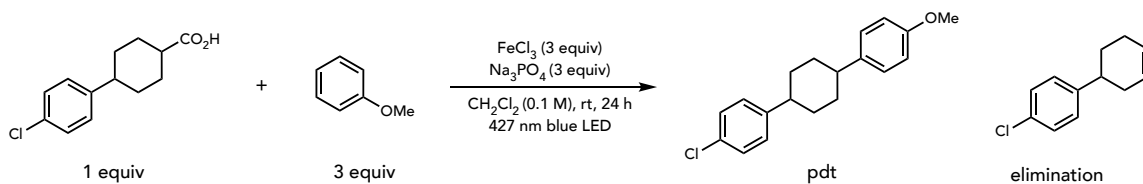

| entry | % pdt | % RSM | % elimination |
|-------|-------|-------|---------------|
| 1     | 0     | 86    | 4             |

**General procedure:** In a nitrogen-filled glovebox, an oven-dried 4-mL vial equipped with a stir bar is charged with  $\text{FeCl}_3$  (0.049 g, 3.0 equiv, 0.30 mmol),  $\text{Na}_3\text{PO}_4$  (0.049 g, 3.0 equiv, 0.30 mmol), the dichloromethane (1.0 mL, 0.10 M), 4-(4-chlorophenyl)cyclohexane-1-carboxylic acid (0.024 g, 1.0 equiv, 0.10 mmol), and the anisole (0.033 mL, 3.0 equiv, 0.3 mmol). The vial is sealed, removed from the glovebox, and irradiated, with stirring, at 427 nm with a Kessil® PR160 lamp in a PhotoRedox Box. A fan is used to maintain the vial at room temperature. After 24 h, the crude reaction mixture is diluted with EtOAc and 1M HCl. Yields are determined by  $^1\text{H}$  NMR analysis using 1-methylnaphthalene (10  $\mu\text{L}$ ) as an internal standard.

**Figure S3.** Other unsuccessful substrates.

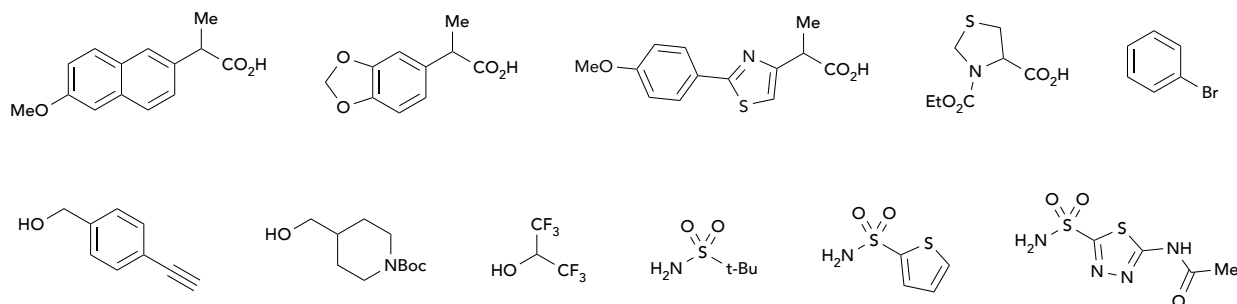

**E. Photo of laboratory set up for isolation reactions:**

**Figure S4.** Vials are irradiated at 427 nm with two 40 W Kessil Lamp PR160 lamps at a distance of 10 cm.

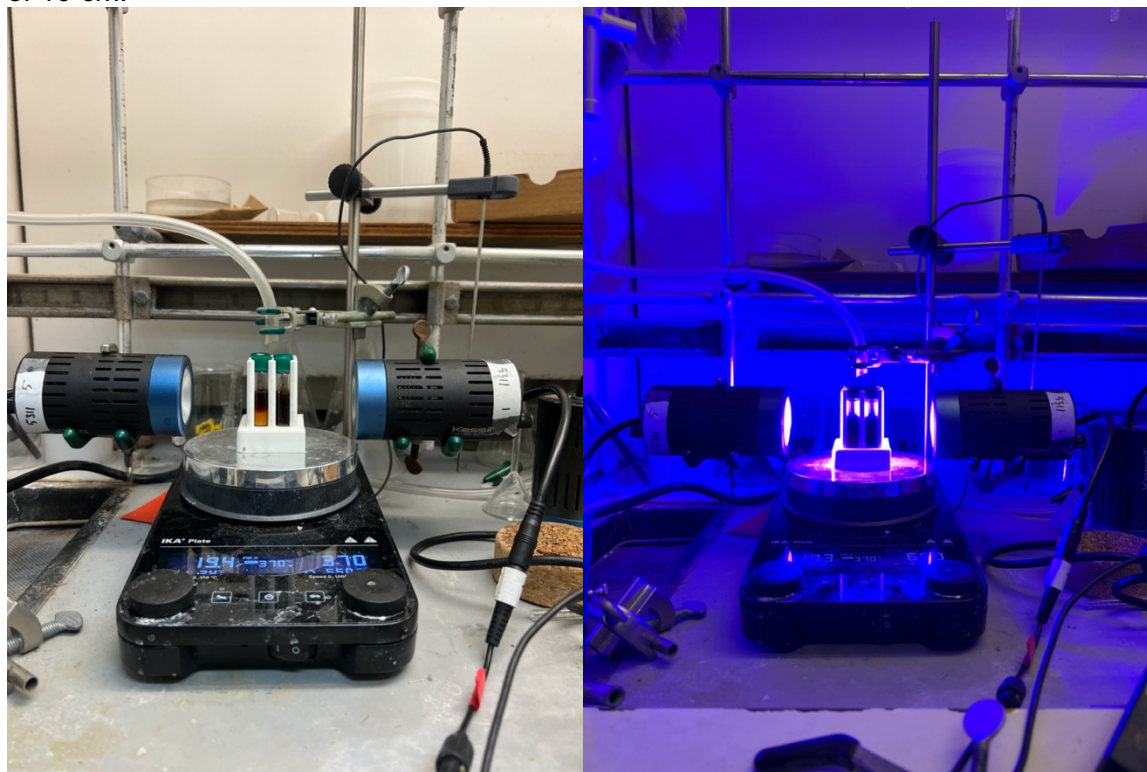

## F. Analysis of alkyl building blocks from commercial vendors

**Table S33.** The number of commercially available building blocks.

| Structure of Fragment                                                               | Combi-Blocks  | Alfa Chemistry | Ambeed        |
|-------------------------------------------------------------------------------------|---------------|----------------|---------------|
| 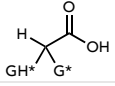   | 18,873        | 17,109         | 15,624        |
|    | 2,195         | 1,741          | 1,974         |
| <b>R–COOH sum</b>                                                                   | <b>21,068</b> | <b>18,850</b>  | <b>17,598</b> |
|    | 16,611        | 20,498         | 14,775        |
|    | 2,028         | 3,134          | 1,779         |
| <b>R–OH sum</b>                                                                     | <b>18,639</b> | <b>23,632</b>  | <b>16,654</b> |
|    | 16,556        | 11,048         | 15,224        |
|    | 1,147         | 772            | 1,180         |
| <b>R–NH2 sum</b>                                                                    | <b>17,703</b> | <b>11,820</b>  | <b>16,404</b> |
|   | 5,253         | 4,667          | 5,214         |
|  | 452           | 964            | 299           |
| <b>R–Cl sum</b>                                                                     | <b>5,705</b>  | <b>5,631</b>   | <b>5,513</b>  |
|  | 3,564         | 2,927          | 3,861         |
|  | 325           | 377            | 193           |
| <b>R–Br sum</b>                                                                     | <b>3,889</b>  | <b>3,304</b>   | <b>4,054</b>  |
|  | 422           | 182            | 298           |
|  | 47            | 3              | 18            |
| <b>R–I sum</b>                                                                      | <b>469</b>    | <b>185</b>     | <b>316</b>    |
|  | 382           | 572            | 206           |
|  | 9             | 63             | 11            |
| <b>R–[B]</b>                                                                        | <b>391</b>    | <b>635</b>     | <b>217</b>    |

The number of commercially available building blocks was analyzed with Reaxy based on the fragments drawn below. Under the Commercial Substances filter, the fragments were counted by vendor through the Commercial Suppliers tab. The number of compounds from Combi-Blocks, Alfa Chemistry, and Ambeed was recorded for each part structure. The search identified primary and secondary building blocks separate from tertiary, therefore, the sum of both searches was calculated and reported. Data collected on Dec. 8, 2022.

## G. Evidence for decarboxylative triflation

**Figure S5.** GC-MS trace of proposed benzylic triflate intermediate.

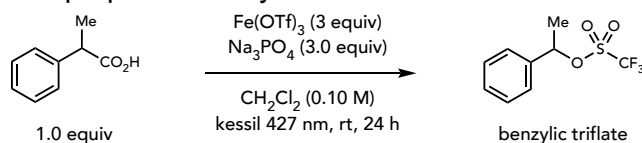

**Operational notes:** In a nitrogen-filled glovebox, an oven-dried 4-mL vial equipped with a stir bar is charged with Fe(OTf)<sub>3</sub> (3.0 equiv, 0.30 mmol), Na<sub>3</sub>PO<sub>4</sub> (3.0 equiv, 0.30 mmol), CH<sub>2</sub>Cl<sub>2</sub> (1.0 mL, 0.10 M), and 2-phenylpropanoic acid (1.0 equiv, 0.10 mmol). The vial is sealed, removed from the glovebox, and irradiated, with stirring, at 427 nm with a Kessil® PR160 lamp in a PhotoRedox Box. A fan is used to maintain the vial at room temperature. After 24 h, the crude reaction mixture is filtered through a plug of celite and analyzed by gas chromatography-mass spectrometry using 1-methylnaphthalene (10 μL) as an internal standard.

**Figure S6.** Gas chromatogram of the reaction.

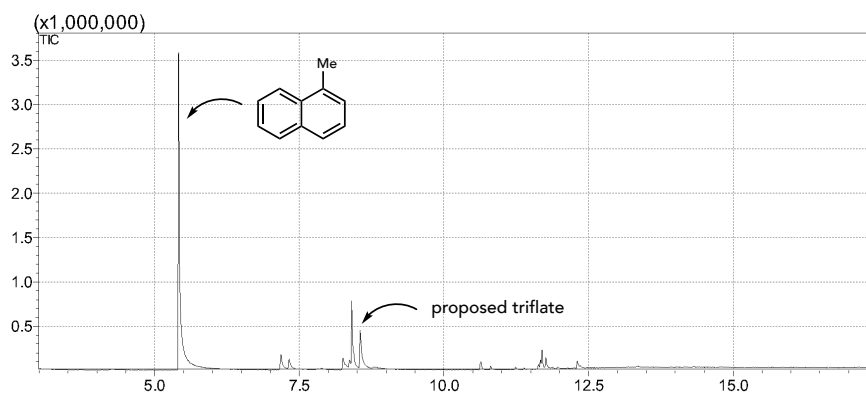

**Figure S7.** Mass spectrum of proposed triflate at a retention time of 8.5.

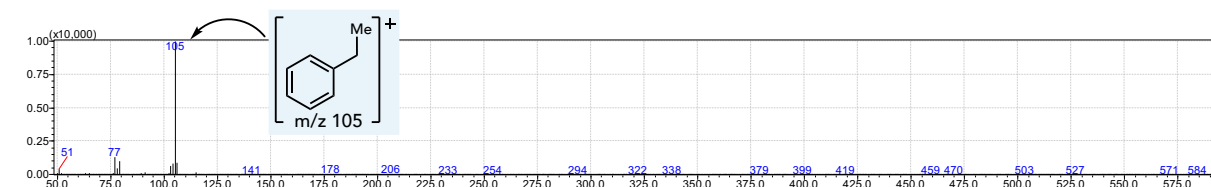

Comment: Major ion observed is the benzylic fragment.

**Figure S8.** Zoomed mass spectrum of proposed triflate at a retention time of 8.5.

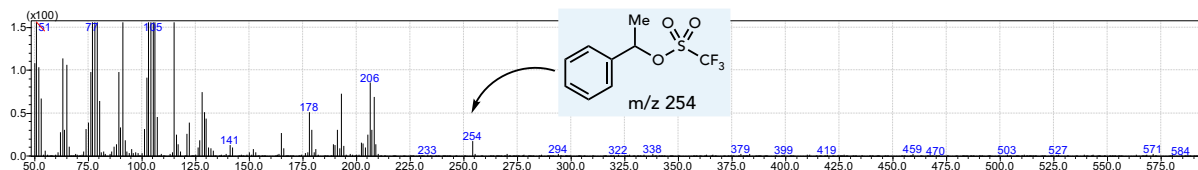

Comment: When zooming in significantly on the mass spectrum at 8.5, 254 is observed. The benzylic triflate is our best explanation for this peak as the retention time and fragmentation pattern do not match any of the known by-products commonly formed in the absence of the nucleophile. This is consistent with the instability of benzylic triflates, for which we propose rapid fragmentation to the benzylic fragment (m/z 105).

## H. UV-Vis experiments

**Figure S9.** Absorption spectra of FeCl<sub>3</sub>, 2-phenylpropanoic acid (**1**), anisole (**2**), and NaOAc (**B**) dissolved in CH<sub>2</sub>Cl<sub>2</sub>. The spectra were all recorded in quartz tubes under ambient conditions.

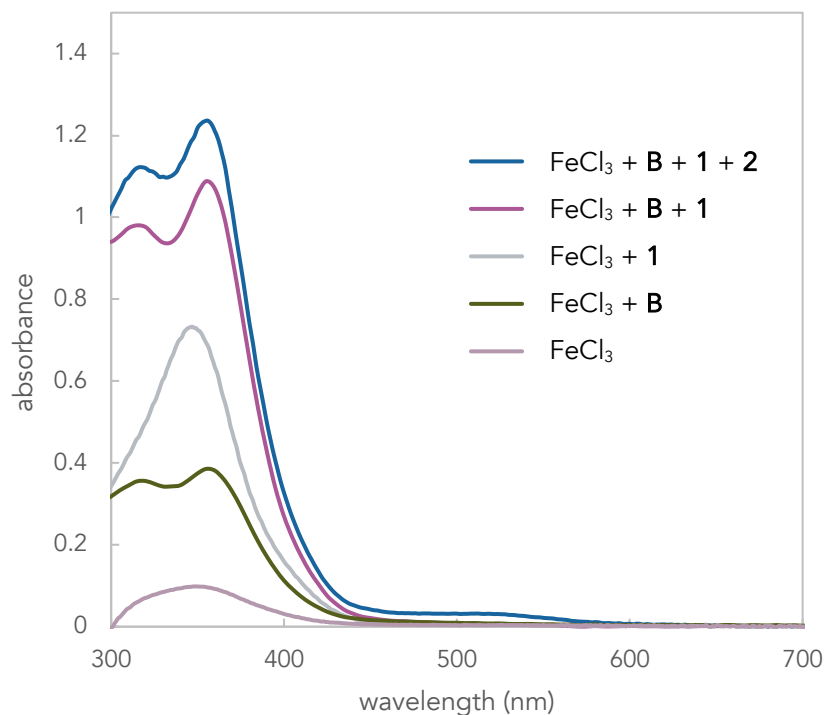

**Operational notes:** The solutions were prepared in a nitrogen-filled glovebox at reaction stoichiometry: FeCl<sub>3</sub> (0.049 g, 0.30 mmol), NaOAc (0.025 g, 0.30 mmol), dichloromethane (1.0 mL, 0.10 M), 2-phenylpropanoic acid (0.015 g, 0.10 mmol), and anisole (0.033 mL, 0.30 mmol). The vials were sealed, removed from the glovebox, and stirred for 30 minutes. The solutions were filtered through a syringe filter to remove the undissolved iron and base. 0.070 mL of the filtered solution was added to a cuvette and diluted with 3.0 mL dichloromethane ( $2 \cdot 10^{-3}$  M). To obtain the reported absorbance spectra, the prepared solution underwent a serial dilution where 1.0 mL of the solution was diluted to 3.0 mL with dichloromethane, three times. The approximate concentration of the analyzed solutions is  $8 \cdot 10^{-5}$  M.

**Figure S10.** Absorption spectra of  $\text{Fe}(\text{OTf})_3$ , 2-phenylpropanoic acid (**1**), anisole (**2**), and NaOAc (**B**) dissolved in  $\text{CH}_2\text{Cl}_2$ . The spectra were all recorded in quartz tubes under ambient conditions.

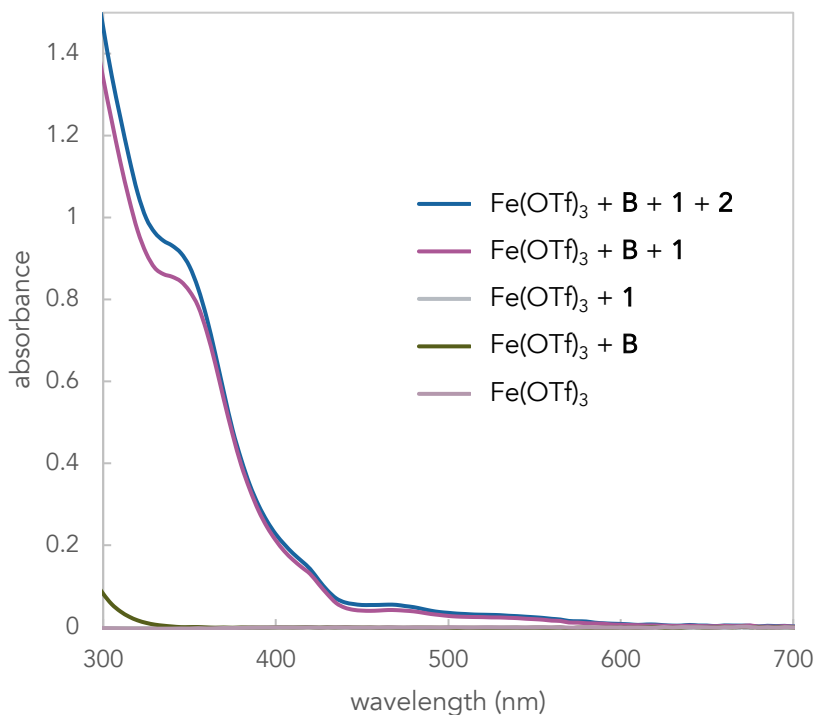

**Operational notes:** The solutions were prepared in a nitrogen-filled glovebox at reaction stoichiometry:  $\text{Fe}(\text{OTf})_3$  (0.151 g, 0.30 mmol), NaOAc (0.025 g, 0.30 mmol), dichloromethane (1.0 mL, 0.10 M), 2-phenylpropanoic acid (0.015 g, 0.10 mmol), and anisole (0.033 mL, 0.30 mmol). The vials were sealed, removed from the glovebox, and stirred for 30 minutes. The solutions were filtered through a syringe filter to remove the undissolved iron and base. 0.070 mL of the filtered solution was added to a cuvette and diluted with 3.0 mL dichloromethane ( $2 \cdot 10^{-3}$  M).

**Figure S11.** Absorption spectra of 2-phenylpropanoic acid (**1**), anisole (**2**), and NaOAc (**B**) dissolved in CH<sub>2</sub>Cl<sub>2</sub>. The spectra were all recorded in quartz tubes under ambient conditions.

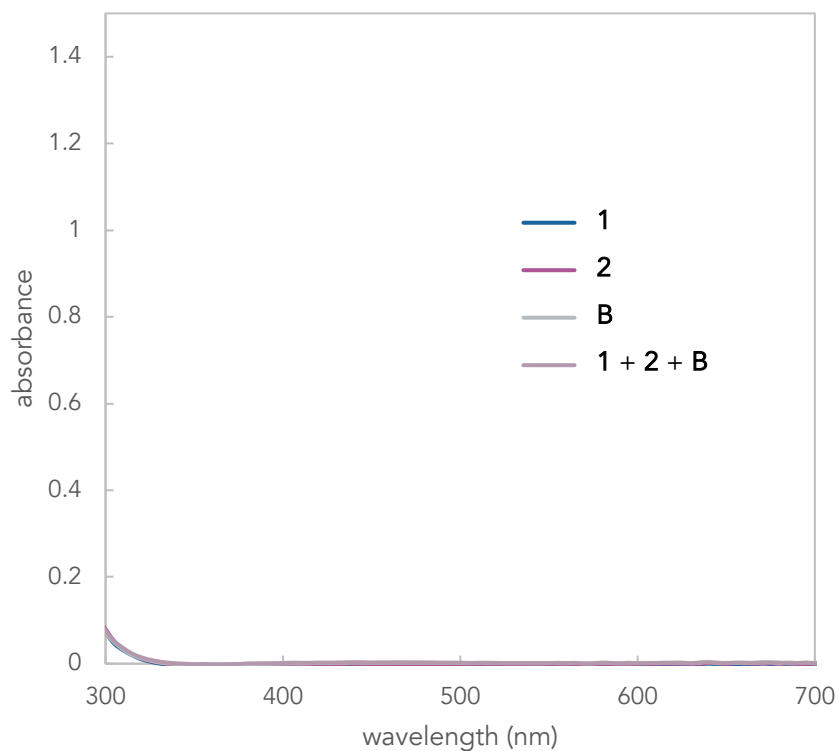

**Operational notes:** The solutions were prepared in a nitrogen-filled glovebox at reaction stoichiometry: NaOAc (0.025 g, 0.30 mmol), dichloromethane (1.0 mL, 0.10 M), 2-phenylpropanoic acid (0.015 g, 0.10 mmol), and anisole (0.033 mL, 0.30 mmol). The vials were sealed, removed from the glovebox, and stirred for 30 minutes. The solutions were filtered through a syringe filter to remove the undissolved iron and base. 0.070 mL of the filtered solution was added to a cuvette and diluted with 3.0 mL dichloromethane ( $2 \cdot 10^{-3}$  M).

## I. Substrate Preparation

### 4-chloro-2-phenylbutanoic acid<sup>2</sup> (S1)

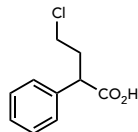

A flame-dried round-bottomed flask was equipped with a stirbar and charged with phenyl acetic acid (0.681 g, 1 equiv, 5 mmol) and placed under N<sub>2</sub>. Anhydrous THF (20 mL, 0.25 M) was added and the solution was cooled to -78 °C. *n*-BuLi (2.5 M in hexane, 4 mL, 2 equiv, 10 mmol) was added dropwise to the solution. The mixture was allowed to warm to 0 °C and was stirred for 1 h. 1-Bromo-2-chloroethane (0.42 mL, 1 equiv, 5 mmol) was added and the reaction was allowed to warm to room temperature over 16 hours. The reaction mixture was quenched with the addition of aqueous HCl (1 M, 25 mL). The aqueous phase was extracted with EtOAc (3 x 25 mL) and the combined organic fractions were dried over MgSO<sub>4</sub>, filtered through a plug of celite, and concentrated under reduced pressure to give a pale yellow solid (0.815 g, 82% yield). The crude product was analytically pure and used without further purification. The spectral data matched those previously reported.<sup>2</sup> <sup>1</sup>H NMR (400 MHz, Chloroform-*d*) δ 7.40 – 7.27 (m, 5H), 3.99 – 3.87 (m, 1H), 3.55 (dt, *J* = 11.5, 5.9 Hz, 1H), 3.37 (ddd, *J* = 11.1, 8.2, 5.3 Hz, 1H), 2.61 – 2.43 (m, 1H), 2.24 (dddd, *J* = 14.5, 8.3, 6.3, 5.3 Hz, 1H).

### Tosylproline (S2)

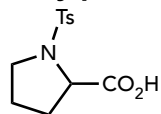

L-Proline (0.460 g, 1 equiv, 4.0 mmol) was dissolved in 1.5 M aqueous NaOH (6.5 mL). Sulfonyl chloride (0.915 g, 1.2 equiv, 4.8 mmol) was added in Et<sub>2</sub>O (4 mL) and the resulting mixture was stirred overnight at room temperature. Concentrated HCl was added dropwise to the solution until the pH = 2. The organic layer was separated, and the aqueous layer was extracted with ether (3 x 10 mL). The combined organic fractions were dried over Na<sub>2</sub>SO<sub>4</sub> and concentrated under reduced pressure. The crude product was recrystallized (DCM/hexanes) to afford a white solid (0.932 g, 86% yield). The spectral data matched those previously reported.<sup>3</sup> <sup>1</sup>H NMR (400 MHz, Chloroform-*d*) δ 7.77 (d, *J* = 8.3 Hz, 2H), 7.35 (d, *J* = 8.0 Hz, 2H), 4.25 (dd, *J* = 8.3, 3.5 Hz, 1H), 3.59 – 3.47 (m, 1H), 3.32 – 3.11 (m, 1H), 2.45 (s, 3H), 2.24 – 2.11 (m, 1H), 2.01 – 1.84 (m, 2H), 1.81 – 1.57 (m, 1H).



## J. Experimental procedures, isolation, and characterization

### General Procedure A:

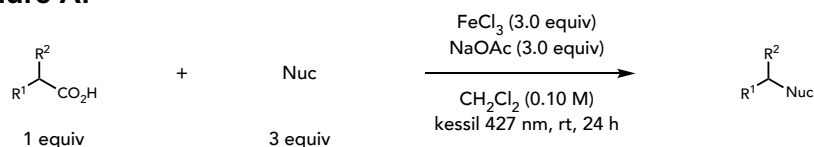

An oven-dried 6-mL vial equipped with a stir bar is brought into a nitrogen-filled glovebox and charged with FeCl<sub>3</sub> (3.0 equiv), NaOAc (3.0 equiv), the carbon nucleophile (3.0 equiv), the carboxylic acid (1.0 equiv), and methylene chloride (0.10 M). The vial is sealed with a screwcap bearing a teflon septum, removed from the glovebox, and placed on a stir plate. The vial is irradiated at 427 nm with two 40 W Kessil Lamp PR160 lamps at a distance of 10 cm with stirring at 800 rpm. A fan is used to maintain the vial at room temperature. After 24 h, the crude reaction mixture is diluted with 1.5 mL EtOAc and absorbed directly on diatomaceous earth (Celite®). The product is purified by flash chromatography.

### General Procedure B:

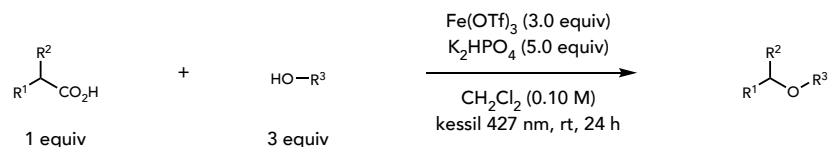

An oven-dried 6-mL vial equipped with a stir bar is brought into a nitrogen-filled glovebox and charged with Fe(OTf)<sub>3</sub> (0.453 g, 3.0 equiv, 0.9 mmol), K<sub>2</sub>HPO<sub>4</sub> (0.261 g, 5.0 equiv, 1.5 mmol), the alcohol nucleophile (3.0 equiv, 0.9 mmol), the carboxylic acid (1.0 equiv, 0.3 mmol), and methylene chloride (3.0 mL, 0.10 M). The vial is sealed with a screwcap bearing a teflon septum, removed from the glovebox, and placed on a stir plate. The vial is irradiated at 427 nm with two 40 W Kessil Lamp PR160 lamps at a distance of 10 cm with stirring at 800 rpm. A fan is used to maintain the vial at room temperature. After 24 h, the crude reaction mixture is diluted with 1.5 mL EtOAc and absorbed directly on diatomaceous earth (Celite®). The product is purified by flash chromatography on silica gel.

### General Procedure C:

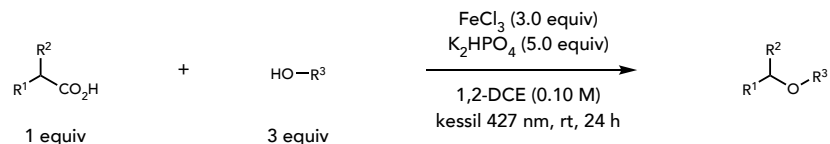

An oven-dried 6-mL vial equipped with a stir bar is brought into a nitrogen-filled glovebox and charged with FeCl<sub>3</sub> (0.146 g, 3.0 equiv, 0.9 mmol), K<sub>2</sub>HPO<sub>4</sub> (0.261 g, 5.0 equiv, 1.5 mmol), the alcohol nucleophile (3.0 equiv, 0.9 mmol), the carboxylic acid (1.0 equiv, 0.3 mmol), and 1,2-dichloroethane (3.0 mL, 0.10 M). The vial is sealed with a screwcap bearing a teflon septum, removed from the glovebox, and placed on a stir plate. The vial is irradiated at 427 nm with two 40 W Kessil Lamp PR160 lamps at a distance of 10 cm with stirring at 800 rpm. A fan is used to maintain the vial at room temperature. After 24 h, the crude reaction mixture is diluted with 1.5 mL EtOAc and absorbed directly on diatomaceous earth (Celite®). The product is purified by flash chromatography on silica gel.

### General Procedure D:

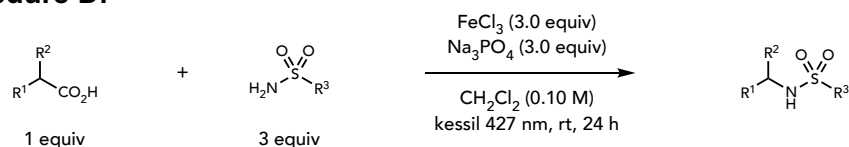

In a nitrogen-filled glovebox, an oven-dried 6-mL vial equipped with a stir bar is charged with  $\text{FeCl}_3$  (0.097 g, 3.0 equiv, 0.60 mmol),  $\text{Na}_3\text{PO}_4$  (0.098 g, 3.0 equiv, 0.60 mmol), the carboxylic acid (1.0 equiv, 0.20 mmol), the sulfonamide (3.0 equiv, 0.60 mmol), and methylene chloride (2.0 mL, 0.10 M). The vial is sealed, removed from the glovebox, and irradiated at 427 nm with two 40 W Kessil Lamp PR160 lamps at a distance of 10 cm with stirring at 1000 rpm. A fan is used to maintain the vial at room temperature. After 24 h, the crude reaction mixture is diluted with 1.5 mL EtOAc and adsorbed directly on diatomaceous earth (Celite®). The product is purified by flash chromatography on silica gel, eluting with mixtures of ethyl acetate in hexanes.

### General Procedure E:

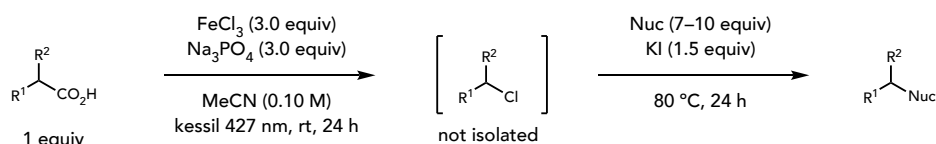

In a nitrogen-filled glovebox, an oven-dried 4-mL vial equipped with a stir bar is charged with  $\text{FeCl}_3$  (0.049 g, 3.0 equiv, 0.30 mmol),  $\text{Na}_3\text{PO}_4$  (0.049 g, 3.0 equiv, 0.30 mmol), MeCN (1.0 mL, 0.10 M), and the carboxylic acid (1.0 equiv, 0.10 mmol). The vial is sealed, removed from the glovebox, and irradiated, with stirring, at 427 nm with a Kessil® PR160 lamp in a PhotoRedox Box. A fan is used to maintain the vial at room temperature. After 24 h, the cap is removed, and the crude mixture is directly charged with the amine nucleophile (7.0–10 equiv, 0.70–1.0 mmol) and KI (0.025 g, 1.5 equiv, 0.15 mmol). The vial is resealed and heated, with stirring, at 80 °C for 16 h. The crude reaction mixture is diluted with 1.5 mL EtOAc and adsorbed directly on diatomaceous earth (Celite®). The product is purified by flash chromatography on silica gel, eluting with mixtures of ethyl acetate in hexanes.

### 1-methoxy-4-(1-phenylethyl)benzene (3)

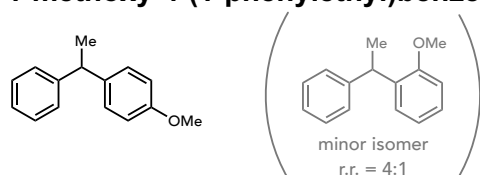

Prepared according to **General Procedure A** with anisole (65.1  $\mu\text{L}$ , 3.0 equiv, 0.60 mmol) and 2-phenylpropanoic acid (0.030 g, 1.0 equiv, 0.20 mmol). Purification by flash chromatography on silica gel, eluting with 2.5% ethyl acetate in hexanes, afforded a mixture of the two isomeric products as a clear oil (40 mg, 94% yield, 4:1 *para:ortho*). The spectral data matched that previously reported.<sup>4</sup> *Where resolved, signals for the minor isomer are given in brackets.* **<sup>1</sup>H NMR** (500 MHz,  $\text{CDCl}_3$ )  $\delta$  7.34 – 7.24 (m, 2H), 7.24 – 7.18 (m, 3H), 7.15 (d,  $J$  = 8.6 Hz, 2H), 6.84 (d,  $J$  = 8.6 Hz, 2H), [4.59 (q,  $J$  = 7.3 Hz, 0.25H)], 4.12 (q,  $J$  = 7.3 Hz, 1H), 3.79 (s, 3H), [3.78 (s, 0.75H)], 1.63 (d,  $J$  = 7.3 Hz, 3H), [1.59 (d,  $J$  = 7.3 Hz, 0.75H)]. **<sup>13</sup>C NMR** (126 MHz,  $\text{CDCl}_3$ )  $\delta$  157.98, [156.98], 146.92, [146.53], 138.70, [135.06], 128.65, 128.47, [128.22], [127.86], [127.80], 127.67,

[127.18], 126.07, [125.80], [120.64], 113.87, [110.74], [55.57], 55.38, 44.08, [37.53], 22.20, [21.02]. **HRMS** (FTMS + p ESI)  $m/z$ :  $[M-H]^-$  calculated for  $C_{15}H_{15}O$ , 211.1117; found, 211.117.

#### 1-methyl-4-(1-phenylethyl)benzene (4)

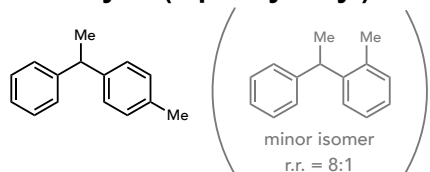

Prepared according to **General Procedure A** with toluene (213  $\mu$ L, 10 equiv, 1.0 mmol) and 2-phenylpropanoic acid (0.030 g, 1.0 equiv, 0.20 mmol). Purification by flash chromatography on silica gel, eluting with 0–5% ethyl acetate in hexanes, afforded a mixture of the two isomeric products as a clear oil (30.9 mg, 79% yield, 8:1 *para:ortho*). The spectral data matched those previously reported.<sup>5</sup> *Where resolved, signals for the minor isomer are given in brackets.* **<sup>1</sup>H NMR** (500 MHz,  $CDCl_3$ )  $\delta$  7.32 – 7.04 (m, 11.62H), [4.32 (q,  $J$  = 7.2 Hz, 0.12H)], 4.12 (q,  $J$  = 7.2 Hz, 1H), [2.31 (s, 0.36H)], 2.31 (s, 3H), 1.62 (d,  $J$  = 7.2 Hz, 3H), [1.61 (d,  $J$  = 7.2 Hz, 0.36H)]. **<sup>13</sup>C NMR** (126 MHz,  $CDCl_3$ )  $\delta$  146.75, [146.38], 143.56, [142.59], 135.63, 129.19, [128.89], [128.53], 128.47, [128.45], [127.82], [127.74], 127.71, 127.63, [126.90], [126.22], 126.08, [125.95], 44.51, [40.72], [24.01], 22.06, 21.11, [19.13]. **HRMS** (FTMS + p ESI)  $m/z$ :  $[M-H]^-$  calculated for  $C_{15}H_{15}$ , 195.1168; found, 195.1168.

#### 4-(1-(*p*-tolyl)ethyl)-1,1'-biphenyl (5)

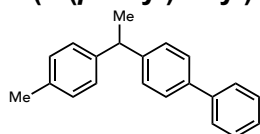

Prepared according to **General Procedure A** with biphenyl (0.463 g, 10 equiv, 3.0 mmol) and  $\alpha$ -4-dimethylphenylacetic acid (0.049 g, 1.0 equiv, 0.30 mmol). Purification by flash chromatography on silica gel, eluting with 0–5% ethyl acetate in hexanes, afforded the product as a clear oil (60 mg, 74% yield). **<sup>1</sup>H NMR** (500 MHz, Chloroform-*d*)  $\delta$  7.58 – 7.53 (m, 2H), 7.53 – 7.48 (m, 2H), 7.43 – 7.39 (m, 2H), 7.34 – 7.26 (m, 3H), 7.18 – 7.08 (m, 4H), 4.16 (q,  $J$  = 7.2 Hz, 1H), 2.31 (s, 3H), 1.66 (d,  $J$  = 7.2 Hz, 3H). **<sup>13</sup>C NMR** (126 MHz,  $CDCl_3$ )  $\delta$  145.90, 143.46, 141.20, 139.03, 135.74, 129.26, 128.84, 128.10, 127.64, 127.24, 127.16, 127.16, 44.23, 22.07, 21.13. **HRMS** (FTMS + p ESI)  $m/z$ :  $[M+H]^+$  calculated for  $C_{21}H_{21}$ , 273.1638; found, 273.1636.

#### 1-methyl-4-(1-phenylethyl)benzene (6)

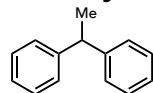

Prepared according to **General Procedure A** with benzene (357  $\mu$ L, 20 equiv, 2.0 mmol) and 2-phenylpropanoic acid (0.030 g, 1.0 equiv, 0.20 mmol). The crude reaction mixture was purified by reverse phase flash chromatography over C18 functionalized silica, eluting with a slow gradient of 0–100% with  $H_2O/MeOH$ . The product eluted at ~90% MeOH. Product-containing fractions were combined, diluted with EtOAc, and washed with brine (1x). The aqueous layer was washed with EtOAc (3x). The combined organic layers were dried over  $MgSO_4$ , filtered, and concentrated under reduced pressure to afford the product as a clear oil (15.0 mg, 41% yield). The spectral data matched those previously reported.<sup>5</sup> **<sup>1</sup>H NMR** (500 MHz,  $CDCl_3$ )  $\delta$  7.35 – 7.27 (m, 4H), 7.25 – 7.21 (m, 4H), 7.21 – 7.13 (m, 2H), 4.16 (q,  $J$  = 7.3 Hz, 1H), 1.65 (d,  $J$  = 7.3 Hz, 3H). **<sup>13</sup>C NMR** (126 MHz,  $CDCl_3$ )  $\delta$  146.52, 128.50, 127.77, 126.16, 44.92, 22.00. **HRMS** (FTMS + p ESI)  $m/z$ :  $[M-H]^-$  calculated for  $C_{14}H_{13}$ , 181.1012; found, 181.1011.

### 1-fluoro-4-(1-phenylethyl)benzene (7)

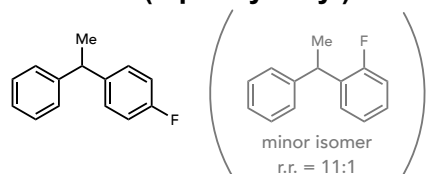

Prepared according to **General Procedure A** with fluorobenzene (942  $\mu\text{L}$ , 50 equiv, 5.0 mmol) and 2-phenylpropanoic acid (0.030 g, 1.0 equiv, 0.20 mmol). The crude reaction mixture was purified by reverse phase flash chromatography over C18 functionalized silica, eluting with a slow gradient of 0–100% with  $\text{H}_2\text{O}/\text{MeOH}$ . The product eluted at  $\sim 90\%$  MeOH. Product-containing fractions were combined, diluted with EtOAc, and washed with brine (1x). The aqueous layer was washed with EtOAc (3x). The combined organic layers were dried over  $\text{MgSO}_4$ , filtered, and concentrated under reduced pressure to afford a mixture of the two isomeric products as a clear oil (19.2 mg, 48% yield, 11:1 *para:ortho*). The spectral data matched those previously reported.<sup>5</sup> *Where resolved, signals for the minor isomer are given in brackets.*  **$^1\text{H NMR}$**  (500 MHz,  $\text{CDCl}_3$ )  $\delta$  7.31 – 7.27 (m, 2.54H), 7.23 – 7.11 (m, 5.27H), 6.96 (t,  $J = 8.7$  Hz, 2H), [4.48 (q,  $J = 7.3$  Hz, 0.09H)], 4.14 (q,  $J = 7.3$  Hz, 1H), [1.64 (d,  $J = 7.3$  Hz, 0.27H)], 1.62 (d,  $J = 7.2$  Hz, 3H).  **$^{13}\text{C NMR}$**  (126 MHz,  $\text{CDCl}_3$ )  $\delta$  161.41 (d,  $J = 244.1$  Hz), 146.32, 142.19 (d,  $J = 3.2$  Hz), 129.12 (d,  $J = 7.8$  Hz), 128.58, 127.66, 126.30, 115.21 (d,  $J = 21.1$  Hz), 44.18, 22.15.  **$^{19}\text{F NMR}$**  (377 MHz,  $\text{CDCl}_3$ )  $\delta$  -117.52 (s, 1F), -117.88 (s, 0.09F). **HRMS** (FTMS + p ESI)  $m/z$ :  $[\text{M}-\text{H}]^-$  calculated for  $\text{C}_{14}\text{H}_{12}\text{F}$ , 199.0918; found, 199.0917.

### 1-chloro-4-(1-phenylethyl)benzene (8)

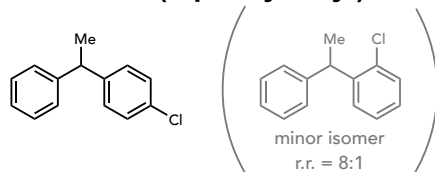

Prepared according to **General Procedure A** with chlorobenzene (1.01 mL, 50 equiv, 5.0 mmol) and 2-phenylpropanoic acid (0.030 g, 1.0 equiv, 0.20 mmol). The crude reaction mixture was purified by reverse phase flash chromatography over C18 functionalized silica, eluting with a slow gradient of 0–100% with  $\text{H}_2\text{O}/\text{MeOH}$ . The product eluted at  $\sim 90\%$  MeOH. Product-containing fractions were combined, diluted with EtOAc, and washed with brine (1x). The aqueous layer was washed with EtOAc (3x). The combined organic layers were dried over  $\text{MgSO}_4$ , filtered, and concentrated under reduced pressure to afford a mixture of the two isomeric products as a clear oil (5.6 mg, 12% yield, 8:1 *para:ortho*). The spectral data matched those previously reported.<sup>6</sup> *Where resolved, signals for the minor isomer are given in brackets.*  **$^1\text{H NMR}$**  (500 MHz,  $\text{CDCl}_3$ )  $\delta$  [7.37 – 7.32 (m, 0.52H)], 7.31 – 7.26 (m, 2.26H), 7.24 (d,  $J = 8.5$  Hz, 2H), 7.22 – 7.17 (m, 3.39H), 7.14 (d,  $J = 8.5$  Hz, 2H), [4.65 (q,  $J = 7.2$  Hz, 0.13H)], 4.12 (q,  $J = 7.2$  Hz, 1H), 1.62 (d,  $J = 7.2$  Hz, 3.39H).  **$^{13}\text{C NMR}$**  (126 MHz,  $\text{CDCl}_3$ )  $\delta$  145.96, 145.02, 131.90, 129.13, 128.62, 128.60, 127.68, 126.39, 44.33, 21.93. **HRMS** (FTMS + p ESI)  $m/z$ :  $[\text{M}-\text{H}]^-$  calculated for  $\text{C}_{14}\text{H}_{12}\text{Cl}$ , 215.0622; found, 215.0621.

### 1,2-dimethoxy-4-(1-(*p*-tolyl)ethyl)benzene (9)

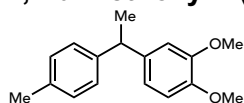

Prepared according to **General Procedure A** with 1,2-dimethoxybenzene (76.7  $\mu\text{L}$ , 3.0 equiv, 0.6 mmol) and 2-(*p*-tolyl)propanoic acid (0.033 g, 1.0 equiv, 0.20 mmol).  $\text{Na}_2\text{CO}_3$  (0.064 g, 3.0 equiv,

0.60 mmol) was used in place of NaOAc. Purification by flash chromatography on silica gel, eluting with 1–5% ethyl acetate in hexanes, afforded the product as a clear oil (50.2 mg, 98% yield). The spectral data matched those previously reported.<sup>7</sup> **<sup>1</sup>H NMR** (500 MHz, CDCl<sub>3</sub>) δ 7.14 – 7.07 (m, 4H), 6.83 – 6.77 (m, 2H), 6.73 (d, *J* = 1.9 Hz, 1H), 4.07 (q, *J* = 7.2 Hz, 1H), 3.85 (s, 3H), 3.82 (s, 3H), 2.31 (s, 3H), 1.61 (d, *J* = 7.2 Hz, 3H). **<sup>13</sup>C NMR** (126 MHz, CDCl<sub>3</sub>) δ 148.93, 147.42, 143.79, 139.40, 135.59, 129.17, 127.48, 120.98, 119.41, 111.36, 56.04, 55.96, 44.09, 22.28, 21.11. **HRMS** (FTMS + p ESI) *m/z*: [M+H]<sup>+</sup> calculated for C<sub>17</sub>H<sub>21</sub>O<sub>2</sub>, 257.1536; found, 257.1533.

#### 1,2-dimethoxy-4-(1-phenylethyl)benzene (10)

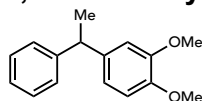

Prepared according to **General Procedure A** with 1,2-dimethoxybenzene (76.7 μL, 3.0 equiv, 0.6 mmol) and 2-phenylpropanoic acid (0.030 g, 1.0 equiv, 0.20 mmol). Na<sub>2</sub>CO<sub>3</sub> (0.064 g, 3.0 equiv, 0.60 mmol) was used in place of NaOAc. Purification by flash chromatography on silica gel, eluting with 1–5% ethyl acetate in hexanes, afforded the product as a clear oil (45.5 mg, 94% yield). The spectral data matched those previously reported.<sup>7</sup> **<sup>1</sup>H NMR** (500 MHz, CDCl<sub>3</sub>) δ 7.35 – 7.27 (m, 2H), 7.24 – 7.15 (m, 3H), 6.86 – 6.76 (m, 2H), 6.72 (d, *J* = 1.8 Hz, 1H), 4.10 (q, *J* = 7.2 Hz, 1H), 3.85 (s, 3H), 3.82 (s, 3H), 1.63 (d, *J* = 7.2 Hz, 3H). **<sup>13</sup>C NMR** (126 MHz, CDCl<sub>3</sub>) δ 148.95, 147.48, 146.76, 139.16, 128.49, 127.64, 126.13, 119.48, 111.41, 111.22, 56.04, 55.97, 44.48, 22.21. **HRMS** (FTMS + p ESI) *m/z*: [M+H]<sup>+</sup> calculated for C<sub>16</sub>H<sub>19</sub>O<sub>2</sub>, 243.1380; found, 243.1378.

#### 4-(1-(4-fluorophenyl)ethyl)-1,2-dimethoxybenzene (11)

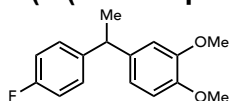

Prepared according to **General Procedure A** with 1,2-dimethoxybenzene (76.7 μL, 3.0 equiv, 0.6 mmol) and 2-(4-fluorophenyl)propanoic acid (0.034 g, 1.0 equiv, 0.20 mmol). Na<sub>2</sub>CO<sub>3</sub> (0.064 g, 3.0 equiv, 0.60 mmol) was used in place of NaOAc. Purification by flash chromatography on silica gel, eluting with 1–5% ethyl acetate in hexanes, afforded the product as a clear oil (44.7 mg, 86% yield). **<sup>1</sup>H NMR** (500 MHz, CDCl<sub>3</sub>) δ 7.16 (dd, *J* = 8.8, 5.4, 2H), 6.96 (t, *J* = 8.8 Hz, 2H), 6.80 (d, *J* = 8.2 Hz, 1H), 6.75 (dd, *J* = 8.2, 2.0 Hz, 1H), 6.68 (d, *J* = 2.0 Hz, 1H), 4.08 (q, *J* = 7.2 Hz, 1H), 3.85 (s, 3H), 3.82 (s, 3H), 1.60 (d, *J* = 7.2 Hz, 3H). **<sup>13</sup>C NMR** (126 MHz, CDCl<sub>3</sub>) δ 161.39 (d, *J* = 243.9 Hz), 149.02, 147.57, 142.44 (d, *J* = 3.1 Hz), 138.97, 129.01 (d, *J* = 7.7 Hz), 119.39, 115.19 (d, *J* = 21.2 Hz), 111.29, 111.25, 56.04, 55.98, 43.74, 22.35. **<sup>19</sup>F NMR** (377 MHz, CDCl<sub>3</sub>) δ -117.54 (s, 1F). **HRMS** (FTMS + p ESI) *m/z*: [M+H]<sup>+</sup> calculated for C<sub>16</sub>H<sub>18</sub>FO<sub>2</sub>, 261.1285; found, 261.1283.

#### 4-(1-(4-chlorophenyl)ethyl)-1,2-dimethoxybenzene (12)

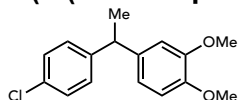

Prepared according to **General Procedure A** with 1,2-dimethoxybenzene (76.7 μL, 3.0 equiv, 0.6 mmol) and 2-(4-chlorophenyl)propanoic acid (0.037 g, 1.0 equiv, 0.20 mmol). Na<sub>2</sub>CO<sub>3</sub> (0.064 g, 3.0 equiv, 0.60 mmol) was used in place of NaOAc. Purification by flash chromatography on silica gel, eluting with 1–5% ethyl acetate in hexanes, afforded the product as a clear oil (49.9 mg, 90% yield). The spectral data matched those previously reported.<sup>7</sup> **<sup>1</sup>H NMR** (500 MHz, CDCl<sub>3</sub>) δ 7.24 (d, *J* = 8.4 Hz, 2H), 7.14 (d, *J* = 8.4 Hz, 2H), 6.80 (d, *J* = 8.2 Hz, 1H), 6.75 (dd, *J* = 8.2, 2.0 Hz, 1H), 6.68 (d, *J* = 2.0 Hz, 1H), 4.07 (q, *J* = 7.2 Hz, 1H), 3.85 (s, 3H), 3.82 (s, 3H), 1.60 (d, *J* = 7.2 Hz, 3H). **<sup>13</sup>C NMR** (126 MHz, CDCl<sub>3</sub>) δ 149.04, 147.64, 145.28, 138.56, 131.83, 129.01, 128.58, 127.72, 119.42, 111.27, 56.04, 55.99, 43.88, 22.13. **HRMS** (FTMS + p ESI) *m/z*: [M+H]<sup>+</sup> calculated for C<sub>16</sub>H<sub>18</sub>ClO<sub>2</sub>, 277.0990; found, 277.0987.

#### 4-(1-(4-bromophenyl)ethyl)-1,2-dimethoxybenzene (13)

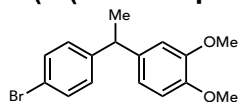

Prepared according to **General Procedure A** with 1,2-dimethoxybenzene (76.7  $\mu$ L, 3.0 equiv, 0.6 mmol) and 2-(4-bromophenyl)propanoic acid (0.046 g, 1.0 equiv, 0.20 mmol).  $\text{Na}_2\text{CO}_3$  (0.064 g, 3.0 equiv, 0.60 mmol) was used in place of NaOAc. Purification by flash chromatography on silica gel, eluting with 1–5% ethyl acetate in hexanes, afforded the product as a clear oil (55.9 mg, 87% yield).  $^1\text{H NMR}$  (500 MHz,  $\text{CDCl}_3$ )  $\delta$  7.39 (d,  $J = 8.4$  Hz, 2H), 7.08 (d,  $J = 8.4$  Hz, 2H), 6.80 (d,  $J = 8.2$  Hz, 1H), 6.75 (dd,  $J = 8.2, 2.0$  Hz, 1H), 6.68 (d,  $J = 2.0$  Hz, 1H), 4.05 (q,  $J = 7.2$  Hz, 1H), 3.85 (s, 3H), 3.82 (s, 3H), 1.59 (d,  $J = 7.2$  Hz, 3H).  $^{13}\text{C NMR}$  (126 MHz,  $\text{CDCl}_3$ )  $\delta$  149.05, 147.65, 145.81, 138.45, 131.53, 129.43, 128.57, 119.90, 119.42, 111.27, 56.04, 56.00, 43.95, 22.07. **HRMS** (FTMS + p ESI)  $m/z$ :  $[\text{M}+\text{H}]^+$  calculated for  $\text{C}_{16}\text{H}_{18}\text{BrO}_2$ , 321.0485; found, 321.0481.

#### 1,2-dimethoxy-4-(1-(4-(trifluoromethyl)phenyl)ethyl)benzene (14)

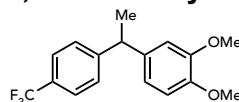

Prepared according to **General Procedure A** with 1,2-dimethoxybenzene (76.7  $\mu$ L, 3.0 equiv, 0.6 mmol) and 2-(4-(trifluoromethyl)phenyl)propanoic acid (0.044 g, 1.0 equiv., 0.20 mmol).  $\text{Na}_2\text{CO}_3$  (0.064 g, 3.0 equiv, 0.60 mmol) was used in place of NaOAc. Purification by flash chromatography on silica gel, eluting with 1–5% ethyl acetate in hexanes, afforded the product as a clear oil (18.0 mg, 29% yield). The spectral data matched those previously reported.<sup>8</sup>  $^1\text{H NMR}$  (500 MHz,  $\text{CDCl}_3$ )  $\delta$  7.53 (d,  $J = 8.3$  Hz, 2H), 7.32 (d,  $J = 8.3$  Hz, 2H), 6.82 (d,  $J = 8.2$  Hz, 1H), 6.76 (dd,  $J = 8.2, 2.1$  Hz, 1H), 6.69 (d,  $J = 2.1$  Hz, 1H), 4.15 (q,  $J = 7.2$  Hz, 1H), 3.86 (s, 3H), 3.83 (s, 3H), 1.64 (d,  $J = 7.2$  Hz, 3H).  $^{13}\text{C NMR}$  (126 MHz,  $\text{CDCl}_3$ )  $\delta$  150.87, 149.12, 147.79, 137.99, 128.48 (q,  $J = 32.4$  Hz), 127.96, 125.46 (q,  $J = 3.8$  Hz), 124.47 (q,  $J = 271.9$  Hz), 119.52, 111.34, 111.31, 56.06, 56.03, 44.38, 21.98.  $^{19}\text{F NMR}$  (377 MHz,  $\text{CDCl}_3$ )  $\delta$  -62.32 (s, 3F). **HRMS** (FTMS + p ESI)  $m/z$ :  $[\text{M}+\text{H}]^+$  calculated for  $\text{C}_{17}\text{H}_{18}\text{F}_3\text{O}_2$ , 311.1253; found, 311.1251.

#### 2-benzyl-1,4-dimethoxybenzene (15)

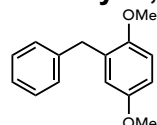

Prepared according to **General Procedure A** with 1,4-dimethoxybenzene (0.124 g, 3.0 equiv, 0.9 mmol) and phenylacetic acid (0.038 mL, 1.0 equiv, 0.3 mmol). Purification by flash chromatography on silica gel, eluting with a gradient of 1-5% ether in pentanes, afforded the product as a clear oil (14 mg, 21% yield).  $^1\text{H NMR}$  (500 MHz,  $\text{CDCl}_3$ )  $\delta$  7.29 – 7.23 (m, 2H), 7.23 – 7.14 (m, 3H), 6.79 (d,  $J = 8.8$  Hz, 1H), 6.71 (dd,  $J = 8.8, 3.1$  Hz, 1H), 6.65 (d,  $J = 3.1$  Hz, 1H), 3.94 (s, 2H), 3.77 (s, 3H), 3.71 (s, 3H).  $^{13}\text{C NMR}$  (126 MHz,  $\text{CDCl}_3$ )  $\delta$  153.68, 151.85, 140.91, 131.10, 129.09, 128.43, 125.99, 117.01, 111.59, 111.40, 56.20, 55.78, 36.13. **HRSM** (FTMS + p ESI)  $m/z$ :  $[\text{M} + \text{H}]^+$  calculated for  $\text{C}_{15}\text{H}_{16}\text{O}_2\text{H}$ , 229.1223; found, 229.1220.

#### 1,4-dimethoxy-2-(1-phenylethyl)benzene (16)

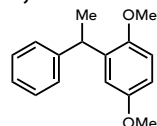

Prepared according to **General Procedure A** with 1,4-dimethoxybenzene (0.124 g, 3.0 equiv, 0.9 mmol) and 2-phenylpropanoic acid (0.045 g, 1.0 equiv, 0.3 mmol). Purification by flash chromatography on silica gel, eluting with a gradient of 1-10% ether in pentanes, afforded the product as a clear oil (41 mg, 54% yield). **<sup>1</sup>H NMR** (500 MHz, CDCl<sub>3</sub>) δ 7.28 – 7.22 (m, 5H), 7.17 – 7.13 (m, 1H), 6.77 (d, *J* = 8.8 Hz, 1H), 6.74 (d, *J* = 3.0 Hz, 1H), 6.68 (dd, *J* = 8.8, 3.1 Hz, 1H), 4.54 (q, *J* = 7.2 Hz, 1H), 3.73 (s, 3H), 3.71 (s, 3H), 1.56 (d, *J* = 7.3 Hz, 3H). **<sup>13</sup>C NMR** (126 MHz, CDCl<sub>3</sub>) δ 153.78, 151.40, 146.25, 136.53, 128.27, 127.81, 125.89, 114.90, 111.82, 110.65, 56.34, 55.76, 37.71, 21.02. **HRSM** (FTMS + p ESI) *m/z*: [M + Na]<sup>+</sup> calculated for C<sub>16</sub>H<sub>18</sub>O<sub>2</sub>Na, 265.1199; found, 265.1195.

#### 1,4-dimethoxy-2-(1-phenylpropyl)benzene (17)

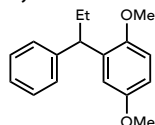

Prepared according to **General Procedure A** with 1,4-dimethoxybenzene (0.124 g, 3.0 equiv, 0.9 mmol) and 2-phenylbutyric acid (0.049 g, 1.0 equiv, 0.3 mmol). Purification by flash chromatography on silica gel, eluting with 1% ether in pentanes, afforded the product as a clear oil (62 mg, 71% yield). **<sup>1</sup>H NMR** (500 MHz, CDCl<sub>3</sub>) δ 7.25 (dd, *J* = 5.7, 3.3 Hz, 4H), 7.16 – 7.10 (m, 1H), 6.82 (d, *J* = 3.1 Hz, 1H), 6.75 (d, *J* = 8.8 Hz, 1H), 6.67 (dd, *J* = 8.8, 3.1 Hz, 1H), 4.25 (t, *J* = 7.8 Hz, 1H), 3.74 (s, 3H), 3.71 (s, 3H), 2.00 (p, *J* = 7.4 Hz, 2H), 0.89 (t, *J* = 7.3 Hz, 3H). **<sup>13</sup>C NMR** (126 MHz, CDCl<sub>3</sub>) δ 153.80, 151.76, 145.03, 135.35, 128.30, 128.24, 125.89, 114.81, 111.94, 110.52, 56.41, 55.77, 45.33, 28.06, 12.87. **HRSM** (FTMS + p ESI) *m/z*: [M + Na]<sup>+</sup> calculated for C<sub>17</sub>H<sub>20</sub>O<sub>2</sub>Na, 279.1355; found, 279.1353.

#### (1-(2,5-dimethoxyphenyl)ethane-1,2-diyl)dibenzene (18)

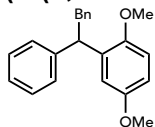

Prepared according to **General Procedure A** with 1,4-dimethoxybenzene (0.124 g, 3.0 equiv, 0.9 mmol) and 2,3-diphenylpropanoic acid (0.068 g, 1.0 equiv, 0.3 mmol). Purification by flash chromatography on silica gel, eluting with a gradient of 1-10% ether in pentanes, afforded the product as a clear oil (59 mg, 55% yield). **<sup>1</sup>H NMR** (500 MHz, CDCl<sub>3</sub>) δ 7.25 – 7.18 (m, 4H), 7.17 – 7.07 (m, 4H), 7.06 – 7.03 (m, 2H), 6.86 (d, *J* = 3.0 Hz, 1H), 6.72 (d, *J* = 8.8 Hz, 1H), 6.66 (dd, *J* = 8.8, 3.0 Hz, 1H), 4.70 (t, *J* = 7.8 Hz, 1H), 3.73 (s, 3H), 3.61 (s, 3H), 3.29 (dd, *J* = 7.8, 3.4 Hz, 2H). **<sup>13</sup>C NMR** (126 MHz, CDCl<sub>3</sub>) δ 153.71, 151.52, 144.05, 140.73, 134.82, 129.19, 128.49, 128.21, 128.08, 126.07, 125.86, 115.18, 112.03, 110.86, 56.33, 55.79, 45.38, 41.36. **HRSM** (FTMS + p ESI) *m/z*: [M + H]<sup>+</sup> calculated for C<sub>22</sub>H<sub>22</sub>O<sub>2</sub>H, 319.1693; found, 319.1686.

#### ((2,5-dimethoxyphenyl)methylene)dibenzene (19)

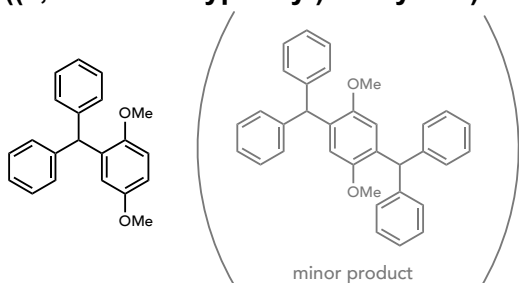

Prepared according to **General Procedure A** with 1,4-dimethoxybenzene (0.124 g, 3.0 equiv, 0.9 mmol) and diphenylacetic acid (0.064 g, 1.0 equiv, 0.3 mmol). Purification by flash

chromatography on silica gel, eluting with a gradient of 1-10% ether in pentanes, afforded the product as a clear oil (54 mg, 58% yield, 8:1). The spectral data matched those previously reported.<sup>9</sup> *Where resolved, signals for the minor product are given in brackets.* **<sup>1</sup>H NMR** (500 MHz, Chloroform-*d*) δ 7.30 – 7.22 (m, 5.21H), 7.22 – 7.15 (m, 2.53H), 7.13 – 7.05 (m, 5.11H), 6.80 (d, *J* = 8.8 Hz, 1H), 6.72 (dd, *J* = 8.8, 3.1 Hz, 1H), 6.46 (d, *J* = 3.0 Hz, 1H), [6.43 (s, 0.24H)], 5.89 (s, 1H), [5.87 (s, 0.24H)], 3.66 (s, 3H), 3.64 (s, 3H), [3.43 (s, 0.72H)]. **<sup>13</sup>C NMR** (126 MHz, CDCl<sub>3</sub>) δ 153.53, 151.73, [151.22], [144.08], 143.81, 134.27, [131.54], 129.56, 128.28, [128.25], 126.22, [126.19], 117.57, [114.27], 111.99, 111.17, 56.51, 55.68, 49.91, [49.84].

#### 4-chloro-1-methoxy-2-(1-phenylethyl)benzene (20)

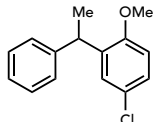

Prepared according to **General Procedure A** with 4-chloroanisole (0.128 g, 3.0 equiv, 0.9 mmol) and 2-phenylpropanoic acid (0.030 g, 1.0 equiv, 0.20 mmol). Purification by flash chromatography on silica gel, eluting with <5% ethyl acetate in hexanes, afforded a mixture of the product and 4-chloroanisole. Fractions that eluted between 0–5% ethyl acetate in hexanes were recombined and purified by reverse phase flash chromatography over C18 functionalized silica, eluting with a slow gradient of 0–100% with H<sub>2</sub>O/MeCN. The product eluted at ~65% MeCN. The product containing fractions were combined, concentrated under reduced pressure, diluted with CH<sub>2</sub>Cl<sub>2</sub>, filtered through a plug of MgSO<sub>4</sub>, and concentrated under reduced pressure to afford the product as a clear oil (55 mg, 74% yield). The spectral data matched those previously reported.<sup>10</sup> **<sup>1</sup>H NMR** (500 MHz, Chloroform-*d*) δ 7.32 – 7.08 (m, 7H), 6.75 (d, *J* = 8.5 Hz, 1H), 4.52 (q, *J* = 7.2 Hz, 1H), 3.75 (s, 3H), 1.56 (d, *J* = 7.3 Hz, 3H). **<sup>13</sup>C NMR** (126 MHz, CDCl<sub>3</sub>) δ 155.60, 145.65, 136.95, 128.37, 127.85, 127.78, 126.85, 126.11, 125.66, 111.93, 55.88, 37.59, 20.90.

#### (3-(1-(6-bromo-2-methoxynaphthalen-1-yl)ethyl)phenyl)(phenyl)methanone (21)

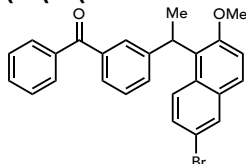

Prepared according to **General Procedure A** with 2-bromo-6-methoxynaphthalene (0.213 g, 3.0 equiv, 0.9 mmol) and 2-(3-benzoylphenyl)propanoic acid (0.076 g, 1.0 equiv, 0.3 mmol). Purification by flash chromatography on silica gel, eluting with 10% ethyl acetate in hexanes, afforded the product as a white solid (79 mg, 60% yield). **<sup>1</sup>H NMR** (500 MHz, Chloroform-*d*) δ 7.94 (d, *J* = 2.1 Hz, 1H), 7.73 – 7.63 (m, 5H), 7.59 – 7.50 (m, 2H), 7.45 – 7.39 (m, 1H), 7.40 – 7.35 (m, 3H), 7.33 (t, *J* = 7.7 Hz, 1H), 7.27 (d, *J* = 9.1 Hz, 1H), 5.27 (q, *J* = 7.3 Hz, 1H), 3.81 (s, 3H), 1.83 (d, *J* = 7.3 Hz, 3H). **<sup>13</sup>C NMR (126 MHz, CDCl<sub>3</sub>)** δ 197.09, 155.20, 146.18, 137.81, 137.49, 132.44, 131.36, 131.26, 130.96, 130.78, 130.21, 129.41, 128.60, 128.27, 128.10, 127.98, 127.55, 127.55, 126.25, 117.06, 115.32, 56.74, 34.61, 18.19. **mp**: 85 – 90 °C **HRSMS** (FTMS + p ESI) *m/z*: [M + H]<sup>+</sup> calculated for C<sub>26</sub>H<sub>21</sub>BrO<sub>2</sub>H, 445.0798; found, 445.0791.

#### phenyl(3-(1-phenylethyl)-1H-indol-1-yl)methanone (22)

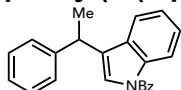

Prepared according to **General Procedure A** with 1-benzoylindole (0.066 g, 3.0 equiv, 0.3 mmol) and 2-phenylpropanoic acid (0.015 g, 1.0 equiv, 0.10 mmol). Fe(OTf)<sub>3</sub> (0.150 g, 3.0 equiv, 0.30 mmol) and Na<sub>2</sub>CO<sub>3</sub> (0.032 g, 3.0 equiv, 0.30 mmol) were used in place of FeCl<sub>3</sub> and NaOAc,



respectively. Purification by flash chromatography on silica gel, eluting with 0–2.5% ether in pentane, afforded the product as a white solid (24.9 mg, 77% yield). **<sup>1</sup>H NMR** (500 MHz, CDCl<sub>3</sub>) δ 8.30 (d, *J* = 8.3 Hz, 1H), 7.78 – 7.71 (m, 2H), 7.65 – 7.58 (m, 1H), 7.57 – 7.51 (m, 2H), 7.35 – 7.23 (m, 6H), 7.23 – 7.13 (m, 3H), 4.27 (q, *J* = 7.1 Hz, 1H), 1.62 (d, *J* = 7.1 Hz, 3H). **<sup>13</sup>C NMR** (126 MHz, CDCl<sub>3</sub>) δ 168.62, 145.23, 136.91, 135.03, 131.96, 130.59, 129.28, 128.76, 128.67, 127.46, 126.97, 126.53, 125.07, 124.02, 123.75, 120.11, 116.54, 36.96, 22.08. **mp**: 101.6 – 102.7 °C. **HRMS** (FTMS + p ESI) *m/z*: [M+H]<sup>+</sup> calculated for C<sub>23</sub>H<sub>20</sub>NO, 326.1539; found, 326.1536.

### 5-bromo-3-(1-phenylethyl)benzo[b]thiophene (23)

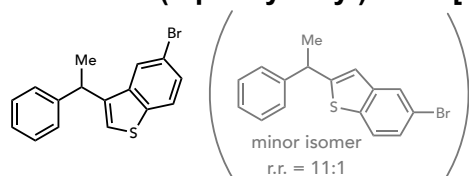

Prepared according to **General Procedure A** with 5-bromobenzo[b]thiophene (0.128 g, 3.0 equiv, 0.6 mmol) and 2-phenylpropanoic acid (0.030 g, 1.0 equiv, 0.20 mmol). Na<sub>2</sub>CO<sub>3</sub> (0.064 g, 3.0 equiv, 0.60 mmol) was used in place of NaOAc. Purification by flash chromatography on silica gel, eluting with 5–10% ethyl acetate in hexanes, afforded a mixture of the two isomeric products as a pale yellow oil (44.3 mg, 70% yield, 11:1 *r.r.*). *Where resolved, signals for the minor isomer are given in brackets.* **<sup>1</sup>H NMR** (500 MHz, CDCl<sub>3</sub>) δ [7.79 (d, *J* = 1.9 Hz, 0.09H)], 7.71 – 7.65 (m, 2H), [7.57 (d, *J* = 8.5 Hz, 0.09H)], 7.38 (dd, *J* = 8.5, 1.9 Hz, 1H), [7.35 – 7.32 (m, 0.27H)], 7.32 – 7.27 (m, 2.18H), 7.25 – 7.17 (m, 4.09H), [6.96 (m, 0.09H)], 4.38 (q, *J* = 7.1 Hz, 1.09H), [1.76 (d, *J* = 7.1 Hz, 0.27H)], 1.72 (d, *J* = 7.1 Hz, 3H). **<sup>13</sup>C NMR** (126 MHz, CDCl<sub>3</sub>) δ [153.83], [145.01], 144.93, [141.65], 140.42, 140.24, [139.51], 139.45, [138.23], [129.04], 128.80, [127.49], 127.44, 127.38, [127.06], [126.76], 126.66, [125.81], 125.34, 124.22, [123.60], 123.37, [119.45], 118.20, [41.62], 39.50, [22.80], 22.49. **HRMS** (FTMS + p ESI) *m/z*: [M-H]<sup>-</sup> calculated for C<sub>16</sub>H<sub>12</sub>BrS, 314.9838; found, 314.9836.

### 2-(1-(*o*-tolyl)ethyl)benzofuran (24)

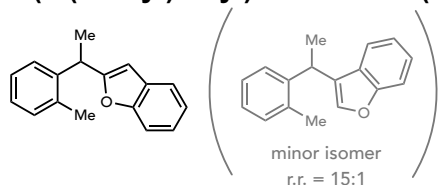

Prepared according to **General Procedure A** with benzofuran (64.6 μL, 3.0 equiv, 0.6 mmol) and 2-(*o*-tolyl)propanoic acid (0.033 g, 1.0 equiv, 0.20 mmol). Fe(OTf)<sub>3</sub> (0.302 g, 3.0 equiv, 0.60 mmol) and Na<sub>3</sub>PO<sub>4</sub> (0.098 g, 3.0 equiv, 0.60 mmol) were used in place of FeCl<sub>3</sub> and NaOAc, respectively. The crude reaction mixture was purified by reverse phase flash chromatography over C18 functionalized silica, eluting with a slow gradient of 0–100% with H<sub>2</sub>O/MeOH. The product eluted at ~80% MeOH. Product-containing fractions were combined, diluted with EtOAc, and washed with brine (1x). The aqueous layer was washed with EtOAc (3x). The combined organic layers were dried over MgSO<sub>4</sub>, filtered, and concentrated under reduced pressure to afford a mixture of the two isomeric products as a clear oil (34.9 mg, 74% yield, 15:1 C2:C3). **<sup>1</sup>H NMR** (500 MHz, CDCl<sub>3</sub>) δ 7.55 – 7.45 (m, 1H), 7.39 (m, 1H), 7.21 – 7.11 (m, 6H), 6.39 (t, *J* = 1.1 Hz, 1H), 4.50 (q, *J* = 7.1 Hz, 1H), 2.43 (s, 3H), 1.68 (d, *J* = 7.1 Hz, 3H). **<sup>13</sup>C NMR** (126 MHz, CDCl<sub>3</sub>) δ 162.39, 154.97, 141.44, 135.75, 130.66, 128.83, 126.85, 126.78, 126.48, 123.49, 122.57, 120.53, 111.10, 102.41, 35.60, 19.58, 19.55. **HRMS** (FTMS + p ESI) *m/z*: [M+H]<sup>+</sup> calculated for C<sub>17</sub>H<sub>17</sub>O, 237.1274; found, 237.1272.

### 2-(2-phenylpropan-2-yl)furan (25)

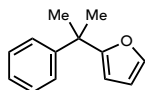

Prepared according to **General Procedure A** with furan (0.109 mL, 5.0 equiv, 1.5 mmol) and 2-methyl-2-phenylpropanoic acid (0.049 g, 1.0 equiv, 0.3 mmol). The crude reaction mixture was purified by reverse phase flash chromatography over C18 functionalized silica with H<sub>2</sub>O/MeOH. The product eluted around ~90% MeOH. Product-containing fractions were combined, diluted with EtOAc, and washed with brine (1x). The aqueous layer was washed with EtOAc (3x). The combined organic layers were dried over MgSO<sub>4</sub>, filtered through a plug of celite, and concentrated under reduced pressure to afford the product as a clear oil (27 mg, 48% yield). The spectral data matched those previously reported.<sup>11</sup> **<sup>1</sup>H NMR** (500 MHz, Chloroform-*d*) δ 7.33 – 7.26 (m, 3H), 7.24 – 7.16 (m, 3H), 6.30 (dd, *J* = 3.2, 1.8 Hz, 1H), 6.11 (dd, *J* = 3.2, 0.9 Hz, 1H), 1.66 (s, 6H). **<sup>13</sup>C NMR** (126 MHz, CDCl<sub>3</sub>) δ 162.53, 148.04, 141.38, 128.31, 126.22, 126.08, 109.87, 104.53, 40.35, 28.67.

### 2-(3-chloro-1-phenylpropyl)-1-tosyl-1H-pyrrole (26)

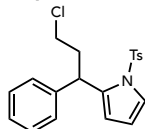

Prepared according to **General Procedure A** with 1-tosyl-1H-pyrrole (0.332 g, 5.0 equiv, 1.5 mmol) and **S1** (0.060 g, 1.0 equiv, 0.3 mmol). The crude reaction mixture was purified by reverse phase flash chromatography over C18 functionalized silica with H<sub>2</sub>O/MeOH. The product eluted around ~90% MeOH. Product-containing fractions were combined, diluted with EtOAc, and washed with brine (1x). The aqueous layer was washed with EtOAc (3x). The combined organic layers were dried over MgSO<sub>4</sub>, filtered through a plug of celite, and concentrated under reduced pressure to afford the product as a clear oil (70 mg, 62% yield). **<sup>1</sup>H NMR** (500 MHz, Chloroform-*d*) δ 7.38 – 7.27 (m, 3H), 7.20 – 7.09 (m, 3H), 7.08 – 7.00 (m, 4H), 6.28 (t, *J* = 3.4 Hz, 1H), 6.24 (dd, *J* = 3.6, 1.7 Hz, 1H), 4.74 (dd, *J* = 8.4, 6.9 Hz, 1H), 3.49 – 3.26 (m, 2H), 2.37–2.26 (m, 4 H), 2.21 (ddt, *J* = 14.3, 8.4, 6.2 Hz, 1H). **<sup>13</sup>C NMR** (126 MHz, CDCl<sub>3</sub>) δ 144.52, 141.91, 136.85, 136.29, 129.77, 128.52, 128.10, 126.77, 126.60, 123.31, 112.73, 111.45, 42.75, 40.21, 39.98, 21.63. **HRSM** (FTMS + *p* ESI) *m/z*: [M + H]<sup>+</sup> calculated for C<sub>20</sub>H<sub>20</sub>ClNO<sub>2</sub>SH, 374.0976; found, 374.0975.

### 2-(4-methoxyphenyl)-1-tosylpyrrolidine (27)

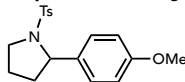

Prepared according to **General Procedure A** with anisole (0.163 mL, 5.0 equiv, 1.5 mmol) and **S2** (0.086 g, 1.0 equiv, 0.30 mmol). Purification by flash chromatography on silica gel, eluting with 30% ethyl acetate in hexanes, afforded the product as a pale yellow oil (36 mg, 33% yield). The spectral data matched those previously reported.<sup>12</sup> **<sup>1</sup>H NMR** (500 MHz, Chloroform-*d*) δ 7.68 – 7.63 (m, 2H), 7.27 (d, *J* = 9.6 Hz, 4H), 7.24 – 7.19 (m, 2H), 6.85 – 6.80 (m, 2H), 4.73 (dd, *J* = 7.9, 3.9 Hz, 1H), 3.79 (s, 3H), 3.63 – 3.55 (m, 1H), 3.46 – 3.37 (m, 1H), 2.42 (s, 3H), 2.02 – 1.74 (m, 3H), 1.71 – 1.59 (m, 1H). **<sup>13</sup>C NMR** (126 MHz, CDCl<sub>3</sub>) δ 158.82, 143.30, 135.45, 135.28, 129.66, 127.65, 127.48, 113.85, 62.97, 55.44, 49.44, 35.93, 24.15, 21.66.

### 1,2,3-trimethoxy-4-(1-(*p*-tolyl)ethyl)benzene (28)

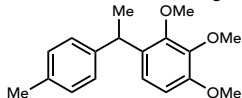

Prepared according to **General Procedure A** with 1,2,3-trimethoxybenzene (0.151 g, 3.0 equiv, 0.9 mmol) and 2-(*p*-tolyl)propanoic acid (0.049 g, 1.0 equiv, 0.3 mmol). Purification by flash chromatography on silica gel, eluting with a gradient of 0-15% ethyl acetate in hexanes, afforded the product as a clear oil (46 mg, 54% yield). **<sup>1</sup>H NMR** (500 MHz, Chloroform-*d*) δ 7.11 (d, *J* = 8.3 Hz, 2H), 7.06 (d, *J* = 8.0 Hz, 2H), 6.87 (d, *J* = 8.6 Hz, 1H), 6.62 (d, *J* = 8.7 Hz, 1H), 4.41 (q, *J* = 7.3 Hz, 1H), 3.84 (d, *J* = 9.4 Hz, 6H), 3.65 (s, 3H), 2.29 (s, 3H), 1.54 (d, *J* = 7.3 Hz, 3H). **<sup>13</sup>C NMR** (126 MHz, CDCl<sub>3</sub>) δ 152.11, 151.64, 144.04, 142.42, 135.26, 132.90, 129.00, 127.53, 121.91, 107.17, 60.86, 60.77, 56.07, 37.48, 21.89, 21.10. **HRSM** (FTMS + *p* ESI) *m/z*: [M + H]<sup>+</sup> calculated for C<sub>18</sub>H<sub>22</sub>O<sub>3</sub>H, 287.1642; found, 287.1637.

### 3-(1-(2-fluoro-[1,1'-biphenyl]-4-yl)ethyl)-2,6-dimethoxypyridine (29)

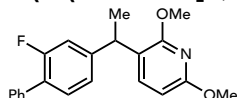

Prepared according to **General Procedure A** with 2,6-dimethoxypyridine (79.2 μL, 3.0 equiv, 0.6 mmol) and flurbiprofen (0.049 g, 1.0 equiv, 0.20 mmol). Na<sub>3</sub>PO<sub>4</sub> (0.098 g, 3.0 equiv, 0.60 mmol) was used in place of NaOAc. After irradiation for 24 h, the lights were powered off, and the reaction was heated at 80 °C for an additional 16 h. The crude reaction mixture was purified by reverse phase flash chromatography over C18 functionalized silica, eluting with a slow gradient of 0–100% with H<sub>2</sub>O/MeOH. The product eluted at ~95% MeOH. Product-containing fractions were combined, diluted with EtOAc, and washed with brine (1x). The aqueous layer was washed with EtOAc (3x). The combined organic layers were dried over MgSO<sub>4</sub>, filtered, and concentrated under reduced pressure to afford the product as a clear oil (54.5 mg, 81% yield) **<sup>1</sup>H NMR** (500 MHz, CDCl<sub>3</sub>) δ 7.56 – 7.50 (m, 2H), 7.42 (t, *J* = 7.5 Hz, 2H), 7.38 (d, *J* = 8.0 Hz, 1H), 7.37 – 7.29 (m, 2H), 7.06 (dd, *J* = 8.0, 1.8 Hz, 1H), 7.00 (dd, *J* = 12.0, 1.8 Hz, 1H), 6.29 (d, *J* = 8.0 Hz, 1H), 4.38 (q, *J* = 7.2 Hz, 1H), 3.93 (s, 3H), 3.90 (s, 3H), 1.57 (d, *J* = 7.2 Hz, 3H). **<sup>13</sup>C NMR** (126 MHz, CDCl<sub>3</sub>) δ 161.59, 159.85, 159.79 (d, *J* = 247.4 Hz), 147.97 (d, *J* = 7.1 Hz), 138.79, 136.03, 129.08, 128.52, 127.54, 126.57, 126.46, 123.61 (d, *J* = 3.2 Hz), 119.04, 115.19 (d, *J* = 23.1 Hz), 100.44, 53.63, 53.47, 36.73, 20.65. **<sup>19</sup>F NMR** (377 MHz, CDCl<sub>3</sub>) δ -118.59. **HRMS** (FTMS + *p* ESI) *m/z*: [M+H]<sup>+</sup> calculated for C<sub>21</sub>H<sub>21</sub>FNO<sub>2</sub>, 338.1551; found, 338.1548.

### (3*r*,5*r*,7*r*)-1-(4-methoxyphenyl)adamantane (30)

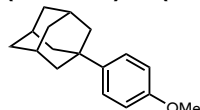

Prepared according to **General Procedure A** with anisole (0.098 mL, 3.0 equiv, 0.9 mmol) and (3*r*,5*r*,7*r*)-adamantane-1-carboxylic acid (0.054 g, 1.0 equiv, 0.3 mmol). The crude reaction mixture was purified by reverse phase flash chromatography over C18 functionalized silica with H<sub>2</sub>O/MeOH. The product eluted around ~95% MeOH. Product-containing fractions were combined, diluted with EtOAc, and washed with brine (1x). The aqueous layer was washed with EtOAc (3x). The combined organic layers were dried over MgSO<sub>4</sub>, filtered through a plug of celite, and concentrated under reduced pressure to afford the product as an off-white solid (34 mg, 47% yield). The spectral data matched those previously reported.<sup>13</sup> **<sup>1</sup>H NMR** (500 MHz, Chloroform-*d*) δ 7.28 (d, *J* = 8.9 Hz, 2H), 6.86 (d, *J* = 8.8 Hz, 2H), 3.79 (s, 3H), 2.13 – 2.06 (m, 3H), 1.91 – 1.86 (m, 6H), 1.83 – 1.69 (m, 6H). **<sup>13</sup>C NMR** (126 MHz, CDCl<sub>3</sub>) δ 157.49, 143.87, 125.93, 113.55, 55.36, 43.55, 36.97, 35.70, 29.16.

### 1-methoxy-4-(1-methylcyclohexyl)benzene (31)

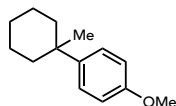

Prepared according to **General Procedure A** with anisole (65.1  $\mu$ L, 3.0 equiv, 0.60 mmol) and 1-methylcyclohexane-1-carboxylic acid (0.028 g, 1.0 equiv, 0.20 mmol). Purification by flash chromatography on silica gel, eluting with 5% ethyl acetate in hexanes, afforded the product as a pale yellow oil (21.1 mg, 52% yield). The spectral data matched those previously reported.<sup>14</sup> **<sup>1</sup>H NMR** (500 MHz,  $\text{CDCl}_3$ )  $\delta$  7.29 (d,  $J$  = 8.8 Hz, 2H), 6.87 (d,  $J$  = 8.8 Hz, 2H), 3.80 (s, 3H), 2.00 – 1.92 (m, 2H), 1.62 – 1.51 (m, 4H), 1.50 – 1.37 (m, 4H), 1.17 (s, 3H). **<sup>13</sup>C NMR** (126 MHz,  $\text{CDCl}_3$ )  $\delta$  157.24, 142.27, 126.96, 113.62, 55.30, 38.19, 37.38, 30.72, 26.55, 22.79. **HRMS** (FTMS + p ESI)  $m/z$ :  $[\text{M}+\text{H}]^+$  calculated for  $\text{C}_{14}\text{H}_{21}\text{O}$ , 205.1587; found, 205.1586.

### 1-methyl-4-(1-phenethoxyethyl)benzene (32)

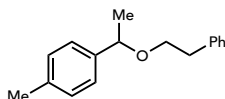

Prepared according to **General Procedure C** with 2-phenylethan-1-ol (0.108 mL, 3.0 equiv, 0.9 mmol) and 2-(*p*-tolyl)propanoic acid (0.049 g, 1.0 equiv, 0.3 mmol). Purification by flash chromatography on silica gel, eluting with 2% ethyl acetate in hexanes, afforded the product as a clear oil (58 mg, 80% yield). **<sup>1</sup>H NMR** (500 MHz,  $\text{CDCl}_3$ )  $\delta$  7.27 – 7.22 (m, 2H), 7.20 – 7.08 (m, 7H), 4.37 (q,  $J$  = 6.4 Hz, 1H), 3.54 – 3.44 (m, 2H), 2.93 – 2.79 (m, 2H), 2.32 (s, 3H), 1.41 (d,  $J$  = 6.5 Hz, 3H). **<sup>13</sup>C NMR** (126 MHz,  $\text{CDCl}_3$ )  $\delta$  141.04, 139.22, 137.07, 129.19, 129.07, 128.35, 126.23, 126.20, 78.03, 69.63, 36.71, 24.27, 21.24. **HRSM** (FTMS + p ESI)  $m/z$ :  $[\text{M} + \text{Na}]^+$  calculated for  $\text{C}_{17}\text{H}_{20}\text{ONa}$ , 263.1406; found, 263.1403.

### (1-phenethoxyethyl)benzene (33)

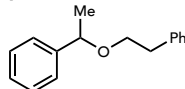

Prepared according to **General Procedure B** with 2-phenylethan-1-ol (0.108 mL, 3.0 equiv, 0.9 mmol) and 2-phenylpropanoic acid (0.045 g, 1.0 equiv, 0.3 mmol). Purification by flash chromatography on silica gel, eluting with 2% ether in hexanes, afforded the product as a clear oil (45 mg, 61% yield). **<sup>1</sup>H NMR** (500 MHz,  $\text{CDCl}_3$ )  $\delta$  7.33 – 7.28 (m, 2H), 7.27 – 7.23 (m, 5H), 7.21 – 7.14 (m, 3H), 4.40 (q,  $J$  = 6.5 Hz, 1H), 3.51 (t,  $J$  = 7.3 Hz, 2H), 2.95 – 2.80 (m, 2H), 1.42 (d,  $J$  = 6.5 Hz, 3H). **<sup>13</sup>C NMR** (126 MHz,  $\text{CDCl}_3$ )  $\delta$  144.10, 139.19, 129.08, 128.51, 128.38, 127.47, 126.27, 126.24, 78.24, 69.75, 36.71, 24.26. **HRSM** (FTMS + p ESI)  $m/z$ :  $[\text{M} + \text{Na}]^+$  calculated for  $\text{C}_{16}\text{H}_{18}\text{ONa}$ , 249.1250; found, 249.125.

### 1-fluoro-4-(1-phenethoxyethyl)benzene (34)

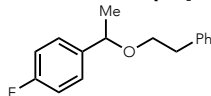

Prepared according to **General Procedure B** with phenylethanol (0.108 mL, 3.0 equiv, 0.9 mmol) and 2-(4-fluorophenyl)propanoic acid (0.050 g, 1.0 equiv, 0.3 mmol). Purification by flash chromatography on silica gel, eluting with 2% ether in hexanes, afforded the product as a clear oil (51 mg, 69% yield). **<sup>1</sup>H NMR** (400 MHz, Chloroform-*d*)  $\delta$  7.30 – 7.22 (m, 2H), 7.23 – 7.11 (m, 5H), 7.03 – 6.93 (m, 2H), 4.38 (q,  $J$  = 6.5 Hz, 1H), 3.55 – 3.39 (m, 2H), 2.87 (hept,  $J$  = 6.7 Hz, 2H), 1.40 (d,  $J$  = 6.5 Hz, 3H). **<sup>13</sup>C NMR** (126 MHz, Chloroform-*d*)  $\delta$  163.20, 161.25, 139.80 (d,  $J$  = 3.1 Hz), 139.14, 129.07, 128.41, 127.82 (d,  $J$  = 8.0 Hz), 126.29, 115.39, 115.22, 77.55, 69.69,

36.69, 24.24.  $^{19}\text{F}$  NMR (377 MHz,  $\text{CDCl}_3$ )  $\delta$  -115.57. HRSM (FTMS + p ESI) m/z:  $[\text{M} + \text{Na}]^+$  calculated for  $\text{C}_{16}\text{H}_{17}\text{FONa}$ , 267.1155; found, 267.1152.

### 1-chloro-4-(1-phenethoxyethyl)benzene (35)

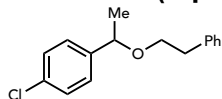

Prepared according to **General Procedure B** with 2-phenylethan-1-ol (0.108 mL, 3.0 equiv, 0.9 mmol) and 2-(4-chlorophenyl)propanoic acid (0.055 g, 1.0 equiv, 0.3 mmol). Reaction was irradiated for 48 h. Purification by flash chromatography on silica gel, eluting with 2% ether in hexanes, afforded the product as a clear oil (51 mg, 62% yield).  $^1\text{H}$  NMR (500 MHz,  $\text{CDCl}_3$ )  $\delta$  7.27 – 7.23 (m, 4H), 7.21 – 7.13 (m, 5H), 4.36 (q,  $J$  = 6.5 Hz, 1H), 3.57 – 3.42 (m, 2H), 2.92 – 2.78 (m, 2H), 1.39 (d,  $J$  = 6.5 Hz, 3H).  $^{13}\text{C}$  NMR (126 MHz,  $\text{CDCl}_3$ )  $\delta$  142.66, 139.09, 133.07, 129.07, 128.67, 128.41, 127.62, 126.30, 77.55, 69.80, 36.68, 24.18. HRSM (FTMS + p ESI) m/z:  $[\text{M} + \text{Na}]^+$  calculated for  $\text{C}_{16}\text{H}_{17}\text{ClONa}$ , 283.0860; found, 283.0858.

### (1-phenethoxypropyl)benzene (36)

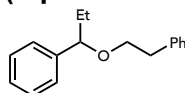

Prepared according to **General Procedure B** with 2-phenylethan-1-ol (0.108 mL, 3.0 equiv, 0.9 mmol) and 2-phenylbutanoic acid (0.049 g, 1.0 equiv, 0.3 mmol). Reaction was irradiated for 48 h. Purification by flash chromatography on silica gel, eluting with 2% ether in hexanes, afforded the product as a clear oil (50 mg, 69% yield).  $^1\text{H}$  NMR (500 MHz,  $\text{CDCl}_3$ ) 7.32 – 7.29 (m, 2H), 7.27 – 7.20 (m, 5H), 7.20 – 7.15 (m, 3H), 4.12 (t,  $J$  = 6.6 Hz, 1H), 3.54 (ddd,  $J$  = 9.4, 8.0, 6.5 Hz, 1H), 3.46 (ddd,  $J$  = 9.3, 8.0, 6.4 Hz, 1H), 2.94 – 2.79 (m, 2H), 1.85 – 1.76 (m, 1H), 1.70 – 1.60 (m, 1H), 0.85 (t,  $J$  = 7.4 Hz, 3H).  $^{13}\text{C}$  NMR (126 MHz,  $\text{CDCl}_3$ )  $\delta$  142.87, 139.31, 129.10, 128.37, 128.35, 127.44, 126.84, 126.19, 84.07, 69.86, 36.68, 31.26, 10.40. HRSM (FTMS + p ESI) m/z:  $[\text{M} + \text{H}]^+$  calculated for  $\text{C}_{17}\text{H}_{20}\text{OH}$ , 241.1587; found, 241.1585.

### (phenethoxymethylene)dibenzene (37)

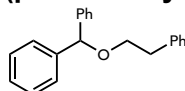

Prepared according to **General Procedure B** with 2-phenylethan-1-ol (0.108 mL, 3.0 equiv, 0.9 mmol) and 2,2-diphenylacetic acid (0.064 g, 1.0 equiv, 0.3 mmol). Purification by flash chromatography on silica gel, eluting with 2% ether in hexanes, afforded the product as a clear oil (84 mg, 97% yield).  $^1\text{H}$  NMR (500 MHz,  $\text{CDCl}_3$ )  $\delta$  7.30 – 7.18 (m, 10H), 7.24 – 7.17 (m, 5H), 5.34 (s, 1H), 3.67 (t,  $J$  = 7.1 Hz, 2H), 2.96 (t,  $J$  = 7.1 Hz, 2H).  $^{13}\text{C}$  NMR (126 MHz,  $\text{CDCl}_3$ )  $\delta$  142.51, 139.27, 129.19, 128.48, 128.41, 127.50, 127.06, 126.28, 83.91, 70.16, 36.69. HRSM (FTMS + p ESI) m/z:  $[\text{M} + \text{Na}]^+$  calculated for  $\text{C}_{21}\text{H}_{20}\text{ONa}$ , 311.1406; found, 311.1402.

### (2-phenethoxypropan-2-yl)benzene (38)

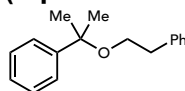

Prepared according to **General Procedure C** with 2-phenylethan-1-ol (0.108 mL, 3.0 equiv, 0.9 mmol) and 2-methyl-2-phenylpropanoic acid (0.049 g, 1.0 equiv, 0.3 mmol). Purification by flash chromatography on silica gel, eluting with 2% ethyl acetate in hexanes, afforded the product as a clear oil (37 mg, 51% yield).  $^1\text{H}$  NMR (500 MHz,  $\text{CDCl}_3$ )  $\delta$  7.34 – 7.12 (m, 10H), 3.36 (t,  $J$  = 7.4 Hz, 2H), 2.84 (t,  $J$  = 7.4 Hz, 2H), 1.51 (s, 6H).  $^{13}\text{C}$  NMR (126 MHz,  $\text{CDCl}_3$ )  $\delta$  146.57, 139.37,

129.20, 128.32, 128.25, 126.87, 126.20, 125.81, 76.81, 64.23, 37.27, 28.50. **HRSM** (FTMS + p ESI)  $m/z$ :  $[M + Na]^+$  calculated for  $C_{17}H_{20}ONa$ , 263.1406; found, 263.1405.

### 2-(3-(1-(*p*-tolyl)ethoxy)propyl)isoindoline-1,3-dione (39)

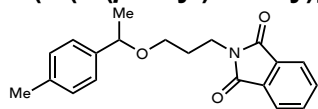

Prepared according to **General Procedure B** with 2-(3-hydroxypropyl)isoindoline-1,3-dione (0.185 g, 3.0 equiv, 0.9 mmol) and 2-(*p*-tolyl)propanoic acid (0.049 g, 1.0 equiv, 0.3 mmol). Purification by flash chromatography on silica gel, eluting with 10% ethyl acetate in hexanes, afforded the product as a clear oil (64 mg, 71% yield).  **$^1H$  NMR** (500 MHz,  $CDCl_3$ )  $\delta$  7.82 (dd,  $J = 5.4, 3.0$  Hz, 2H), 7.69 (dd,  $J = 5.5, 3.0$  Hz, 2H), 7.15 (d,  $J = 8.1$  Hz, 2H), 7.10 (d,  $J = 7.9$  Hz, 2H), 4.31 (q,  $J = 6.4$  Hz, 1H), 3.83 (dt,  $J = 13.8, 6.9$  Hz, 1H), 3.75 (dt,  $J = 13.7, 6.9$  Hz, 1H), 3.40 – 3.28 (m, 2H), 2.31 (s, 3H), 1.99 – 1.86 (m, 2H), 1.32 (d,  $J = 6.5$  Hz, 3H).  **$^{13}C$  NMR** (126 MHz,  $CDCl_3$ )  $\delta$  168.55, 140.94, 137.03, 133.89, 132.40, 129.15, 126.24, 123.22, 78.06, 66.22, 35.98, 28.82, 23.99, 21.22. **HRSM** (FTMS + p ESI)  $m/z$ :  $[M + Na]^+$  calculated for  $C_{20}H_{21}NO_3Na$ , 346.1413; found, 346.1406.

### 3-(3,3-dimethylbutoxy)-2,3-dihydro-1*H*-inden-1-one (40)

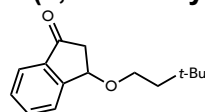

Prepared according to **General Procedure B** with 3,3-dimethylbutan-1-ol (0.109 mL, 3.0 equiv, 0.9 mmol) and 3-oxo-2,3-dihydro-1*H*-indene-1-carboxylic acid (0.053 g, 1.0 equiv, 0.3 mmol). Purification by flash chromatography on silica gel, eluting with 10% ethyl acetate in hexanes, afforded the product as a clear oil (54 mg, 77% yield).  **$^1H$  NMR** (500 MHz,  $CDCl_3$ )  $\delta$  7.76 (d,  $J = 7.8$  Hz, 1H), 7.71 – 7.63 (m, 2H), 7.50 – 7.45 (m, 1H), 5.08 (dd,  $J = 6.4, 2.9$  Hz, 1H), 3.68 (t,  $J = 7.3$  Hz, 2H), 3.01 (dd,  $J = 18.5, 6.4$  Hz, 1H), 2.66 (dd,  $J = 18.6, 2.9$  Hz, 1H), 1.67 – 1.51 (m, 2H), 0.96 (s, 9H).  **$^{13}C$  NMR** (126 MHz,  $CDCl_3$ )  $\delta$  203.33, 153.79, 136.88, 135.09, 129.51, 126.63, 123.35, 75.57, 67.52, 44.25, 43.33, 29.93, 29.87. **HRSM** (FTMS + p ESI)  $m/z$ :  $[M + H]^+$  calculated for  $C_{15}H_{20}O_2H$ , 233.1536; found, 233.1532.

### 2-((4-bromobenzyl)oxy)tetrahydrofuran (41)

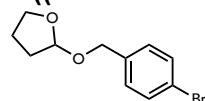

Prepared according to **General Procedure B** with (4-bromophenyl)methanol (0.168 g, 3.0 equiv, 0.9 mmol) and tetrahydrofuran-2-carboxylic acid (0.035 g, 1.0 equiv, 0.3 mmol). Pyridine (0.072 mL, 3.0 equiv, 0.9 mmol) was employed as the base in place of  $K_2HPO_4$ . The crude reaction mixture was purified by reverse phase flash chromatography over C18 functionalized silica with  $H_2O/MeOH$ . The product eluted around ~60% MeOH. Product-containing fractions were combined, diluted with EtOAc, and washed with brine (1x). The aqueous layer was washed with EtOAc (3x). The combined organic layers were dried over  $MgSO_4$ , filtered through a plug of celite, and concentrated under reduced pressure to afford the product as a clear oil (53 mg, 71% yield).  **$^1H$  NMR** (500 MHz, Chloroform-*d*)  $\delta$  7.45 (d,  $J = 8.4$  Hz, 2H), 7.21 (d,  $J = 8.3$  Hz, 2H), 5.19 (dd,  $J = 3.7, 2.6$  Hz, 1H), 4.65 (d,  $J = 12.1$  Hz, 1H), 4.42 (d,  $J = 12.2$  Hz, 1H), 3.98 – 3.84 (m, 2H), 2.06 – 1.99 (m, 1H), 1.98 – 1.91 (m, 2H), 1.89 – 1.80 (m, 1H).  **$^{13}C$  NMR** (126 MHz,  $CDCl_3$ )  $\delta$  137.61, 131.57, 129.58, 121.45, 103.34, 68.14, 67.24, 32.50, 23.59. **HRSM** (FTMS + p ESI)  $m/z$ :  $[M + H]^+$  calculated for  $C_{11}H_{13}BrO_2H$ , 257.0172; found, 257.0167.

## 2-fluoro-4-((1-(*p*-tolyl)ethoxy)methyl)-1-(trifluoromethyl)benzene (42)

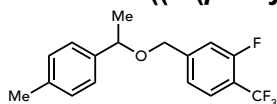

Prepared according to **General Procedure B** with (3-fluoro-4-(trifluoromethyl)phenyl)methanol (0.175 g, 3.0 equiv, 0.9 mmol) and 2-(*p*-tolyl)propanoic acid (0.049 g, 1.0 equiv, 0.3 mmol). Purification by flash chromatography on silica gel, eluting with 1% ethyl acetate in hexanes, afforded the product as a clear oil (83 mg, 89% yield). **<sup>1</sup>H NMR** (500 MHz, Chloroform-*d*)  $\delta$  7.53 (t,  $J$  = 7.6 Hz, 1H), 7.25 – 7.21 (m, 2H), 7.21 – 7.16 (m, 3H), 7.14 (d,  $J$  = 8.0 Hz, 1H), 4.46 (q,  $J$  = 6.6 Hz, 1H), 4.43 (d,  $J$  = 13.2 Hz, 1H), 4.33 (d,  $J$  = 12.9 Hz, 1H), 2.36 (s, 3H), 1.50 (d,  $J$  = 6.5 Hz, 3H). **<sup>13</sup>C NMR** (126 MHz, Chloroform-*d*)  $\delta$  161.05 (q,  $J$  = 2.1 Hz), 159.01 (q,  $J$  = 2.1 Hz), 146.40 (d,  $J$  = 7.1 Hz), 140.07, 137.70, 129.46, 127.14 (qd,  $J$  = 4.6, 1.8 Hz), 126.39, 122.50 (d,  $J$  = 3.5 Hz), 117.24 (qd,  $J$  = 32.9, 12.5 Hz), 115.49 (d,  $J$  = 21.0 Hz), 78.02, 68.87 (d,  $J$  = 1.6 Hz), 24.18, 21.27. **<sup>19</sup>F NMR** (377 MHz, Chloroform-*d*)  $\delta$  -61.23 (d,  $J$  = 12.7 Hz, 3F), -114.71 (q,  $J$  = 12.5 Hz, 1F). **HRSM** (FTMS + *p* ESI) *m/z*: [M – C<sub>8</sub>H<sub>5</sub>F]<sup>+</sup> calculated for C<sub>17</sub>H<sub>16</sub>F<sub>4</sub>O, 119.0855; found, 119.0855.

## 4-(1-((4-chlorobenzyl)oxy)ethyl)-2-fluoro-1,1'-biphenyl (43)

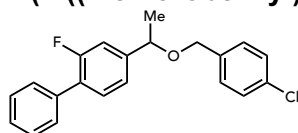

Prepared according to **General Procedure B** with (4-chlorophenyl)methanol (0.128 g, 3.0 equiv, 0.9 mmol) and 2-(2-fluoro-[1,1'-biphenyl]-4-yl)propanoic acid (0.073 g, 1.0 equiv, 0.3 mmol). Reaction was irradiated for 48 h. Purification by flash chromatography on silica gel, eluting with 5% ethyl acetate in hexanes, afforded the product as a clear oil (53 mg, 51% yield). **<sup>1</sup>H NMR** (500 MHz, Chloroform-*d*)  $\delta$  7.56 (dt,  $J$  = 8.1, 1.4 Hz, 2H), 7.48 – 7.40 (m, 3H), 7.40 – 7.34 (m, 1H), 7.34 – 7.30 (m, 2H), 7.29 – 7.24 (m, 2H), 7.20 – 7.13 (m, 2H), 4.51 (q,  $J$  = 6.4 Hz, 1H), 4.46 (d,  $J$  = 12.0 Hz, 1H), 4.33 (d,  $J$  = 12.0 Hz, 1H), 1.50 (d,  $J$  = 6.5 Hz, 3H). **<sup>13</sup>C NMR** (126 MHz, Chloroform-*d*)  $\delta$  160.07 (d,  $J$  = 248.5 Hz), 145.44 (d,  $J$  = 6.9 Hz), 137.02, 135.75 (d,  $J$  = 1.1 Hz), 133.50, 131.02 (d,  $J$  = 3.8 Hz), 129.12 (d,  $J$  = 3.5 Hz), 128.67 (d,  $J$  = 14.2 Hz), 128.51, 128.42, 128.31, 127.82, 122.31 (d,  $J$  = 3.3 Hz), 113.97 (d,  $J$  = 23.3 Hz), 76.80 (d,  $J$  = 1.5 Hz), 69.92, 24.12. **<sup>19</sup>F NMR** (377 MHz, Chloroform-*d*)  $\delta$  -117.68. **HRSM** (FTMS + *p* ESI) *m/z*: [M – C<sub>7</sub>H<sub>6</sub>ClO]<sup>+</sup> calculated for C<sub>21</sub>H<sub>18</sub>ClO, 199.0918; found, 199.0916.

## (3-(1-(benzyloxy)ethyl)phenyl)(phenyl)methanone (44)

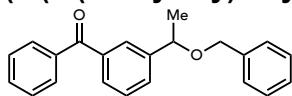

Prepared according to **General Procedure B** with phenylmethanol (0.093 mL, 3.0 equiv, 0.9 mmol) and 2-(3-benzoylphenyl)propanoic acid (0.076 g, 1.0 equiv, 0.3 mmol). Purification by flash chromatography on silica gel, eluting with 5% ethyl acetate in hexanes, afforded the product as a clear oil (80 mg, 76% yield). **<sup>1</sup>H NMR** (500 MHz, CDCl<sub>3</sub>)  $\delta$  7.82 – 7.79 (m, 3H), 7.74 – 7.71 (m, 1H), 7.64 – 7.56 (m, 2H), 7.50 – 7.46 (m, 3H), 7.36 – 7.24 (m, 5H), 4.58 (q,  $J$  = 6.5 Hz, 1H), 4.48 (d,  $J$  = 11.8 Hz, 1H), 4.35 (d,  $J$  = 11.8 Hz, 1H), 1.50 (d,  $J$  = 6.4 Hz, 3H). **<sup>13</sup>C NMR** (126 MHz, CDCl<sub>3</sub>)  $\delta$  196.83, 144.34, 138.44, 137.98, 137.75, 132.58, 130.42, 130.18, 129.49, 128.69, 128.54, 128.44, 128.10, 127.81, 127.73, 77.01, 70.70, 24.25. **HRSM** (FTMS + *p* ESI) *m/z*: [M + H]<sup>+</sup> calculated for C<sub>22</sub>H<sub>20</sub>O<sub>2</sub>H, 317.1536; found, 317.1530.

## 2-(4-(1-(allyloxy)ethyl)benzyl)cyclopentan-1-one (45)

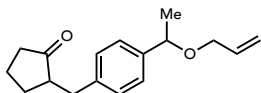

Prepared according to **General Procedure B** with prop-2-en-1-ol (0.061 mL, 3.0 equiv, 0.9 mmol) and 2-(4-((2-oxocyclopentyl)methyl)phenyl)propanoic acid (0.074 g, 1.0 equiv, 0.3 mmol). Purification by flash chromatography on silica gel, eluting with 10% ethyl acetate in hexanes, afforded the product as a clear oil (45 mg, 60% yield). **<sup>1</sup>H NMR** (500 MHz, CDCl<sub>3</sub>) δ 7.23 (d, *J* = 8.0 Hz, 2H), 7.14 (d, *J* = 8.0 Hz, 2H), 5.96 – 5.85 (m, 1H), 5.24 (dd, *J* = 17.2, 1.7 Hz, 1H), 5.15 (dd, *J* = 10.4, 1.6 Hz, 1H), 4.44 (q, *J* = 6.5 Hz, 1H), 3.88 (dd, *J* = 12.9, 5.2 Hz, 1H), 3.79 (dd, *J* = 12.7, 6.0 Hz, 1H), 3.14 (dd, *J* = 13.9, 4.1 Hz, 1H), 2.52 (dd, *J* = 13.9, 9.5 Hz, 1H), 2.41 – 2.27 (m, 2H), 2.19 – 2.04 (m, 2H), 2.02 – 1.92 (m, 1H), 1.79 – 1.69 (m, 1H), 1.63 – 1.52 (m, 1H), 1.44 (d, *J* = 6.5 Hz, 3H). **<sup>13</sup>C NMR** (126 MHz, CDCl<sub>3</sub>) δ 220.32, 141.74, 139.31, 135.21, 129.07, 126.47, 116.78, 77.11, 69.50, 51.16, 51.15, 38.32, 35.44, 29.40, 24.11, 24.10, 20.69. **HRSMS** (FTMS + p ESI) *m/z*: [M + H]<sup>+</sup> calculated for C<sub>17</sub>H<sub>22</sub>O<sub>2</sub>H, 259.1693; found, 259.1690.

#### cyclohexyl(1-phenylethyl)sulfane (46)

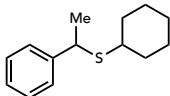

Prepared according to **General Procedure B** with cyclohexanethiol (0.110 mL, 3.0 equiv, 0.9 mmol) and 2-phenylpropanoic acid (0.041 mL, 1.0 equiv, 0.3 mmol). The crude reaction mixture was purified by reverse phase flash chromatography over C18 functionalized silica with H<sub>2</sub>O/MeOH. The product eluted around ~75% MeOH. Product-containing fractions were combined, diluted with EtOAc, and washed with brine (1x). The aqueous layer was washed with EtOAc (3x). The combined organic layers were dried over MgSO<sub>4</sub>, filtered through a plug of celite, and concentrated under reduced pressure to afford the product as a clear oil (35 mg, 53% yield). **<sup>1</sup>H NMR** (500 MHz, Chloroform-*d*) δ 7.38 – 7.27 (m, 4H), 7.24 – 7.18 (m, 1H), 4.04 (q, *J* = 7.0 Hz, 1H), 2.39 (tt, *J* = 10.5, 3.6 Hz, 1H), 2.02 – 1.87 (m, 1H), 1.77 – 1.69 (m, 2H), 1.70 – 1.61 (m, 1H), 1.55 (d, *J* = 7.0 Hz, 3H), 1.43 – 1.12 (m, 6H). **<sup>13</sup>C NMR** (126 MHz, CDCl<sub>3</sub>) δ 144.87, 128.56, 127.28, 126.99, 42.92, 42.61, 34.02, 33.45, 26.14, 26.00, 23.27. The spectral data matched those previously reported.<sup>15</sup>

#### benzyl ((1*R*,3*R*)-3-(1-(4-isobutylphenyl)ethoxy)cyclopentyl)carbamate (47)

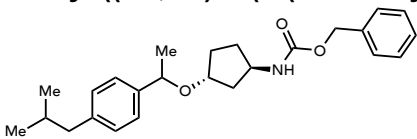

An oven-dried 4-mL vial equipped with a stir bar is charged with Fe(OTf)<sub>3</sub> (0.152 g, 3.0 equiv, 0.3 mmol), Na<sub>3</sub>PO<sub>4</sub> (0.050 g, 3.0 equiv, 0.3 mmol), benzyl ((1*R*,3*R*)-3-hydroxycyclopentyl)carbamate (0.071 g, 3.0 equiv, 0.3 mmol), and ibuprofen (0.021 g, 1.0 equiv, 0.3 mmol). The vial was purged with nitrogen and the solids suspended in methylenechloride (2.0 mL, 0.05 M). The vial is irradiated at 427 nm with one 40 W Kessil Lamp PR160 lamp in a EvoluChem photoreactor box for 24 h at room temperature. After 24 h, the crude reaction mixture is diluted with 2.0 mL saturated aqueous NH<sub>4</sub>Cl and extracted with EtOAc (2 x 5 mL). The combined organics were dried over Na<sub>2</sub>SO<sub>4</sub>, filtered, and concentrated under reduced pressure. The crude product was purified by flash chromatography on silica gel, eluting with a gradient of 0-20% EtOAc/heptane, to deliver the product as a clear oil (27 mg, 68% yield). **<sup>1</sup>H NMR** (500 MHz, CDCl<sub>3</sub>) δ 7.39 – 7.27 (m, 5H), 7.18 (d, *J* = 7.9 Hz, 2H), 7.10 (d, *J* = 8.0 Hz, 2H), 5.20 – 4.99 (m, *J* = 7.0 Hz, 2H), 4.71 – 4.48 (m, 1H), 4.45 – 4.34 (m, 1H), 4.26 – 4.09 (m, 1H), 3.93 – 3.79 (m, 1H), 2.46 (d, *J* = 7.2 Hz, 2H), 2.24 – 1.96 (m, 2H), 1.95 – 1.77 (m, 2H), 1.66 – 1.44 (m, 2H), 1.38 (d, *J* = 6.5 Hz, 3H), 1.35 – 1.19 (m, 1H), 0.90 (d, *J* = 6.6 Hz, 6H). **<sup>13</sup>C NMR** (126 MHz, CDCl<sub>3</sub>) δ 157.30, 141.53, 141.49,



140.92, 140.90, 136.73, 129.39, 129.25, 129.24, 128.68, 128.66, 128.33, 128.25, 128.23, 126.14, 126.11, 77.36, 76.44, 75.67, 75.50, 45.29, 31.64, 30.55, 30.34, 24.64, 24.54, 22.57. **HRSM** (FTMS + p ESI) m/z: [M + H]<sup>+</sup> calculated for C<sub>25</sub>H<sub>33</sub>NO<sub>3</sub>H, 396.2533; found, 396.2525.

#### 7-(1-((4-chlorobenzyl)oxy)ethyl)-5H-chromeno[2,3-b]pyridine (48)

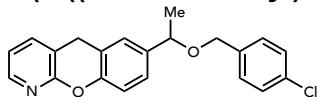

Prepared according to **General Procedure B** with (4-chlorophenyl)methanol (0.128 g, 3.0 equiv, 0.9 mmol) and 2-(5H-chromeno[2,3-b]pyridine-7-yl)propanoic acid (0.077 g, 1.0 equiv, 0.3 mmol). Pyridine (0.072 mL, 3.0 equiv, 0.9 mmol) was employed as the base in place of K<sub>2</sub>HPO<sub>4</sub>. Purification by flash chromatography on silica gel, eluting with gradient of 0-20% ethyl acetate in hexanes, afforded the product as a clear oil (54 mg, 48% yield). **<sup>1</sup>H NMR** (500 MHz, Chloroform-*d*) δ 8.22 – 8.14 (m, 1H), 7.55 (ddt, *J* = 7.3, 2.0, 1.1 Hz, 1H), 7.33 – 7.28 (m, 2H), 7.26 – 7.21 (m, 2H), 7.19 – 7.13 (m, 3H), 7.04 (dd, *J* = 7.3, 4.8 Hz, 1H), 4.45 (q, *J* = 6.5 Hz, 1H), 4.40 (d, *J* = 12.0 Hz, 1H), 4.28 (d, *J* = 12.1 Hz, 1H), 4.12 (s, 2H), 1.47 (d, *J* = 6.4 Hz, 3H). **<sup>13</sup>C NMR** (126 MHz, CDCl<sub>3</sub>) δ 158.64, 151.29, 146.89, 139.04, 138.52, 137.21, 133.40, 129.09, 128.67, 126.47, 126.31, 119.99, 119.77, 117.44, 115.52, 76.98, 69.65, 28.38, 24.23. **HRSM** (FTMS + p ESI) m/z: [M + H]<sup>+</sup> calculated for C<sub>21</sub>H<sub>18</sub>ClNO<sub>2</sub>H, 352.1099; found, 352.1096.

#### 4-methoxy-N-(1-phenylethyl)benzenesulfonamide (49)

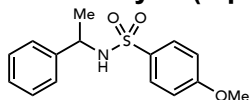

Prepared according to **General Procedure D** with 4-methoxybenzenesulfonamide (0.112 g, 3.0 equiv, 0.60 mmol) and 2-phenylpropanoic acid (0.030 g, 1.0 equiv, 0.20 mmol). Purification by flash chromatography on silica gel, eluting with 30% ethyl acetate in hexanes, afforded the product as a clear oil (57.6 mg, 99% yield). The spectral data matched those previously reported.<sup>16</sup> **<sup>1</sup>H NMR** (500 MHz, CDCl<sub>3</sub>) δ 7.65 (d, *J* = 8.8 Hz, 2H), 7.24 – 7.16 (m, 3H), 7.15 – 7.06 (m, 2H), 6.85 (d, *J* = 8.8 Hz, 2H), 4.73 (br m, 1H, N–H), 4.45 (p, *J* = 6.8 Hz, 1H), 3.84 (s, 3H), 1.43 (d, *J* = 6.8 Hz, 3H). **<sup>13</sup>C NMR** (126 MHz, CDCl<sub>3</sub>) δ 162.83, 142.17, 132.41, 129.36, 128.73, 127.67, 126.27, 114.13, 55.73, 53.75, 23.73. **HRMS** (FTMS + p ESI) m/z: [M–H]<sup>–</sup> calculated for C<sub>15</sub>H<sub>16</sub>NO<sub>3</sub>S, 290.0856; found, 290.0858.

#### N-(1-phenylethyl)-4-(trifluoromethyl)benzenesulfonamide (50)

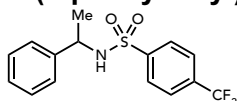

Prepared according to **General Procedure D** with 4-(trifluoromethyl)benzenesulfonamide (0.135 g, 3.0 equiv, 0.60 mmol) and 2-phenylpropanoic acid (0.030 g, 1.0 equiv, 0.20 mmol). Purification by flash chromatography on silica gel, eluting with 20% ethyl acetate in hexanes, afforded the product as a white solid (65.5 mg, 99% yield). The spectral data matched those previously reported.<sup>16</sup> **<sup>1</sup>H NMR** (500 MHz, CDCl<sub>3</sub>) δ 7.74 (d, *J* = 8.1 Hz, 2H), 7.57 (d, *J* = 8.1 Hz, 2H), 7.18 – 7.10 (m, 3H), 7.07 – 6.96 (m, 2H), 4.97 (d, *J* = 7.0 Hz, 1H, N–H), 4.56 (m, 1H), 1.47 (d, *J* = 6.9 Hz, 3H). **<sup>13</sup>C NMR** (126 MHz, CDCl<sub>3</sub>) δ 144.38, 141.27, 134.09 (q, *J* = 32.9 Hz), 128.77, 127.92, 127.64, 126.67, 125.98 (q, *J* = 3.7 Hz), 123.37 (q, *J* = 272.8 Hz), 54.24, 23.83. **<sup>19</sup>F NMR** (377 MHz, CDCl<sub>3</sub>) δ -63.20 (s, 3F). **mp**: 117.8 – 118.6 °C (lit.<sup>16</sup> 118.7 – 120.1 °C). **HRMS** (FTMS + p ESI) m/z: [M–H]<sup>–</sup> calculated for C<sub>15</sub>H<sub>13</sub>F<sub>3</sub>NO<sub>2</sub>S, 328.0625; found, 328.0625.

#### N-(adamantan-1-yl)-4-methylbenzenesulfonamide (51)

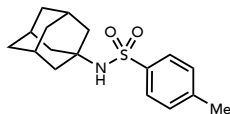

Prepared according to **General Procedure D** with *p*-toluenesulfonamide (0.051 g, 3.0 equiv, 0.60 mmol) and adamantane-1-carboxylic acid (0.036 g, 1.0 equiv, 0.20 mmol). Fe(OTf)<sub>3</sub> (0.302 g, 3.0 equiv, 0.60 mmol) and NaOAc (0.049 g, 3.0 equiv, 0.60 mmol) were used in place of FeCl<sub>3</sub> and Na<sub>3</sub>PO<sub>4</sub>, respectively. Purification by flash chromatography on silica gel, eluting with 20% ethyl acetate in hexanes, afforded the product as a white solid (42.5 mg, 70% yield). The spectral data matched those previously reported.<sup>17</sup> **<sup>1</sup>H NMR** (500 MHz, CDCl<sub>3</sub>) δ 7.78 (d, *J* = 8.3 Hz, 2H), 7.28 (d, *J* = 8.3 Hz, 2H), 4.65 (s, 1H), 2.42 (s, 3H), 2.20 – 1.97 (m, 3H), 1.91 – 1.74 (m, 6H), 1.69 – 1.46 (m, 6H). **<sup>13</sup>C NMR** (126 MHz, CDCl<sub>3</sub>) δ 142.83, 141.27, 129.56, 127.06, 55.19, 43.20, 35.99, 29.62, 21.63. **mp**: 166.8 – 167.9 °C (lit.<sup>18</sup> 168 – 169.5 °C). **HRMS** (FTMS + *p* ESI) *m/z*: [M-H]<sup>-</sup> calculated for C<sub>17</sub>H<sub>22</sub>NO<sub>2</sub>S, 304.1377; found, 304.1377.

#### 4-methoxy-*N*-(1-methylcyclohexyl)benzenesulfonamide (52)

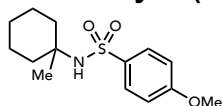

Prepared according to **General Procedure D** with 4-methoxybenzenesulfonamide (0.056 g, 3.0 equiv, 0.60 mmol) and 1-methylcyclohexane-1-carboxylic acid (0.028 g, 1.0 equiv, 0.20 mmol). Fe(OTf)<sub>3</sub> (0.302 g, 3.0 equiv, 0.60 mmol) and NaOAc (0.049 g, 3.0 equiv, 0.60 mmol) were used in place of FeCl<sub>3</sub> and Na<sub>3</sub>PO<sub>4</sub>, respectively. Purification by flash chromatography on silica gel, eluting with 20–30% ethyl acetate in hexanes, afforded the product as a clear oil (24.3 mg, 43% yield). **<sup>1</sup>H NMR** (500 MHz, CDCl<sub>3</sub>) δ 7.82 (d, *J* = 8.9 Hz, 2H), 6.94 (d, *J* = 8.9 Hz, 2H), 4.48 (s, 1H), 3.86 (s, 3H), 1.76 – 1.30 (m, 10H), 1.19 (s, 3H). **<sup>13</sup>C NMR** (126 MHz, CDCl<sub>3</sub>) δ 162.57, 135.64, 129.16, 114.10, 56.92, 55.70, 38.59, 35.53, 25.38, 21.99. **HRMS** (FTMS + *p* ESI) *m/z*: [M-H]<sup>-</sup> calculated for C<sub>14</sub>H<sub>20</sub>NO<sub>3</sub>S, 282.1169; found, 282.1169.

#### *N*-(*tert*-butyl)-4-methoxybenzenesulfonamide (53)

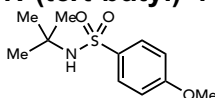

Prepared according to **General Procedure D** with 4-methoxybenzenesulfonamide (0.056 g, 3.0 equiv, 0.90 mmol) and pivalic acid (0.031 g, 1.0 equiv, 0.30 mmol). NaOAc (0.074 g, 3.0 equiv, 0.90 mmol) was used in place of Na<sub>3</sub>PO<sub>4</sub>. Purification by flash chromatography on silica gel, eluting with 15% ethyl acetate in hexanes, afforded the product as a white solid (21 mg, 29% yield). The spectral data matched those previously reported.<sup>19</sup> **<sup>1</sup>H NMR** (400 MHz, Chloroform-*d*) δ 7.75 (d, *J* = 8.8 Hz, 2H), 6.87 (d, *J* = 8.8 Hz, 2H), 4.58 (s, 1H), 3.79 (s, 3H), 1.14 (s, 9H). **<sup>13</sup>C NMR** (101 MHz, CDCl<sub>3</sub>) δ 162.60, 135.23, 129.22, 114.12, 55.70, 54.61, 30.28.

#### *N*-benzhydryl-1-(benzo[*d*]isoxazol-3-yl)methanesulfonamide (54)

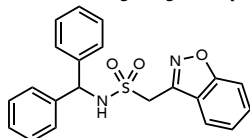

Prepared according to **General Procedure D** with zonisamide (0.042 g, 3.0 equiv, 0.60 mmol) and diphenylacetic acid (0.042 g, 1.0 equiv, 0.20 mmol). Fe(OTf)<sub>3</sub> (0.302 g, 3.0 equiv, 0.60 mmol) was used in place of FeCl<sub>3</sub>. Purification by flash chromatography on silica gel, eluting with 20–30% ethyl acetate in hexanes, afforded the product as a white solid (55.9 mg, 74% yield). **<sup>1</sup>H NMR** (500 MHz, CDCl<sub>3</sub>) δ 7.79 (d, *J* = 8.1 Hz, 1H), 7.64 – 7.50 (m, 2H), 7.42 – 7.27 (m, 10H), 5.81 (d,

$J = 7.2$  Hz, 1H), 5.30 (d,  $J = 7.2$  Hz, 1H), 4.45 (s, 2H).  $^{13}\text{C NMR}$  (126 MHz,  $\text{CDCl}_3$ )  $\delta$  163.72, 149.60, 140.31, 130.51, 129.01, 128.22, 127.68, 124.27, 122.47, 120.98, 110.04, 62.06, 50.72. **mp:** 172.6 – 173.0 °C. **HRMS** (FTMS + p ESI)  $m/z$ :  $[\text{M}-\text{H}]^-$  calculated for  $\text{C}_{21}\text{H}_{17}\text{N}_2\text{O}_3\text{S}$ , 377.0965; found, 377.0966.

**((3aR,5aS,8aS,8bR)-2,2,7,7-tetramethyltetrahydro-3aH-bis([1,3]dioxolo)[4,5-b:4',5'-d]pyran-3a-yl)methyl benzhydrysulfamate (55)**

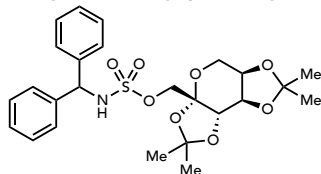

Prepared according to **General Procedure D** with topirimate (0.102 g, 3.0 equiv, 0.60 mmol) and diphenylacetic acid (0.042 g, 1.0 equiv, 0.20 mmol).  $\text{Fe}(\text{OTf})_3$  (0.302 g, 3.0 equiv, 0.60 mmol) was used in place of  $\text{FeCl}_3$ . Purification by flash chromatography on silica gel, eluting with 20–30% ethyl acetate in hexanes, afforded the product as a white solid (53.5 mg, 53% yield).  $^1\text{H NMR}$  (500 MHz,  $\text{CDCl}_3$ )  $\delta$  7.41 – 7.27 (m, 10H), 5.75 (d,  $J = 6.6$  Hz, 1H), 5.20 (d,  $J = 6.6$  Hz, 1H), 4.54 (dd,  $J = 7.9, 2.6$  Hz, 1H), 4.19 (dd,  $J = 7.9, 1.7$  Hz, 1H), 4.16 (d,  $J = 2.6$  Hz, 1H), 4.10 (d,  $J = 10.6$  Hz, 1H), 4.02 (d,  $J = 10.6$  Hz, 1H), 3.81 (dd,  $J = 13.0, 1.9$  Hz, 1H), 3.66 (dd,  $J = 13.0, 0.8$  Hz, 1H), 1.48 (s, 3H), 1.44 (s, 3H), 1.33 (s, 3H), 1.29 (s, 3H).  $^{13}\text{C NMR}$  (126 MHz,  $\text{CDCl}_3$ )  $\delta$  140.69, 129.00, 128.14, 127.52, 109.32, 109.30, 100.97, 70.79, 70.53, 70.25, 70.06, 62.18, 61.45, 26.55, 26.03, 25.23, 24.22. **mp:** 123.0 – 125.0 °C. **HRMS** (FTMS + p ESI)  $m/z$ :  $[\text{M}-\text{H}]^-$  calculated for  $\text{C}_{25}\text{H}_{30}\text{NO}_8\text{S}$ , 504.1698; found, 504.1699.

**4-(1,1-dioxido-1,2-thiazinan-2-yl)-N-(1-(4-(2-oxocyclopentyl)methyl)phenyl)ethyl)benzenesulfonamide (56)**

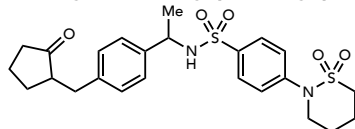

Prepared according to **General Procedure D** with sultiame (0.087 g, 3.0 equiv, 0.60 mmol) and loxoprofen (0.049 g, 1.0 equiv, 0.20 mmol).  $\text{Fe}(\text{OTf})_3$  (0.302 g, 3.0 equiv, 0.60 mmol) was used in place of  $\text{FeCl}_3$ . Purification by flash chromatography on silica gel, eluting with 70% ethyl acetate in hexanes, afforded the product as a white solid (51.0 mg, 52% yield, 1:1 *d.r.*).  $^1\text{H NMR}$  (500 MHz,  $\text{CDCl}_3$ )  $\delta$  7.68 (dd,  $J = 8.7, 3.4$  Hz, 2H), 7.32 (dd,  $J = 8.7, 3.4$  Hz, 2H), 7.07 – 6.97 (m, 4H), 4.77 (d,  $J = 6.9$  Hz, 1H), 4.47 (td,  $J = 6.9, 3.5$  Hz, 1H), 3.94 – 3.70 (m, 2H), 3.38 – 3.17 (m, 2H), 3.07 (ddd,  $J = 13.9, 4.3, 1.7$  Hz, 1H), 2.47 (ddd,  $J = 14.1, 9.5, 1.4$  Hz, 1H), 2.42 – 2.27 (m, 4H), 2.18 – 2.01 (m, 2H), 1.98 – 1.88 (m, 3H), 1.74 (m, 1H), 1.56 – 1.46 (m, 1H), 1.43 (d,  $J = 6.9$  Hz, 3H).  $^{13}\text{C NMR}$  (126 MHz,  $\text{CDCl}_3$ )  $\delta$  220.28, 144.33, 144.32, 139.77, 139.74, 139.73, 139.69, 138.91, 138.88, 129.26, 128.10, 126.36, 126.34, 53.67, 53.66, 53.25, 51.03, 51.01, 50.91, 38.29, 35.28, 35.26, 29.84, 29.40, 29.37, 24.55, 24.28, 23.70, 23.67, 20.66 (mixture of diastereomers). **mp:** 239 °C (decomp.). **HRMS** (FTMS + p ESI)  $m/z$ :  $[\text{M}-\text{H}]^-$  calculated for  $\text{C}_{24}\text{H}_{29}\text{N}_2\text{O}_5\text{S}_2$ , 489.1523; found, 489.1522.

**N-(1-(2-fluoro-[1,1'-biphenyl]-4-yl)ethyl)-4-(5-(p-tolyl)-3-(trifluoromethyl)-1H-pyrazol-1-yl)benzenesulfonamide (57)**

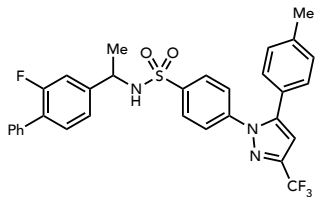

Prepared according to **General Procedure D** with celecoxib (0.114 g, 3.0 equiv, 0.60 mmol) and flurbiprofen (0.049 g, 1.0 equiv, 0.20 mmol). Purification by flash chromatography on silica gel, eluting with 30% ethyl acetate in hexanes, afforded the product as a white solid (74.8 mg, 64% yield). **<sup>1</sup>H NMR** (500 MHz, CDCl<sub>3</sub>) δ 7.71 (d, *J* = 8.7 Hz, 2H), 7.48 – 7.33 (m, 7H), 7.27 (t, *J* = 7.9 Hz, 1H), 7.14 (d, *J* = 8.1 Hz, 2H), 7.05 (d, *J* = 8.1 Hz, 2H), 6.97 – 6.87 (m, 2H), 6.72 (s, 1H), 4.85 (d, *J* = 6.8 Hz, 1H), 4.55 (p, *J* = 6.8 Hz, 1H), 2.35 (s, 3H), 1.47 (d, *J* = 6.8 Hz, 3H). **<sup>13</sup>C NMR** (126 MHz, CDCl<sub>3</sub>) δ 159.72 (d, *J* = 249.2 Hz), 145.35, 144.26 (q, *J* = 38.6 Hz), 143.07 (d, *J* = 7.1 Hz), 142.54, 140.10, 139.93, 135.21, 131.17, 131.14, 129.86, 129.00 (d, *J* = 2.9 Hz), 128.84, 128.62, 128.18, 127.99, 125.87, 125.32, 122.21 (d, *J* = 3.4 Hz), 121.23 (q, *J* = 269.1 Hz), 114.09 (d, *J* = 23.8 Hz), 106.53 (d, *J* = 2.2 Hz), 53.31, 23.57, 21.44. **<sup>19</sup>F NMR** (377 MHz, CDCl<sub>3</sub>) δ -62.37 (s, 3F), -117.00 (s, 1F). **mp**: 111.3 – 112.9 °C. **HRMS** (FTMS + p ESI) *m/z*: [M-H]<sup>-</sup> calculated for C<sub>31</sub>H<sub>24</sub>F<sub>4</sub>N<sub>3</sub>O<sub>2</sub>S, 578.1531; found, 578.1535.

#### 4-(3-(difluoromethyl)-5-(3-fluoro-4-methoxyphenyl)-1H-pyrazol-1-yl)-N-(1-(3-phenoxyphenyl)ethyl)benzenesulfonamide (58)

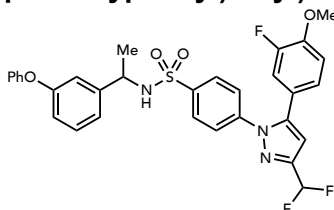

Prepared according to **General Procedure D** with deracoxib (0.119 g, 3.0 equiv, 0.60 mmol) and fenoprofen (0.048 g, 1.0 equiv, 0.20 mmol). Purification by flash chromatography on silica gel, eluting with 30% ethyl acetate in hexanes, afforded the product as a white solid (53.1 mg, 45% yield). **<sup>1</sup>H NMR** (500 MHz, CDCl<sub>3</sub>) δ 7.71 (d, *J* = 8.7 Hz, 2H), 7.34 (d, *J* = 8.7 Hz, 2H), 7.32 – 7.28 (m, 2H), 7.18 (t, *J* = 7.9 Hz, 1H), 7.13 – 7.06 (m, 1H), 6.97 (dd, *J* = 11.5, 2.0 Hz, 1H), 6.94 – 6.89 (m, 3H), 6.89 – 6.84 (m, 2H), 6.82 – 6.76 (m, 2H), 6.70 (d, *J* = 54.8 Hz, 1H), 6.69 (m, 1H), 4.70 (d, *J* = 6.9 Hz, 1H), 4.49 (t, *J* = 6.9 Hz, 1H), 3.90 (s, 3H), 1.43 (d, *J* = 6.9 Hz, 3H). **<sup>13</sup>C NMR** (126 MHz, CDCl<sub>3</sub>) δ 157.81, 156.76, 152.25 (d, *J* = 248.5 Hz), 148.72 (d, *J* = 10.4 Hz), 148.33 (d, *J* = 30.0 Hz), 143.84, 143.80, 142.46, 140.06, 130.19, 129.96, 128.24, 125.30 (d, *J* = 3.7 Hz), 125.06, 123.77, 121.90 (d, *J* = 7.0 Hz), 120.89, 119.21, 117.87, 116.76 (d, *J* = 19.8 Hz), 116.53, 113.71 (d, *J* = 2.3 Hz), 111.12 (t, *J* = 234.5 Hz), 105.98, 56.39, 53.70, 23.70. **<sup>19</sup>F NMR** (377 MHz, CDCl<sub>3</sub>) δ -112.28 (s, 2F), -133.28 (s, 1F). **mp**: 115.9 – 117.8 °C. **HRMS** (FTMS + p ESI) *m/z*: [M-H]<sup>-</sup> calculated for C<sub>31</sub>H<sub>25</sub>F<sub>3</sub>N<sub>3</sub>O<sub>4</sub>S, 592.1523; found, 592.1528.

#### N-(1-(4-isobutylphenyl)ethyl)-4-(5-methyl-3-phenylisoxazol-4-yl)benzenesulfonamide (59)

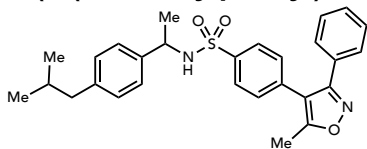

Prepared according to **General Procedure D** with valdecoxib (0.094 g, 3.0 equiv, 0.60 mmol) and ibuprofen (0.041 g, 1.0 equiv, 0.20 mmol). Fe(OTf)<sub>3</sub> (0.302 g, 3.0 equiv, 0.60 mmol) was used in place of FeCl<sub>3</sub>. Purification by flash chromatography on silica gel, eluting with 30% ethyl acetate in hexanes, afforded the product as a clear oil (87.8 mg, 92% yield). **<sup>1</sup>H NMR** (500 MHz, CDCl<sub>3</sub>)

$\delta$  7.71 (d,  $J$  = 8.4 Hz, 2H), 7.46 – 7.30 (m, 5H), 7.18 (d,  $J$  = 8.4 Hz, 2H), 7.01 (d,  $J$  = 8.3 Hz, 2H), 6.97 (d,  $J$  = 8.3 Hz, 2H), 4.86 (d,  $J$  = 5.1 Hz, 1H), 4.53 (m, 1H), 2.46 (s, 3H), 2.37 (d,  $J$  = 7.2 Hz, 2H), 1.86 – 1.68 (m, 1H), 1.47 (d,  $J$  = 6.8 Hz, 3H), 0.83 (d,  $J$  = 6.6 Hz, 6H).  $^{13}\text{C NMR}$  (126 MHz,  $\text{CDCl}_3$ )  $\delta$  167.24, 161.17, 141.41, 140.13, 139.24, 134.99, 130.14, 129.85, 129.41, 128.81, 128.65, 128.58, 127.59, 126.01, 114.67, 53.67, 45.08, 30.28, 23.69, 22.42, 11.84. **HRMS** (FTMS + p ESI)  $m/z$ :  $[\text{M}-\text{H}]^-$  calculated for  $\text{C}_{28}\text{H}_{29}\text{N}_2\text{O}_3\text{S}$ , 473.1904; found, 473.1905.

### 1-(1-(2-fluoro-[1,1'-biphenyl]-4-yl)ethyl)pyrrolidine (60)

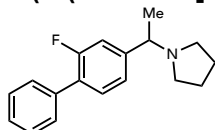

Prepared according to **General Procedure E** with pyrrolidine (81.9  $\mu\text{L}$ , 10 equiv, 1.0 mmol) and flurbiprofen (0.024 g, 1.0 equiv, 0.10 mmol). Purification by flash chromatography on silica gel, eluting with 5-20% ethyl acetate in hexanes, afforded the product as a clear oil (18.3 mg, 68% yield).  $^1\text{H NMR}$  (500 MHz,  $\text{CDCl}_3$ )  $\delta$  7.59 – 7.52 (m, 2H), 7.49 – 7.40 (m, 2H), 7.40 – 7.32 (m, 2H), 7.23 – 7.12 (m, 2H), 3.23 (q,  $J$  = 6.7 Hz, 1H), 2.75 – 2.48 (m, 2H), 2.47 – 2.29 (m, 2H), 1.95 – 1.69 (m, 4H), 1.42 (d,  $J$  = 6.7 Hz, 3H).  $^{13}\text{C NMR}$  (126 MHz,  $\text{CDCl}_3$ )  $\delta$  159.90 (d,  $J$  = 247.6 Hz), 147.82, 136.02, 130.58 (d,  $J$  = 3.8 Hz), 129.11 (d,  $J$  = 3.0 Hz), 128.53, 127.59, 127.41, 123.18 (d,  $J$  = 3.2 Hz), 114.84 (d,  $J$  = 23.2 Hz), 65.39, 53.03, 23.60, 23.30.  $^{19}\text{F NMR}$  (377 MHz,  $\text{CDCl}_3$ )  $\delta$  -118.52 (s, 1F). **HRMS** (FTMS + p ESI)  $m/z$ :  $[\text{M}+\text{H}]^+$  calculated for  $\text{C}_{18}\text{H}_{21}\text{FN}$ , 270.1652; found, 270.1647.

### methyl 1-(1-(2-fluoro-[1,1'-biphenyl]-4-yl)ethyl)piperidine-4-carboxylate (61)

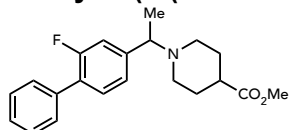

Prepared according to **General Procedure E** with methyl piperidine-4-carboxylate (94.4  $\mu\text{L}$ , 7.0 equiv, 0.70 mmol) and flurbiprofen (0.024 g, 1.0 equiv, 0.10 mmol). Purification by flash chromatography on silica gel, eluting with 5-20% ethyl acetate in hexanes, afforded the product as a clear oil (27.9 mg, 82% yield).  $^1\text{H NMR}$  (500 MHz,  $\text{CDCl}_3$ )  $\delta$  7.55 (d,  $J$  = 8.4 Hz, 2H), 7.44 (t,  $J$  = 7.6 Hz, 2H), 7.40 – 7.32 (m, 2H), 7.18 – 7.11 (m, 2H), 3.67 (s, 3H), 3.45 (q,  $J$  = 6.7 Hz, 1H), 3.08 – 2.91 (m, 1H), 2.87 – 2.76 (m, 1H), 2.27 (tt,  $J$  = 11.3, 4.1 Hz, 1H), 2.12 – 1.98 (m, 2H), 1.96 – 1.89 (m, 1H), 1.89 – 1.82 (m, 1H), 1.81 – 1.68 (m, 2H), 1.37 (d,  $J$  = 6.7 Hz, 3H).  $^{13}\text{C NMR}$  (126 MHz,  $\text{CDCl}_3$ )  $\delta$  175.86, 159.88 (d,  $J$  = 247.6 Hz), 146.31 (d,  $J$  = 7.8 Hz), 135.96, 130.45 (d,  $J$  = 3.8 Hz), 129.10 (d,  $J$  = 3.0 Hz), 128.55, 127.63, 127.44 (d,  $J$  = 13.7 Hz), 123.55 (d,  $J$  = 3.2 Hz), 115.11 (d,  $J$  = 23.1 Hz), 64.04, 51.74, 50.53, 49.59, 41.41, 28.73, 19.17.  $^{19}\text{F NMR}$  (377 MHz,  $\text{CDCl}_3$ )  $\delta$  -118.45 (s, 1F). **HRMS** (FTMS + p ESI)  $m/z$ :  $[\text{M}+\text{H}]^+$  calculated for  $\text{C}_{21}\text{H}_{25}\text{FNO}_2$ , 342.1864; found, 342.1857.

### 1-(1-(2-fluoro-[1,1'-biphenyl]-4-yl)ethyl)-4-(pyridin-2-yl)piperazine (62)

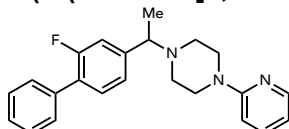

Prepared according to **General Procedure E** with 1-(2-pyridyl)piperazine (106.4  $\mu\text{L}$ , 7.0 equiv, 0.70 mmol) and flurbiprofen (0.025 g, 1.0 equiv, 0.10 mmol). Purification by flash chromatography on silica gel, eluting with 5-20% ethyl acetate in hexanes, afforded the product as a white solid (24.5 mg, 68% yield).  $^1\text{H NMR}$  (500 MHz,  $\text{CDCl}_3$ )  $\delta$  8.19 (ddd,  $J$  = 4.9, 2.0, 0.9 Hz, 1H), 7.56 (dt,  $J$  = 8.0, 1.5 Hz, 2H), 7.51 – 7.42 (m, 3H), 7.42 – 7.33 (m, 2H), 7.19 (d,  $J$  = 10.2 Hz, 2H), 6.74 –

6.56 (m, 2H), 3.54 (ddd,  $J = 11.0, 6.9, 3.8$  Hz, 4H), 3.46 (q,  $J = 6.7$  Hz, 1H), 2.64 (td,  $J = 7.0, 3.4$  Hz, 2H), 2.56 (td,  $J = 7.0, 3.4$  Hz, 2H), 1.42 (d,  $J = 6.7$  Hz, 3H).  $^{13}\text{C NMR}$  (126 MHz,  $\text{CDCl}_3$ )  $\delta$  159.93 (d,  $J = 247.9$  Hz), 159.73, 148.13, 146.09 (d,  $J = 7.1$  Hz), 137.54, 135.91, 130.61 (d,  $J = 3.8$  Hz), 129.11 (d,  $J = 3.0$  Hz), 128.56, 127.68, 127.60, 123.65 (d,  $J = 3.1$  Hz), 115.18 (d,  $J = 23.2$  Hz), 113.35, 107.14, 64.31, 50.46, 45.62, 19.76.  $^{19}\text{F NMR}$  (377 MHz,  $\text{CDCl}_3$ )  $\delta$  -118.25 (s, 1F). **mp**: 109.3 – 110.8 °C. **HRMS** (FTMS + p ESI)  $m/z$ :  $[\text{M}+\text{H}]^+$  calculated for  $\text{C}_{23}\text{H}_{25}\text{FN}_3$ , 362.2027; found, 362.2020.

#### 4-(1-(2-fluoro-[1,1'-biphenyl]-4-yl)ethyl)morpholine (63)

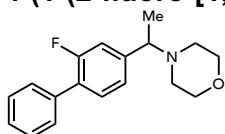

Prepared according to **General Procedure E** with morpholine (86.1  $\mu\text{L}$ , 10 equiv, 1.0 mmol) and flurbiprofen (0.025 g, 1.0 equiv, 0.10 mmol). Purification by flash chromatography on silica gel, eluting with 5-20% ethyl acetate in hexanes, afforded the product as a clear oil (25.7 mg, 90% yield).  $^1\text{H NMR}$  (500 MHz,  $\text{CDCl}_3$ )  $\delta$  7.59 – 7.52 (m, 2H), 7.47 – 7.41 (m, 2H), 7.40 – 7.32 (m, 2H), 7.18 – 7.12 (m, 2H), 3.72 (ddd,  $J = 5.9, 3.6, 2.4$  Hz, 4H), 3.35 (q,  $J = 6.7$  Hz, 1H), 2.66 – 2.48 (m, 2H), 2.49 – 2.35 (m, 2H), 1.37 (d,  $J = 6.7$  Hz, 3H).  $^{13}\text{C NMR}$  (126 MHz,  $\text{CDCl}_3$ )  $\delta$  159.93 (d,  $J = 247.8$  Hz), 146.13 (d,  $J = 7.0$  Hz), 135.89 (d,  $J = 1.3$  Hz), 130.62 (d,  $J = 3.8$  Hz), 129.09 (d,  $J = 3.0$  Hz), 128.56, 127.68 (d,  $J = 13.7$  Hz), 127.68, 123.65 (d,  $J = 3.3$  Hz), 115.14 (d,  $J = 23.2$  Hz), 67.38, 64.79, 51.35, 19.76.  $^{19}\text{F NMR}$  (377 MHz,  $\text{CDCl}_3$ )  $\delta$  -118.23 (s, 1F). **HRMS** (FTMS + p ESI)  $m/z$ :  $[\text{M}+\text{H}]^+$  calculated for  $\text{C}_{18}\text{H}_{21}\text{FNO}$ , 286.1602; found, 286.1896.

#### 1-(2-fluoro-[1,1'-biphenyl]-4-yl)-*N,N*-dimethylethan-1-amine (64)

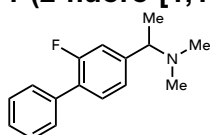

Prepared according to **General Procedure E** with dimethylamine (1.5 mL, 2.0 M in THF, 10 equiv, 3.0 mmol) and flurbiprofen (0.073 g, 1.0 equiv, 0.30 mmol). Reaction was conducted on a 0.3 mmol scale. Purification by flash chromatography on silica gel, eluting with 40-60% ethyl acetate in hexanes, afforded the product as a clear oil (77 mg, 94% yield).  $^1\text{H NMR}$  (500 MHz, Chloroform-*d*)  $\delta$  7.59 – 7.51 (m, 2H), 7.47 – 7.33 (m, 5H), 7.18 – 7.10 (m, 2H), 3.37 (q,  $J = 6.4$  Hz, 1H), 2.26 (s, 6H), 1.41 (d,  $J = 6.7$  Hz, 3H).  $^{13}\text{C NMR}$  (126 MHz, Chloroform-*d*)  $\delta$  159.84 (d,  $J = 247.9$  Hz), 145.35 (d,  $J = 7.8$  Hz), 135.85, 130.60 (d,  $J = 3.8$  Hz), 129.10 (d,  $J = 2.9$  Hz), 128.56, 127.83, 127.69, 123.70 (d,  $J = 3.2$  Hz), 115.29 (d,  $J = 23.1$  Hz), 65.29 (d,  $J = 1.5$  Hz), 43.00, 19.83.  $^{19}\text{F NMR}$  (377 MHz, Chloroform-*d*)  $\delta$  -118.24 (s, 1F). **HRMS** (FTMS + p ESI)  $m/z$ :  $[\text{M}+\text{H}]^+$  calculated for  $\text{C}_{16}\text{H}_{18}\text{FNH}$ , 244.1496; found 244.1494.

#### *N*-(1-(2-fluoro-[1,1'-biphenyl]-4-yl)ethyl)butan-1-amine (65)

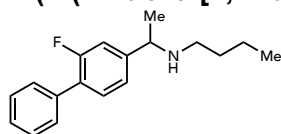

Prepared according to **General Procedure E** with butylamine (98.6  $\mu\text{L}$ , 10 equiv, 1.0 mmol) and flurbiprofen (0.025 g, 1.0 equiv, 0.10 mmol). Purification by flash chromatography on silica gel, eluting with 5-20% ethyl acetate in hexanes, afforded the product as a clear oil (21.9 mg, 81% yield).  $^1\text{H NMR}$  (500 MHz,  $\text{CDCl}_3$ )  $\delta$  7.58 – 7.53 (m, 2H), 7.51 – 7.41 (m, 2H), 7.41 – 7.32 (m, 2H), 7.20 – 7.11 (m, 2H), 3.79 (q,  $J = 6.6$  Hz, 1H), 2.53 (dt,  $J = 11.3, 7.3$  Hz, 1H), 2.47 (dt,  $J = 11.3, 7.3$  Hz, 1H), 1.51 – 1.43 (m, 2H), 1.37 (d,  $J = 6.6$  Hz, 3H), 1.36 – 1.30 (m, 2H), 0.90 (t,  $J = 7.3$  Hz,

3H). **<sup>13</sup>C NMR** (126 MHz, CDCl<sub>3</sub>) δ 160.05 (d, *J* = 247.7 Hz), 148.14 (d, *J* = 7.8 Hz), 136.02, 130.73 (d, *J* = 3.8 Hz), 129.12 (d, *J* = 2.9 Hz), 128.54, 127.61, 127.46 (d, *J* = 13.6 Hz), 122.63 (d, *J* = 3.2 Hz), 114.19 (d, *J* = 23.0 Hz), 58.01, 47.77, 32.59, 24.53, 20.64, 14.16. **<sup>19</sup>F NMR** (377 MHz, CDCl<sub>3</sub>) δ -118.33 (s, 1F). **HRMS** (FTMS + p ESI) *m/z*: [M+H]<sup>+</sup> calculated for C<sub>18</sub>H<sub>23</sub>FN, 272.1809; found, 272.1804.

### 2-methyl-1-(1-phenylethyl)-1H-imidazole (66)

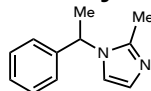

Prepared according to **General Procedure E** with 2-methylimidazole (0.082 g, 10 equiv, 1.0 mmol) and 2-phenylpropanoic acid (0.015 g, 1.0 equiv, 0.10 mmol). Purification by flash chromatography on silica gel, eluting with 5-20% ethyl acetate in hexanes, afforded the product as a white solid (10.9 mg, 59% yield). The spectral data matched those previously reported.<sup>20</sup> **<sup>1</sup>H NMR** (500 MHz, CDCl<sub>3</sub>) δ 7.36 – 7.29 (m, 2H), 7.30 – 7.23 (m, 1H), 7.05 (dd, *J* = 7.8, 1.2 Hz, 2H), 6.98 (dd, *J* = 7.6, 1.4 Hz, 2H), 5.30 (q, *J* = 7.1 Hz, 1H), 2.27 (s, 3H), 1.80 (d, *J* = 7.1 Hz, 3H). **<sup>13</sup>C NMR** (126 MHz, CDCl<sub>3</sub>) δ 144.90, 141.91, 128.98, 127.83, 127.33, 125.84, 116.54, 55.10, 22.43, 13.61. **mp**: 87.5 – 88.3 °C (lit.<sup>20</sup> 85 – 86 °C). **HRMS** (FTMS + p ESI) *m/z*: [M+H]<sup>+</sup> calculated for C<sub>12</sub>H<sub>15</sub>N<sub>2</sub>, 187.1230; found, 187.1228.

### *N*-(1-(2-fluoro-[1,1'-biphenyl]-4-yl)ethyl)-4-methylaniline (67)

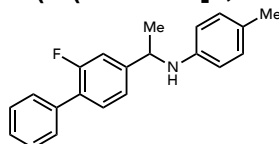

Prepared according to **General Procedure E** with *p*-toluidine (0.107 g, 10 equiv, 1.0 mmol) and flurbiprofen (0.025 g, 1.0 equiv, 0.10 mmol). Purification by flash chromatography on silica gel, eluting with 5-20% ethyl acetate in hexanes, afforded the product as a pale yellow oil (19.2 mg, 63% yield). **<sup>1</sup>H NMR** (500 MHz, CDCl<sub>3</sub>) δ 7.60 – 7.50 (m, 2H), 7.47 – 7.41 (m, 2H), 7.40 – 7.31 (m, 2H), 7.22 (dd, *J* = 7.9, 1.8 Hz, 1H), 7.18 (dd, *J* = 11.7, 1.7 Hz, 1H), 6.94 (d, *J* = 8.4 Hz, 2H), 6.47 (d, *J* = 8.4 Hz, 2H), 4.48 (q, *J* = 6.7 Hz, 1H), 3.93 (br s, 1H), 2.21 (s, 3H), 1.54 (d, *J* = 6.7 Hz, 3H). **<sup>13</sup>C NMR** (126 MHz, CDCl<sub>3</sub>) δ 160.17 (d, *J* = 248.1 Hz), 147.62 (d, *J* = 6.6 Hz), 144.86, 135.92 (d, *J* = 1.3 Hz), 131.05 (d, *J* = 3.8 Hz), 129.82, 129.10 (d, *J* = 2.9 Hz), 128.53, 127.63, 127.53 (d, *J* = 13.7 Hz), 126.89, 121.90 (d, *J* = 3.2 Hz), 113.60 (d, *J* = 23.5 Hz), 113.58, 53.36, 25.14, 20.49. **<sup>19</sup>F NMR** (377 MHz, CDCl<sub>3</sub>) δ -117.79 (s, 1F). **HRMS** (FTMS + p ESI) *m/z*: [M+H]<sup>+</sup> calculated for C<sub>21</sub>H<sub>21</sub>FN, 306.1652; found, 306.1646.

### 2-fluoro-4-(1-tosylethyl)-1,1'-biphenyl (68)

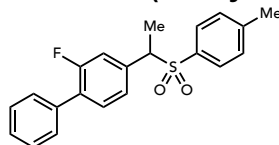

An oven-dried 4-mL vial equipped with a stir bar is brought into a nitrogen-filled glovebox and charged with FeCl<sub>3</sub> (0.049 g, 3.0 equiv, 0.30 mmol), Na<sub>3</sub>PO<sub>4</sub> (0.049 g, 3.0 equiv, 0.30 mmol), flurbiprofen (0.024 g, 1.0 equiv, 0.10 mmol), and MeCN (1.0 mL, 0.10 M). The vial is sealed with a screwcap bearing a teflon septum, removed from the glovebox, and placed into a EvoluChem™ PhotoRedOx Box. Stirring at 800 rpm is engaged and the vial is irradiated at 427 nm with a 40 W Kessil™ lamp. After 24 h, the light is turned off, the vial is removed from the PhotoRedox Box, and diluted with 1.5 mL diethyl ether and 1.5 mL saturated aqueous NH<sub>4</sub>Cl. The biphasic mixture is thoroughly shaken, and the organic layer is removed and filtered through a short pad of

diatomaceous earth to remove trace water. The remaining aqueous layer is washed 1x1.5 mL with diethyl ether, and the organic wash is pushed through the same filter pad. The solvent is removed from the combined organic layers to afford the crude benzylic chloride intermediate. To this vial is added DMF (0.50 mL, 0.20 M) and sodium *p*-toluenesulfinate (0.089 g, 5.0 equiv, 0.50 mmol). The vial is sealed with a screwcap bearing a teflon septum and stirred at 80 °C for 16 h. The reaction was quenched by the addition of 1.5 mL 0.5 M aqueous LiCl and is washed 3x1.5 mL ethyl acetate. The organic extracts are combined, and the solvent is removed under reduced pressure. Purification by flash chromatography on silica gel, eluting with 5-20% ethyl acetate in hexanes, afforded the product as a white solid (25.9 mg, 73% yield). The spectral data matched those previously reported.<sup>21</sup> **<sup>1</sup>H NMR** (500 MHz, CDCl<sub>3</sub>) δ 7.53 – 7.43 (m, 4H), 7.41 – 7.36 (m, 2H), 7.35 – 7.24 (m, 2H), 7.22 – 7.16 (m, 2H), 6.96 (dd, *J* = 7.9, 1.9 Hz, 1H), 6.93 (dd, *J* = 11.4, 1.8 Hz, 1H), 4.17 (q, *J* = 7.2 Hz, 1H), 2.35 (s, 3H), 1.69 (d, *J* = 7.2 Hz, 3H). **<sup>13</sup>C NMR** (126 MHz, CDCl<sub>3</sub>) δ 159.48 (d, *J* = 249.0 Hz), 144.97, 135.26 (d, *J* = 6.3 Hz), 135.22, 133.95, 130.64 (d, *J* = 3.9 Hz), 129.61, 129.49, 129.39, 129.09 (d, *J* = 3.0 Hz), 128.66, 128.12, 125.67 (d, *J* = 3.5 Hz), 117.22 (d, *J* = 24.3 Hz), 65.52, 21.78, 14.45. **<sup>19</sup>F NMR** (377 MHz, CDCl<sub>3</sub>) δ -117.32 (s, 1F). **mp**: 137.2 – 138.5 °C. **HRMS** (FTMS + *p* ESI) *m/z*: [M+NH<sub>4</sub>]<sup>+</sup> calculated for [C<sub>21</sub>H<sub>19</sub>FO<sub>2</sub>S][NH<sub>4</sub>]<sup>+</sup>, 372.1428; found, 372.1422.

### 2-(1-(2-fluoro-[1,1'-biphenyl]-4-yl)ethyl)-4,4,5,5-tetramethyl-1,3,2-dioxaborolane (69)

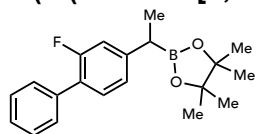

An oven-dried 6-mL vial equipped with a stir bar is brought into a nitrogen-filled glovebox and charged with FeCl<sub>3</sub> (0.097 g, 3.0 equiv, 0.60 mmol), Na<sub>3</sub>PO<sub>4</sub> (0.098 g, 3.0 equiv, 0.60 mmol), flurbiprofen (0.049 g, 1.0 equiv, 0.20 mmol), and MeCN (2.0 mL, 0.10 M). The vial is sealed with a screwcap bearing a teflon septum, removed from the glovebox, and placed into a EvoluChem™ PhotoRedOx Box. Stirring at 800 rpm is engaged and the vial is irradiated at 427 nm with a 40 W Kessil™ lamp. After 24 h, the light is turned off, the vial is removed from the PhotoRedox Box, and diluted with 1.5 mL diethyl ether and 1.5 mL saturated aqueous NH<sub>4</sub>Cl. The biphasic mixture is thoroughly shaken, and the organic layer is removed and filtered through a short pad of diatomaceous earth to remove trace water. The remaining aqueous layer is washed 1x1.5 mL with diethyl ether, and the organic wash is pushed through the same filter pad. The solvent is removed from the combined organic layers to afford the crude benzylic chloride intermediate.

A separate oven-dried 4-mL vial equipped with a stir bar is brought into a nitrogen-filled glovebox and charged with CuCl (0.002 g, 10 mol%), Xantphos (0.012 g, 10 mol%), and anhydrous THF (0.40 mL). The mixture is swirled gently to promote solvation. Once the majority of the CuCl is dissolved, the vial is next charged with bis(pinacolato)diboron (0.061 g, 1.2 equiv, 0.24 mmol) and KO<sup>*t*</sup>-Bu (0.027 g, 1.2 equiv, 0.24 mmol) and swirled gently for ca. 5 min. The crude benzylic chloride from the first step is next added as a solution in 1.0 mL anhydrous THF (total reaction concentration 0.40 M). The vial is sealed with a screwcap bearing a teflon septum, removed from the glovebox, and stirred at room temperature for 24 h. The reaction is quenched by addition of 1 mL saturated aqueous NH<sub>4</sub>Cl, and the mixture is washed 3x1 mL Et<sub>2</sub>O. The combined organic extracts are dried with MgSO<sub>4</sub>, filtered, and the solvent is removed under reduced pressure. Purification by flash chromatography on silica, eluting with 5% ethyl acetate in hexanes, afforded the product as a clear oil (33.3 mg, 51% yield). The spectral data matched with those previously reported.<sup>22</sup> **<sup>1</sup>H NMR** (500 MHz, CDCl<sub>3</sub>) δ 7.58 – 7.52 (m, 2H), 7.45 – 7.39 (m, 2H), 7.36 – 7.30 (m, 2H), 7.06 (dd, *J* = 7.9, 1.8 Hz, 1H), 7.03 (dd, *J* = 12.1, 1.8 Hz, 1H), 2.48 (q, *J* = 7.5 Hz, 1H), 1.36 (d, *J* = 7.5 Hz, 3H), 1.24 (s, 6H), 1.23 (s, 6H). **<sup>13</sup>C NMR** (126 MHz, CDCl<sub>3</sub>) δ 159.89 (d, *J* = 247.1 Hz), 146.96 (d, *J* = 7.7 Hz), 136.24 (d, *J* = 1.3 Hz), 130.50 (d, *J* = 4.0 Hz), 129.08 (d, *J* = 3.0 Hz),



128.49, 127.39, 125.74 (d,  $J = 13.6$  Hz), 123.97 (d,  $J = 3.1$  Hz), 115.37 (d,  $J = 22.8$  Hz), 83.67, 24.97, 24.80, 24.76, 16.96.  **$^{19}\text{F}$  NMR** (377 MHz,  $\text{CDCl}_3$ )  $\delta$  -118.8. (s, 1F).  **$^{11}\text{B}$  NMR** (128 MHz,  $\text{CDCl}_3$ )  $\delta$  33.43 (s). **HRMS** (FTMS + p ESI)  $m/z$ :  $[\text{M}+\text{H}]^+$  calculated for  $\text{C}_{20}\text{H}_{25}\text{BFO}_2$ , 327.1926; found, 327.1922.

## Extra Substrates

### 3-(1-phenylethyl)-1-tosyl-1H-indole (S3)

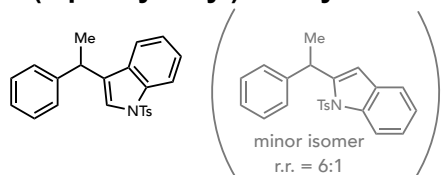

Prepared according to **General Procedure A** with 1-tosylindole (0.163 g, 3.0 equiv, 0.6 mmol) and 2-phenylpropanoic acid (0.030 g, 1.0 equiv, 0.20 mmol).  $\text{Fe}(\text{OTf})_3$  (0.302 g, 3.0 equiv, 0.60 mmol) and  $\text{Na}_2\text{CO}_3$  (0.064 g, 3.0 equiv, 0.60 mmol) were used in place of  $\text{FeCl}_3$  and  $\text{NaOAc}$ , respectively. Purification by flash chromatography on silica gel, eluting with 0–2.5% ether in pentane, enabled the separation of the two isomers, each isolated as a white solid (55.6 mg combined mass, 74% yield, 6:1 *r.r.*). Major isomer:  **$^1\text{H}$  NMR** (500 MHz,  $\text{CDCl}_3$ )  $\delta$  7.95 (d,  $J = 8.3$  Hz, 1H), 7.75 (d,  $J = 8.4$  Hz, 2H), 7.42 (d,  $J = 1.0$  Hz, 1H), 7.29 – 7.20 (m, 5H), 7.20 – 7.14 (m, 4H), 7.07 (ddd,  $J = 8.0, 7.1, 1.0$  Hz, 1H), 4.22 (q,  $J = 7.7, 7.1$  Hz, 1H), 2.35 (s, 3H), 1.66 (d,  $J = 7.1$  Hz, 3H).  **$^{13}\text{C}$  NMR** (126 MHz,  $\text{CDCl}_3$ )  $\delta$  145.07, 144.88, 135.85, 135.46, 130.60, 129.94, 128.66, 127.86, 127.42, 126.91, 126.54, 124.72, 123.14, 123.04, 120.48, 113.90, 37.01, 22.16, 21.71. **mp**: 121.0 – 122.6 °C. **HRMS** (FTMS + p ESI)  $m/z$ :  $[\text{M}+\text{Na}]^+$  calculated for  $\text{C}_{23}\text{H}_{21}\text{NO}_2\text{SNa}$ , 398.1185; found, 398.1183. Minor isomer:  **$^1\text{H}$  NMR** (500 MHz,  $\text{CDCl}_3$ )  $\delta$  8.11 (dd,  $J = 8.3, 1.0$  Hz, 1H), 7.45 (dd,  $J = 8.1, 1.3$  Hz, 1H), 7.28 (t,  $J = 8.3$  Hz, 3H), 7.25 – 7.15 (m, 6H), 7.01 (d,  $J = 8.3$  Hz, 2H), 6.54 (d,  $J = 1.0$  Hz, 1H), 5.00 (q,  $J = 7.1$  Hz, 1H), 2.28 (s, 3H), 1.66 (d,  $J = 7.1$  Hz, 3H).  **$^{13}\text{C}$  NMR** (126 MHz,  $\text{CDCl}_3$ )  $\delta$  146.20, 144.80, 144.44, 137.46, 136.15, 129.66, 129.62, 128.55, 127.92, 126.54, 126.48, 124.26, 123.62, 120.53, 115.27, 109.62, 38.45, 23.87, 21.60.

### (5-bromo-3-(1-phenylethyl)-1H-indol-1-yl)(phenyl)methanone (S4)

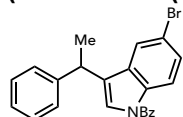

Prepared according to **General Procedure A** with 1-benzoyl-5-bromoindole (0.090 g, 3.0 equiv, 0.3 mmol) and 2-phenylpropanoic acid (0.015 g, 1.0 equiv, 0.10 mmol).  $\text{Fe}(\text{OTf})_3$  (0.150 g, 3.0 equiv, 0.30 mmol) and  $\text{Na}_2\text{CO}_3$  (0.032 g, 3.0 equiv, 0.30 mmol) were used in place of  $\text{FeCl}_3$  and  $\text{NaOAc}$ , respectively. Purification by flash chromatography on silica gel, eluting with 0–2.5% ether in pentane, afforded the product as a clear oil (26.3 mg, 65% yield).  **$^1\text{H}$  NMR** (500 MHz,  $\text{CDCl}_3$ )  $\delta$  8.20 (d,  $J = 8.3$  Hz, 1H), 7.81 – 7.71 (m, 2H), 7.68 – 7.59 (m, 1H), 7.62 – 7.51 (m, 2H), 7.45 – 7.38 (m, 2H), 7.35 – 7.24 (m, 2H), 7.24 – 7.11 (m, 4H), 4.22 (q,  $J = 7.1$  Hz, 1H), 1.61 (d,  $J = 7.1$  Hz, 3H).  **$^{13}\text{C}$  NMR** (126 MHz,  $\text{CDCl}_3$ )  $\delta$  168.45, 144.67, 135.61, 134.51, 132.32, 132.24, 129.31, 128.85, 128.82, 127.98, 127.35, 126.77, 126.26, 125.09, 122.78, 117.98, 117.11, 36.79, 22.09. **HRMS** (FTMS + p ESI)  $m/z$ :  $[\text{M}+\text{H}]^+$  calculated for  $\text{C}_{23}\text{H}_{19}\text{BrNO}$ , 404.0645; found, 404.0643.

### 2-(1-(4-fluorophenyl)ethyl)thiophene (S5)

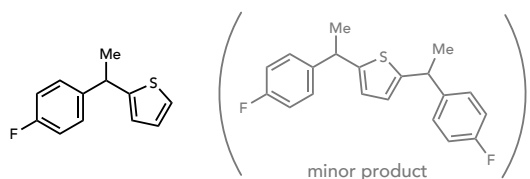

Prepared according to **General Procedure A** with thiophene (0.120 mL, 5.0 equiv, 1.5 mmol) and 2-(4-fluorophenyl)propanoic acid (0.050 g, 1.0 equiv, 0.3 mmol). The crude reaction mixture was purified by reverse phase flash chromatography over C18 functionalized silica with H<sub>2</sub>O/MeOH. The product eluted around ~80% MeOH. Product-containing fractions were combined, diluted with EtOAc, and washed with brine (1x). The aqueous layer was washed with EtOAc (3x). The combined organic layers were dried over MgSO<sub>4</sub>, filtered through a plug of celite, and concentrated under reduced pressure to afford the product as a clear oil (20 mg, 33% yield, 10:1). *Where resolved, signals for the minor product are given in brackets.* **<sup>1</sup>H NMR** (500 MHz, Chloroform-*d*) δ 7.25 – 7.18 (m, 2.14H), 7.17 – 7.12 (m, 1H), 7.02 – 6.94 (m, 2.59H), 6.92 (dd, *J* = 5.2, 3.5 Hz, 1H), [6.85 (dd, *J* = 4.9, 1.3 Hz, 0.17H)], 6.81 – 6.76 (m, 1H), 4.33 (q, *J* = 7.1 Hz, 1H), [4.14 (q, *J* = 7.2 Hz, 0.19H)], 1.68 (d, *J* = 7.2 Hz, 3H), [1.61 (d, *J* = 7.2 Hz, 0.55H)]. **<sup>13</sup>C NMR** (126 MHz, CDCl<sub>3</sub>) δ 162.64, [162.47], 160.70, [160.53], 150.65, [147.19], [142.10 (d, *J* = 3.0 Hz)], 141.92 (d, *J* = 3.1 Hz), [128.93 (d, *J* = 7.9 Hz)], 128.84 (d, *J* = 7.9 Hz), 127.84, 126.71, 125.70, 123.78, 123.76, 120.04, 115.45, [115.37], 115.29, [115.20], [40.20], 40.15, 23.60. **<sup>19</sup>F NMR** (377 MHz, CDCl<sub>3</sub>) δ -116.74, [-117.29]. **HRSM** (FTMS + *p* ESI) *m/z*: [M + H]<sup>+</sup> calculated for C<sub>12</sub>H<sub>11</sub>FSH, 207.0638; found, 207.0637.

### 1-ferrocenyl-1-phenylethane (S6)

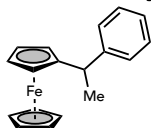

Prepared according to **General Procedure A** with ferrocene (0.059 g, 3.0 equiv, 0.3 mmol) and 2-phenylpropanoic acid (0.015 g, 1.0 equiv, 0.10 mmol). Purification by flash chromatography on silica gel, eluting with 0–5% ethyl acetate in hexanes, afforded the product as an orange oil (16.7 mg, 56% yield). The spectral data matched those previously reported.<sup>23</sup> **<sup>1</sup>H NMR** (500 MHz, CDCl<sub>3</sub>) δ 7.30 – 7.22 (m, 2H), 7.19 – 7.11 (m, 3H), 4.20 (dt, *J* = 2.6, 1.3 Hz, 1H), 4.12 – 4.11 (m, 6H), 4.08 (td, *J* = 2.4, 1.3 Hz, 1H), 3.99 (dt, *J* = 2.5, 1.4 Hz, 1H), 3.86 (q, *J* = 7.2 Hz, 1H), 1.59 (d, *J* = 7.2 Hz, 3H). **<sup>13</sup>C NMR** (126 MHz, CDCl<sub>3</sub>) δ 147.69, 128.34, 127.24, 126.06, 94.47, 68.70, 68.04, 67.69, 67.06, 66.51, 39.95, 22.72. **HRMS** (FTMS + *p* ESI) *m/z*: [M+H]<sup>+</sup> calculated for C<sub>18</sub>H<sub>29</sub>Fe, 289.0877; found, 289.0874.

### 1-isobutyl-4-(1-phenethoxyethyl)benzene (S7)

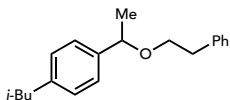

Prepared according to **General Procedure B** with 2-phenylethan-1-ol (0.108 mL, 3.0 equiv, 0.9 mmol) and 2-(4-isobutylphenyl)propanoic acid (0.062 g, 1.0 equiv, 0.3 mmol). Purification by flash chromatography on silica gel, eluting with 2% ether in hexanes, afforded the product as a clear oil (57 mg, 67% yield). **<sup>1</sup>H NMR** (500 MHz, CDCl<sub>3</sub>) δ 7.26 – 7.23 (m, 2H), 7.20 – 7.12 (m, 5H), 7.08 – 7.07 (m, 2H), 4.38 (q, *J* = 6.4 Hz, 1H), 3.50 (td, *J* = 7.3, 2.9 Hz, 2H), 2.93 – 2.78 (m, 2H), 2.45 (d, *J* = 7.2 Hz, 2H), 1.85 (dp, *J* = 13.4, 6.7 Hz, 1H), 1.42 (d, *J* = 6.5 Hz, 3H), 0.90 (d, *J* = 6.6 Hz, 6H). **<sup>13</sup>C NMR** (126 MHz, CDCl<sub>3</sub>) δ 141.24, 140.90, 139.25, 129.21, 129.08, 128.36, 126.20, 126.06, 78.07, 69.63, 45.28, 36.72, 30.35, 24.14, 22.55. **HRSM** (FTMS + *p* ESI) *m/z*: [M + Na]<sup>+</sup> calculated for C<sub>20</sub>H<sub>26</sub>ONa, 305.1876; found, 305.1871.

### 1-methoxy-4-(2-(1-phenylethoxy)ethyl)benzene (S8)

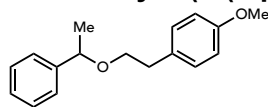

Prepared according to **General Procedure B** with 2-(4-methoxyphenyl)ethan-1-ol (0.137 g, 3.0 equiv, 0.9 mmol) and 2-phenylpropanoic acid (0.045 g, 1.0 equiv, 0.3 mmol). Purification by flash chromatography on silica gel, eluting with 2% ether in hexanes, afforded the product as a clear oil (38 mg, 45% yield). **<sup>1</sup>H NMR** (500 MHz, CDCl<sub>3</sub>) δ 7.34 – 7.28 (m, 2H), 7.27 – 7.23 (m, 3H), 7.09 (d, *J* = 8.5 Hz, 2H), 6.80 (d, *J* = 8.6 Hz, 2H), 4.39 (q, *J* = 6.5 Hz, 1H), 3.77 (s, 3H), 3.50 – 3.44 (m, 2H), 2.87 – 2.75 (m, 2H), 1.42 (d, *J* = 6.5 Hz, 3H). **<sup>13</sup>C NMR** (126 MHz, CDCl<sub>3</sub>) δ 158.16, 144.14, 131.27, 129.99, 128.51, 127.46, 126.27, 113.83, 78.22, 70.00, 55.39, 35.79, 24.26. **HRSM** (FTMS + p ESI) *m/z*: [M + Na]<sup>+</sup> calculated for C<sub>17</sub>H<sub>20</sub>O<sub>2</sub>Na, 279.1355; found, 279.1351.

### 1-(1-ethoxyethyl)-4-isobutylbenzene (S9)

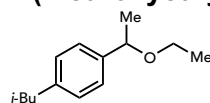

Prepared according to **General Procedure B** with ethanol (0.053 mL, 3.0 equiv, 0.9 mmol) and 2-(4-isobutylphenyl)propanoic acid (0.062 g, 1.0 equiv, 0.3 mmol). Purification by flash chromatography on silica gel, eluting with 2% ethyl acetate in hexanes, afforded the product as a clear oil (27 mg, 44% yield). **<sup>1</sup>H NMR** (500 MHz, CDCl<sub>3</sub>) δ 7.21 (d, *J* = 8.0 Hz, 2H), 7.11 (d, *J* = 8.1 Hz, 2H), 4.38 (q, *J* = 6.5 Hz, 1H), 3.38 – 3.30 (m, 2H), 2.46 (d, *J* = 7.2 Hz, 2H), 1.91 – 1.80 (m, 1H), 1.43 (d, *J* = 6.5 Hz, 3H), 1.18 (t, *J* = 7.0 Hz, 3H), 0.90 (d, *J* = 6.6 Hz, 6H). **<sup>13</sup>C NMR** (126 MHz, CDCl<sub>3</sub>) δ 141.55, 140.88, 129.23, 126.03, 77.72, 63.93, 45.30, 30.37, 24.30, 22.56, 15.57. **HRSM** (FTMS + p ESI) *m/z*: [M – H]<sup>+</sup> calculated for C<sub>14</sub>H<sub>21</sub>O, 205.1587; found, 205.1586.

### 2-(4-(1-(3,3-dimethylbutoxy)ethyl)benzyl)cyclopentan-1-one (S10)

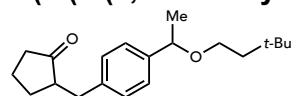

Prepared according to **General Procedure B** with 3,3-dimethylbutan-1-ol (0.109 mL, 3.0 equiv, 0.9 mmol) and 2-(4-((2-oxocyclopentyl)methyl)phenyl)propanoic acid (0.074 g, 1.0 equiv, 0.3 mmol). Purification by flash chromatography on silica gel, eluting with 10% ethyl acetate in hexanes, afforded the product as a clear oil (71 mg, 77% yield, 1:1 d.r.). **<sup>1</sup>H NMR** (500 MHz, CDCl<sub>3</sub>) δ 7.22 (d, *J* = 8.1 Hz, 2H), 7.13 (d, *J* = 8.0 Hz, 2H), 4.35 (q, *J* = 6.5 Hz, 1H), 3.39 – 3.28 (m, 2H), 3.14 (dd, *J* = 13.9, 4.1 Hz, 1H), 2.53 (dd, *J* = 13.9, 9.5 Hz, 1H), 2.41 – 2.28 (m, 2H), 2.15 – 2.04 (m, 2H), 2.01 – 1.89 (m, 1H), 1.78 – 1.69 (m, 1H), 1.62 – 1.45 (m, 3H), 1.41 (d, *J* = 6.5 Hz, 3H), 0.86 (s, 9H). **<sup>13</sup>C NMR** (126 MHz, CDCl<sub>3</sub>) δ 220.40, 142.29, 142.27, 139.08, 129.01, 126.35, 77.85, 77.84, 66.03, 51.15, 43.39, 38.36, 35.45, 29.86, 29.78, 29.38, 29.36, 24.26, 24.24, 20.70 (mixture of diastereomers). **HRSM** (FTMS + p ESI) *m/z*: [M – C<sub>6</sub>H<sub>13</sub>O + H]<sup>+</sup> calculated for C<sub>14</sub>H<sub>17</sub>OH, 201.1274; found, 201.1273.

### 1-(1-(cyclohexyloxy)ethyl)-4-methylbenzene (S11)

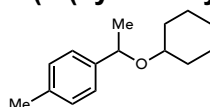

Prepared according to **General Procedure B** with cyclohexanol (0.095 mL, 3.0 equiv, 0.9 mmol) and 2-(*p*-tolyl)propanoic acid (0.049 g, 1.0 equiv, 0.3 mmol). Purification by flash chromatography on silica gel, eluting with 5% ether in hexanes, afforded the product as a clear oil (67 mg, 76%

yield). **<sup>1</sup>H NMR** (500 MHz, CDCl<sub>3</sub>) δ 7.22 (d, *J* = 8.0 Hz, 2H), 7.14 (d, *J* = 7.9 Hz, 2H), 4.56 (q, *J* = 6.5 Hz, 1H), 3.15 (tt, *J* = 9.7, 3.9 Hz, 1H), 2.34 (s, 3H), 2.00 – 1.91 (m, 1H), 1.80 – 1.63 (m, 3H), 1.53 – 1.45 (m, 1H), 1.39 (d, *J* = 6.5 Hz, 3H), 1.32 – 1.22 (m, 3H), 1.20 – 1.10 (m, 2H). **<sup>13</sup>C NMR** (126 MHz, CDCl<sub>3</sub>) δ 142.22, 136.80, 129.11, 126.18, 74.80, 74.14, 33.66, 31.94, 25.99, 25.08, 24.60, 24.37, 21.27. **HRSM** (FTMS + p ESI) *m/z*: [M + H]<sup>+</sup> calculated for C<sub>15</sub>H<sub>22</sub>O, 219.1743; found, 219.1742.

### 1-(1-phenylethoxy)adamantane (S12)

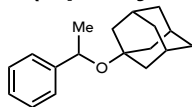

Prepared according to **General Procedure B** with (3*s*,5*s*,7*s*)-adamantan-1-ol (0.137 g, 3.0 equiv, 0.9 mmol) and 2-phenylpropanoic acid (0.041 mL, 1.0 equiv, 0.3 mmol). The crude reaction mixture was purified by reverse phase flash chromatography over C18 functionalized silica with H<sub>2</sub>O/MeCN. The product eluted around ~50% MeCN. Product-containing fractions were combined, diluted with EtOAc, and washed with brine (1x). The aqueous layer was washed with EtOAc (3x). The combined organic layers were dried over MgSO<sub>4</sub>, filtered through a plug of celite, and concentrated under reduced pressure to afford the product as a clear oil (12 mg, 16% yield). The spectral data matched those previously reported.<sup>24</sup> **<sup>1</sup>H NMR** (500 MHz, Chloroform-*d*) δ 7.36 (d, *J* = 7.2 Hz, 2H), 7.29 (t, *J* = 7.6 Hz, 2H), 7.23 – 7.17 (m, 1H), 4.82 (q, *J* = 6.5 Hz, 1H), 2.11 – 2.05 (m, 3H), 1.78 – 1.65 (m, 6H), 1.66 – 1.50 (m, 6H), 1.36 (d, *J* = 6.6 Hz, 3H). **<sup>13</sup>C NMR** (126 MHz, CDCl<sub>3</sub>) δ 147.89, 128.18, 126.57, 125.74, 73.58, 67.95, 42.75, 36.57, 30.74, 26.91.

### 2-methyl-*N*-(4-methylbenzyl)benzenesulfonamide (S13)

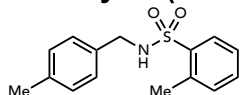

Prepared according to **General Procedure D** with *o*-toluenesulfonamide (0.051 g, 3.0 equiv, 0.60 mmol) and 2-(*p*-tolyl)acetic acid (0.030 g, 1.0 equiv, 0.20 mmol). Fe(OTf)<sub>3</sub> (0.302 g, 3.0 equiv, 0.60 mmol) was used in place of FeCl<sub>3</sub>. Purification by flash chromatography on silica gel, eluting with 30–60% ethyl acetate in hexanes, afforded the product as a clear oil (21.0 mg, 38% yield). **<sup>1</sup>H NMR** (500 MHz, CDCl<sub>3</sub>) δ 8.00 (dd, *J* = 7.9, 1.4 Hz, 1H), 7.47 (td, *J* = 7.4, 1.4 Hz, 1H), 7.32 (dd, *J* = 9.0, 7.4 Hz, 2H), 7.08 (d, *J* = 8.2 Hz, 2H), 7.04 (d, *J* = 8.2 Hz, 2H), 4.62 (t, *J* = 6.1 Hz, 1H), 4.07 (d, *J* = 6.0 Hz, 2H), 2.62 (s, 3H), 2.31 (s, 3H). **<sup>13</sup>C NMR** (126 MHz, CDCl<sub>3</sub>) δ 137.95, 137.90, 137.20, 133.36, 132.96, 132.69, 129.85, 129.55, 128.04, 126.34, 47.10, 21.22, 20.44. **HRMS** (FTMS + p ESI) *m/z*: [M-H]<sup>-</sup> calculated for C<sub>15</sub>H<sub>16</sub>NO<sub>2</sub>S, 274.0907; found, 274.0909.

### 4-methyl-*N*-(1-(*p*-tolyl)ethyl)benzenesulfonamide (S14)

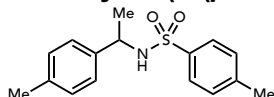

Prepared according to **General Procedure D** with *p*-toluenesulfonamide (0.051 g, 3.0 equiv, 0.60 mmol) and 2-(*p*-tolyl)propanoic acid (0.033 g, 1.0 equiv, 0.20 mmol). Purification by flash chromatography on silica gel, eluting with 20–30% ethyl acetate in hexanes, afforded the product as a white solid (32.4 mg, 56% yield). The spectral data matched those previously reported.<sup>25</sup> **<sup>1</sup>H NMR** (500 MHz, CDCl<sub>3</sub>) δ 7.63 (d, *J* = 8.2 Hz, 2H), 7.19 (d, *J* = 8.2 Hz, 2H), 7.10 – 6.95 (m, 4H), 4.80 (d, *J* = 6.8 Hz, 1H), 4.41 (p, *J* = 6.8 Hz, 1H), 2.39 (s, 3H), 2.28 (s, 3H), 1.41 (d, *J* = 6.8 Hz, 3H). **<sup>13</sup>C NMR** (126 MHz, CDCl<sub>3</sub>) δ 143.21, 139.22, 137.86, 137.37, 129.55, 129.32, 127.27, 126.18, 53.52, 23.59, 21.61, 21.13. **mp**: 113.9 – 115.0 °C (lit.<sup>26</sup> 114 – 115 °C). **HRMS** (FTMS + p ESI) *m/z*: [M-H]<sup>-</sup> calculated for C<sub>16</sub>H<sub>18</sub>NO<sub>2</sub>S, 288.1064; found, 288.1064.

#### 4-chloro-*N*-(1-(*p*-tolyl)ethyl)benzenesulfonamide (S15)

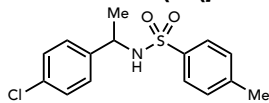

Prepared according to **General Procedure D** with *p*-toluenesulfonamide (0.051 g, 3.0 equiv, 0.60 mmol) and 2-(4-chlorophenyl)propanoic acid (0.037 g, 1.0 equiv, 0.20 mmol). Purification by flash chromatography on silica gel, eluting with 30% ethyl acetate in hexanes, afforded the product as a white solid (45.7 mg, 74% yield). The spectral data matched those previously reported.<sup>27</sup> **<sup>1</sup>H NMR** (500 MHz, CDCl<sub>3</sub>) δ 7.58 (d, *J* = 8.2 Hz, 2H), 7.18 (d, *J* = 8.2 Hz, 2H), 7.14 (d, *J* = 8.5 Hz, 1H), 7.03 (d, *J* = 8.5 Hz, 2H), 4.98 (d, *J* = 6.9 Hz, 1H), 4.44 (p, *J* = 6.9 Hz, 1H), 2.40 (s, 3H), 1.38 (d, *J* = 6.9 Hz, 3H). **<sup>13</sup>C NMR** (126 MHz, CDCl<sub>3</sub>) δ 143.51, 140.65, 137.62, 133.37, 129.61, 128.73, 127.73, 127.22, 53.15, 23.60, 21.61. **mp**: 128.0 – 129.7 °C (lit.<sup>28</sup> 129 – 130 °C). **HRMS** (FTMS + p ESI) *m/z*: [M-H]<sup>-</sup> calculated for C<sub>15</sub>H<sub>15</sub>ClNO<sub>2</sub>S, 308.0518; found, 308.0518.

#### 4-methyl-*N*-(1-phenylpropyl)benzenesulfonamide (S16)

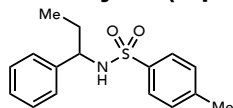

Prepared according to **General Procedure D** with *p*-toluenesulfonamide (0.051 g, 3.0 equiv, 0.60 mmol) and 2-phenylbutanoic acid (0.033 g, 1.0 equiv, 0.20 mmol). Purification by flash chromatography on silica gel, eluting with 30% ethyl acetate in hexanes, afforded the product as a white solid (45.0 mg, 78% yield). The spectral data matched those previously reported.<sup>25</sup> **<sup>1</sup>H NMR** (500 MHz, CDCl<sub>3</sub>) δ 7.54 (d, *J* = 8.3 Hz, 2H), 7.21 – 7.14 (m, 3H), 7.11 (d, *J* = 8.3 Hz, 2H), 7.06 – 6.98 (m, 2H), 5.00 (d, *J* = 7.3 Hz, 1H), 4.19 (q, *J* = 7.3 Hz, 1H), 2.35 (s, 3H), 1.81 (dp, *J* = 13.9, 7.3 Hz, 1H), 1.71 (dp, *J* = 13.9, 7.3 Hz, 1H), 0.78 (t, *J* = 7.3 Hz, 3H). **<sup>13</sup>C NMR** (126 MHz, CDCl<sub>3</sub>) δ 143.02, 140.81, 137.84, 129.37, 128.48, 127.40, 127.15, 126.67, 59.93, 30.70, 21.54, 10.54. **mp**: 107.2 – 108.2 °C (lit.<sup>29</sup> 107 – 108 °C). **HRMS** (FTMS + p ESI) *m/z*: [M-H]<sup>-</sup> calculated for C<sub>16</sub>H<sub>18</sub>NO<sub>2</sub>S, 288.1064; found, 288.1064.

#### 4-(1,1-dioxido-1,2-thiazinan-2-yl)-*N*-(1-(4-isobutylphenyl)ethyl)benzenesulfonamide (S17)

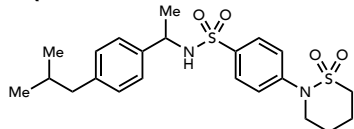

Prepared according to **General Procedure D** with sultiame (0.087 g, 3.0 equiv, 0.60 mmol) and ibuprofen (0.041 g, 1.0 equiv, 0.20 mmol). Fe(OTf)<sub>3</sub> (0.302 g, 3.0 equiv, 0.60 mmol) was used in place of FeCl<sub>3</sub>. Purification by flash chromatography on silica gel, eluting with 70% ethyl acetate in hexanes, afforded the product as a white solid (58.6 mg, 65% yield). **<sup>1</sup>H NMR** (500 MHz, CDCl<sub>3</sub>) δ 7.70 (d, *J* = 8.7 Hz, 2H), 7.32 (d, *J* = 8.7 Hz, 2H), 7.07 – 6.95 (m, 4H), 4.73 (d, *J* = 6.8 Hz, 1H), 4.48 (p, *J* = 6.8 Hz, 1H), 3.88 – 3.69 (m, 2H), 3.44 – 3.14 (m, 2H), 2.40 (d, *J* = 7.2 Hz, 2H), 2.39 – 2.31 (m, 2H), 2.10 – 1.87 (m, 2H), 1.87 – 1.75 (m, 1H), 1.44 (d, *J* = 6.8 Hz, 3H), 0.88 (s, 3H), 0.87 (s, 3H). **<sup>13</sup>C NMR** (126 MHz, CDCl<sub>3</sub>) δ 144.30, 141.41, 139.12, 138.95, 129.49, 128.12, 126.33, 126.01, 53.73, 53.21, 51.00, 45.08, 30.26, 24.53, 24.29, 23.68, 22.51, 22.49. **mp**: 121.0 – 123.3 °C. **HRMS** (FTMS + p ESI) *m/z*: [M-H]<sup>-</sup> calculated for C<sub>22</sub>H<sub>29</sub>N<sub>2</sub>O<sub>4</sub>S<sub>2</sub>, 449.1574; found, 449.1576.

#### 4-(1-phenylethyl)morpholine (S18)

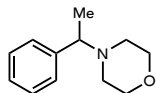

Prepared according to **General Procedure E** with morpholine (86.1  $\mu\text{L}$ , 10 equiv, 1.0 mmol) and 2-phenylpropanoic acid (0.015 g, 1.0 equiv, 0.10 mmol). Purification by flash chromatography on silica gel, eluting with 5-20% ethyl acetate in hexanes, afforded the product as a clear oil (12.1 mg, 63% yield). The spectral data matched those previously reported.<sup>30</sup>  **$^1\text{H}$  NMR** (500 MHz,  $\text{CDCl}_3$ )  $\delta$  7.34 – 7.29 (m, 4H), 7.28 – 7.20 (m, 1H), 3.69 (ddd,  $J$  = 5.5, 3.7, 1.4 Hz, 4H), 3.30 (q,  $J$  = 6.7 Hz, 1H), 2.61 – 2.42 (m, 2H), 2.40 – 2.32 (m, 2H), 1.35 (d,  $J$  = 6.7 Hz, 3H).  **$^{13}\text{C}$  NMR** (126 MHz,  $\text{CDCl}_3$ )  $\delta$  144.11, 128.43, 127.77, 127.11, 67.39, 65.54, 51.46, 19.97. **HRMS** (FTMS + p ESI)  $m/z$ :  $[\text{M}+\text{H}]^+$  calculated for  $\text{C}_{12}\text{H}_{18}\text{NO}$ , 192.1383; found, 192.1382.

#### ***N*-(1-phenylethyl)butan-1-amine (S19)**

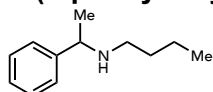

Prepared according to **General Procedure E** with butylamine (98.6  $\mu\text{L}$ , 10 equiv, 1.0 mmol) and 2-phenylpropanoic acid (0.015 g, 1.0 equiv, 0.10 mmol). Purification by flash chromatography on silica gel, eluting with 5-20% ethyl acetate in hexanes, afforded the product as a clear oil (11.9 mg, 67% yield). The spectral data matched those previously reported.<sup>31</sup>  **$^1\text{H}$  NMR** (500 MHz,  $\text{CDCl}_3$ )  $\delta$  7.39 – 7.28 (m, 4H), 7.27 – 7.19 (m, 1H), 3.75 (q,  $J$  = 6.6 Hz, 1H), 2.50 (ddd,  $J$  = 11.3, 8.0, 6.2 Hz, 1H), 2.42 (ddd,  $J$  = 11.3, 8.1, 6.8 Hz, 1H), 1.61 – 1.38 (m, 3H), 1.36 (d,  $J$  = 6.6 Hz, 3H), 1.34 – 1.21 (m, 2H), 0.87 (t,  $J$  = 7.3 Hz, 3H).  **$^{13}\text{C}$  NMR** (126 MHz,  $\text{CDCl}_3$ )  $\delta$  146.12, 128.52, 126.93, 126.68, 58.55, 47.73, 32.60, 24.52, 20.64, 14.14. **HRMS** (FTMS + p ESI)  $m/z$ :  $[\text{M}+\text{H}]^+$  calculated for  $\text{C}_{12}\text{H}_{20}\text{N}$ , 178.1590; found, 178.1587.

#### **4-methyl-*N*-(1-phenylethyl)aniline (S20)**

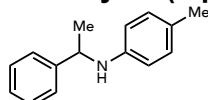

Prepared according to **General Procedure E** with *p*-toluidine (0.107 g, 10 equiv, 1.0 mmol) and 2-phenylpropanoic acid (0.015 g, 1.0 equiv, 0.10 mmol). Purification by flash chromatography on silica gel, eluting with 5-20% ethyl acetate in hexanes, afforded the product as a white solid (10.3 mg, 49% yield). The spectral data matched those previously reported.<sup>32</sup>  **$^1\text{H}$  NMR** (500 MHz,  $\text{CDCl}_3$ )  $\delta$  7.43 – 7.35 (m, 2H), 7.32 (t,  $J$  = 7.6 Hz, 2H), 7.26 – 7.20 (m, 1H), 6.91 (d,  $J$  = 8.3 Hz, 2H), 6.45 (d,  $J$  = 8.3 Hz, 2H), 4.47 (q,  $J$  = 6.7 Hz, 1H), 3.91 (br s, 1H), 2.20 (s, 3H), 1.52 (d,  $J$  = 6.7 Hz, 3H).  **$^{13}\text{C}$  NMR** (126 MHz,  $\text{CDCl}_3$ )  $\delta$  145.57, 145.17, 129.73, 128.74, 126.93, 126.50, 126.00, 113.56, 53.82, 25.18, 20.47. **mp**: 68.9 – 70.7  $^\circ\text{C}$  (lit.<sup>33</sup> 68 – 68.5  $^\circ\text{C}$ ). **HRMS** (FTMS + p ESI)  $m/z$ :  $[\text{M}-\text{H}]^-$  calculated for  $\text{C}_{15}\text{H}_{16}\text{N}$ , 210.1288; found, 210.1286.

---

## K. References

1. Pangborn, A. B., Giardello, M. A., Grubbs, R. H., Rosen, R. K., and Timmers, F. J. (1996). Safe and convenient procedure for solvent purification. *Organometallics* *15*, 1518. [10.1021/om9503712](https://doi.org/10.1021/om9503712).
2. Greenhalgh, M. D., Smith, S. M., Walden, D. M., Taylor, J. E., Brice, Z., Robinson, E. R. T., Fallan, C., Cordes, D. B., Slawin, A. M. Z., Richardson, H. C., et al. (2018). A C=O•••Isothiouonium Interaction Dictates Enantiodiscrimination in Acylative Kinetic Resolutions Of Tertiary Heterocyclic Alcohols. *Angew. Chem. Int. Ed.* *57*, 3200–3206. [10.1002/anie.201712456](https://doi.org/10.1002/anie.201712456).
3. Zhao, G. and Li, G.-I. (2006). Allylation of Aldehydes and Imines: Promoted by Reusable Polymer-Supported Sulfonamide of *N*-Glycine. *Org. Lett.* *8*, 633–636. [10.1021/ol0528235](https://doi.org/10.1021/ol0528235).
4. Li, L. and Hilt, G. (2020). Regiodivergent DH or HD Addition to Alkenes: Deuterohydrogenation versus Hydrodeuterogenation. *Org. Lett.* *22*, 1628–1632. [10.1021/acs.orglett.0c00213](https://doi.org/10.1021/acs.orglett.0c00213).
5. Xiao, L.-J., Cheng, L., Feng, W.-M., Li, M.-L., Xie, J.-H., and Zhou, Q.-L. (2018). Nickel(0)-Catalyzed Hydroarylation of Styrenes and 1,3-Dienes with Organoboron Compounds. *Angew. Chem. Int. Ed.* *57*, 461–464. [10.1002/anie.201710735](https://doi.org/10.1002/anie.201710735).
6. Duan, H., Meng, L., Bao, D., Zhang, H., Li, Y., and Lei, A. (2010). Zinc Chloride Enhanced Arylations of Secondary Benzyl Trifluoroacetates in the Presence of  $\beta$ -Hydrogen Atoms. *Angew. Chem. Int. Ed.* *49*, 6387–6390. [10.1002/ange.201002116](https://doi.org/10.1002/ange.201002116).
7. Sato, Y., Aoyama, T., Takido, T., and Kodomari, M. (2012). Direct alkylation of aromatics using alcohols in the presence of NaHSO<sub>4</sub>/SiO<sub>2</sub>. *Tetrahedron*, *68*, 7077–7081. [10.1016/j.tet.2012.06.063](https://doi.org/10.1016/j.tet.2012.06.063).
8. Qi, C., Gandon, V., and Leboeuf, D. (2018). Calcium(II)-Catalyzed Intermolecular Hydroarylation of Deactivated Styrenes in Hexafluoroisopropanol. *Angew. Chem. Int. Ed.* *57*, 14245–14249. [10.1002/anie.201809470](https://doi.org/10.1002/anie.201809470).
9. Watanabe, N., Natsugi, A., Nakano, K., Ichikawa, Y., and Kotsuki, H. (2014). Organocatalytic Friedel–Crafts Benzylolation of Heteroaromatic and Aromatic Compounds via an S<sub>N</sub>1 Pathway. *Synlett* *25*, 0438–0442. [10.1055/s-0033-1340343](https://doi.org/10.1055/s-0033-1340343).
10. Mertins, K., Iovel, I., Kischel, J., Zapf, A., and Beller, M. (2006). Gold-Catalyzed Benzylolation of Arenes and Heteroarenes. *Adv. Synth. Catal.* *348*, 691–695. [10.1002/adsc.200505433](https://doi.org/10.1002/adsc.200505433).
11. Majer, J., Kwiatkowski, P., and Jurczak, J. (2008). Highly Enantioselective Synthesis of 2-Furanyl-hydroxyacetates from Furans via the Friedel-Crafts Reaction. *Org. Lett.* *10*, 2955–2958. [10.1021/ol800927w](https://doi.org/10.1021/ol800927w).
12. Pandey, G., Laha, R., and Kumar Mondal, P. (2019). Heterocyclization involving benzylic C(sp<sup>3</sup>)-H functionalization enabled by visible light photoredox catalysis. *55*, 9689–9692. [10.1039/C9CC04287C](https://doi.org/10.1039/C9CC04287C).

- 
13. Lohre, C., Dröge, T., Wang, C., and Glorius, F. (2011). Nickel-Catalyzed Cross-Coupling of Aryl Bromides with Tertiary Grignard Reagents Utilizing Donor-Functionalized N-Heterocyclic Carbenes (NHCs). *Chem. Eur. J.* *17*, 6052–6055. [10.1002/chem.201100909](https://doi.org/10.1002/chem.201100909).
14. Lee, S. Y., Villani-Gale, A., and Eichman, C. C. (2016). Room Temperature Catalyst System for the Hydroarylation of Olefins. *Org. Lett.* *18*, 5034–5037. [10.1021/acs.orglett.6b02492](https://doi.org/10.1021/acs.orglett.6b02492).
15. Taniguchi, N. (2021). Zinc-Catalyzed Regioselective Addition of Alkyl Thiols to Alkenes via Anion or Radical Reactions. *Arkivoc* 125–137. [10.24820/ark.5550190.p011.447](https://doi.org/10.24820/ark.5550190.p011.447).
16. Li, Q. Y., Gockel, S. N., Lutovsky, G. A., DeGlopper, K. S., Baldwin, N. J., Bundesmann, M. W., Tucker, J. W., Bagley, S. W., and Yoon, T. P. (2022). Decarboxylative cross-nucleophile coupling via ligand-to-metal charge transfer photoexcitation of Cu(II) carboxylates. *Nat. Chem.* *14*, 94–99. [10.1038/s41557-021-00834-8](https://doi.org/10.1038/s41557-021-00834-8).
17. Nakagawa, M., Nagao, K., Ikeda, Z., Reynolds, M., Ibanex, I., Wang, J., Tokunaga, N., Sasaki, Y., and Ohmiya, H. (2021). Organophotoredox-Catalyzed Decarboxylative N-Alkylation of Sulfonamides. *ChemCatChem* *13*, 3930–3933. [10.1002/cctc.202100803](https://doi.org/10.1002/cctc.202100803).
18. Barton, D. H. R., Hay-Motherwell, R. S., and Motherwell, W. B. (1983). Functionalisation of saturated hydrocarbons. Part 1. Some reactions of a ferrous chloride–chloramine-T complex with hydrocarbons. *J. Chem. Soc., Perkin Trans. 1* 445–451. [10.1039/P19830000445](https://doi.org/10.1039/P19830000445).
19. Born, K. and Doye, S. (2011). Zirconium-Catalyzed Intermolecular Hydroamination of Alkynes with Primary Amines. *Eur. J. Org. Chem.* 764–771. [10.1002/ejoc.201101298](https://doi.org/10.1002/ejoc.201101298).
20. Maccallini, C., Patruno, A., Lannutti, F., Ammazalorso, A., De Filippis, B., Fantacuzzi, M., Franceshelli, S., Giampietro, L., Masella, S., Felaco, M., et al. (2010). N-Substituted acetamidines and 2-methylimidazole derivatives as selective inhibitors of neuronal nitric oxide synthase. *Bioorg. Med. Chem. Lett.* *20*, 6495–6499. [10.1016/j.bmcl.2010.09.059](https://doi.org/10.1016/j.bmcl.2010.09.059).
21. He, J., Chen, G., Zhang, B., Li, Y., Chen, J.-R., Xiao, W.-J., Liu, F., and Li, C. (2020). Catalytic Decarboxylative Radical Sulfonylation. *Chem* *6*, 1149–1159. [10.1016/j.chempr.2020.02.003](https://doi.org/10.1016/j.chempr.2020.02.003).
22. Gevorgyan, A., Hopmann, K. H., and Bayer, A. (2020). Exploration of New Biomass-Derived Solvents: Application to Carboxylation Reactions. *ChemSusChem* *13*, 2080–2088. [10.1002/cssc.201903224](https://doi.org/10.1002/cssc.201903224).
23. Liu, Y., Ma, X., Liu, Y., Liu, P., and Dai, B. (2018). Synthesis of  $\alpha$ -arylalkylferrocenes through cesium fluoride-promoted coupling of arylboronic acids with N-tosylhydrazones. *Synthetic Communications* *48*, 921–928. [10.1080/00397911.2018.1428816](https://doi.org/10.1080/00397911.2018.1428816).
24. Xiang, J., Shang, M., Kawamata, Y., Lundberg, H., Reisberg, S. H., Chen, M., Mykhailiuk, P., Beutner, G., Collins, M. R., Davies, A. et al. (2019). Hindered dialkyl ether synthesis with electrogenerated carbocations. *Nature* *573*, 398–402. [10.1038/s41586-019-1539-y](https://doi.org/10.1038/s41586-019-1539-y).
25. Yang, P., Zhang, L., Fu, K., Sun, Y., Wang, X., Yue, J., Ma, Y., and Tang, B. (2020). Nickel-Catalyzed Asymmetric Transfer Hydrogenation and  $\alpha$ -Selective Deuteration of N-Sulfonyl Imines with Alcohols: Access to  $\alpha$ -Deuterated Chiral Amines. *Org. Lett.* *22*, 8278–8284. [10.1021/acs.orglett.0c02921](https://doi.org/10.1021/acs.orglett.0c02921).



- 
26. Dal Zotto, C., Michaux, J., Zarate-Ruiz, A., Gayon, E., Virieux, D., Campagne, J.-M., Terrasson, V., Pieters, G., Gaucher, A., and Prim, D. (2010). FeCl<sub>3</sub>-catalyzed addition of nitrogen and 1,3-dicarbonyl nucleophiles to olefins. *J. Organomet. Chem.* 696, 296–304. [10.1016/j.jorganchem.2010.09.031](https://doi.org/10.1016/j.jorganchem.2010.09.031).
27. Fu, W., Shen, R., Bai, E., Zhang, L., Chen, Q., Fang, Z., Li, G., Yi, X., Zheng, A., and Tang, T. (2018). Reaction Route and Mechanism of the Direct N-Alkylation of Sulfonamides on Acidic Mesoporous Zeolite  $\beta$ -Catalyst. *ACS Catal.* 8, 9043–9055. [10.1021/acscatal.8b02030](https://doi.org/10.1021/acscatal.8b02030).
28. Taylor, J. G., Whittall, N., and Hii, K. K. (2006). Copper-catalyzed intermolecular hydroamination of alkenes. *Org. Lett.* 8, 3561–3564. [10.1021/ol061355b](https://doi.org/10.1021/ol061355b).
29. Yamada, K., Yamamoto, Y., Maekawa, M., Akindede, T., Umeki, H., and Tomioka, K. (2006). Tin-Free Intermolecular Addition of Primary Alkyls to Imines via the Dimethylzinc-Air Radical Process. *Org. Lett.* 8, 87–89. [10.1021/ol062499t](https://doi.org/10.1021/ol062499t).
30. Hamid, M. H. S. A., Allen, C. L., Lamb, G. W., Maxwell, A. C., Maytum, H. C., Watson, A. J. A., and Williams, J. M. J. (2009). Ruthenium-Catalyzed N-Alkylation of Amines and Sulfonamides Using Borrowing Hydrogen Methodology. *J. Am. Chem. Soc.* 131, 1766–1774. [10.1021/ja807323a](https://doi.org/10.1021/ja807323a).
31. Watson, A. J. A., Maxwell, A. C., and Williams, J. M. J. (2011). Borrowing Hydrogen Methodology for Amine Synthesis under Solvent-Free Microwave Conditions. *J. Org. Chem.* 76, 2328–2331. [10.1021/jo102521a](https://doi.org/10.1021/jo102521a).
32. Duan, H., Sengupta, S., Peterson, J. L., Akhmedov, N. G., and Shi, X. (2009). Triazole-Au(I) Complexes: A New Class of Catalysts with Improved Thermal Stability and Reactivity for Intermolecular Alkyne Hydroamination. *J. Am. Chem. Soc.* 131, 12100–12102. [10.1021/ja9041093](https://doi.org/10.1021/ja9041093).
33. Hart, H., and Kosak, J. R. (1962). Mechanism of rearrangement of N-alkylanilines. *J. Org. Chem.* 27, 116–121. [10.1021/jo01048a029](https://doi.org/10.1021/jo01048a029).

## L. NMR spectra

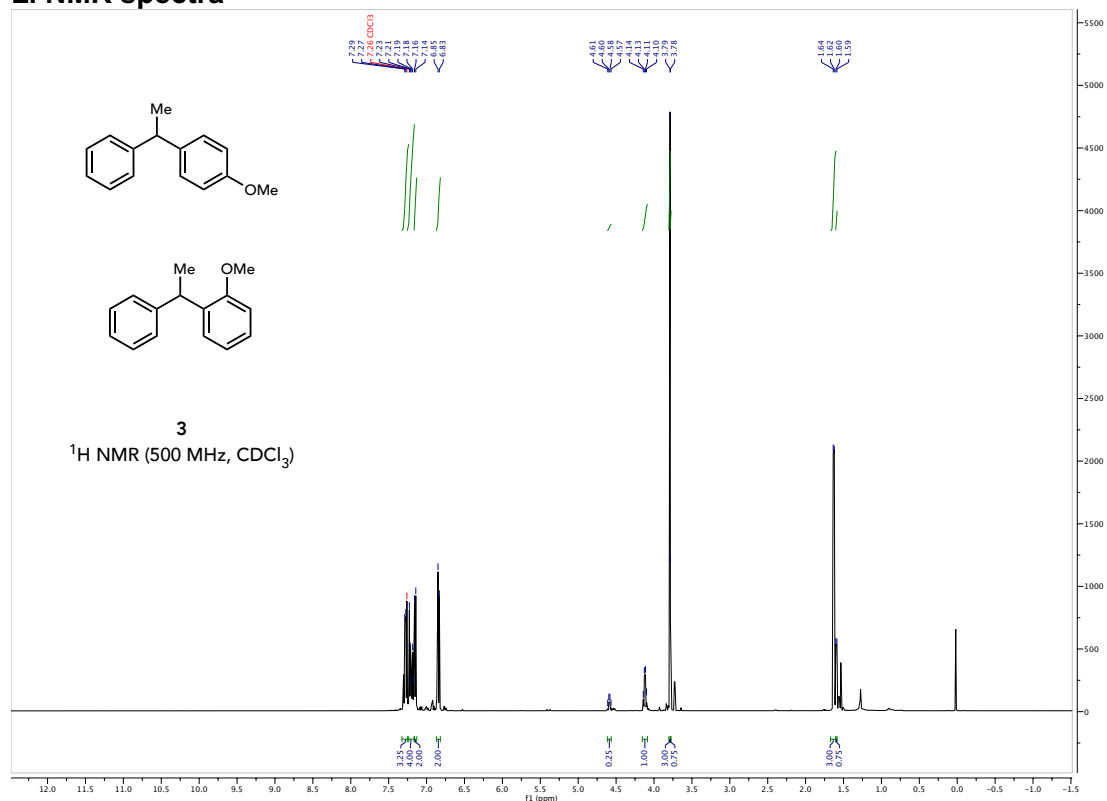

Figure S12. 500 MHz <sup>1</sup>H NMR spectrum of **3** in CDCl<sub>3</sub>.

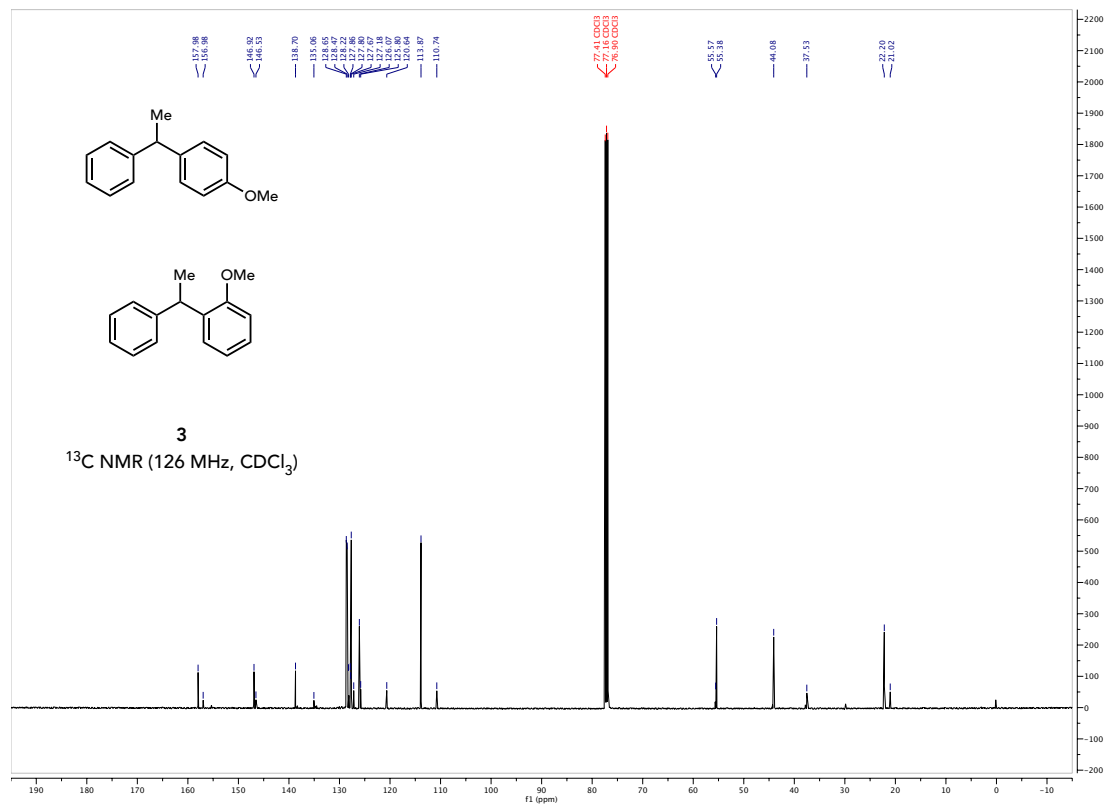

Figure S13. 126 MHz <sup>13</sup>C NMR spectrum of **3** in CDCl<sub>3</sub>.

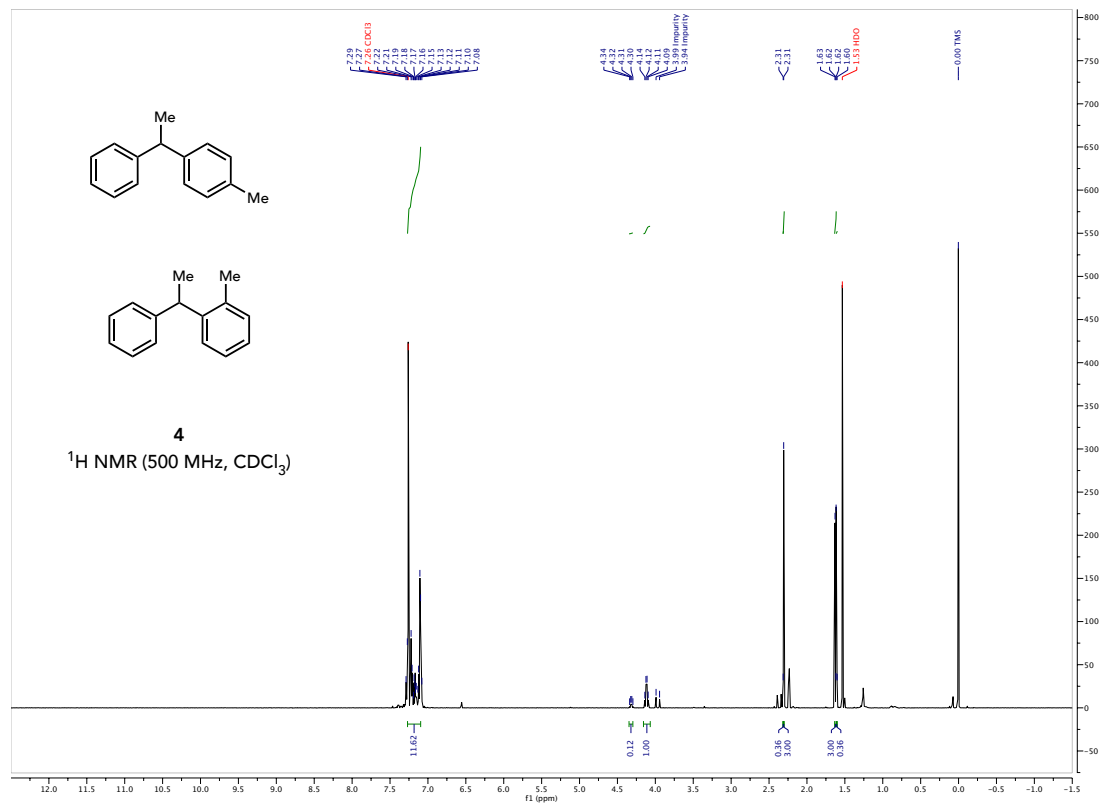

Figure S14. 500 MHz <sup>1</sup>H NMR spectrum of **4** in CDCl<sub>3</sub>.

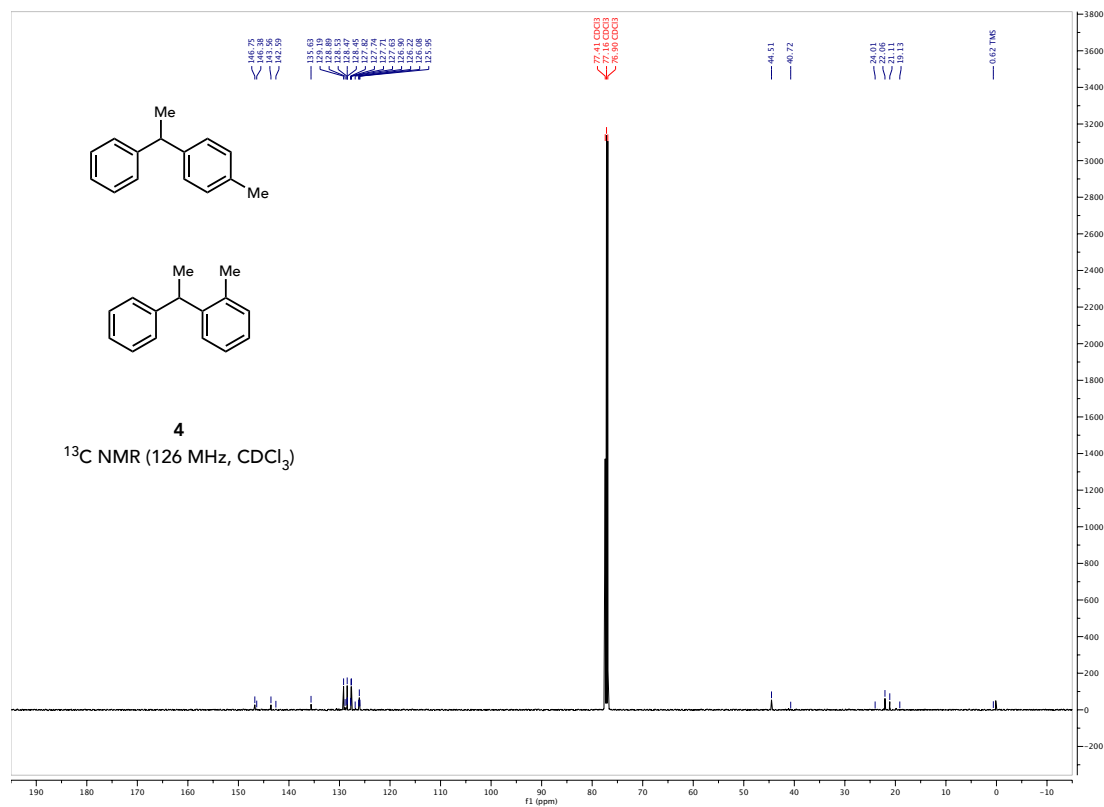

Figure S15. 126 MHz <sup>13</sup>C NMR spectrum of **4** in CDCl<sub>3</sub>.

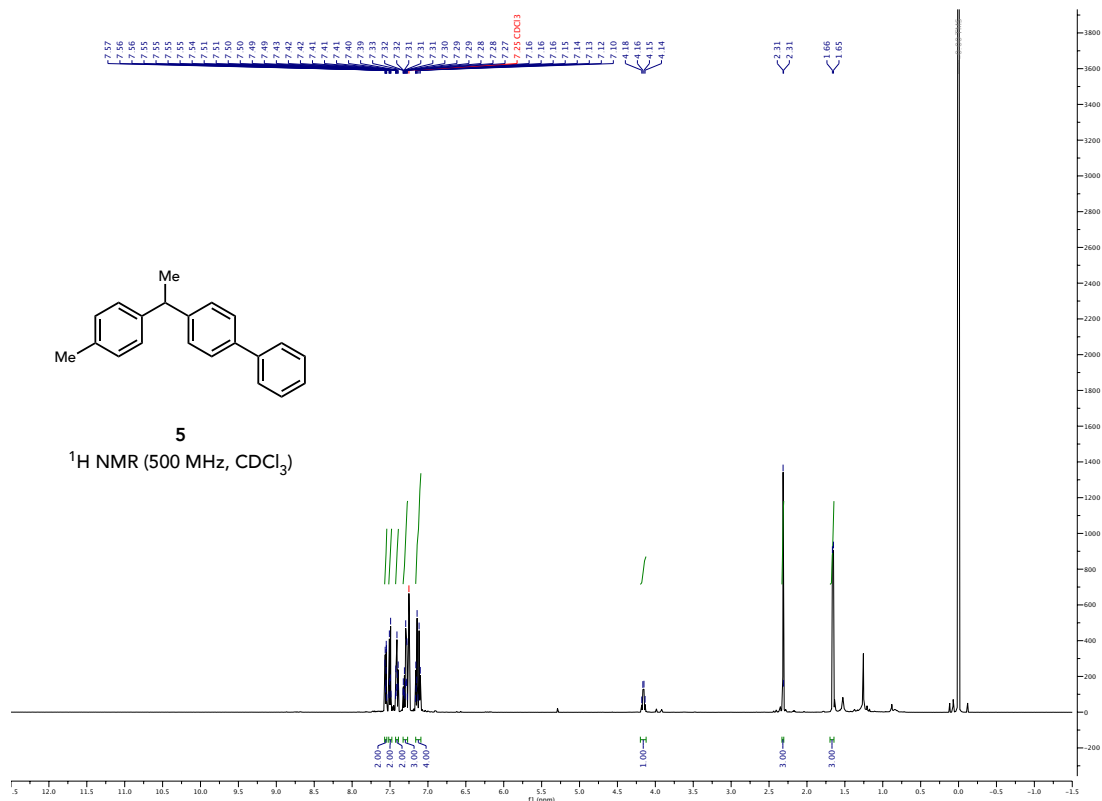

Figure S16. 500 MHz <sup>1</sup>H NMR spectrum of **5** in CDCl<sub>3</sub>.

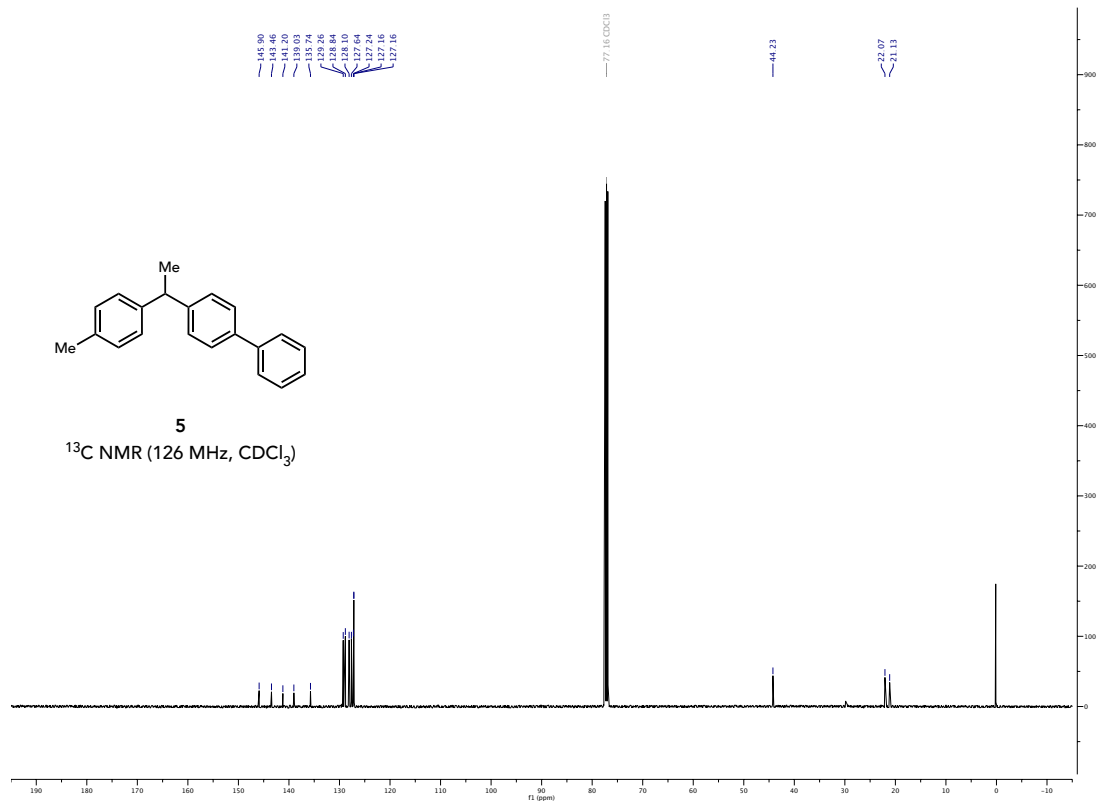

Figure S17. 126 MHz <sup>13</sup>C NMR spectrum of **5** in CDCl<sub>3</sub>.



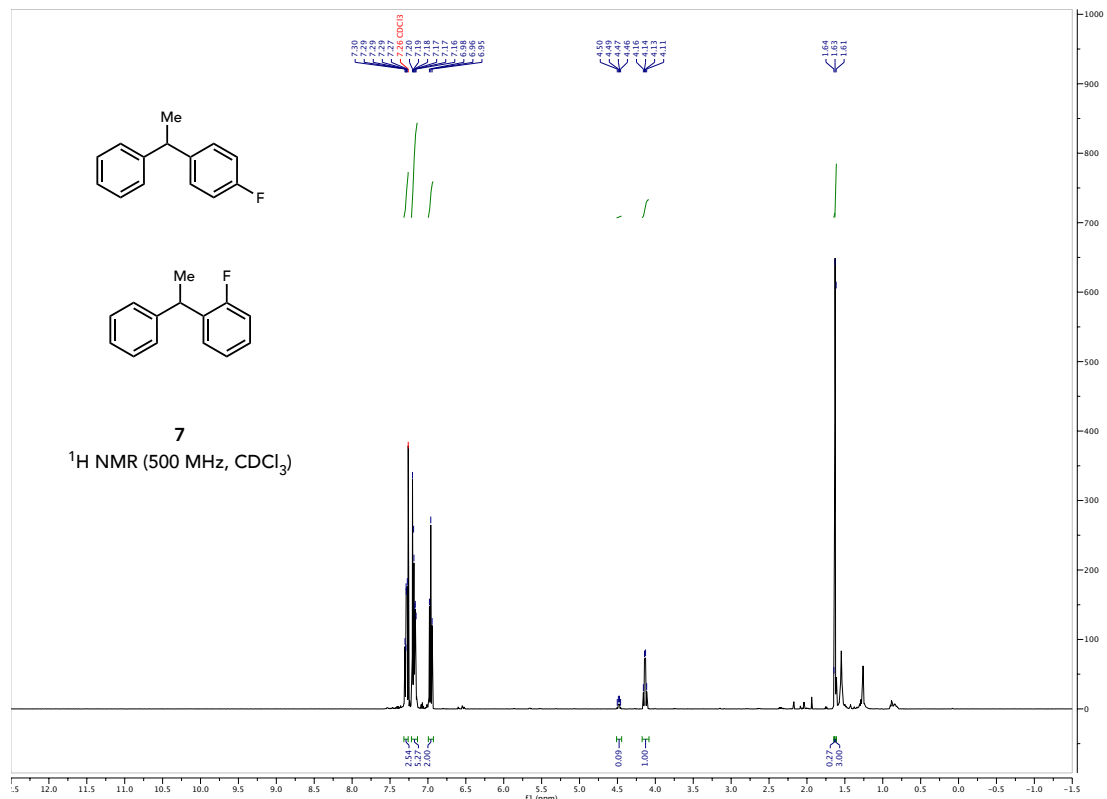

Figure S20. 500 MHz <sup>1</sup>H NMR spectrum of 7 in CDCl<sub>3</sub>.

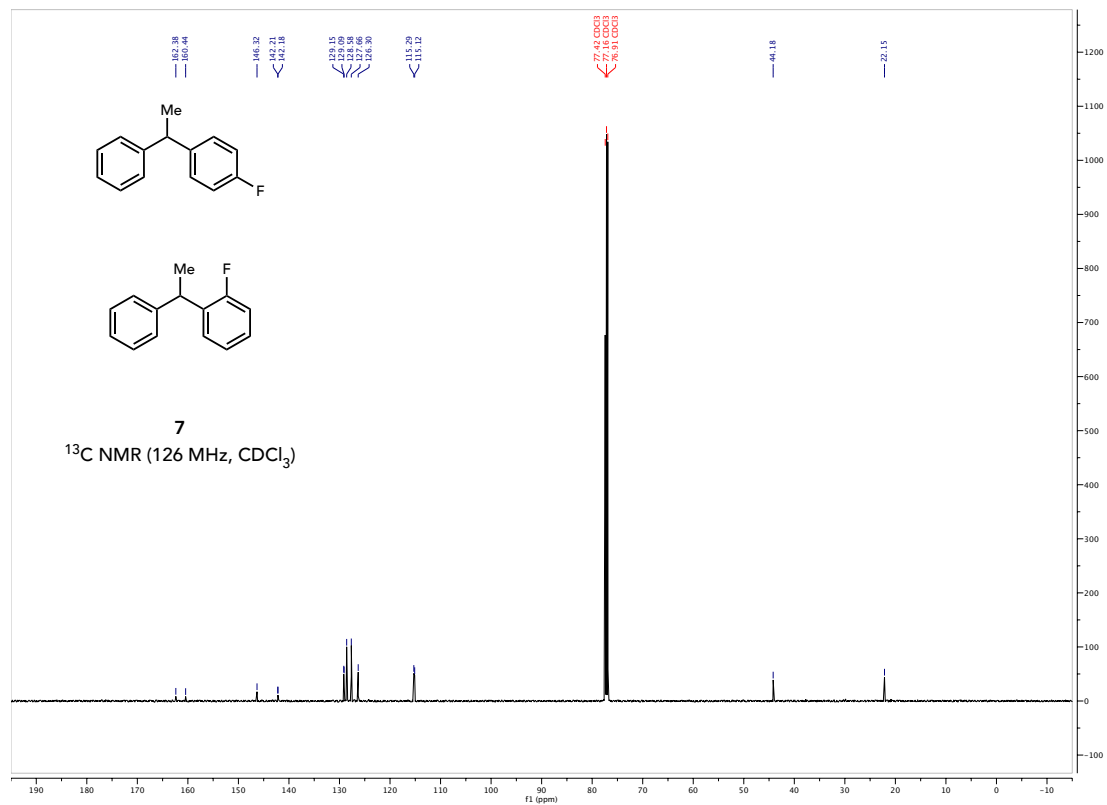

Figure S21. 126 MHz <sup>13</sup>C NMR spectrum of 7 in CDCl<sub>3</sub>.

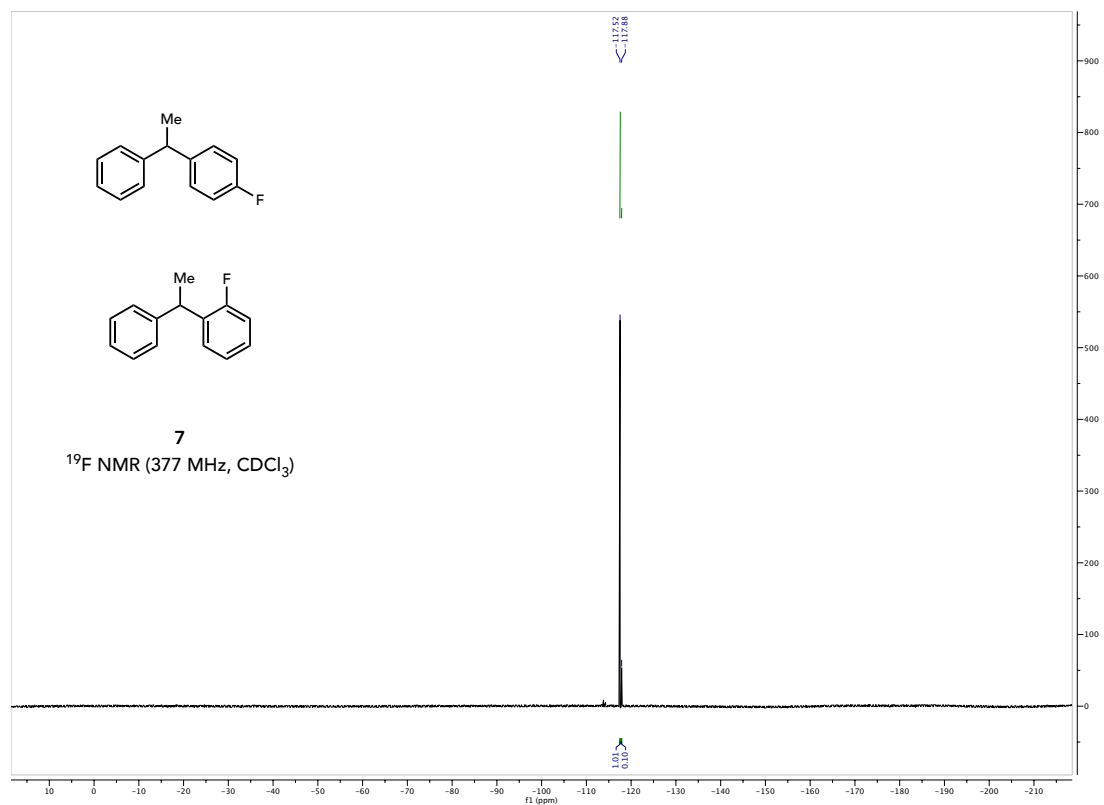

Figure S22. 377 MHz  $^{19}\text{F}$  NMR spectrum of 7 in  $\text{CDCl}_3$ .

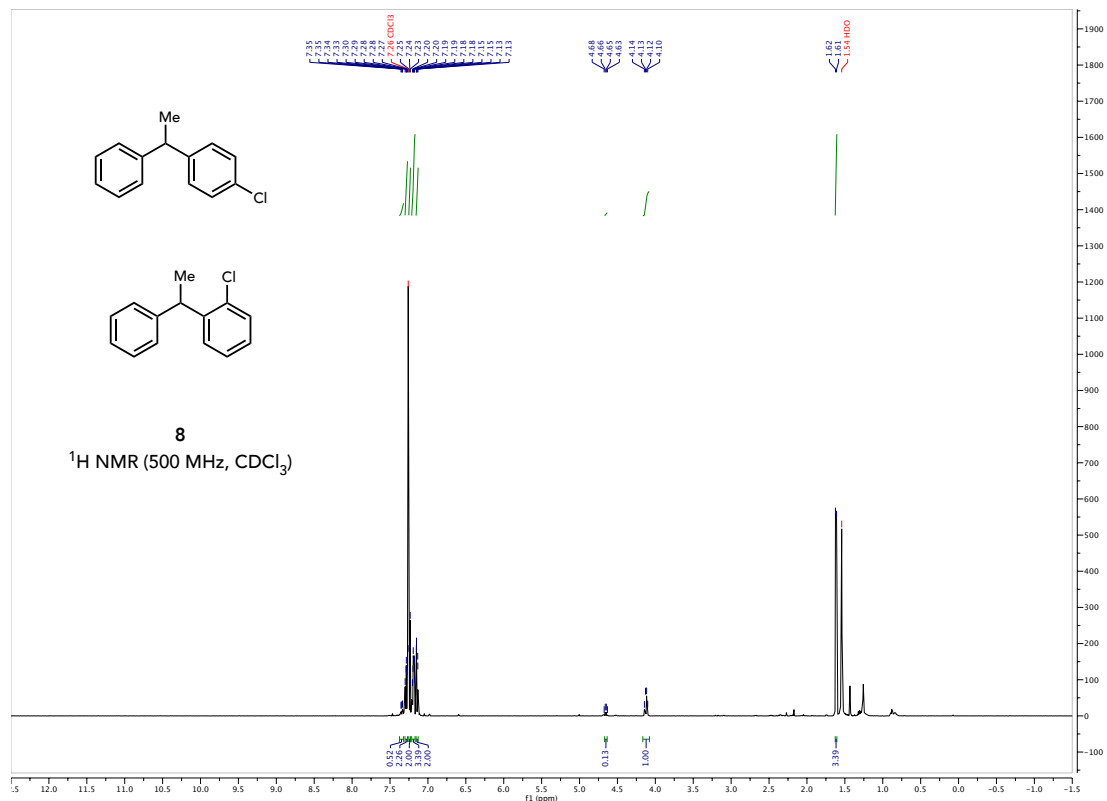

Figure S23. 500 MHz <sup>1</sup>H NMR spectrum of **8** in CDCl<sub>3</sub>.

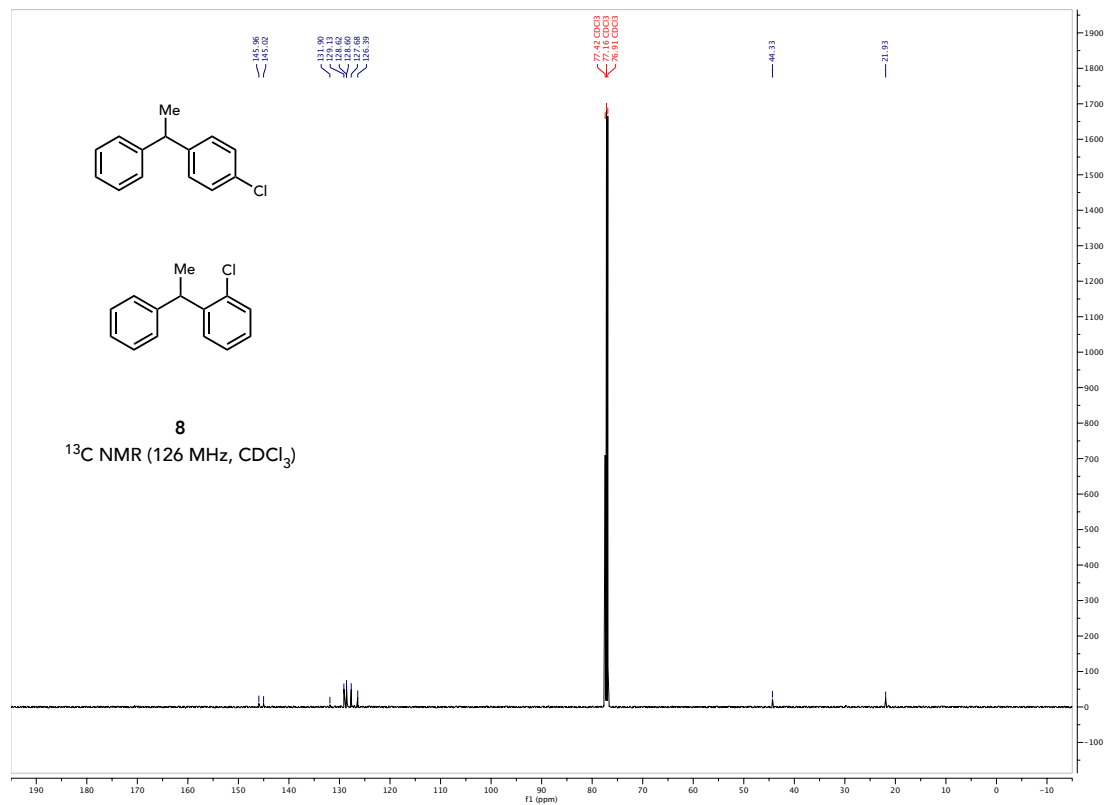

Figure S24. 126 MHz <sup>13</sup>C NMR spectrum of **8** in CDCl<sub>3</sub>.



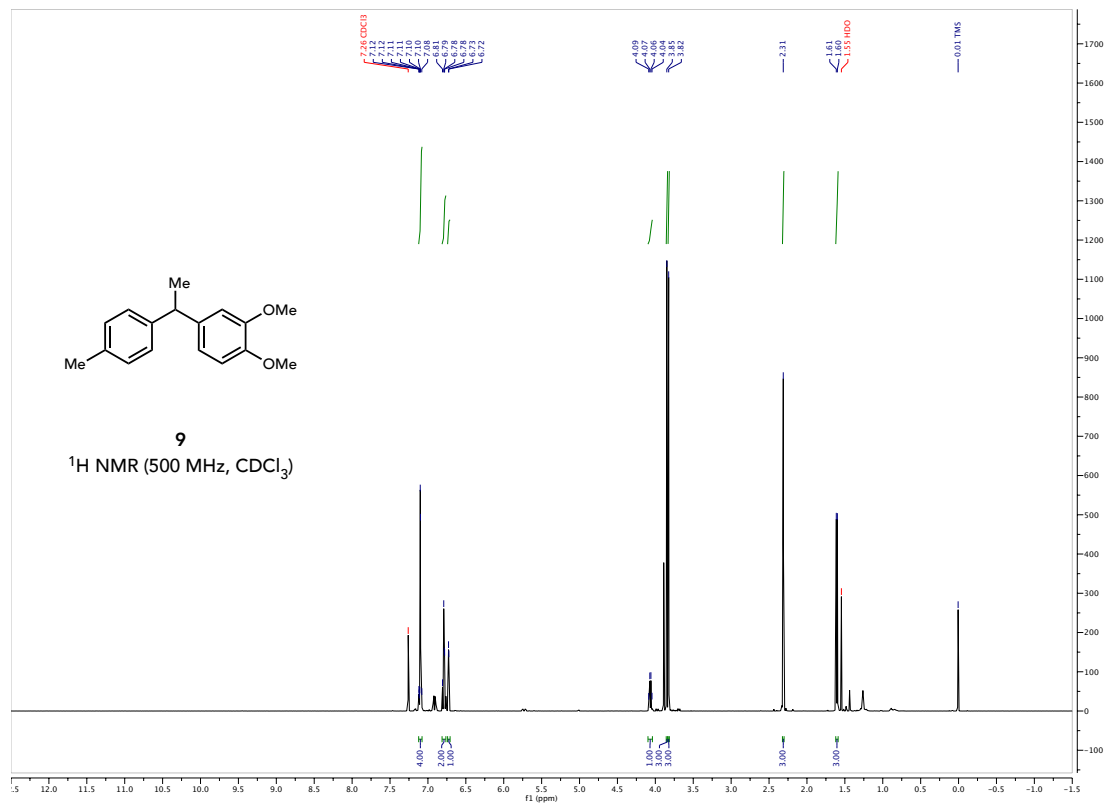

Figure S25. 500 MHz  $^1\text{H NMR}$  spectrum of **9** in  $\text{CDCl}_3$ .

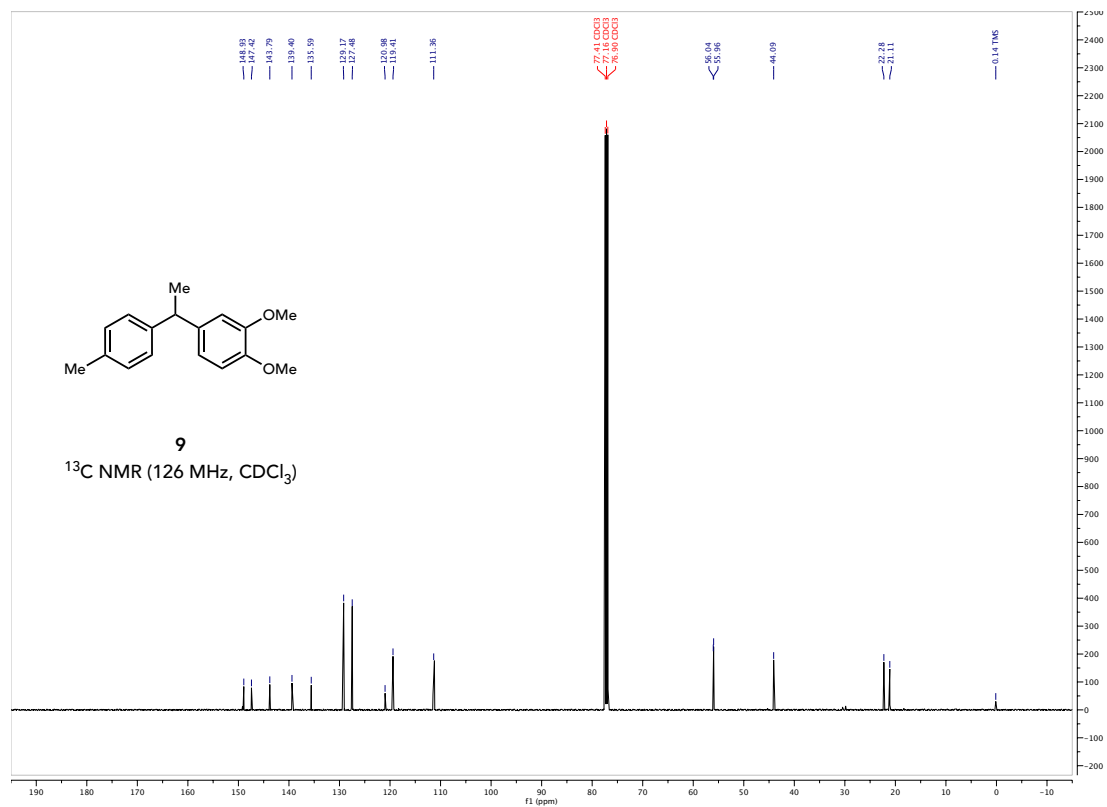

Figure S26. 126 MHz  $^{13}\text{C NMR}$  spectrum of **9** in  $\text{CDCl}_3$ .

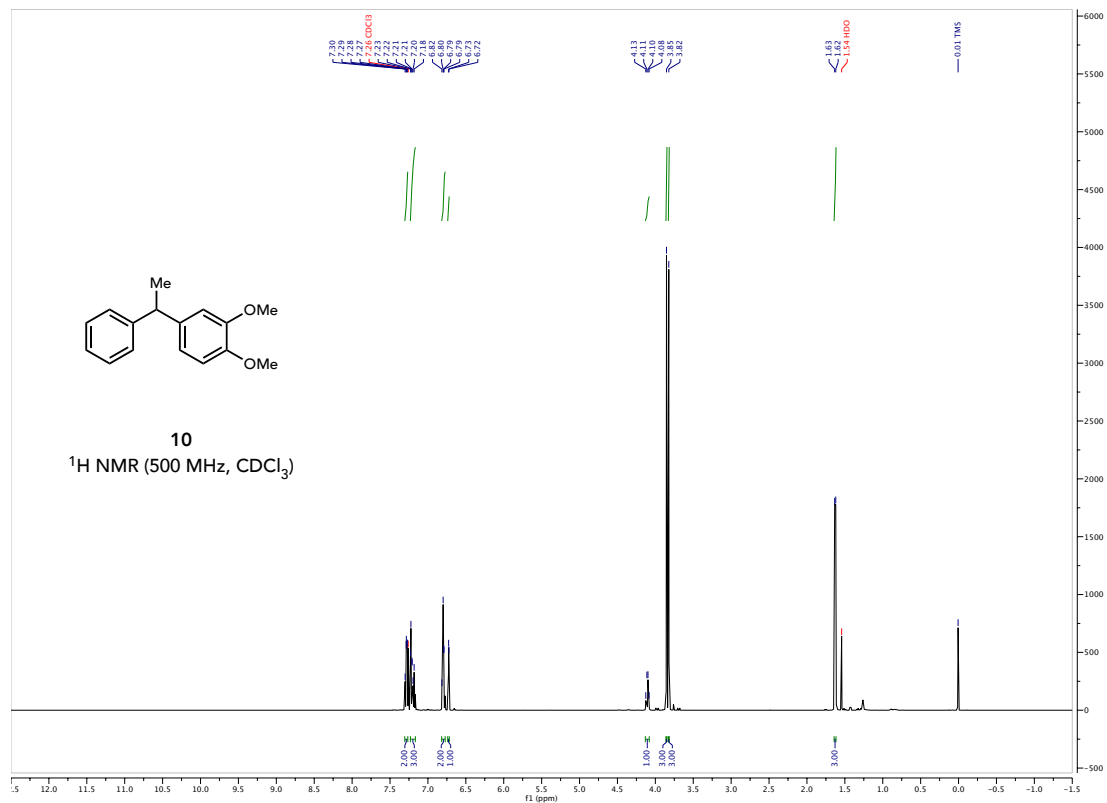

Figure S27. 500 MHz  $^1\text{H NMR}$  spectrum of **10** in  $\text{CDCl}_3$ .

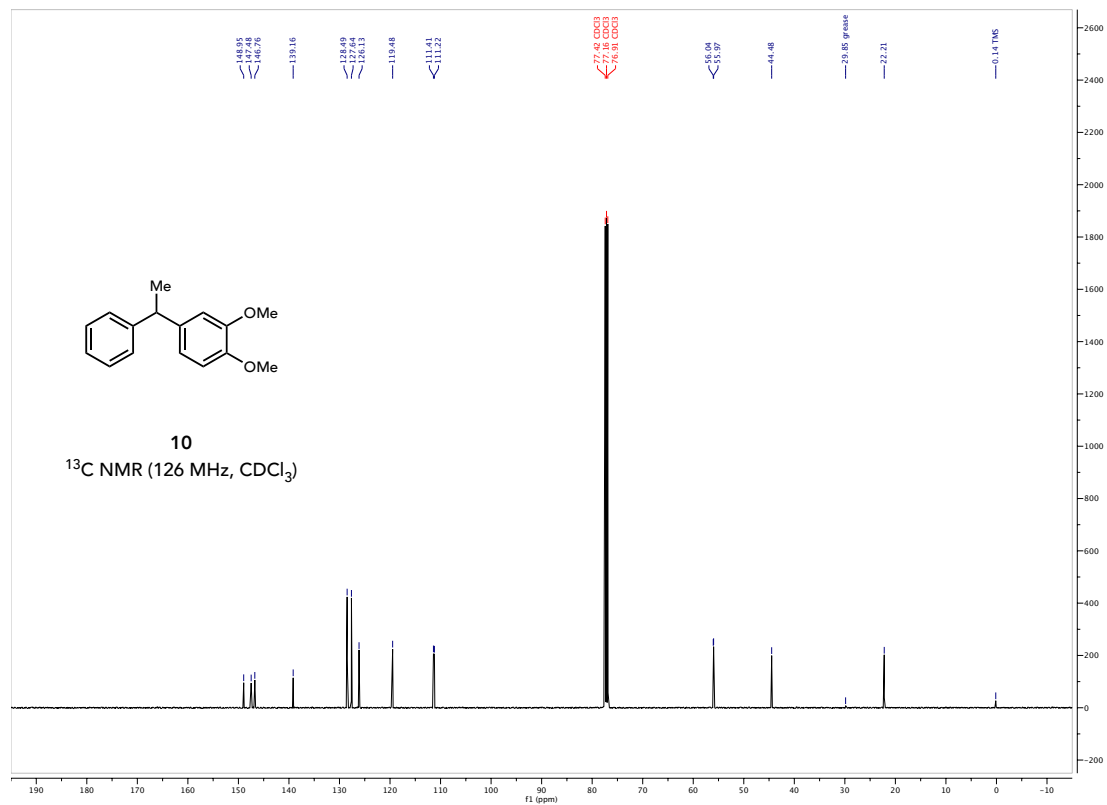

Figure S28. 126 MHz  $^{13}\text{C NMR}$  spectrum of **10** in  $\text{CDCl}_3$ .



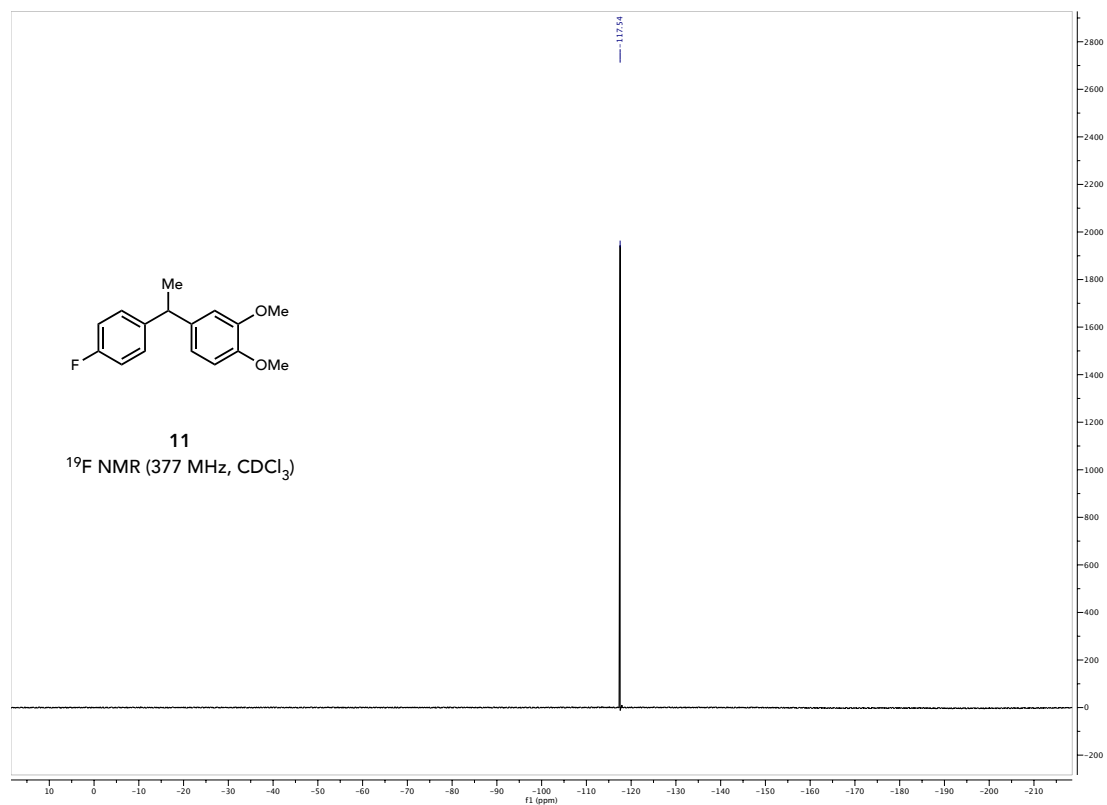

**Figure S31.** 377 MHz  $^{19}\text{F}$  NMR spectrum of **11** in  $\text{CDCl}_3$ .

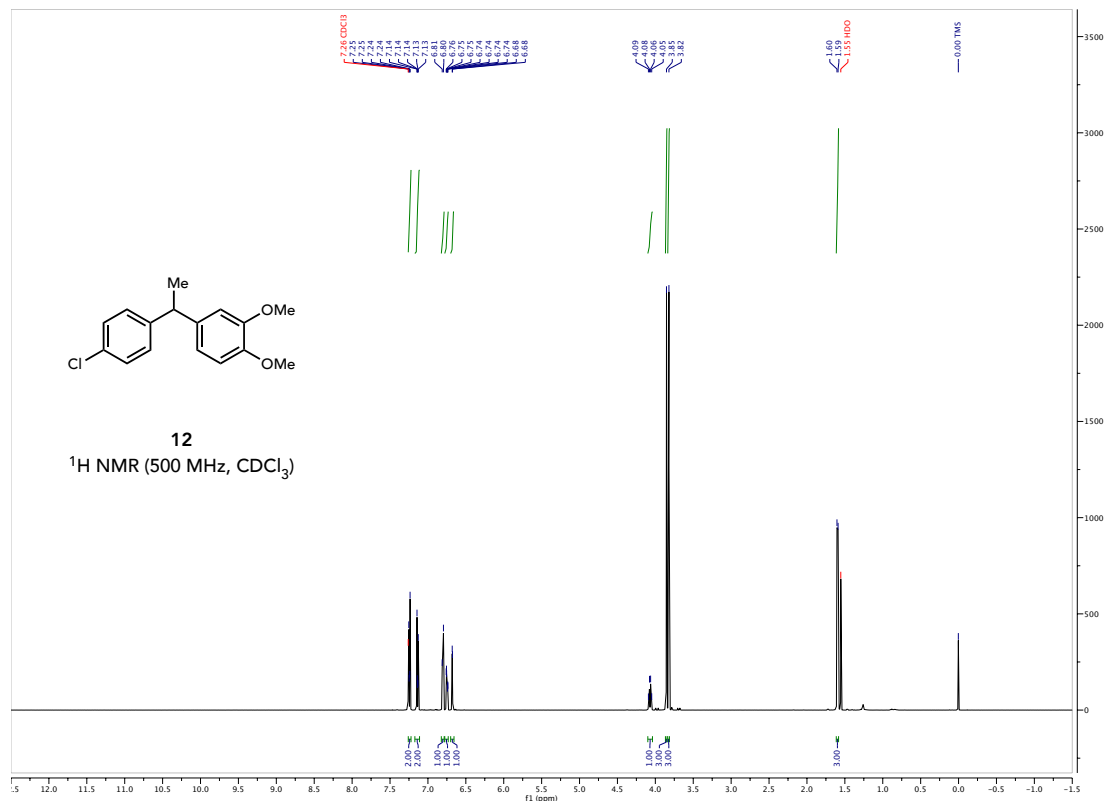

**Figure S32.** 500 MHz  $^1\text{H NMR}$  spectrum of **12** in  $\text{CDCl}_3$ .

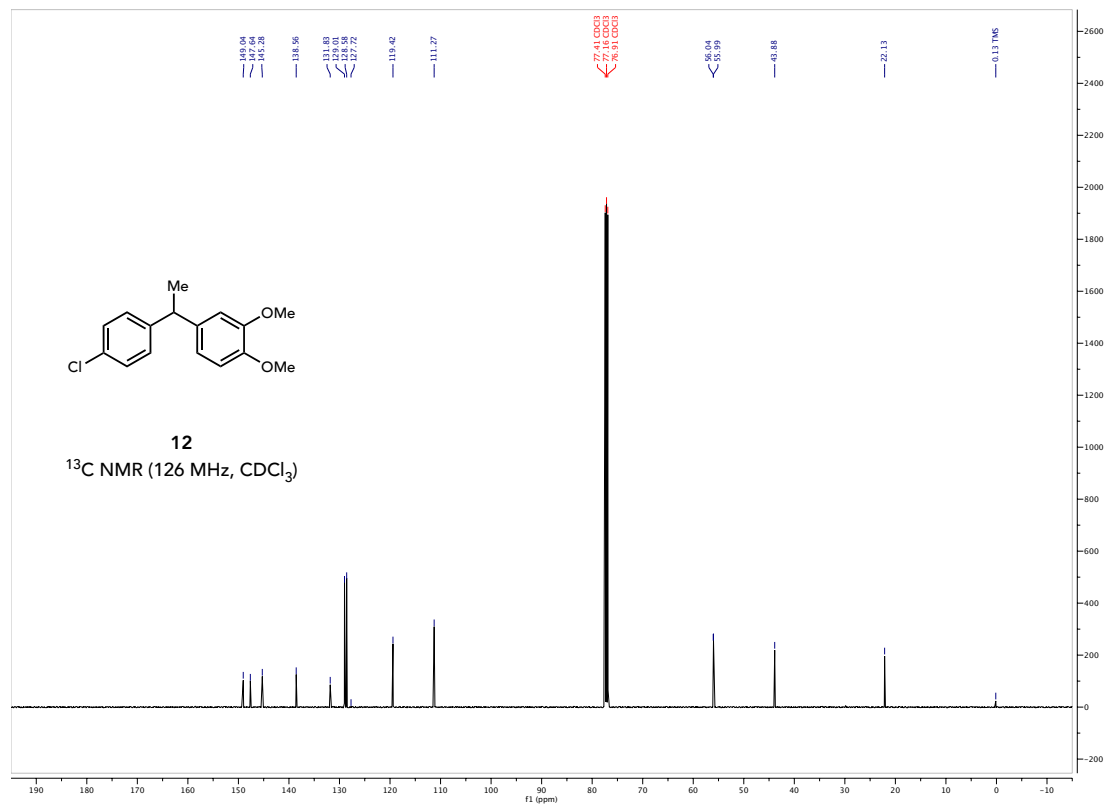

**Figure S33.** 126 MHz  $^{13}\text{C NMR}$  spectrum of **12** in  $\text{CDCl}_3$ .

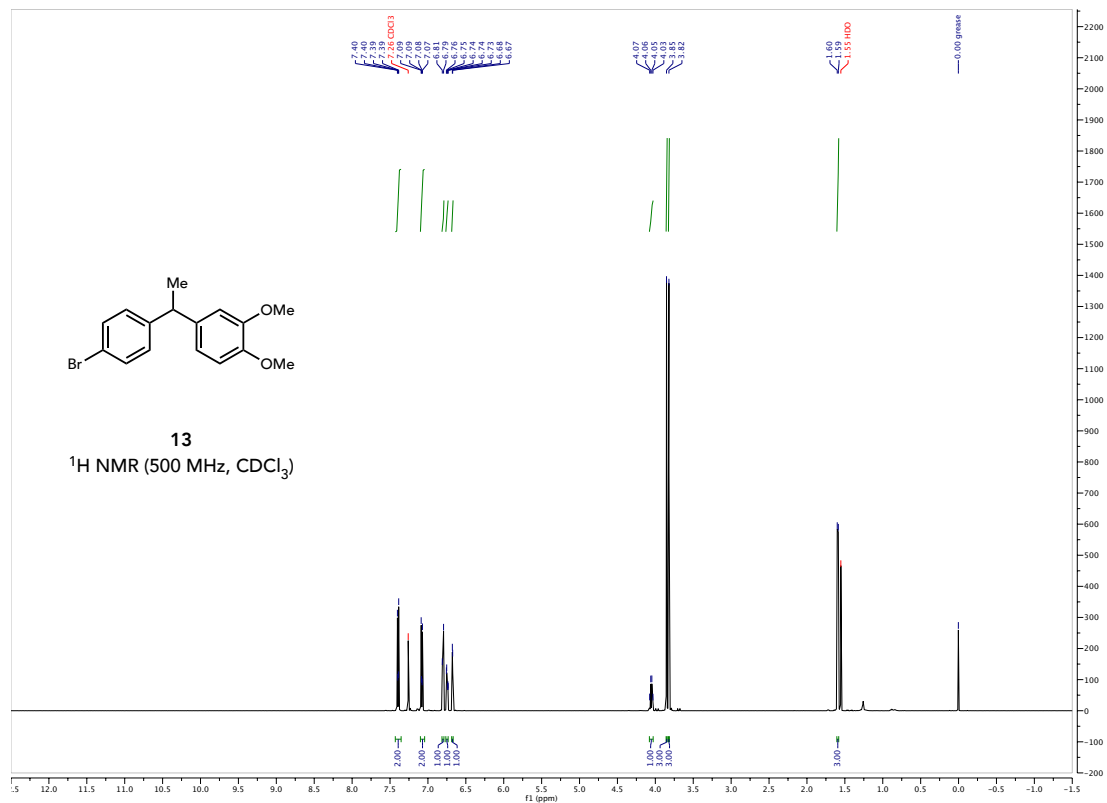

**Figure S34.** 500 MHz  $^1\text{H NMR}$  spectrum of **13** in  $\text{CDCl}_3$ .

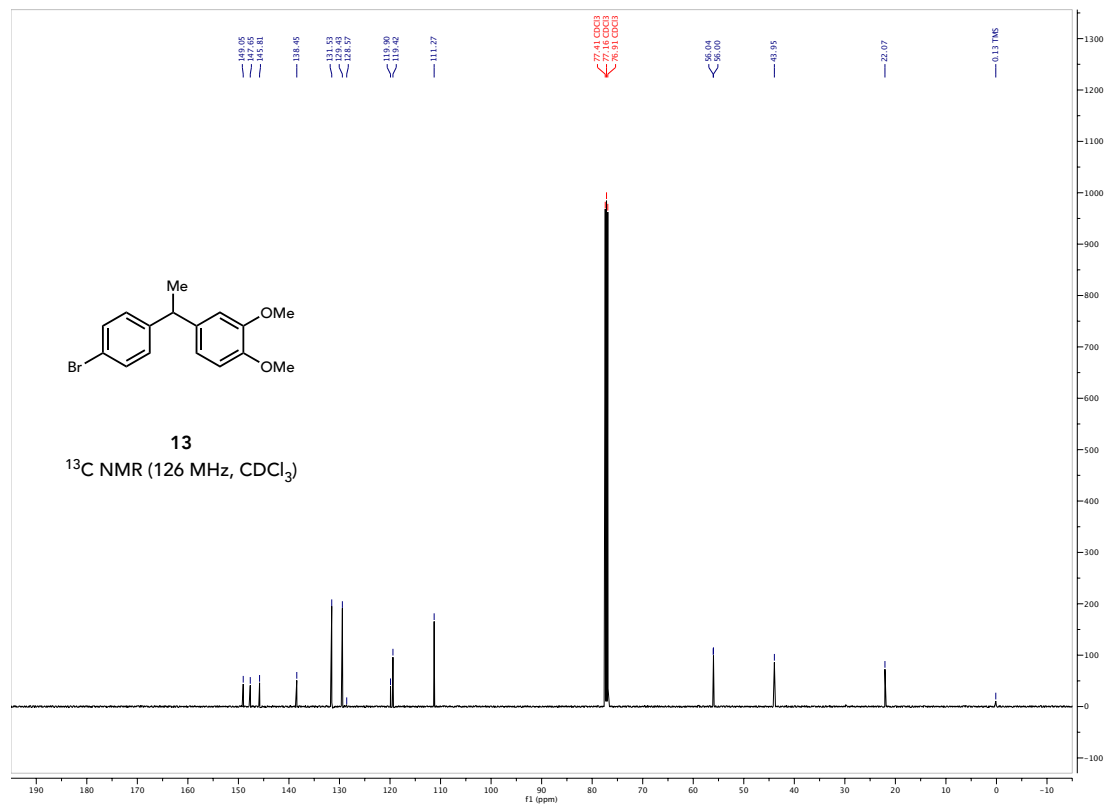

**Figure S35.** 126 MHz  $^{13}\text{C NMR}$  spectrum of **13** in  $\text{CDCl}_3$ .

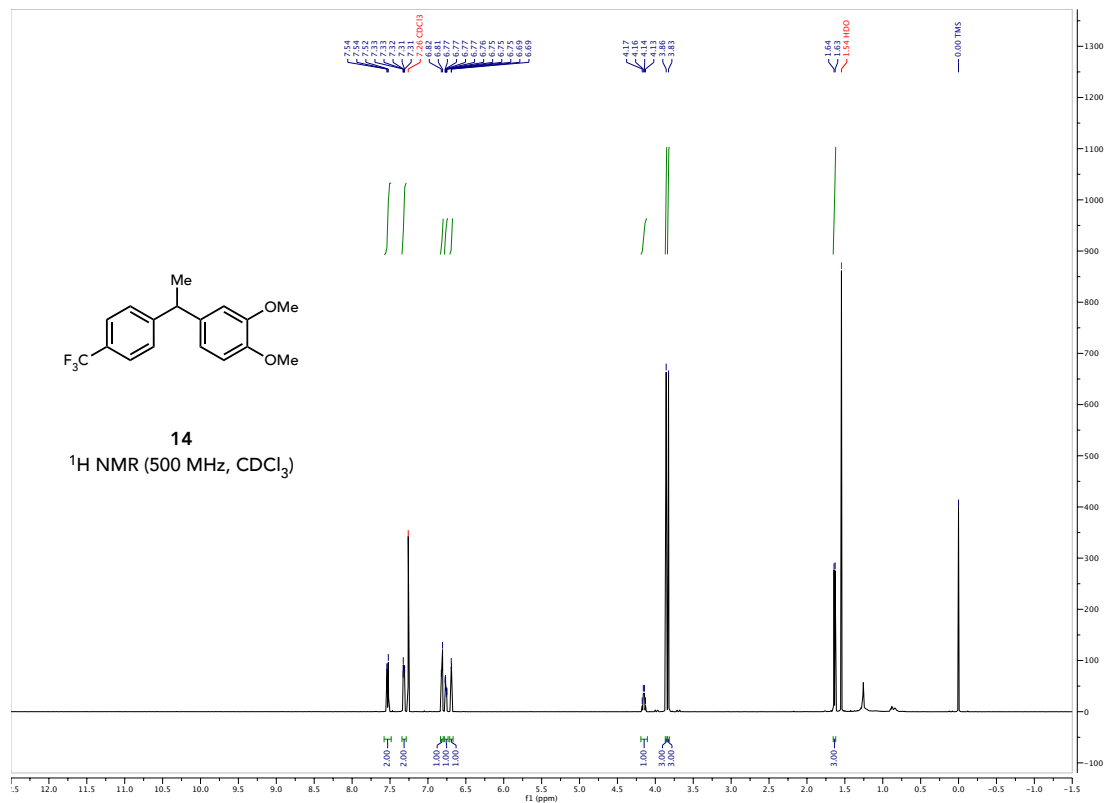

Figure S36. 500 MHz  $^1\text{H NMR}$  spectrum of **14** in  $\text{CDCl}_3$ .

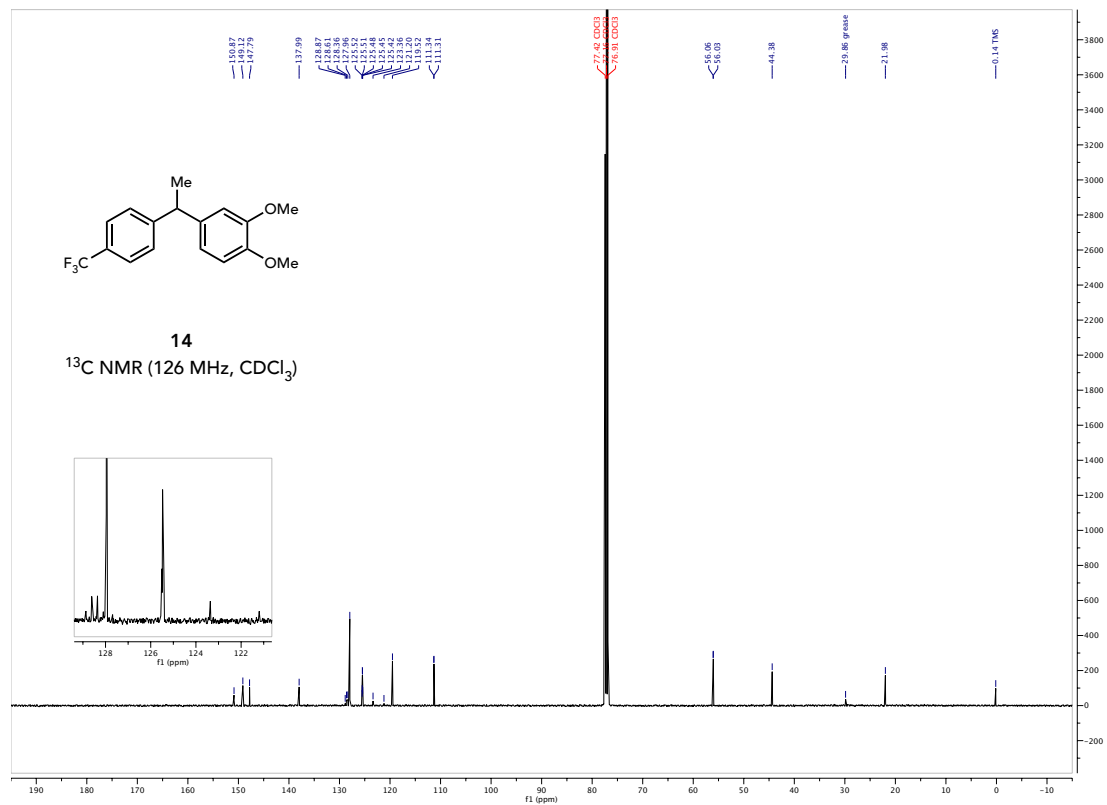

Figure S37. 126 MHz  $^{13}\text{C NMR}$  spectrum of **14** in  $\text{CDCl}_3$ .

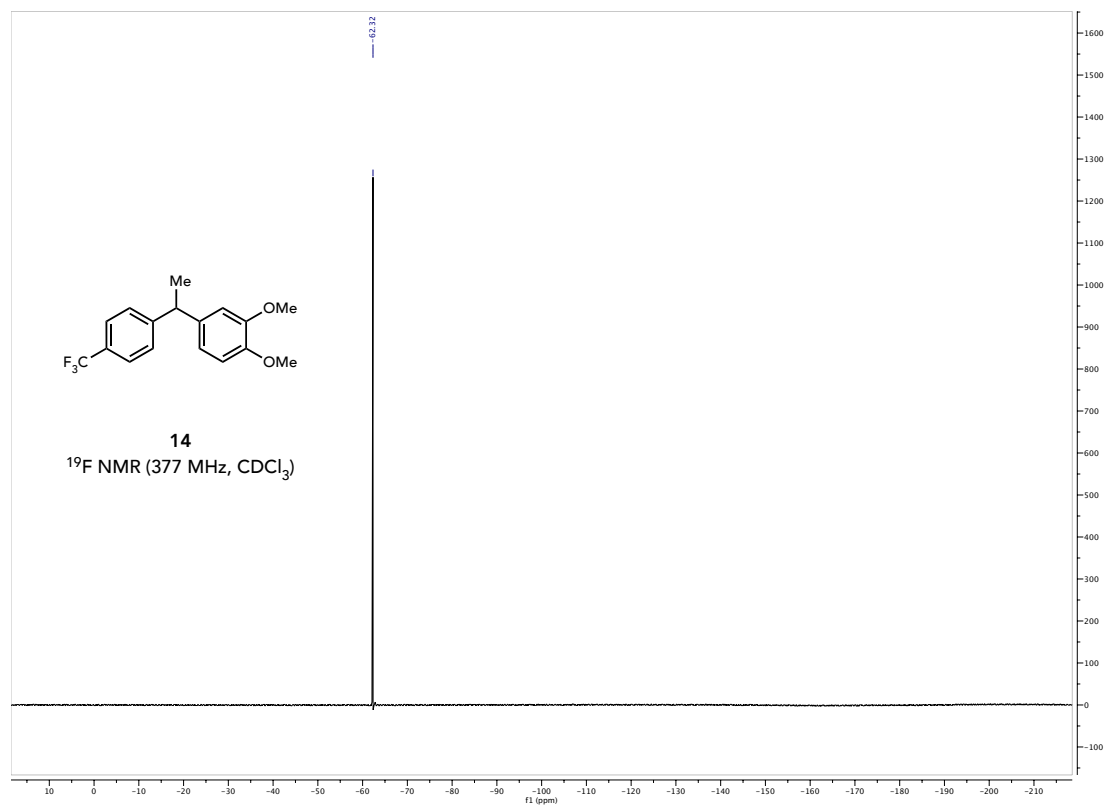

**Figure S38.** 377 MHz  $^{19}\text{F}$  NMR spectrum of **14** in  $\text{CDCl}_3$ .



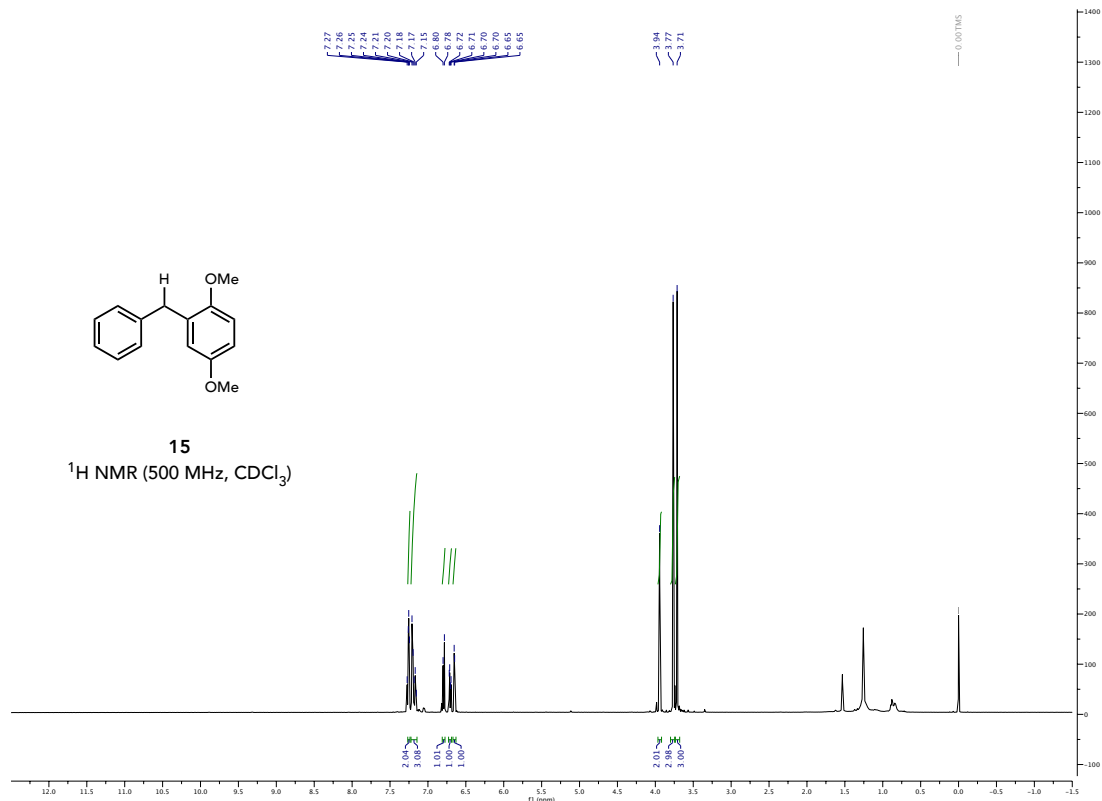

Figure S39. 500 MHz <sup>1</sup>H NMR spectrum of **15** in CDCl<sub>3</sub>.

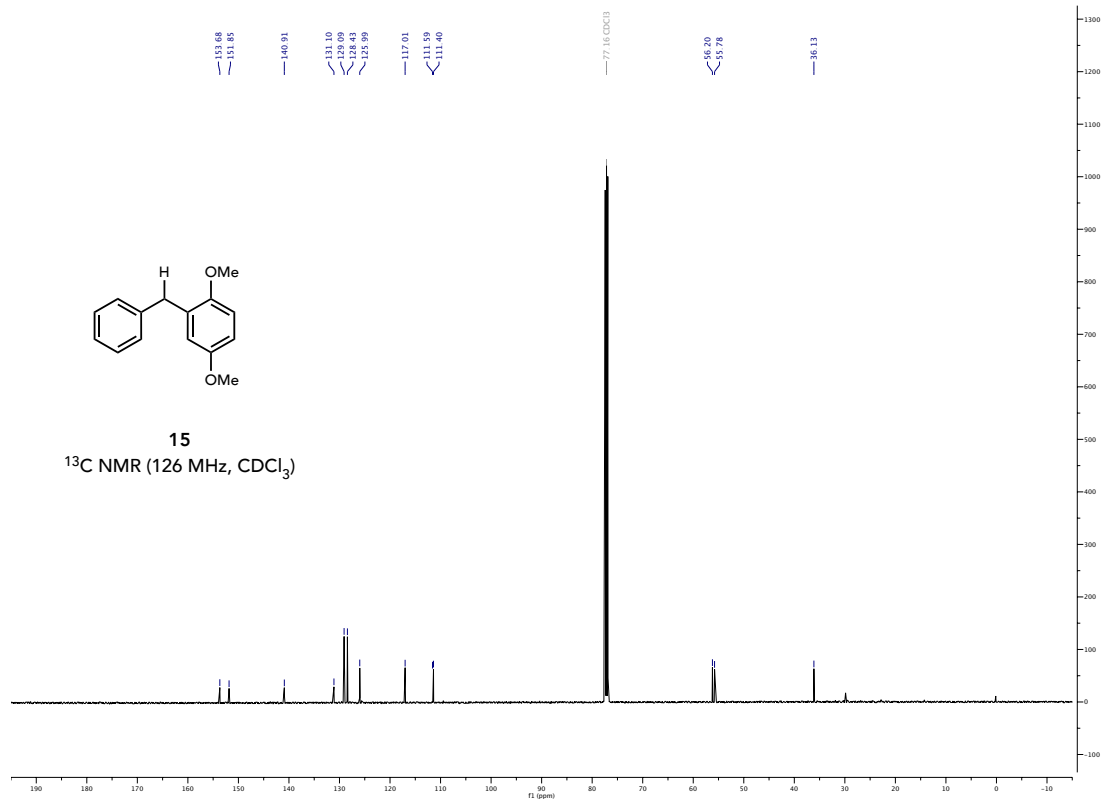

Figure S40. 126 MHz <sup>13</sup>C NMR spectrum of **15** in CDCl<sub>3</sub>.

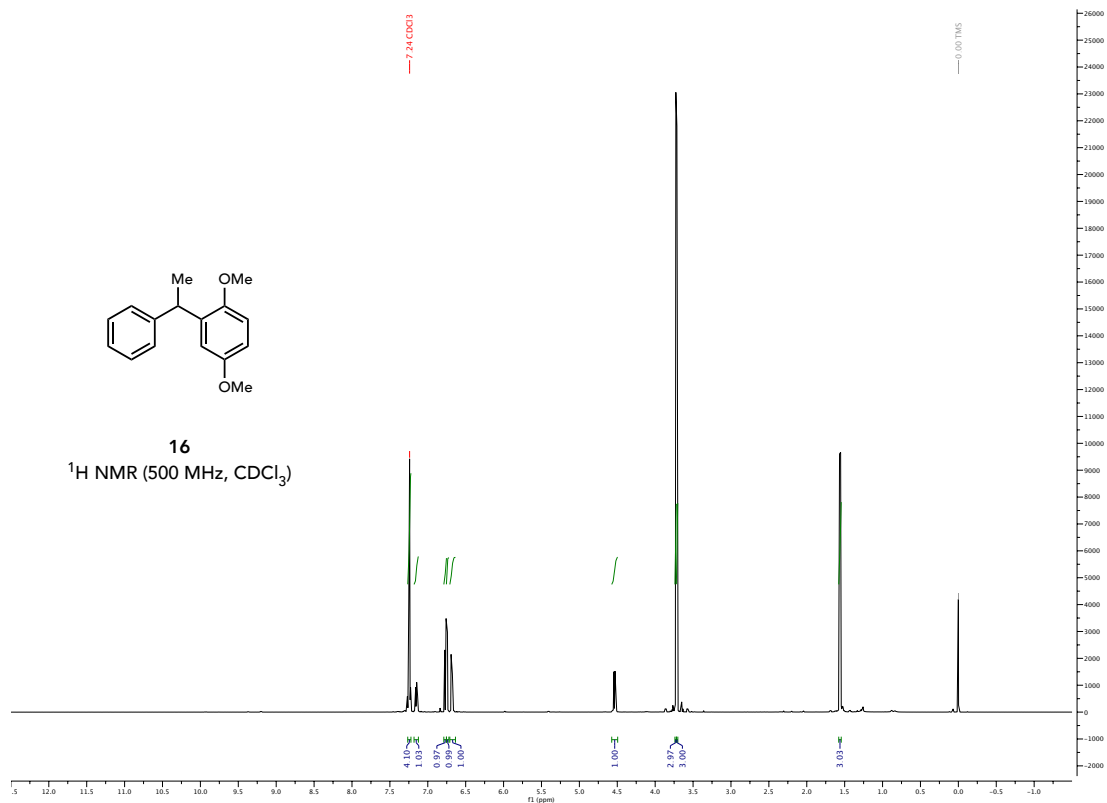

Figure S41. 500 MHz <sup>1</sup>H NMR spectrum of **16** in CDCl<sub>3</sub>.

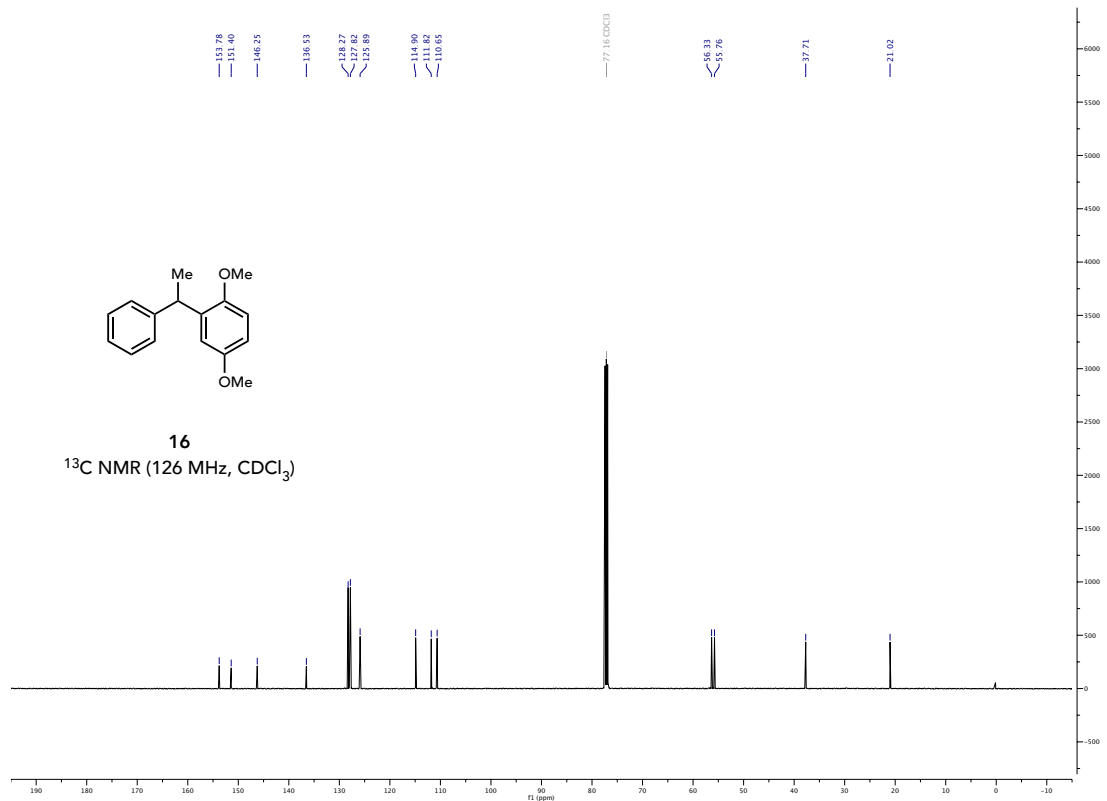

Figure S42. 126 MHz <sup>13</sup>C NMR spectrum of **16** in CDCl<sub>3</sub>.





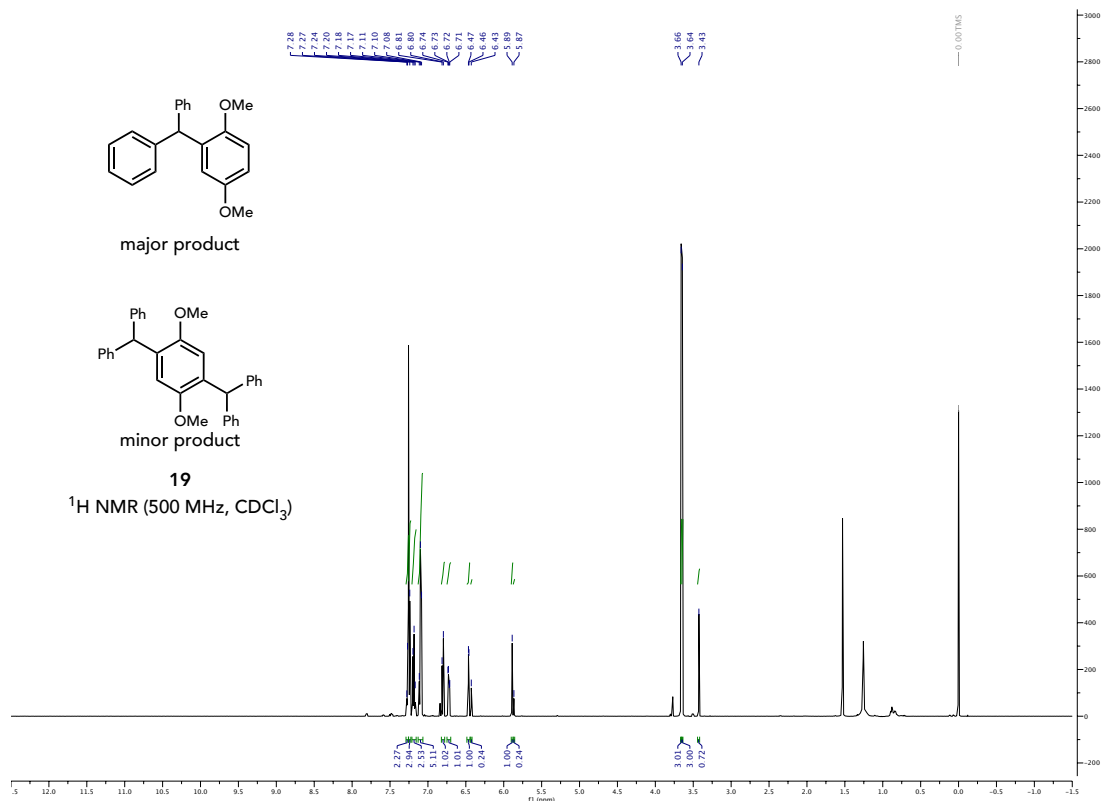

Figure S47. 500 MHz  $^1\text{H NMR}$  spectrum of **19** in  $\text{CDCl}_3$ .

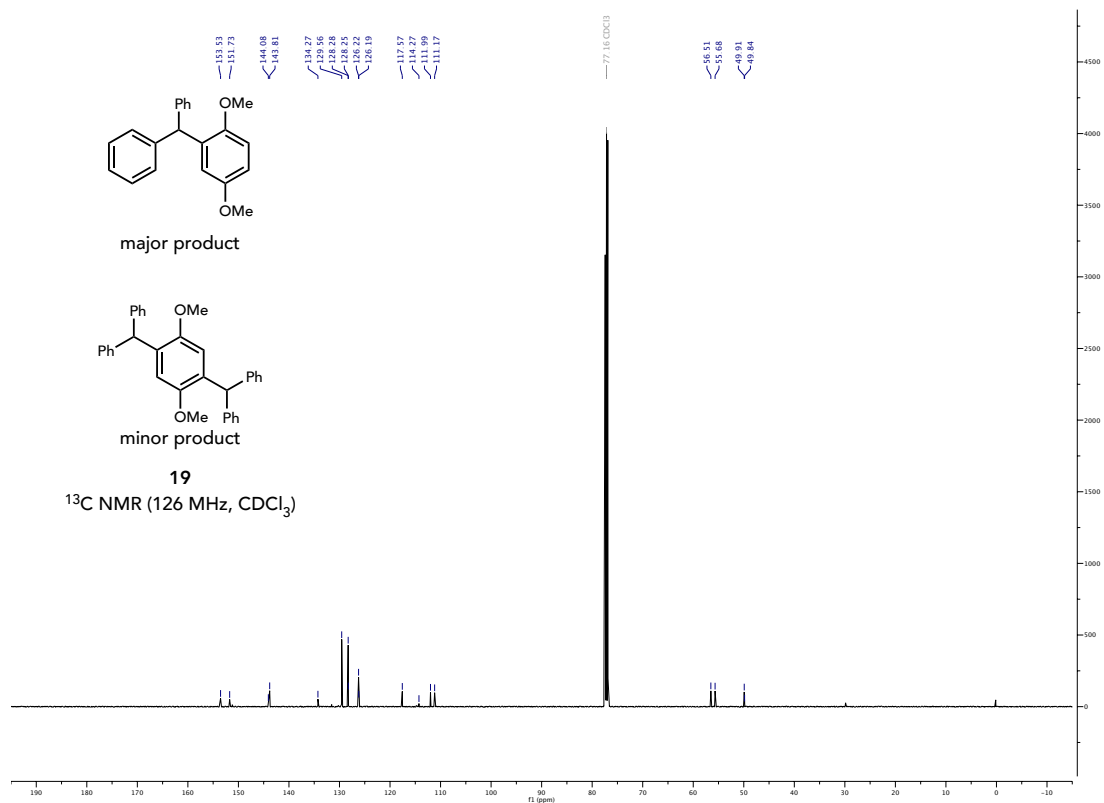

Figure S48. 126 MHz  $^{13}\text{C NMR}$  spectrum of **19** in  $\text{CDCl}_3$ .





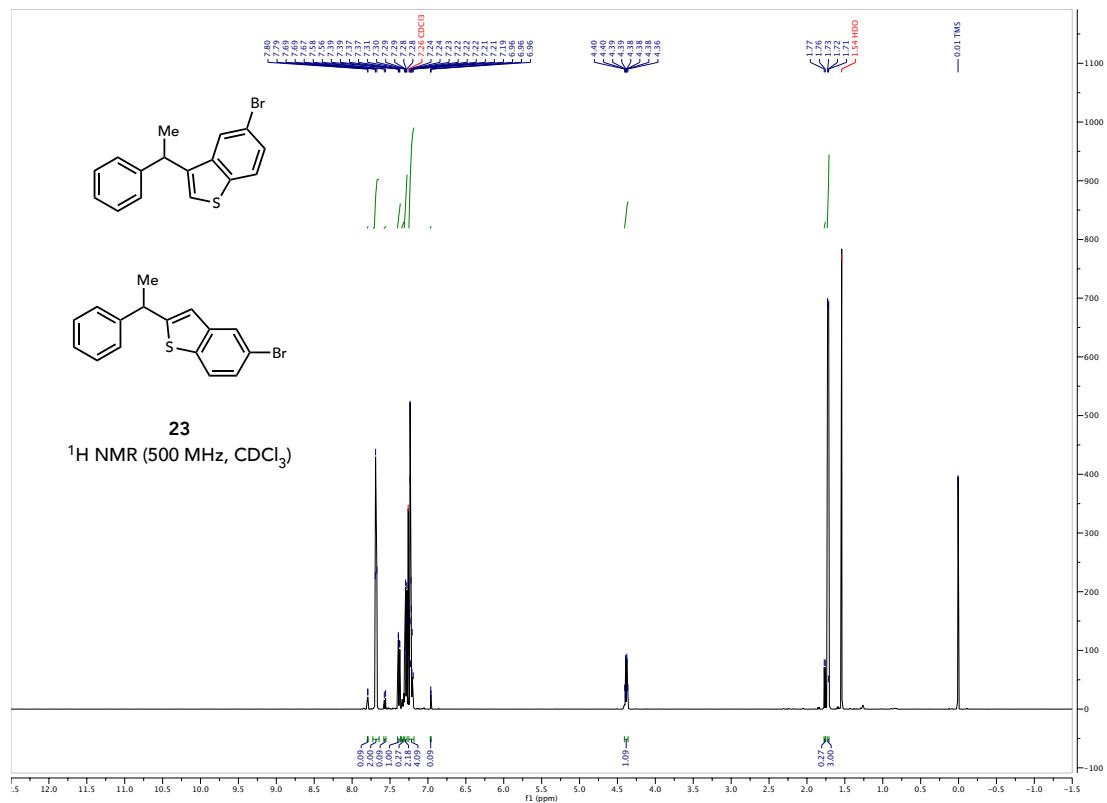

Figure S53. 500 MHz  $^1\text{H NMR}$  spectrum of **23** in  $\text{CDCl}_3$ .

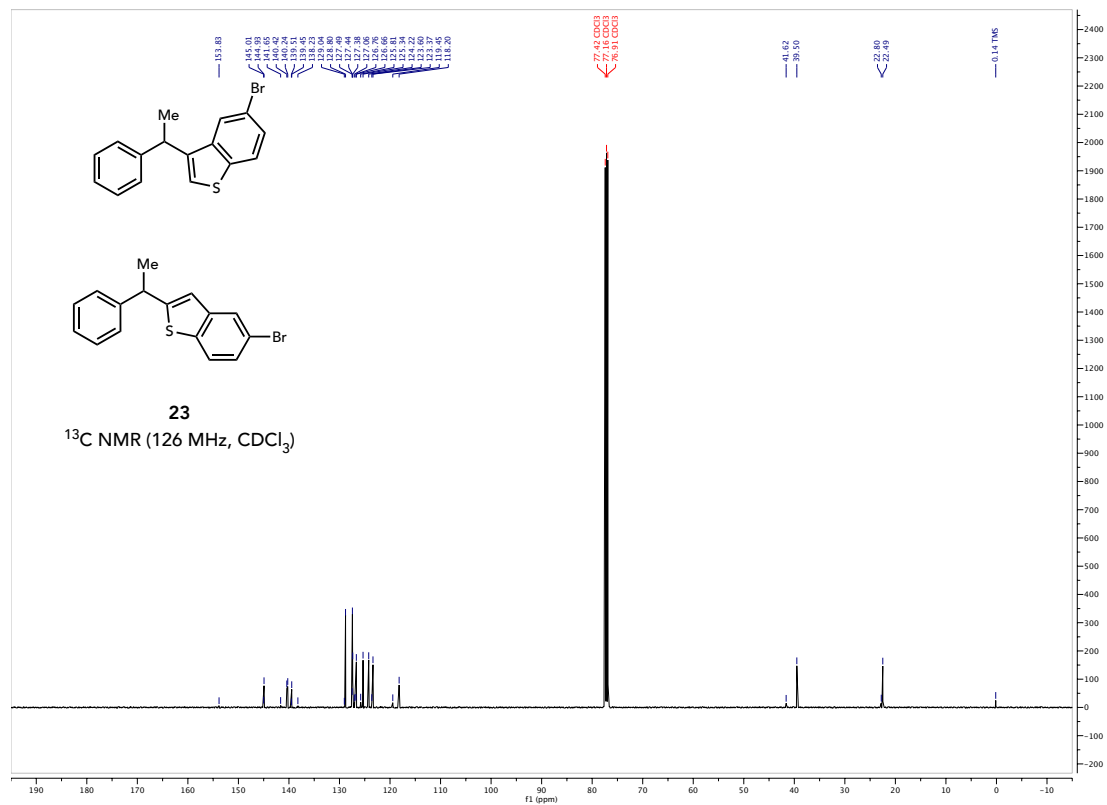

Figure S54. 126 MHz  $^{13}\text{C NMR}$  spectrum of **23** in  $\text{CDCl}_3$ .





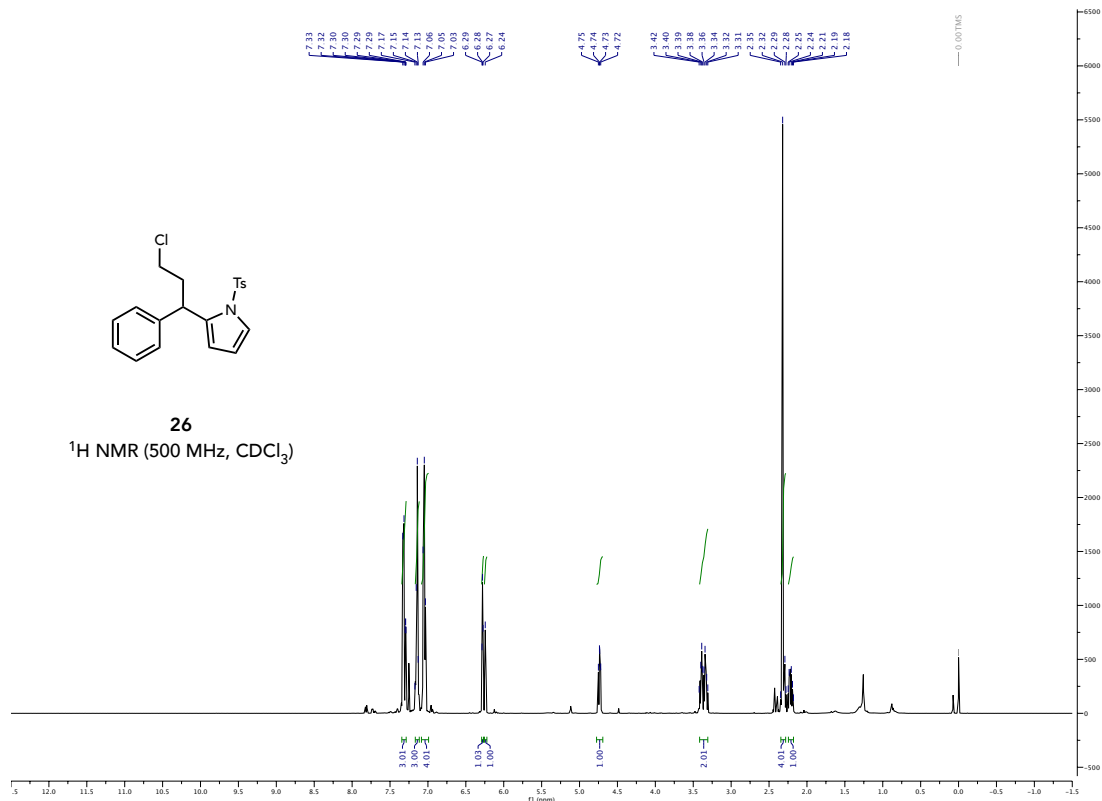

Figure S57. 500 MHz  $^1\text{H NMR}$  spectrum of **26** in  $\text{CDCl}_3$ .

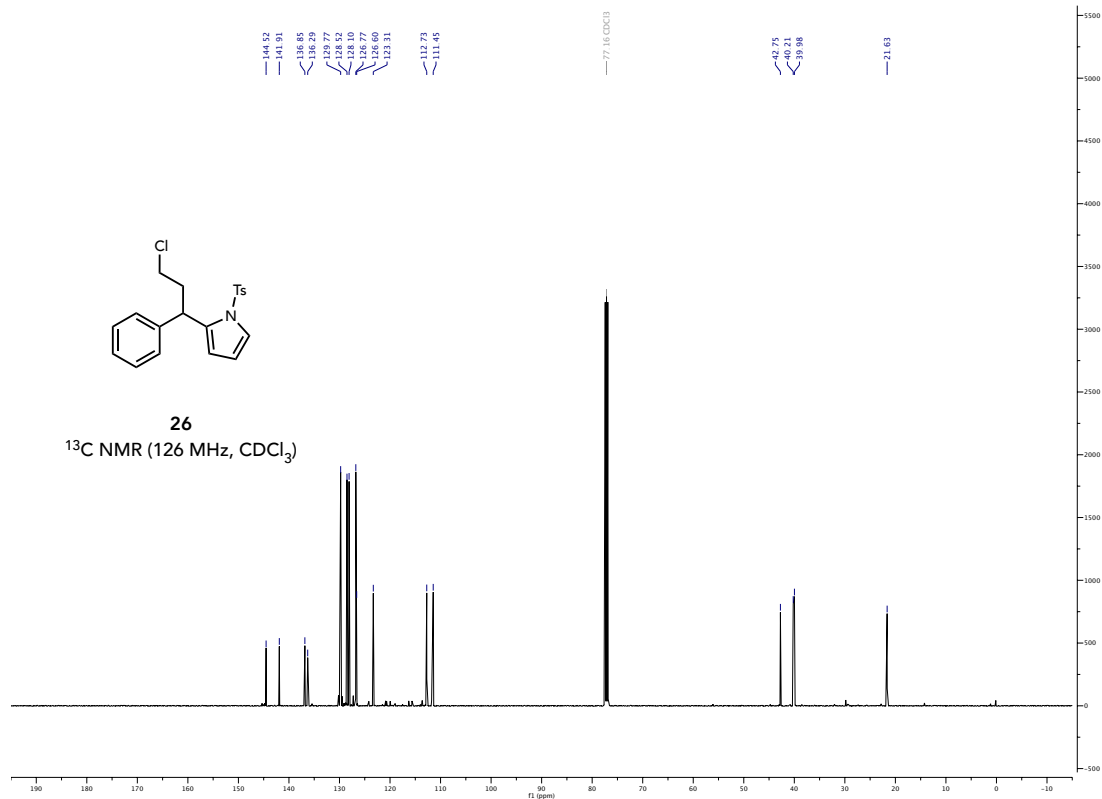

Figure S58. 126 MHz  $^{13}\text{C NMR}$  spectrum of **26** in  $\text{CDCl}_3$ .

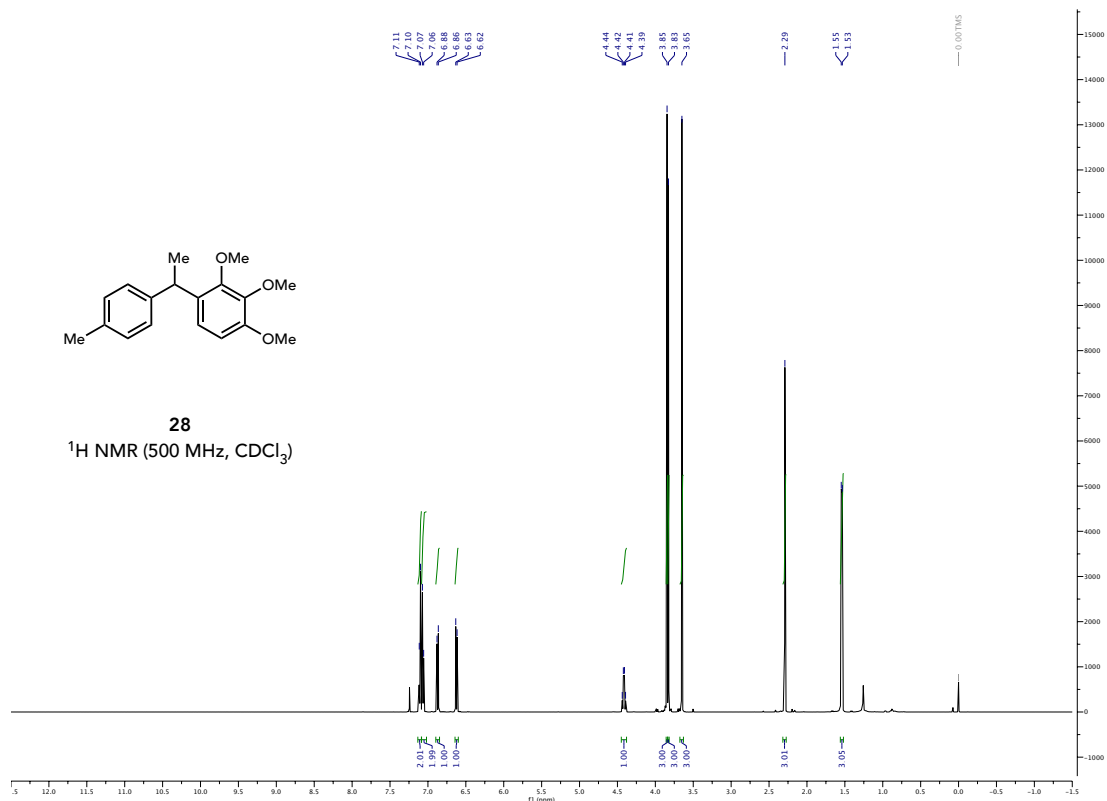

Figure S59. 500 MHz <sup>1</sup>H NMR spectrum of **28** in CDCl<sub>3</sub>.

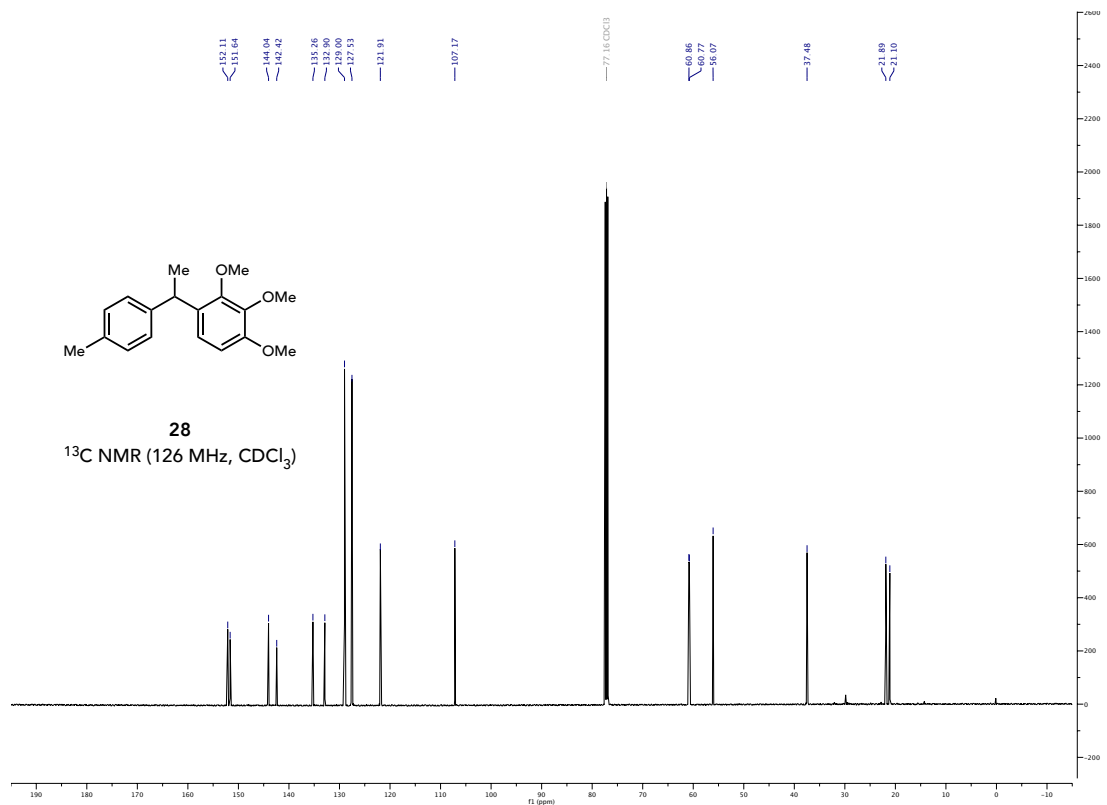

Figure S60. 126 MHz <sup>13</sup>C NMR spectrum of **28** in CDCl<sub>3</sub>.



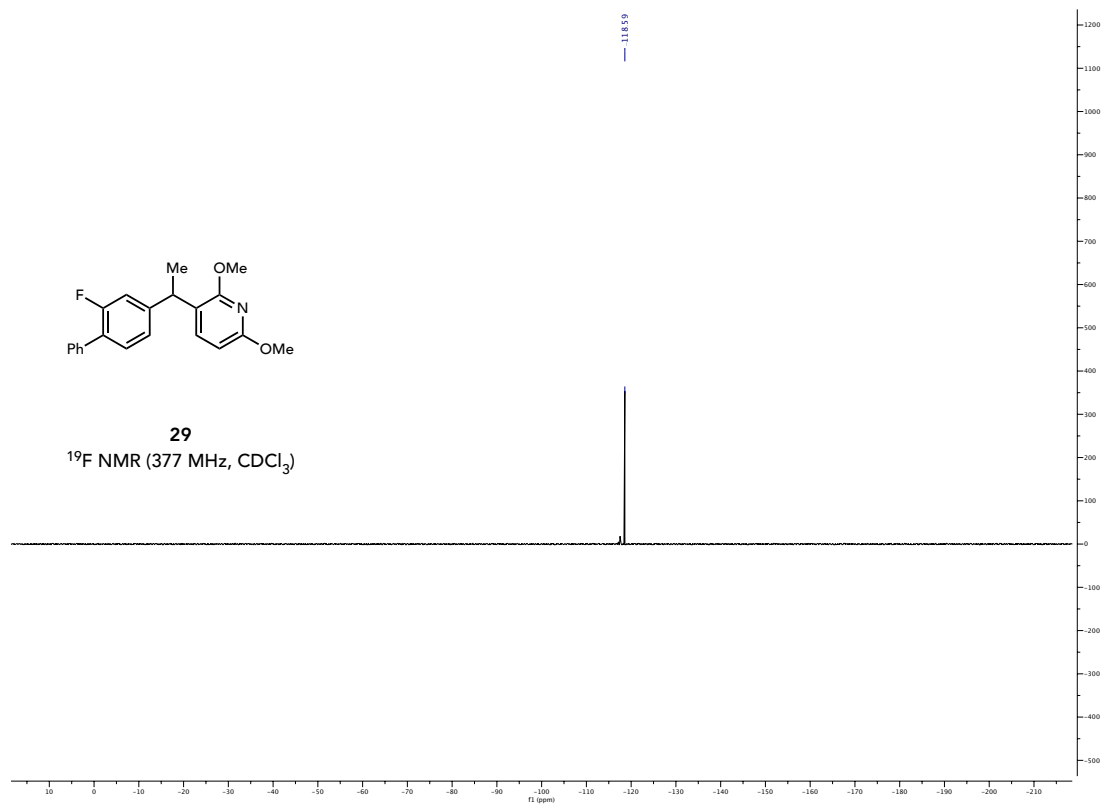

**Figure S63.** 377 MHz  $^{19}\text{F}$  NMR spectrum of **29** in  $\text{CDCl}_3$ .





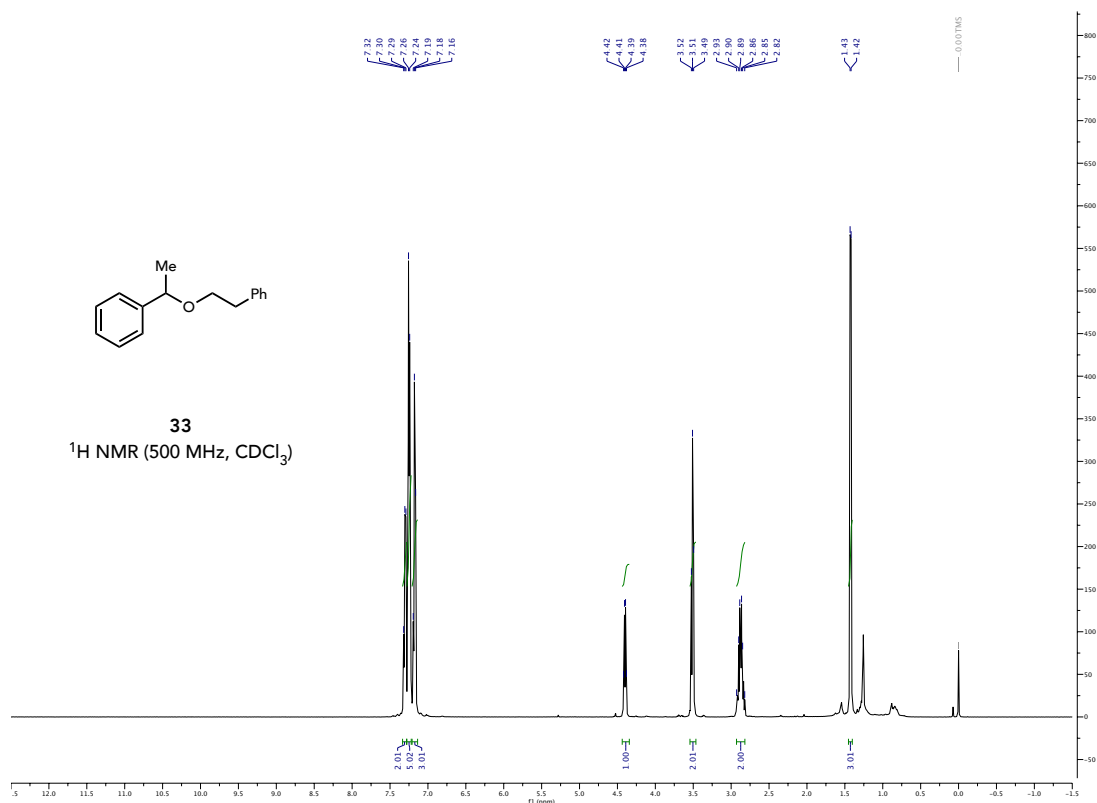

Figure S68. 500 MHz <sup>1</sup>H NMR spectrum of **33** in CDCl<sub>3</sub>.

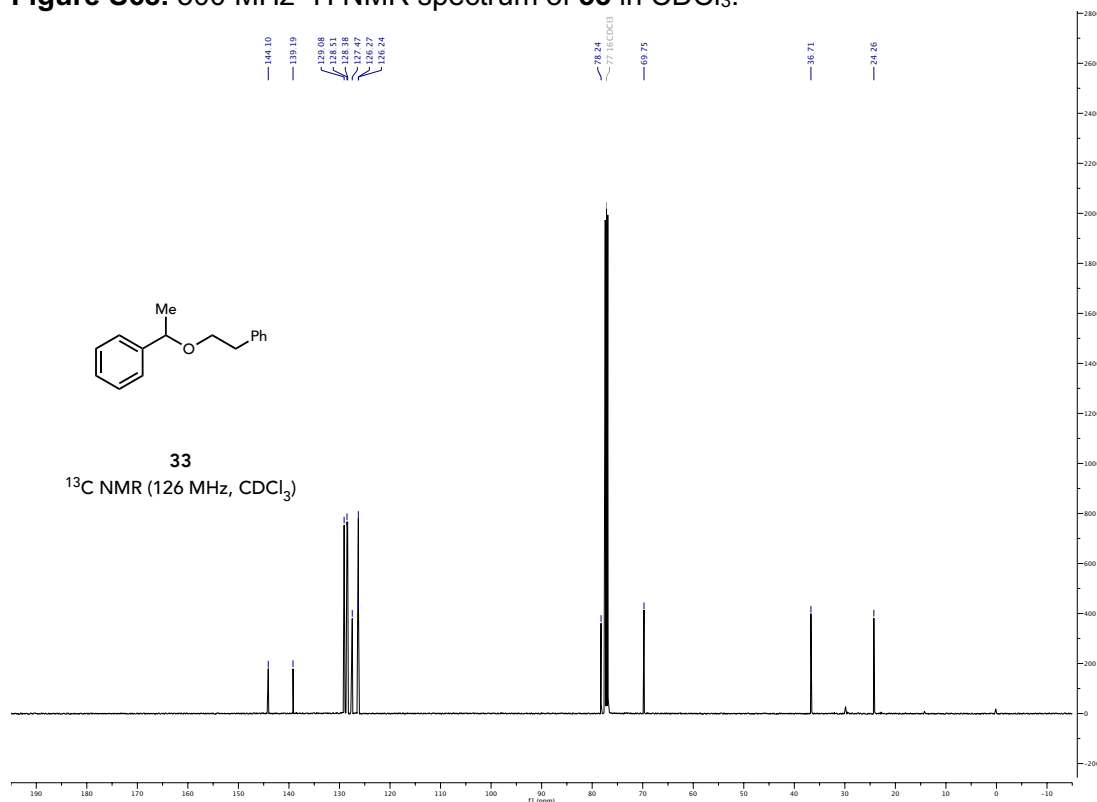

Figure S69. 126 MHz <sup>13</sup>C NMR spectrum of **33** in CDCl<sub>3</sub>.



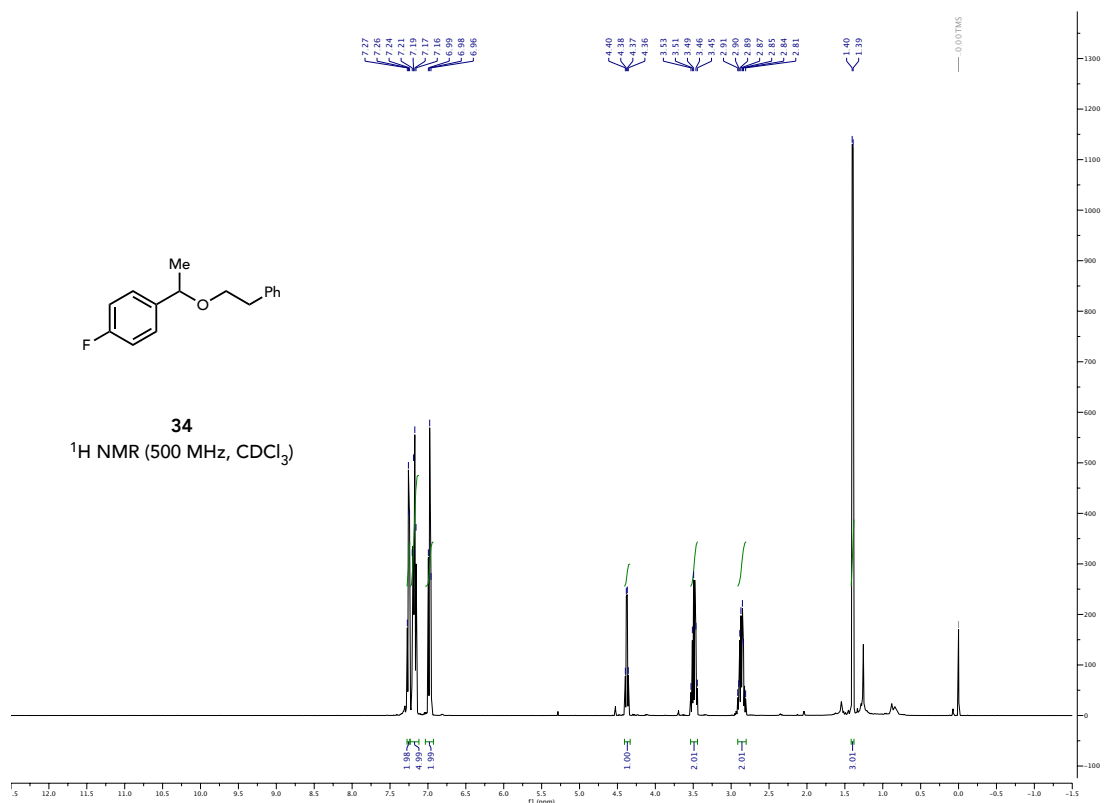

Figure S70. 500 MHz <sup>1</sup>H NMR spectrum of **34** in CDCl<sub>3</sub>.

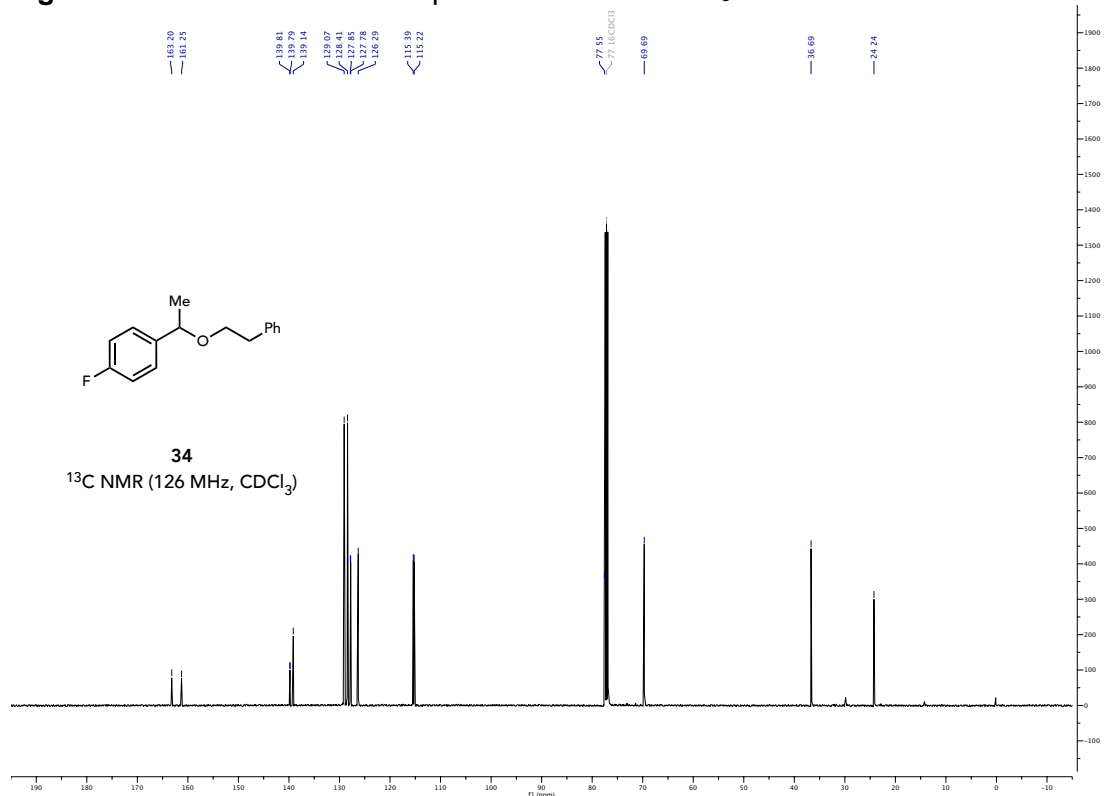

Figure S71. 126 MHz <sup>13</sup>C NMR spectrum of **34** in CDCl<sub>3</sub>.

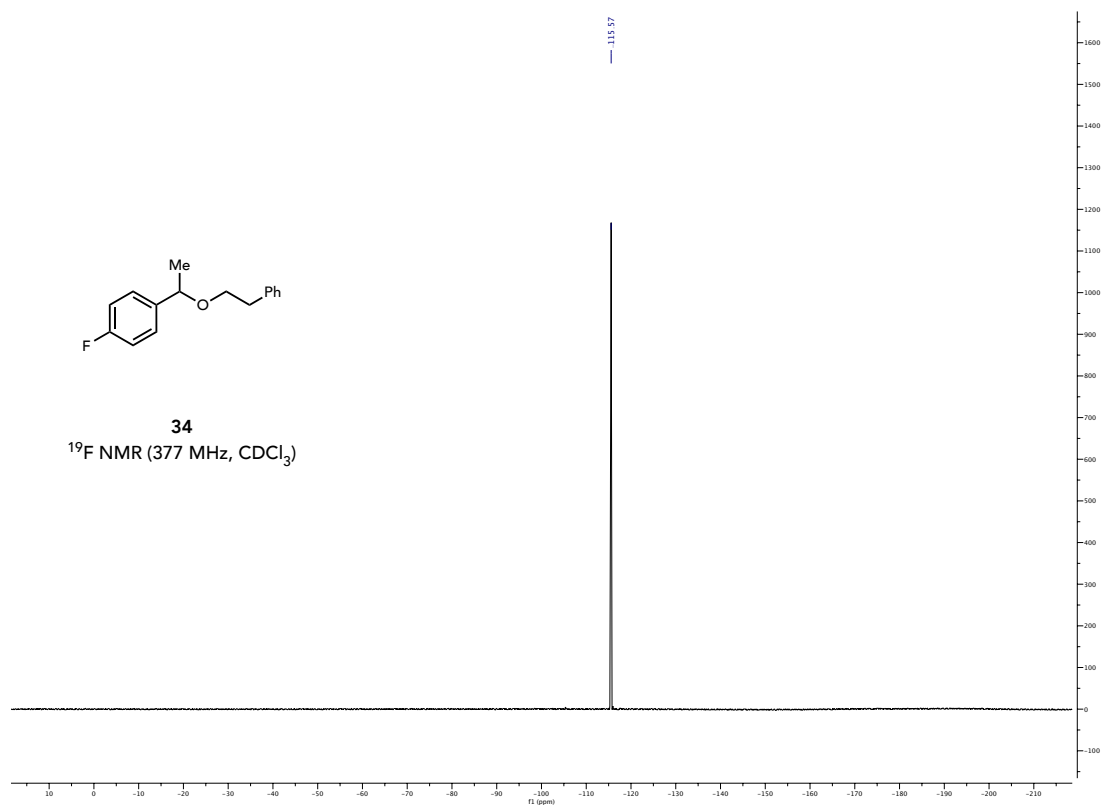

**Figure S72.** 377 MHz  $^{19}\text{F}$  NMR spectrum of **34** in  $\text{CDCl}_3$ .

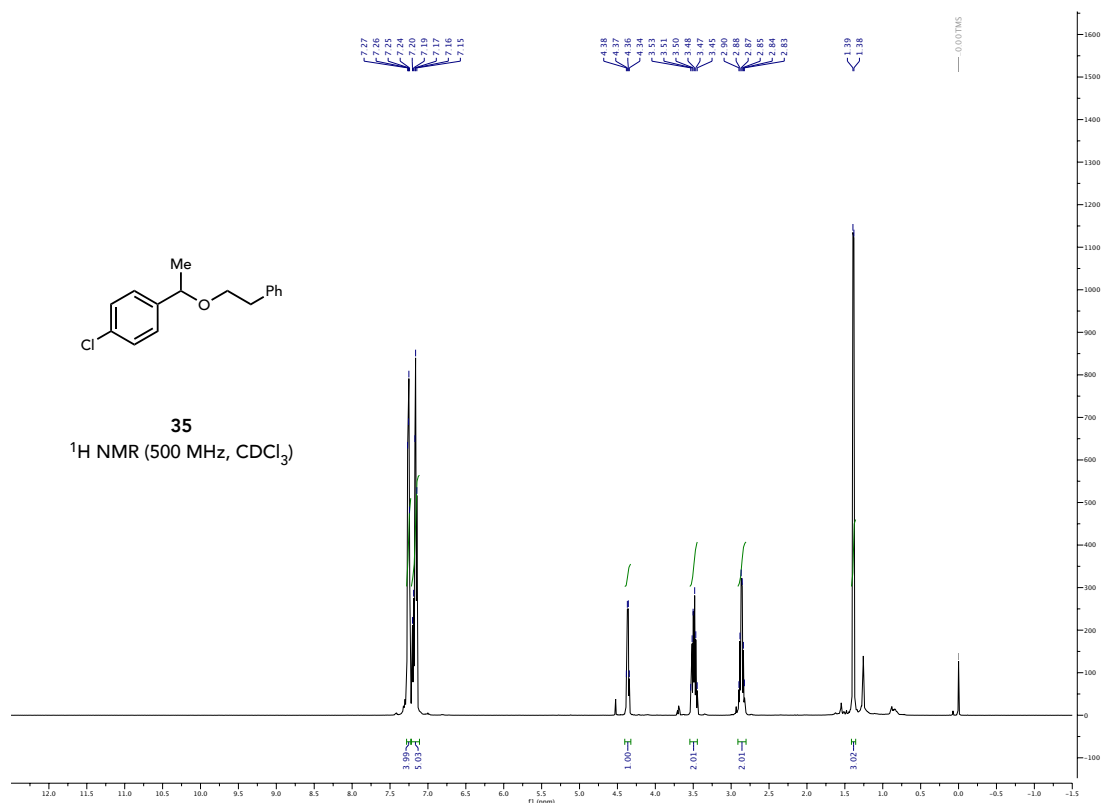

Figure S73. 500 MHz <sup>1</sup>H NMR spectrum of **35** in CDCl<sub>3</sub>.

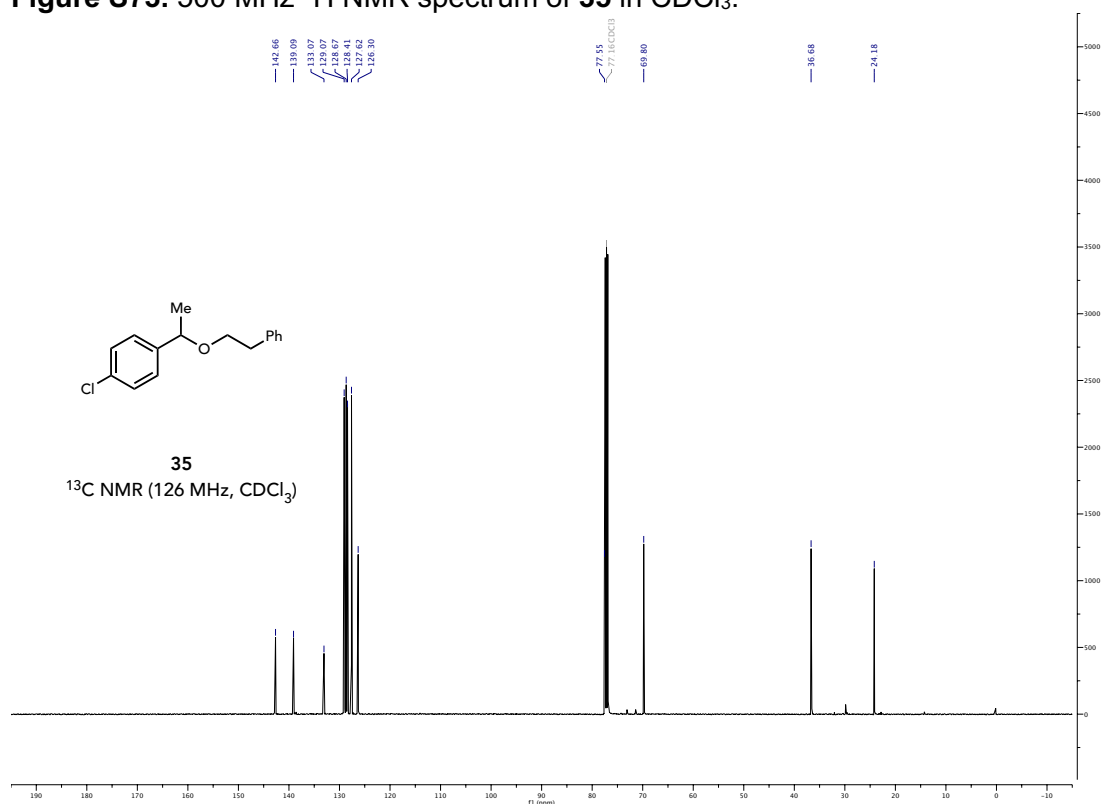

Figure S74. 126 MHz <sup>13</sup>C NMR spectrum of **35** in CDCl<sub>3</sub>.



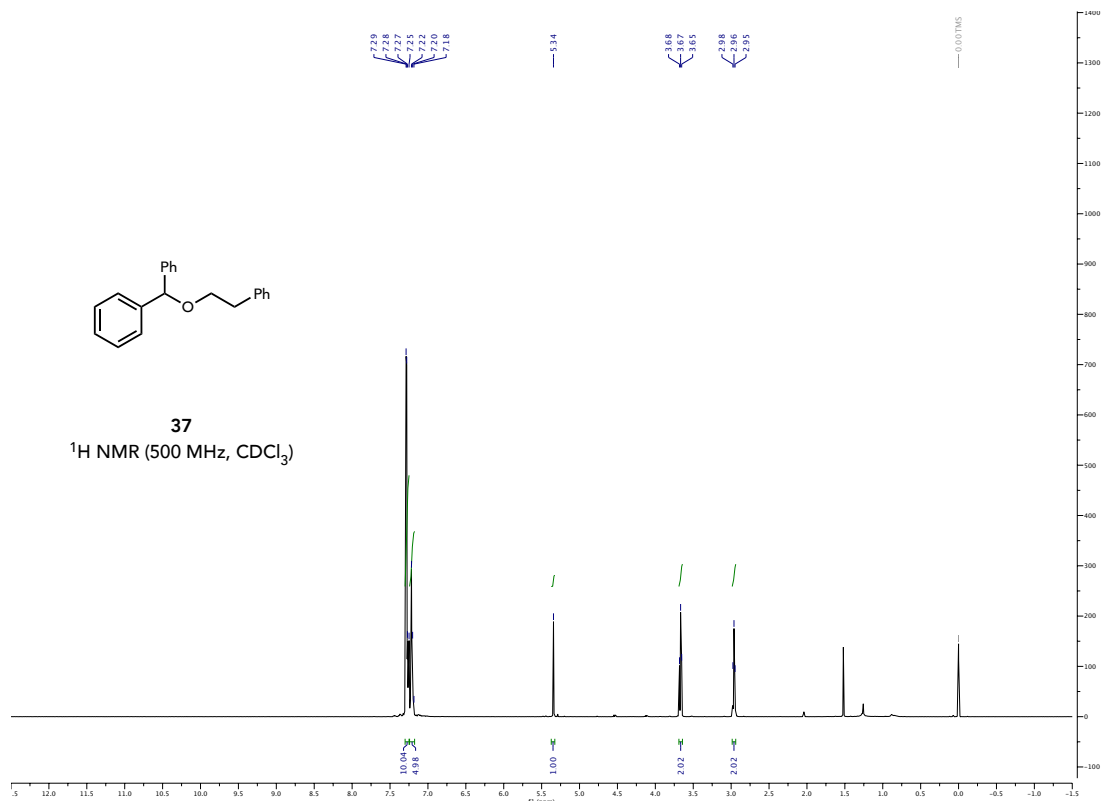

Figure S77. 500 MHz <sup>1</sup>H NMR spectrum of **37** in CDCl<sub>3</sub>.

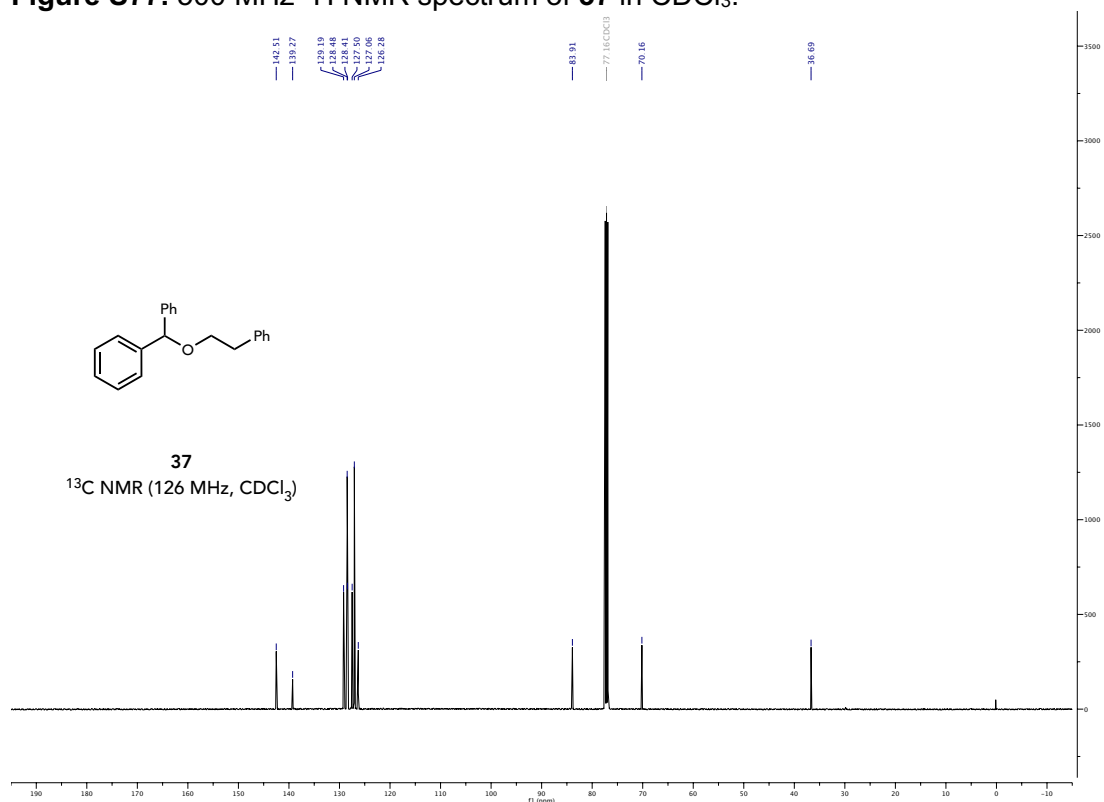

Figure S78. 126 MHz <sup>13</sup>C NMR spectrum of **37** in CDCl<sub>3</sub>.

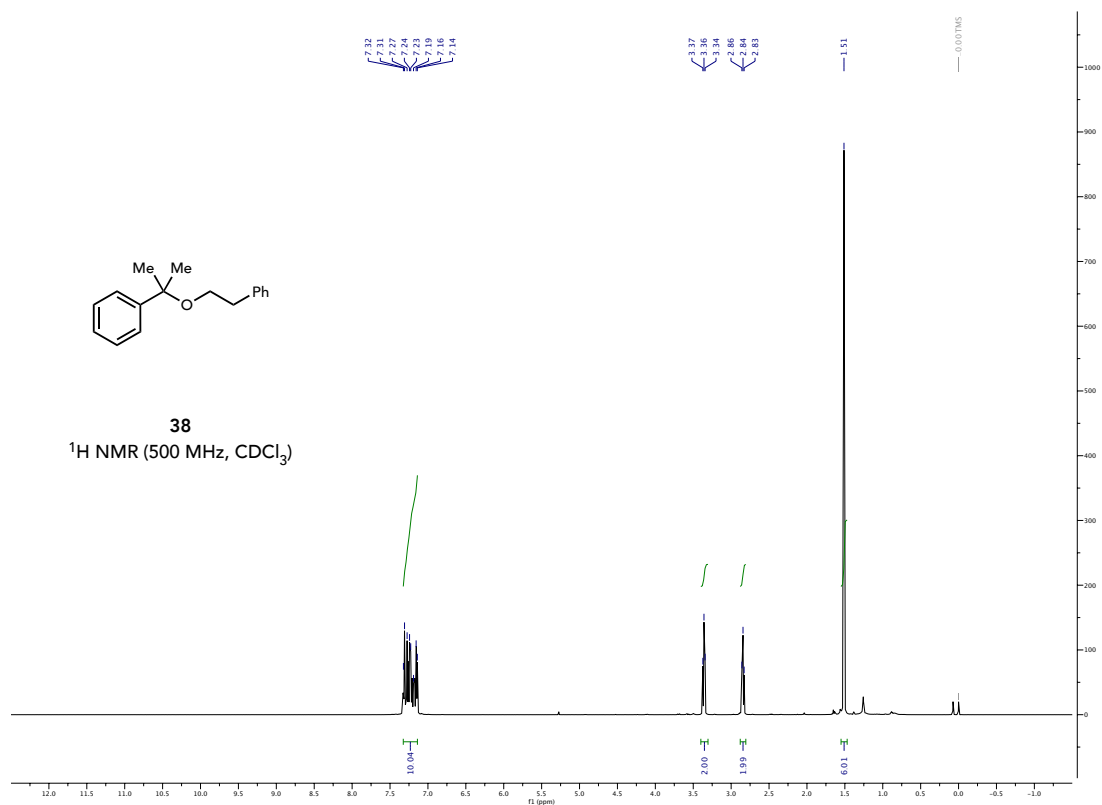

Figure S79. 500 MHz <sup>1</sup>H NMR spectrum of **38** in CDCl<sub>3</sub>.

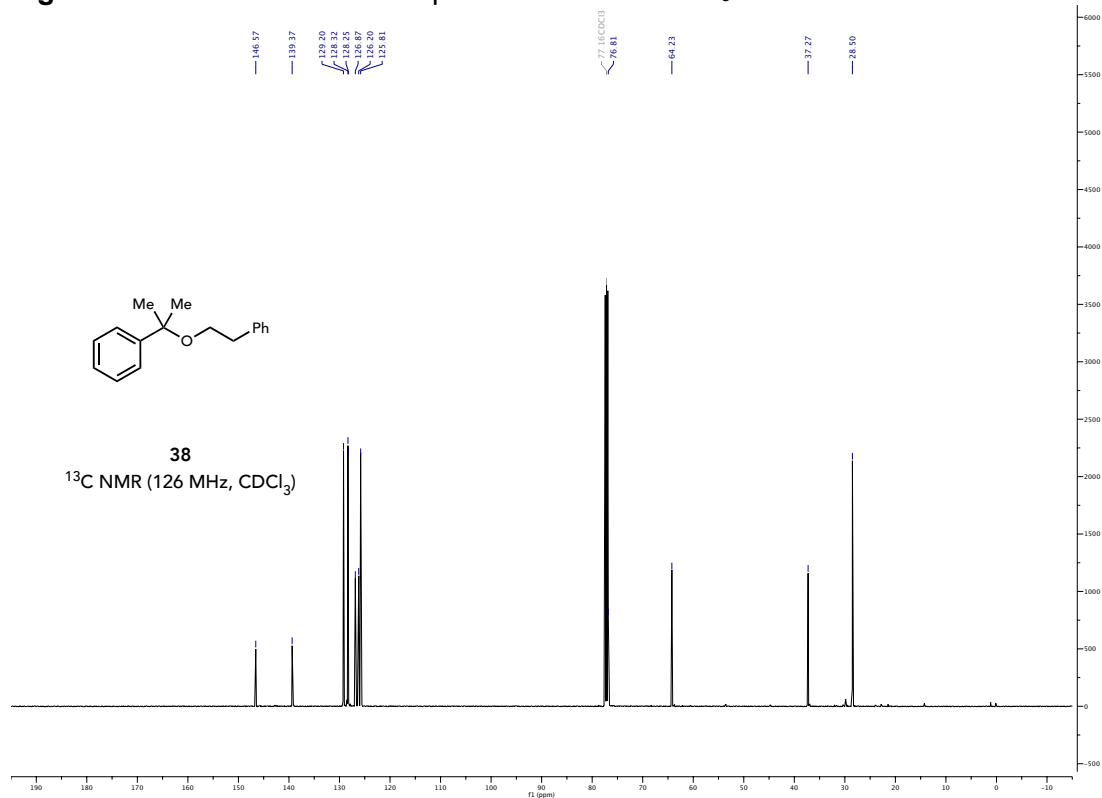

Figure S80. 126 MHz <sup>13</sup>C NMR spectrum of **38** in CDCl<sub>3</sub>.







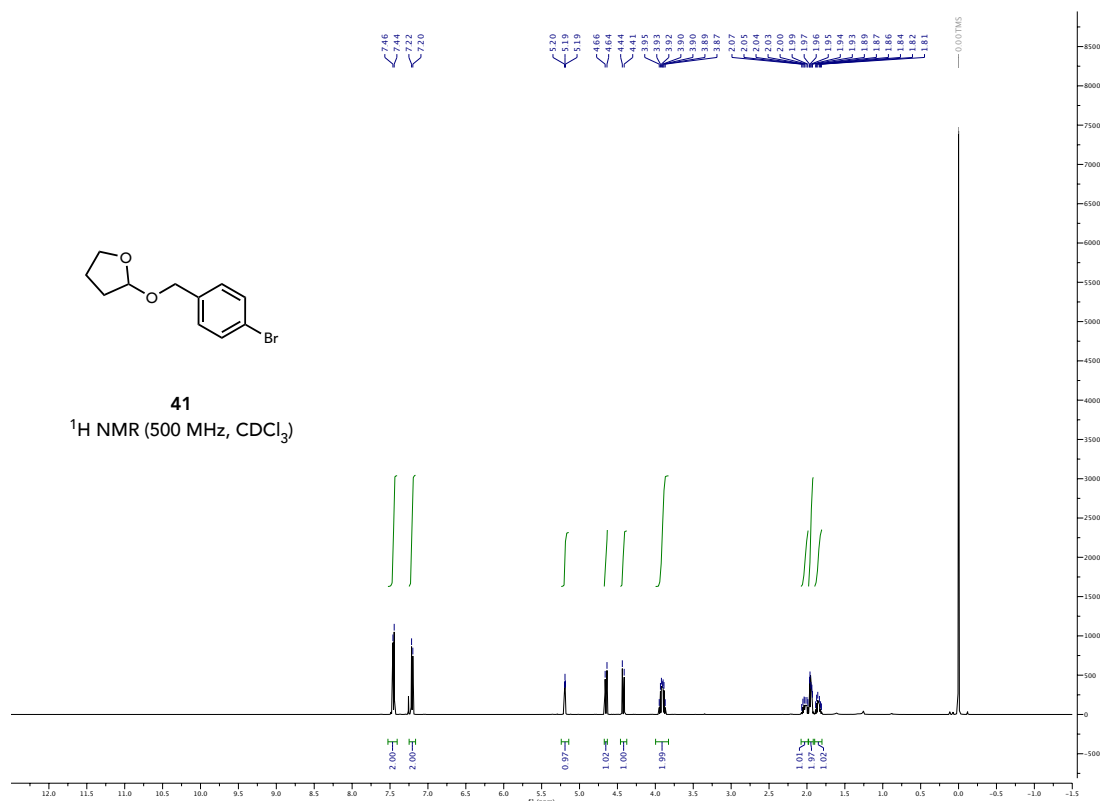

Figure S85. 500 MHz  $^1\text{H NMR}$  spectrum of **41** in  $\text{CDCl}_3$ .

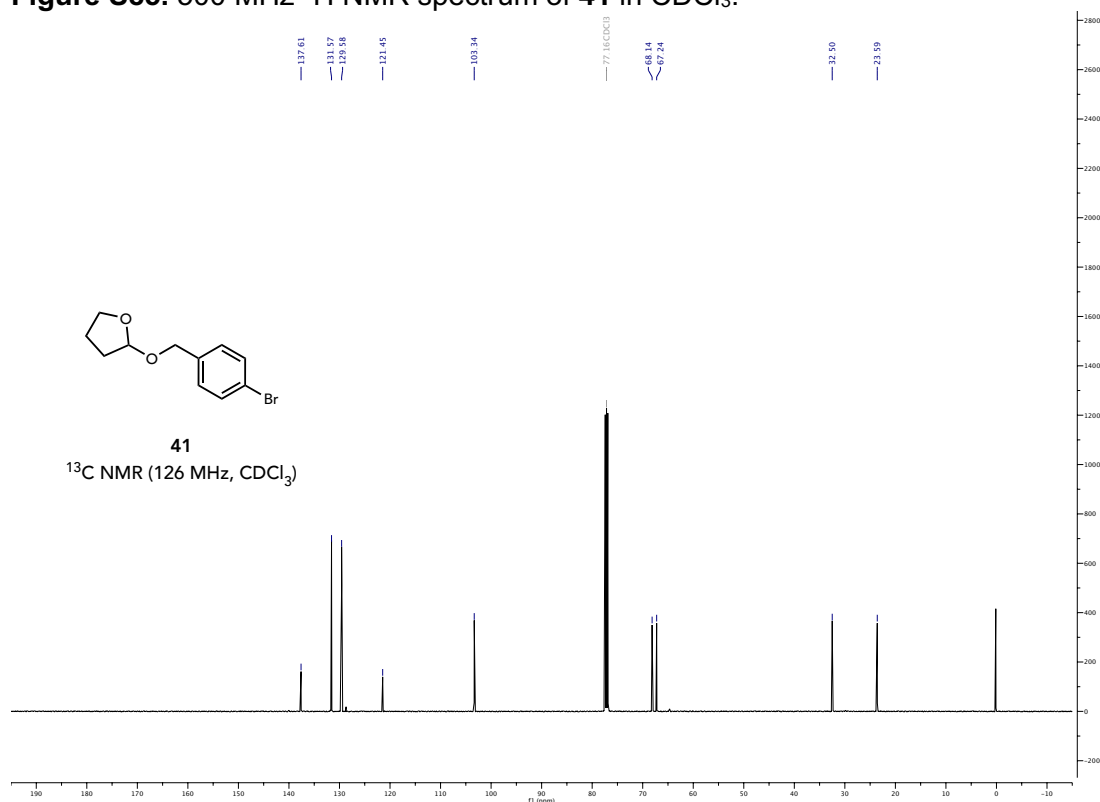

Figure S86. 126 MHz  $^{13}\text{C NMR}$  spectrum of **41** in  $\text{CDCl}_3$ .

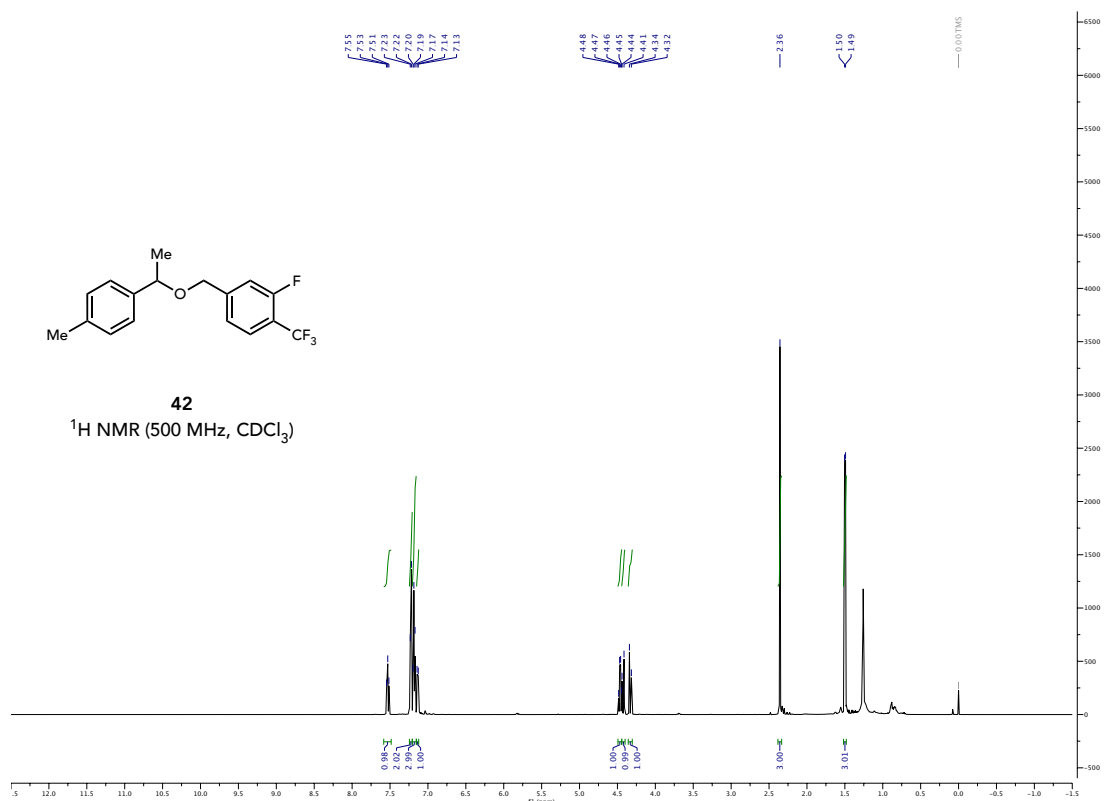

Figure S87. 500 MHz <sup>1</sup>H NMR spectrum of **42** in CDCl<sub>3</sub>.

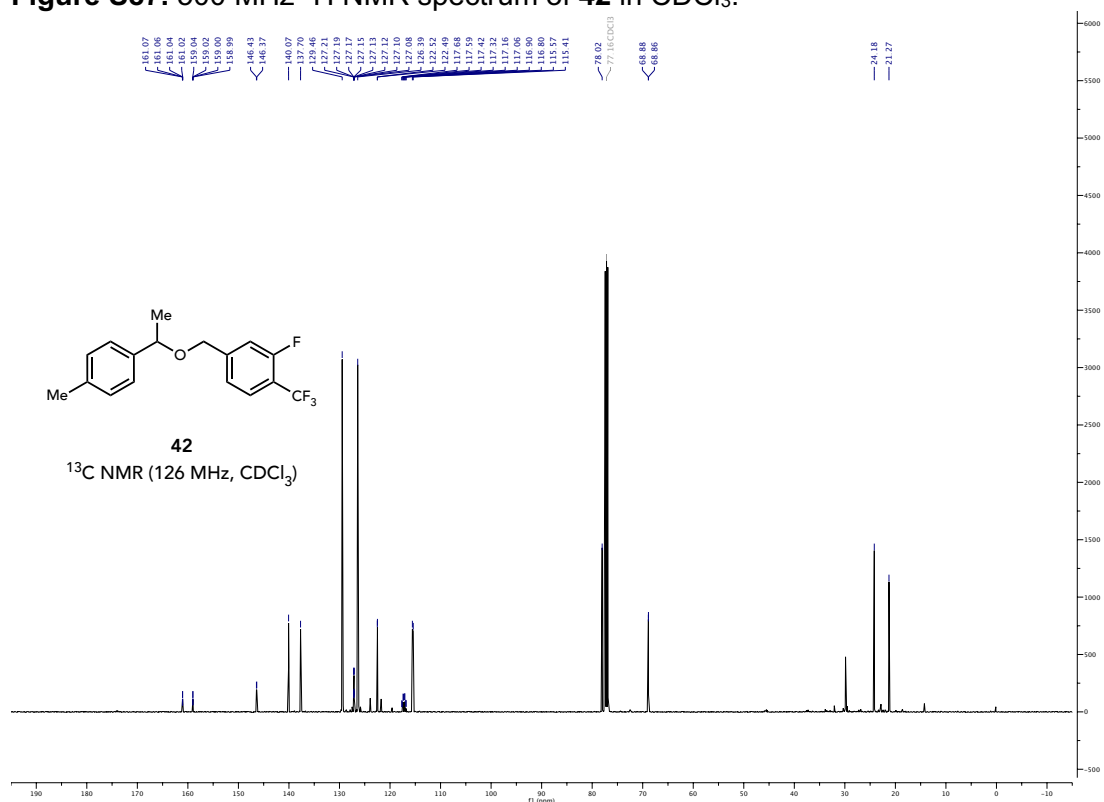

Figure S88. 126 MHz <sup>13</sup>C NMR spectrum of **42** in CDCl<sub>3</sub>.

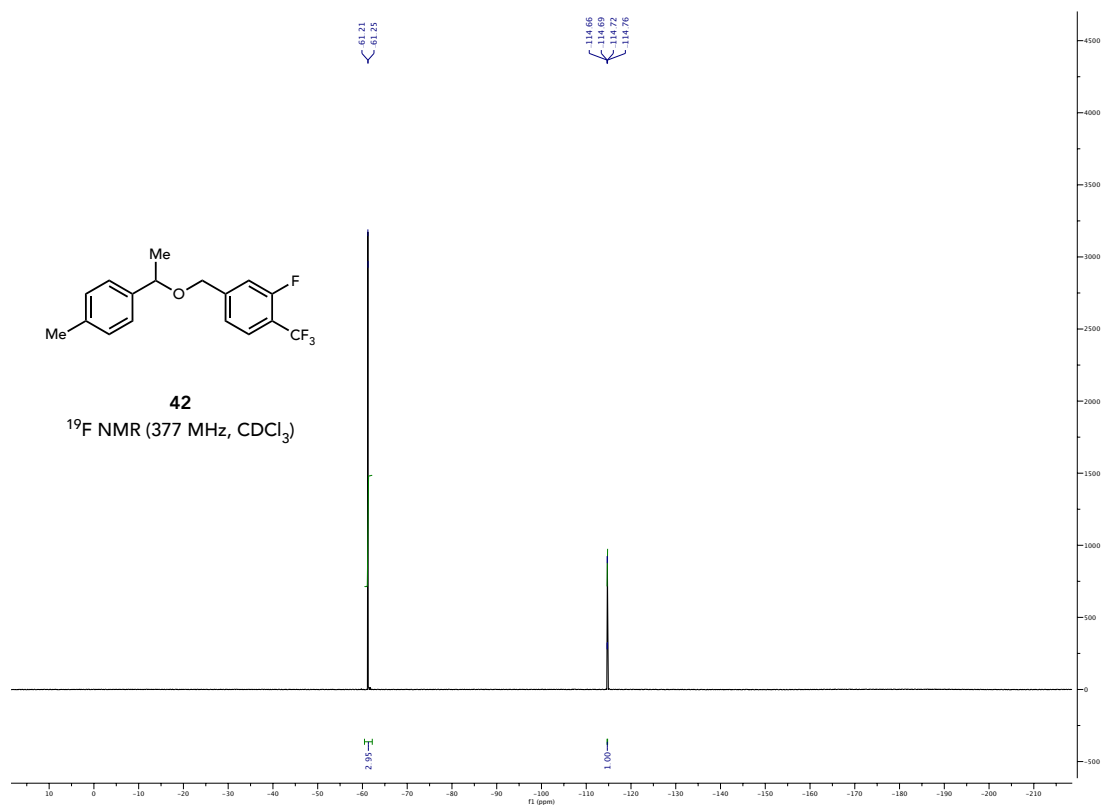

**Figure S89.** 377 MHz  $^{19}\text{F}$  NMR spectrum of **42** in  $\text{CDCl}_3$ .

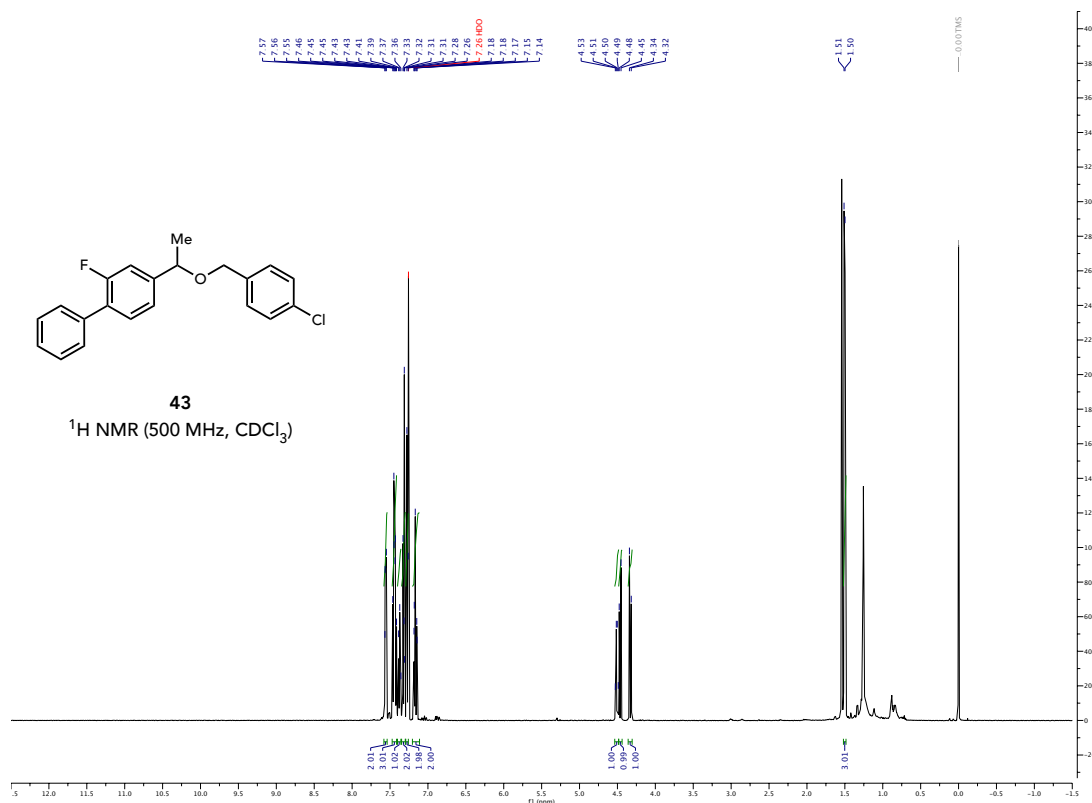

**Figure S90.** 500 MHz  $^1\text{H NMR}$  spectrum of **43** in  $\text{CDCl}_3$ .

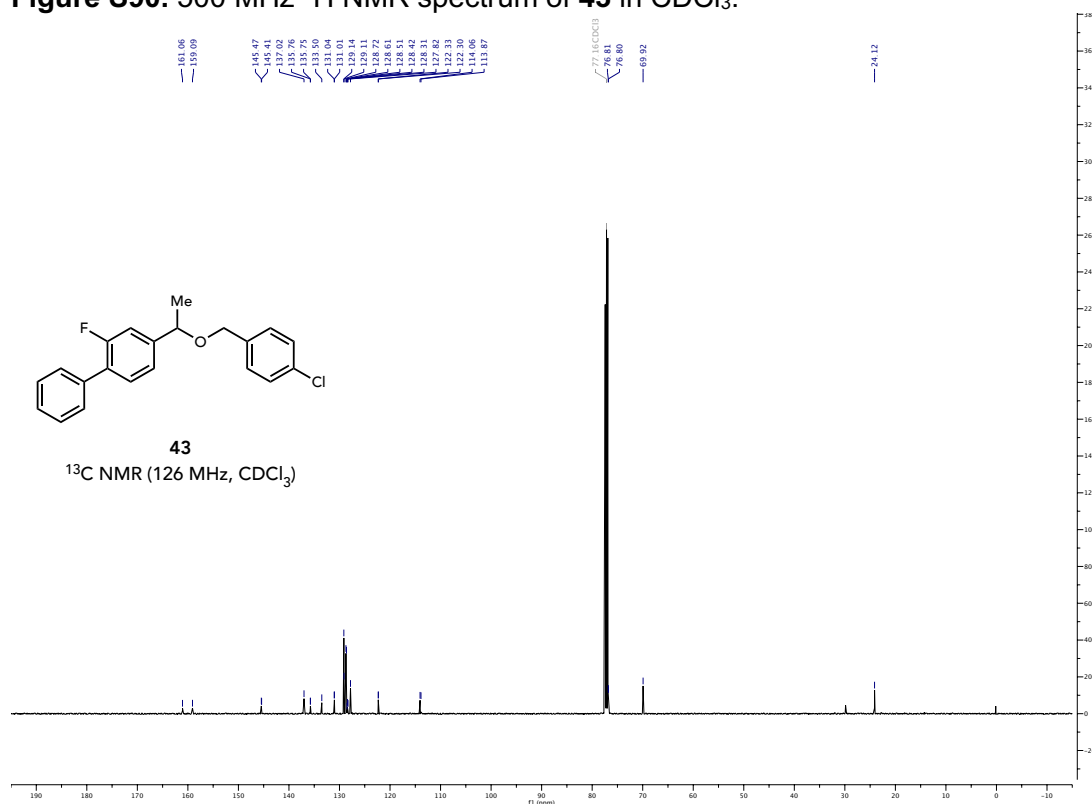

**Figure S91.** 126 MHz  $^{13}\text{C NMR}$  spectrum of **43** in  $\text{CDCl}_3$ .

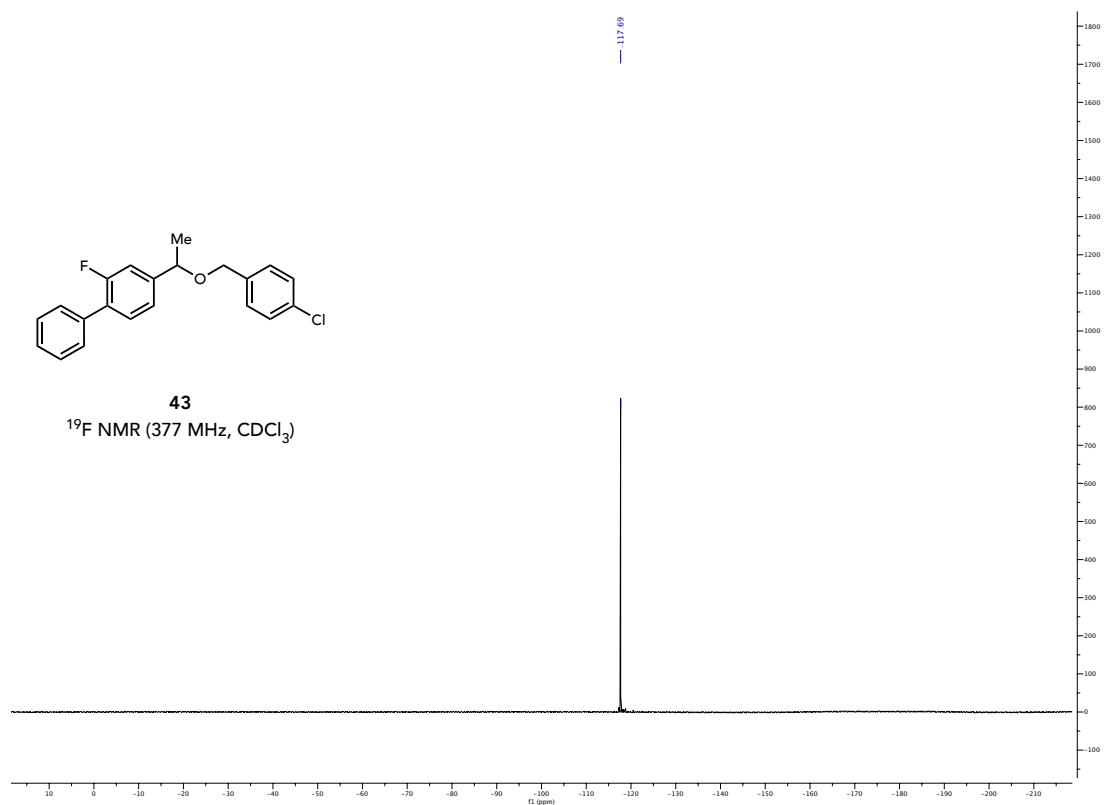

**Figure S92.** 377 MHz  $^{19}\text{F}$  NMR spectrum of **43** in  $\text{CDCl}_3$ .

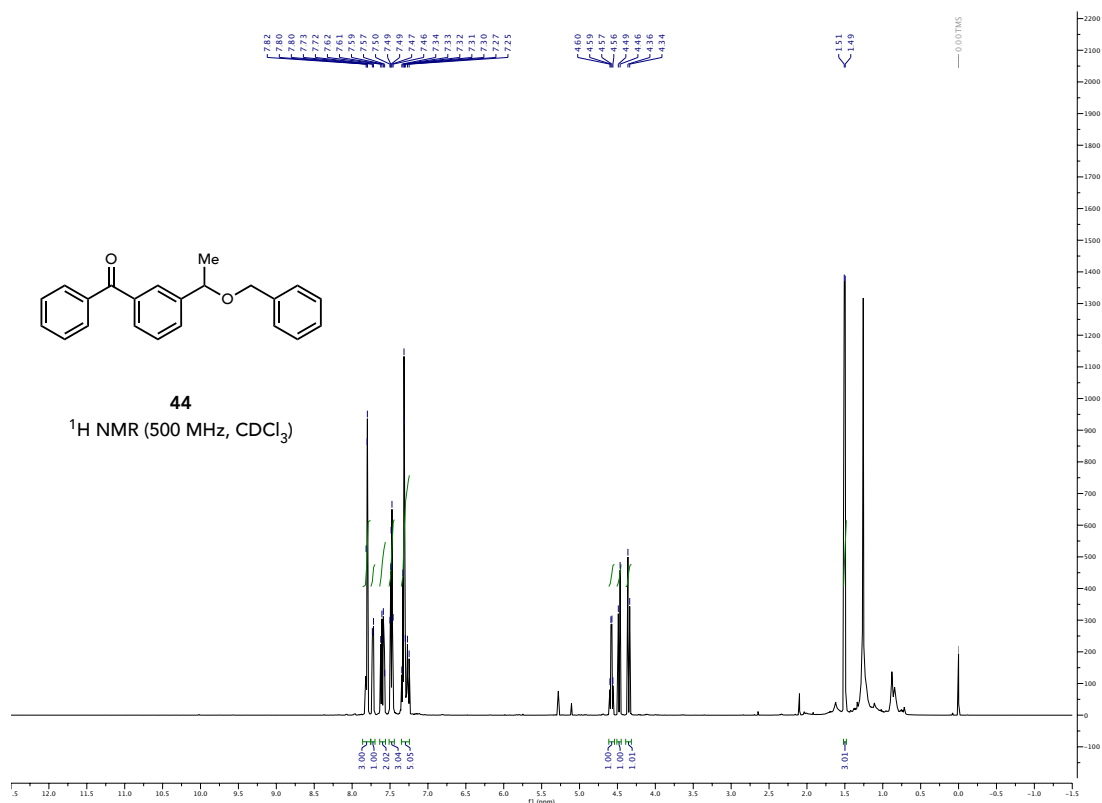

Figure S93. 500 MHz <sup>1</sup>H NMR spectrum of **44** in CDCl<sub>3</sub>.

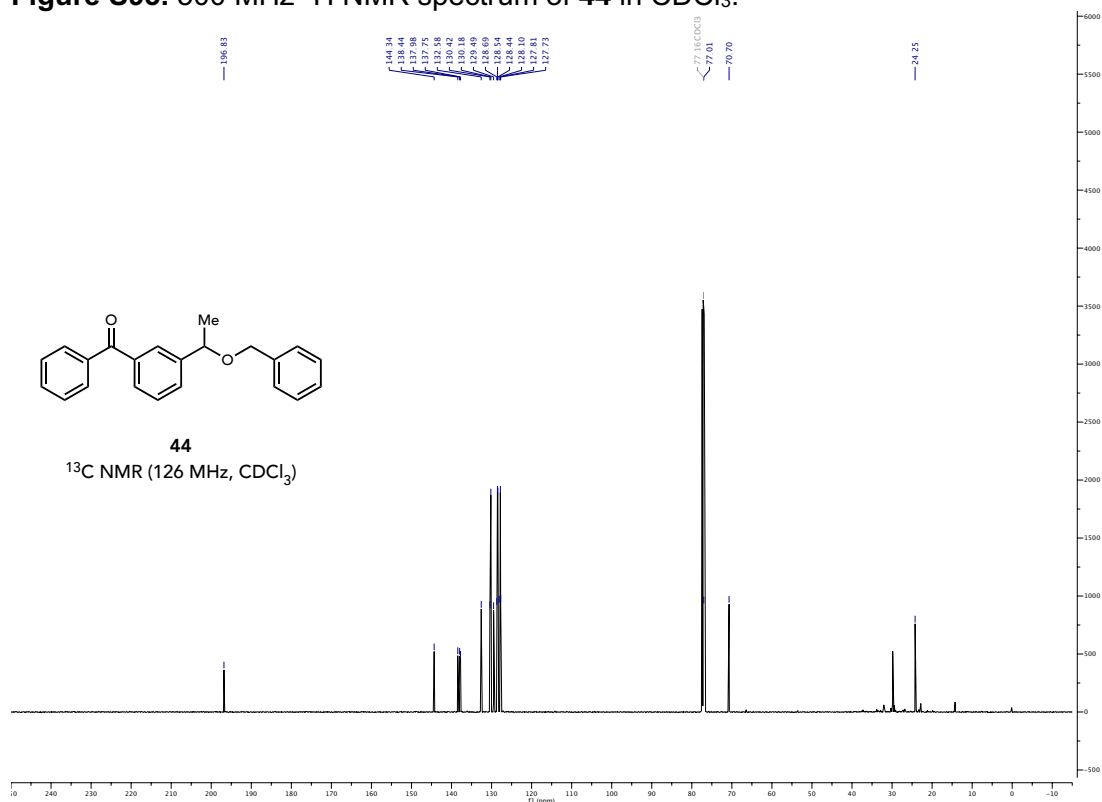

Figure S94. 126 MHz <sup>13</sup>C NMR spectrum of **44** in CDCl<sub>3</sub>.

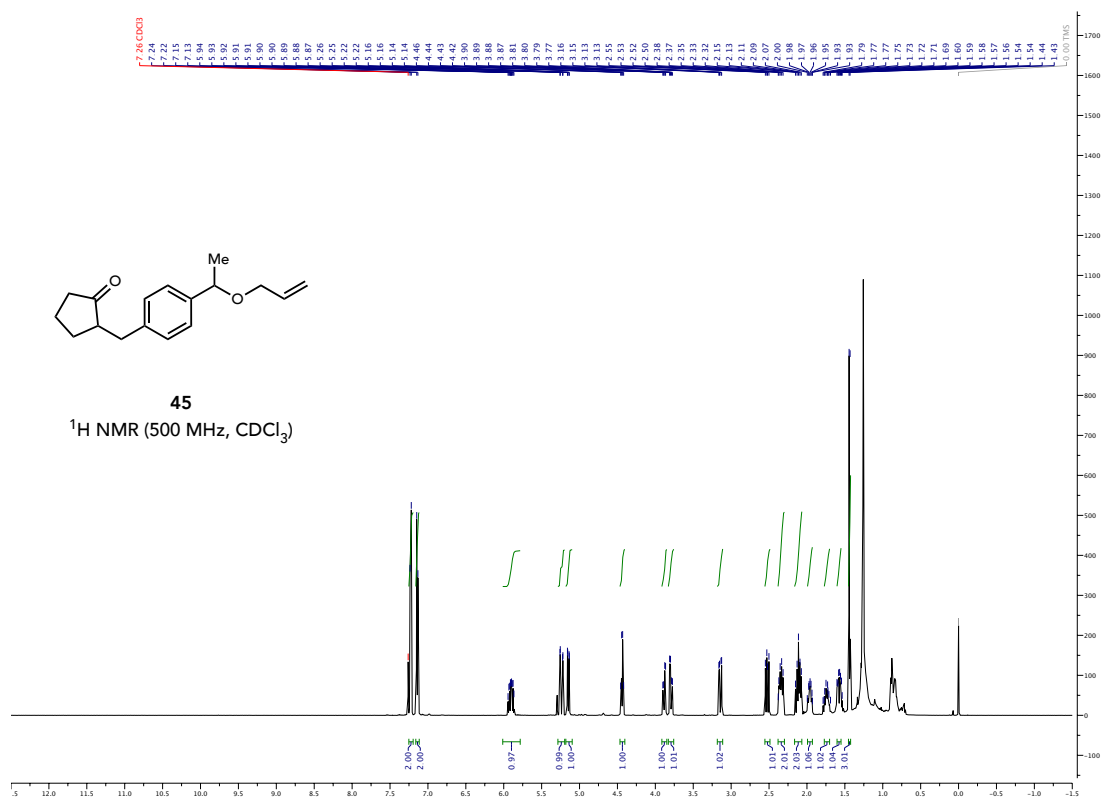

**Figure S95.** 500 MHz <sup>1</sup>H NMR spectrum of **45** in CDCl<sub>3</sub>.

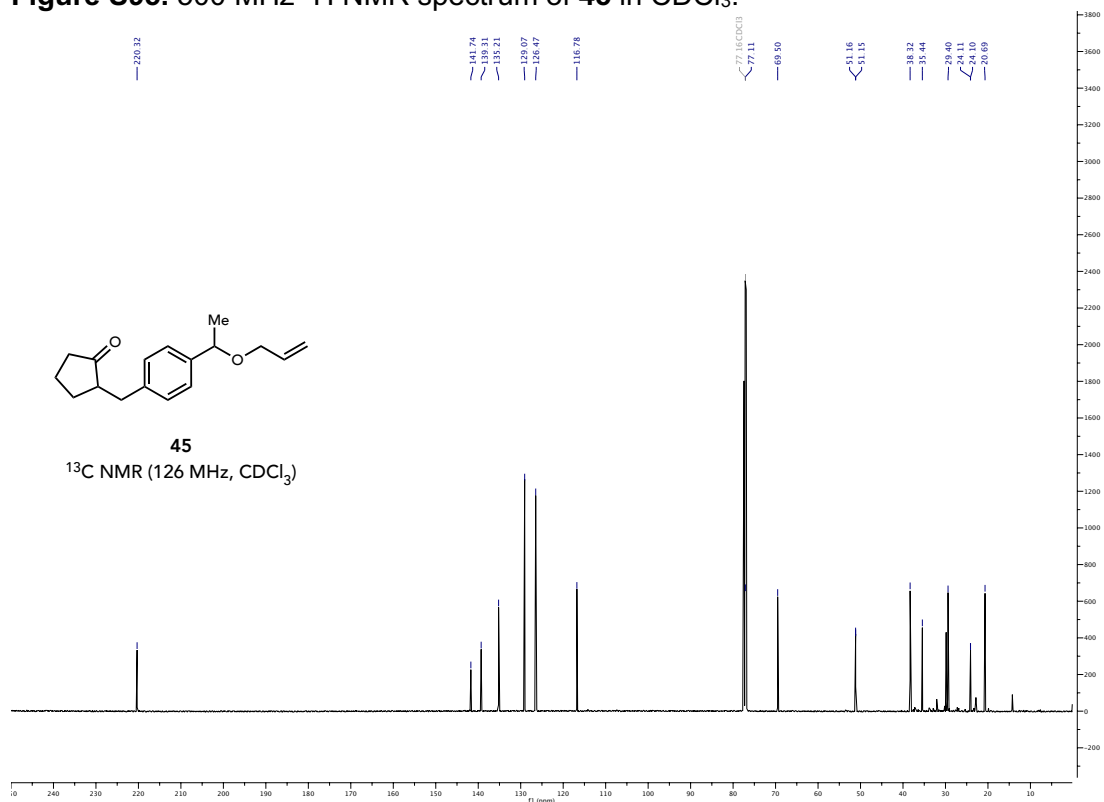

**Figure S96.** 126 MHz <sup>13</sup>C NMR spectrum of **45** in CDCl<sub>3</sub>.







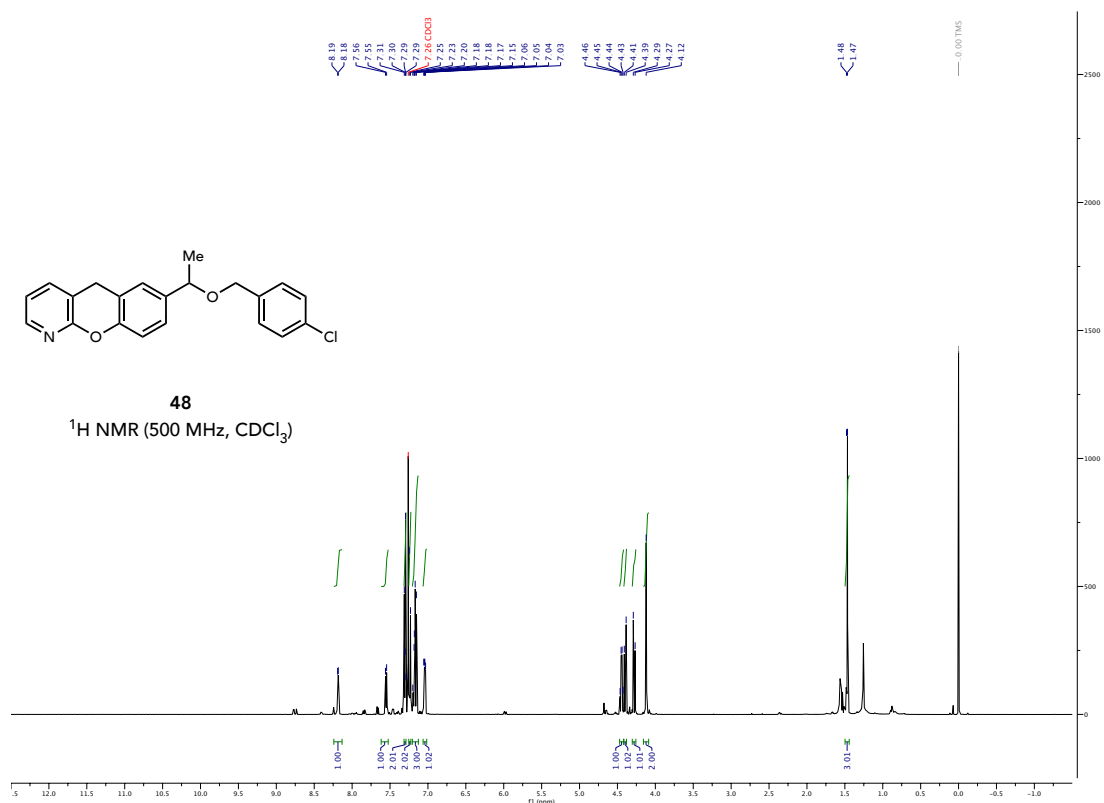

Figure S101. 500 MHz <sup>1</sup>H NMR spectrum of **48** in CDCl<sub>3</sub>.

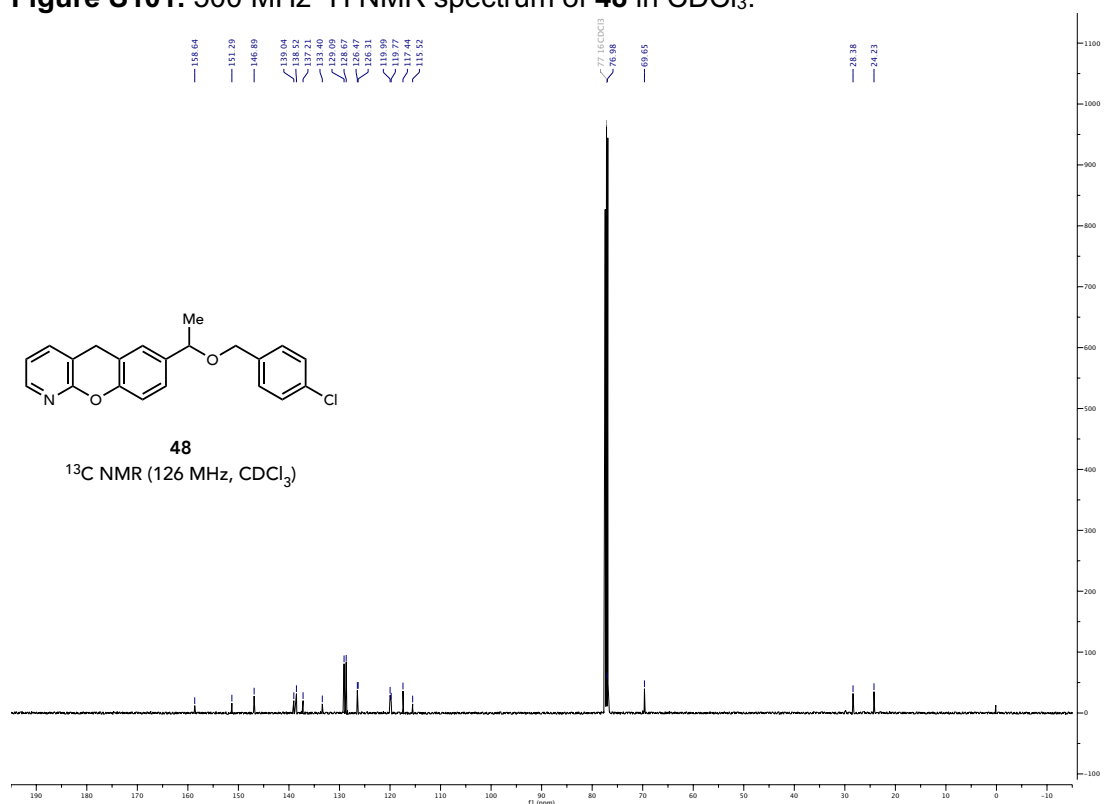

Figure S102. 126 MHz <sup>13</sup>C NMR spectrum of **48** in CDCl<sub>3</sub>.

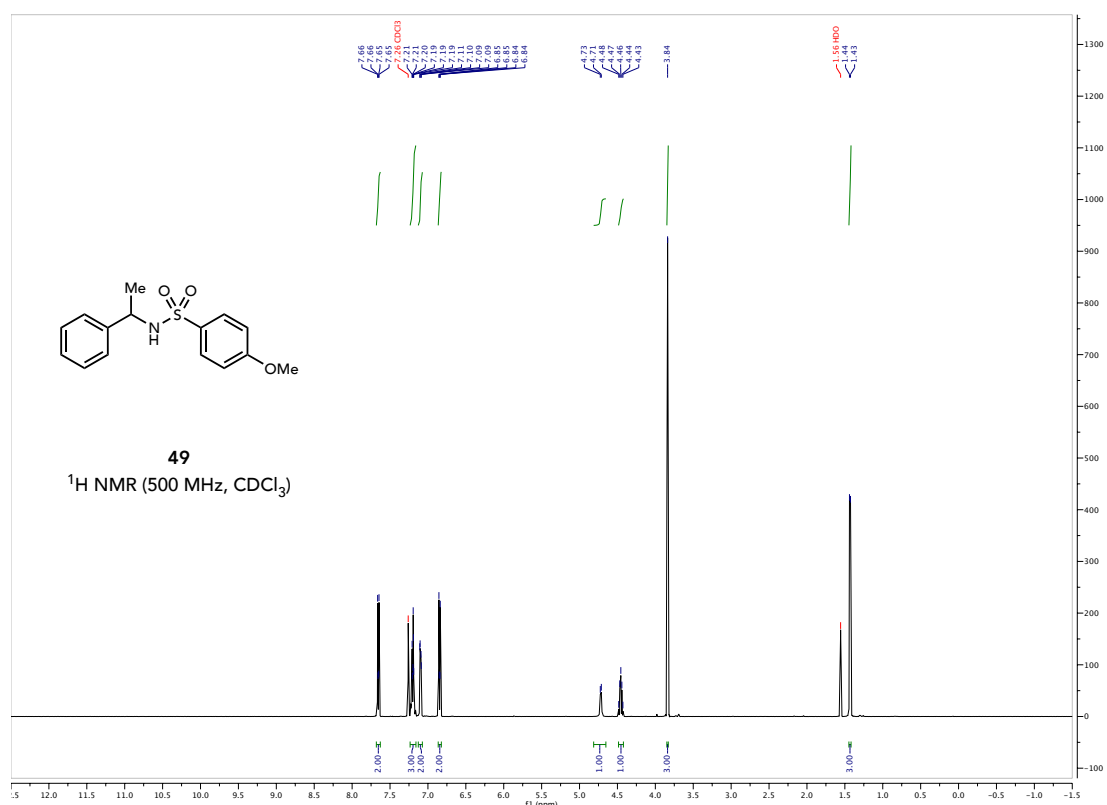

Figure S103. 500 MHz <sup>1</sup>H NMR spectrum of **49** in CDCl<sub>3</sub>.

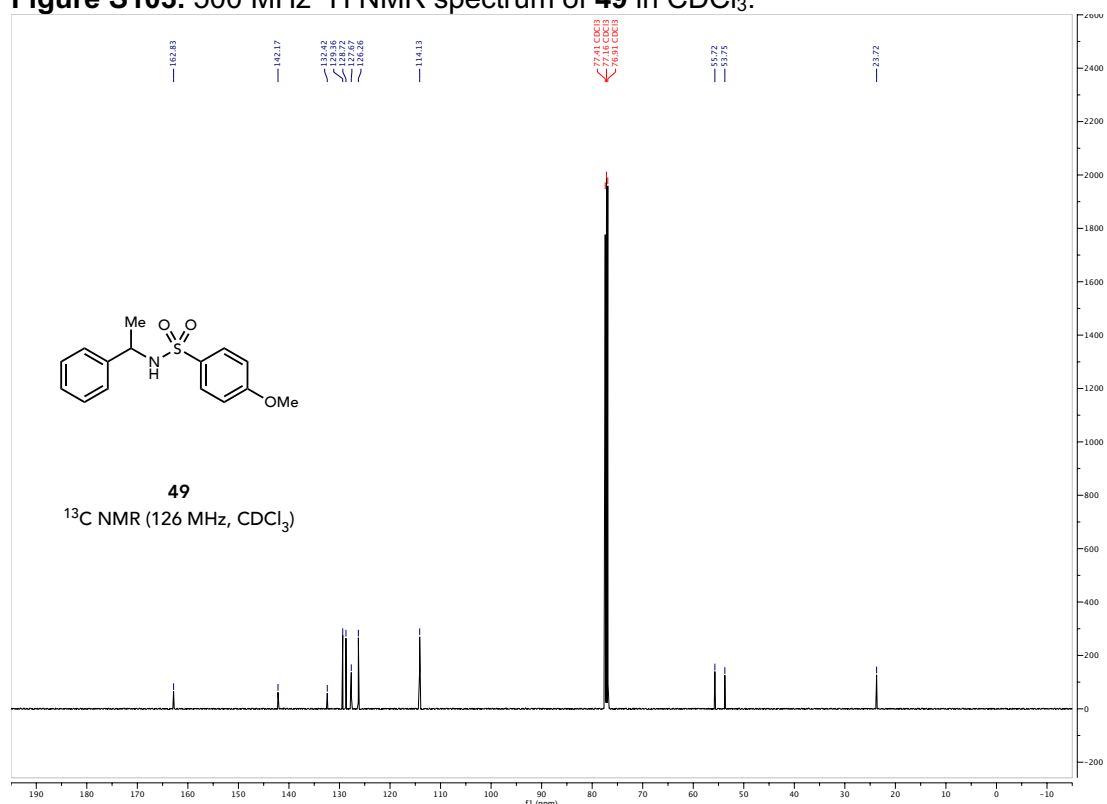

Figure S104. 126 MHz <sup>13</sup>C NMR spectrum of **49** in CDCl<sub>3</sub>.



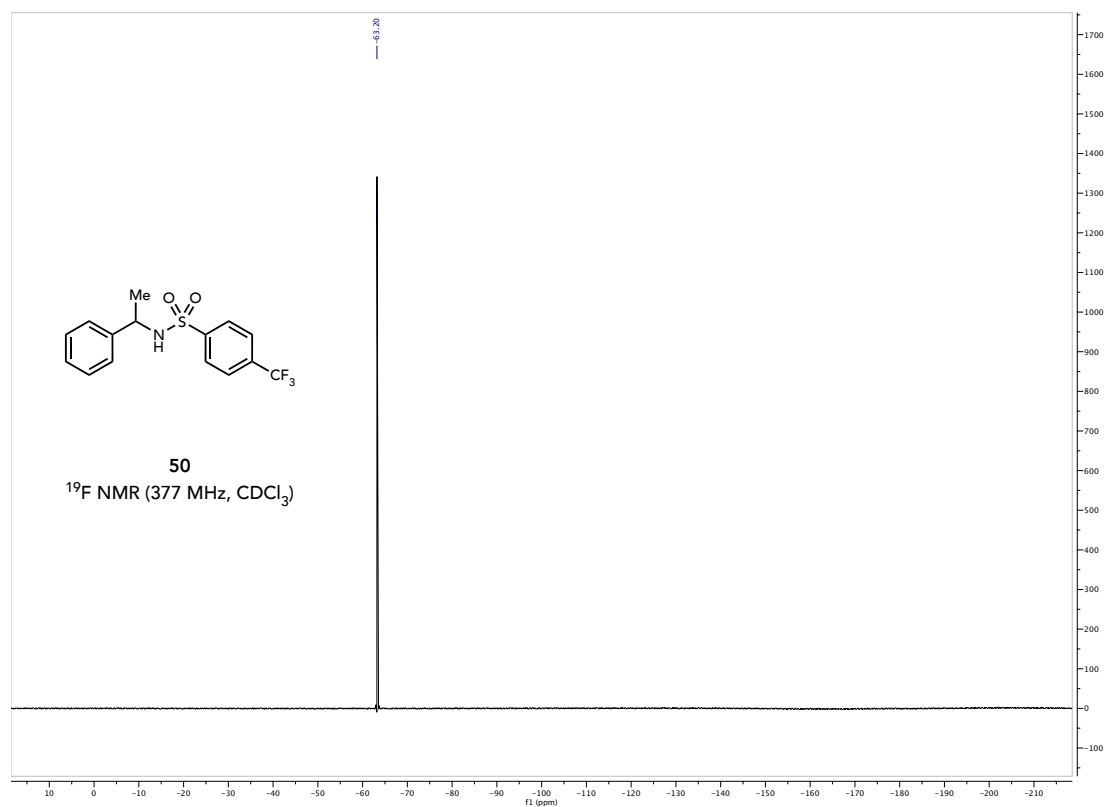

**Figure S107.** 377 MHz  $^{19}\text{F}$  NMR spectrum of **50** in  $\text{CDCl}_3$ .

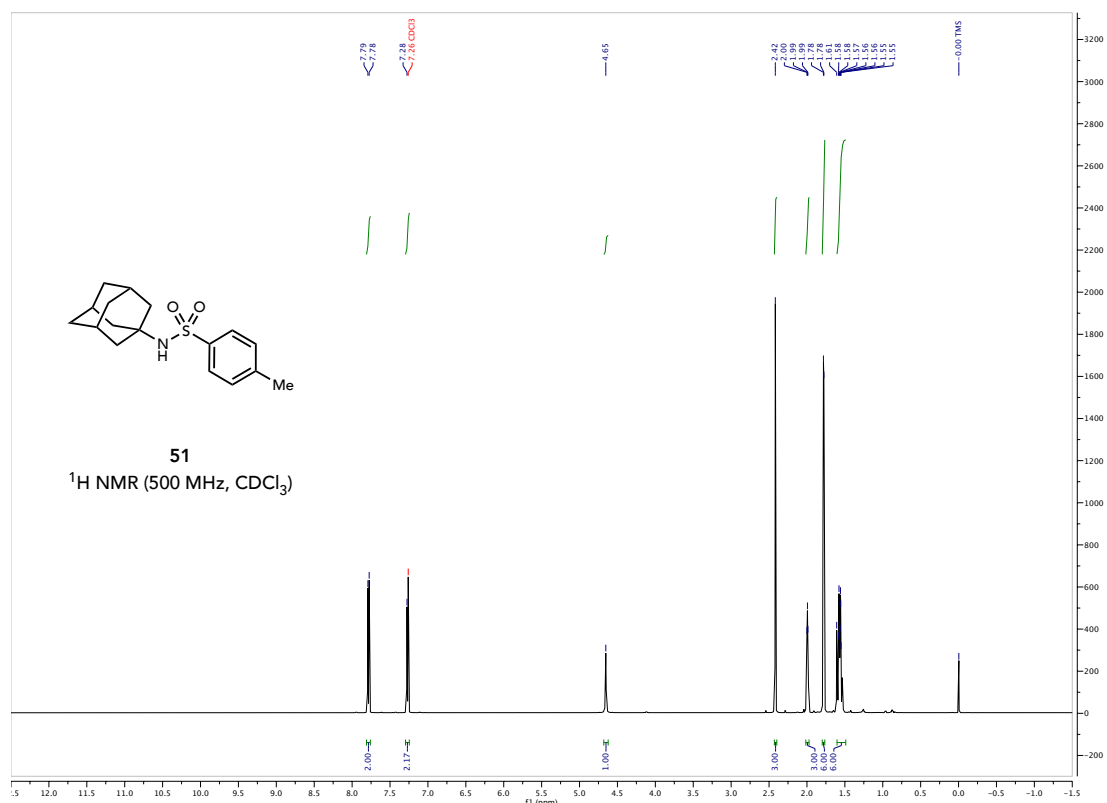

Figure S108. 500 MHz <sup>1</sup>H NMR spectrum of **51** in CDCl<sub>3</sub>.

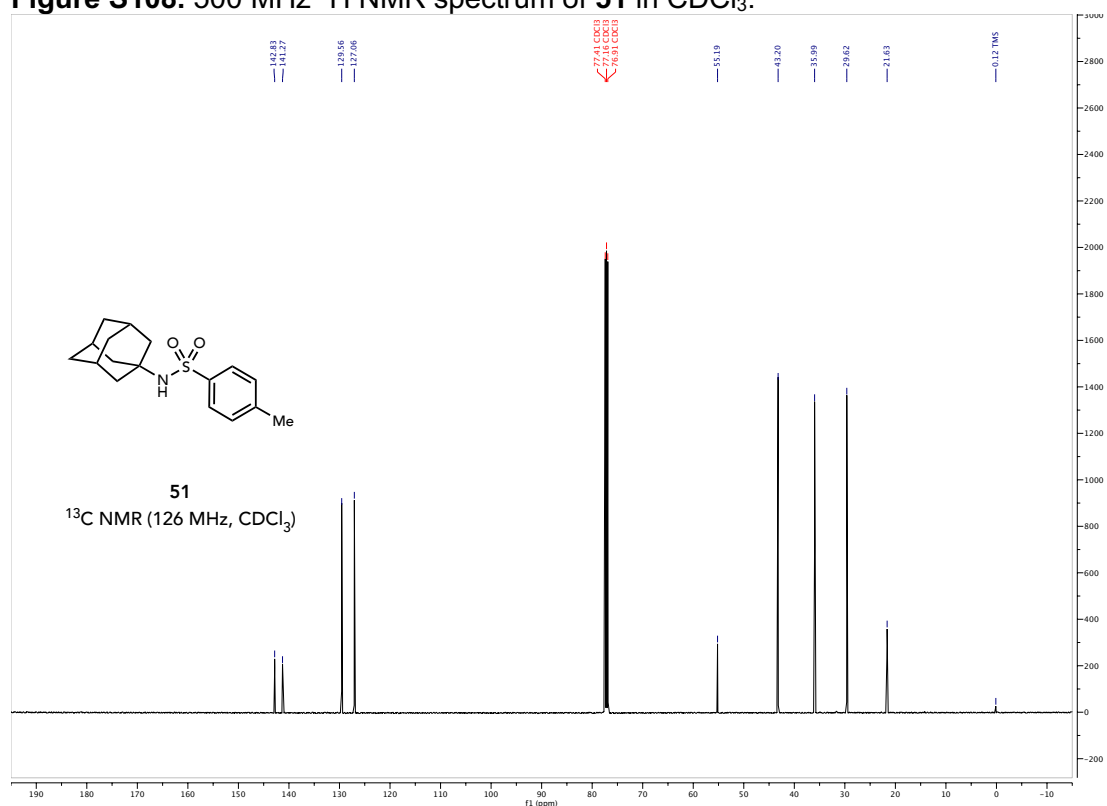

Figure S109. 126 MHz <sup>13</sup>C NMR spectrum of **51** in CDCl<sub>3</sub>.

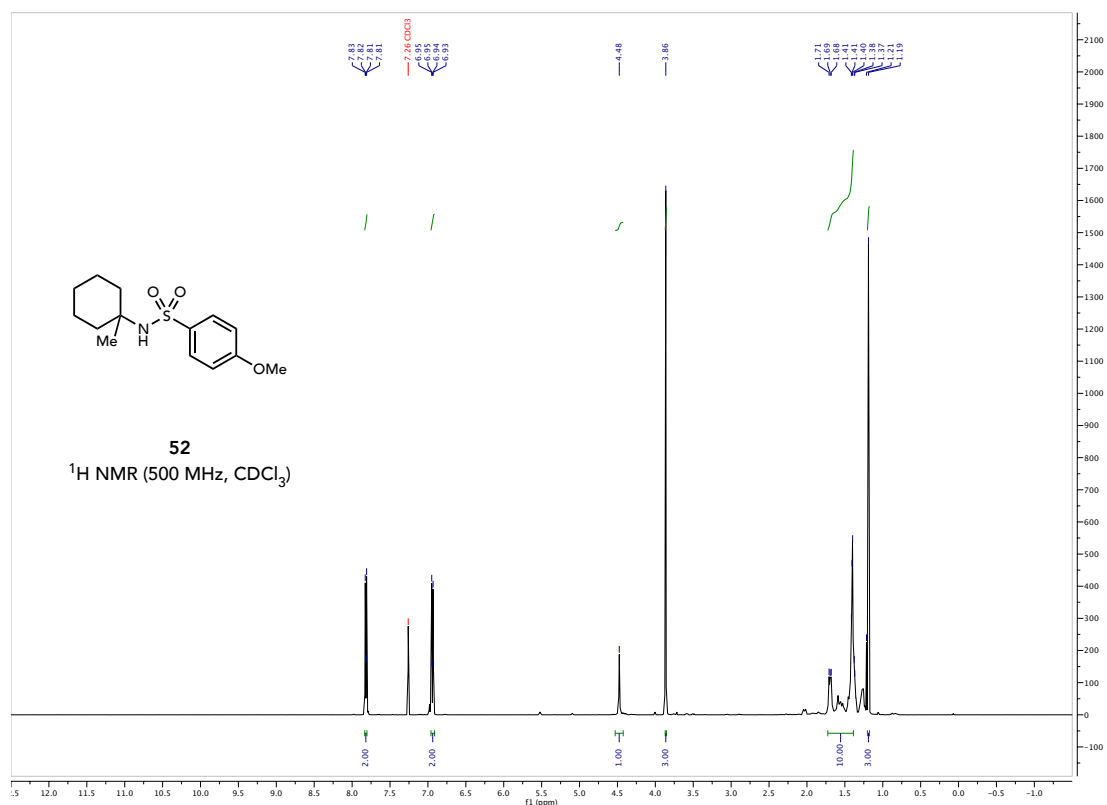

Figure S110. 500 MHz <sup>1</sup>H NMR spectrum of **52** in CDCl<sub>3</sub>.

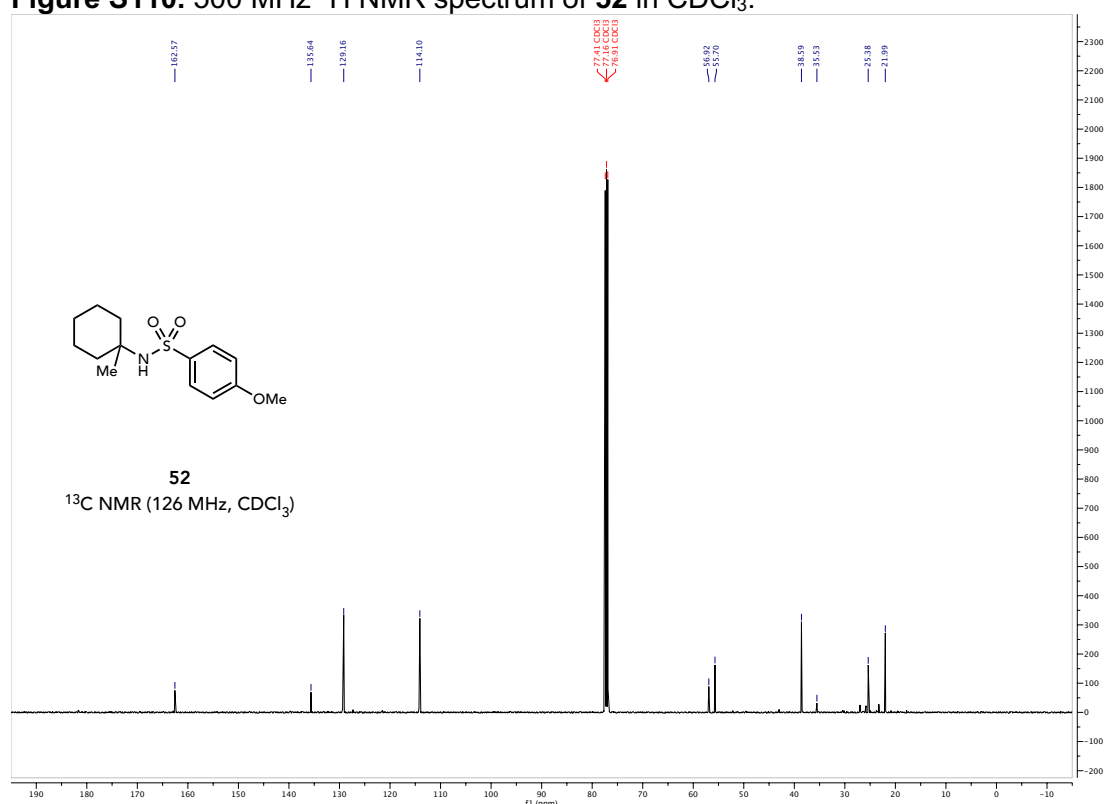

Figure S111. 126 MHz <sup>13</sup>C NMR spectrum of **52** in CDCl<sub>3</sub>.

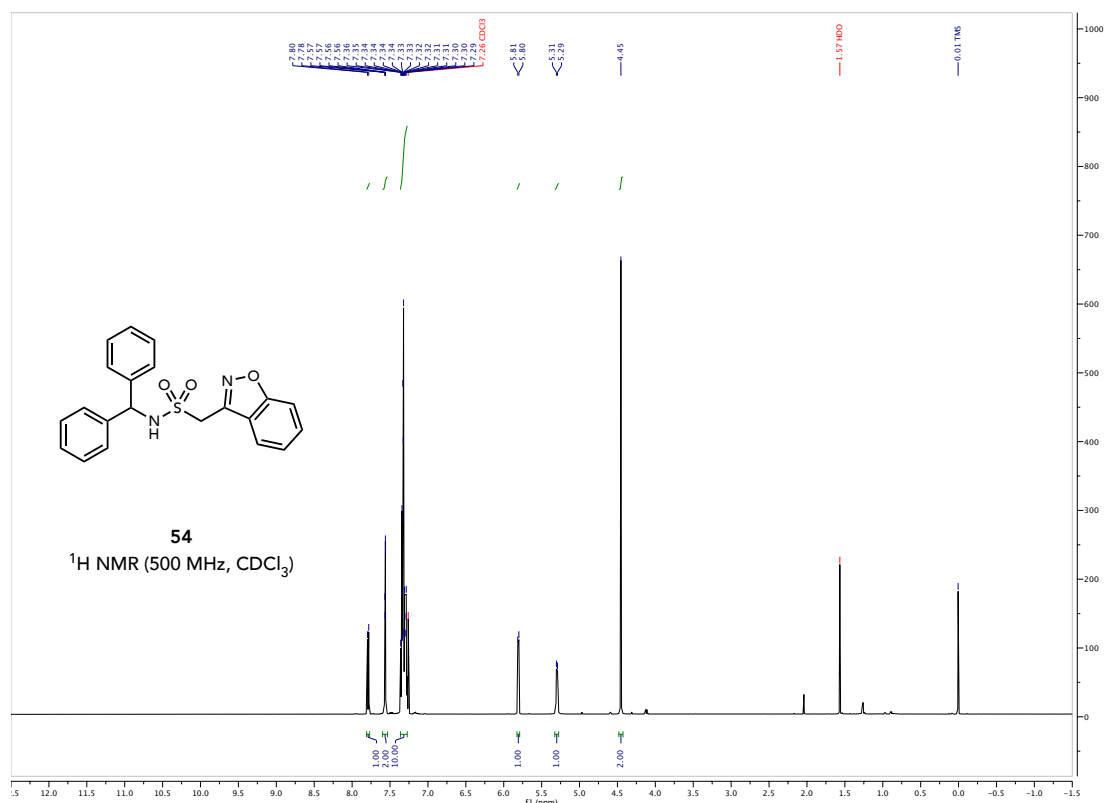

Figure S112. 500 MHz <sup>1</sup>H NMR spectrum of **54** in CDCl<sub>3</sub>.

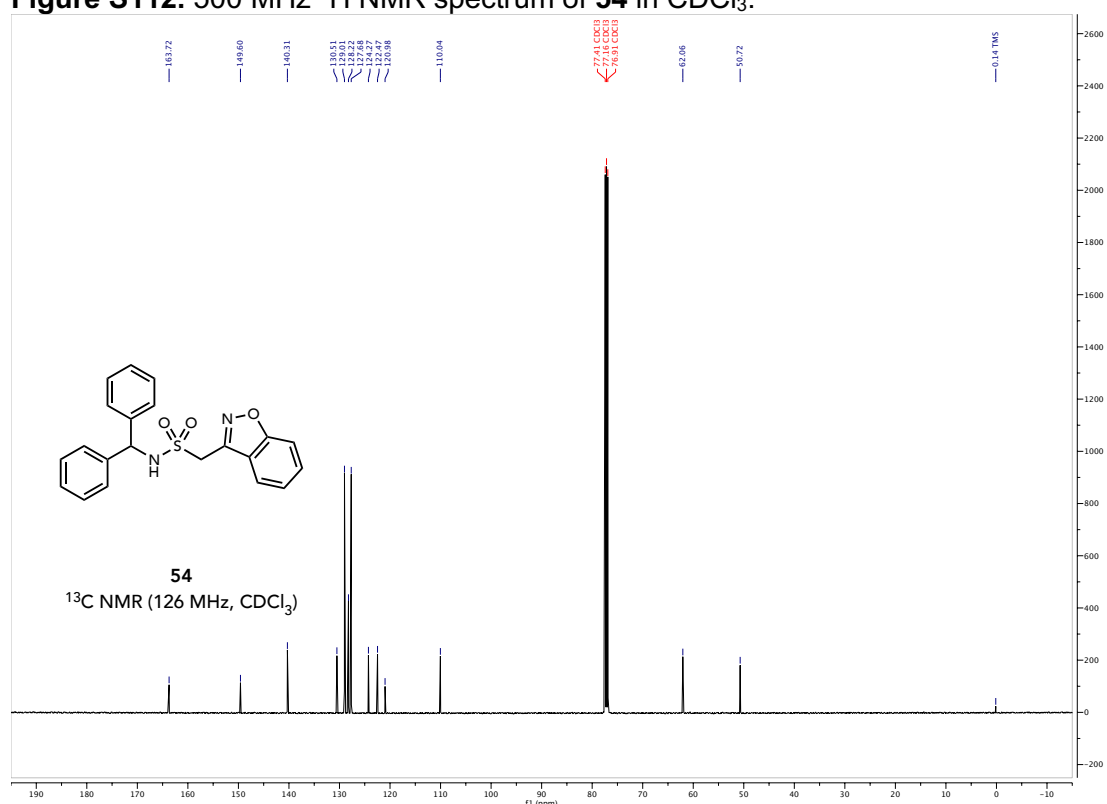

Figure S113. 126 MHz <sup>13</sup>C NMR spectrum of **54** in CDCl<sub>3</sub>.



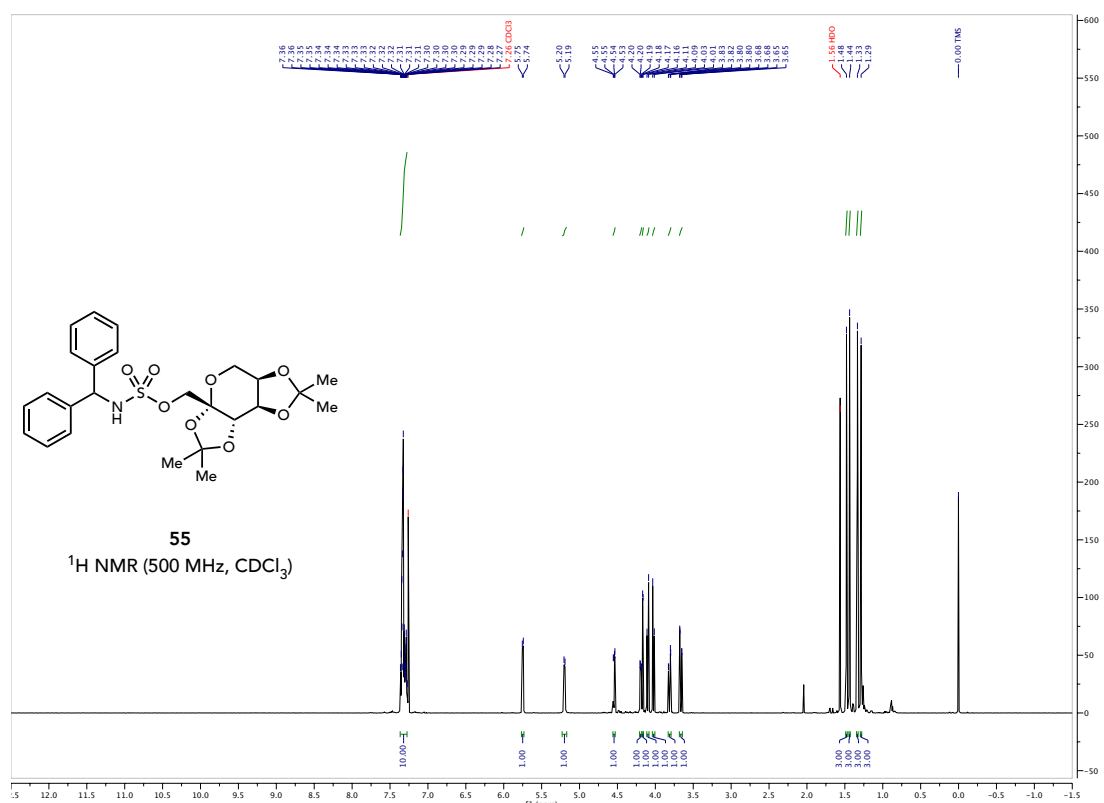

Figure S114. 500 MHz  $^1\text{H NMR}$  spectrum of **55** in  $\text{CDCl}_3$ .

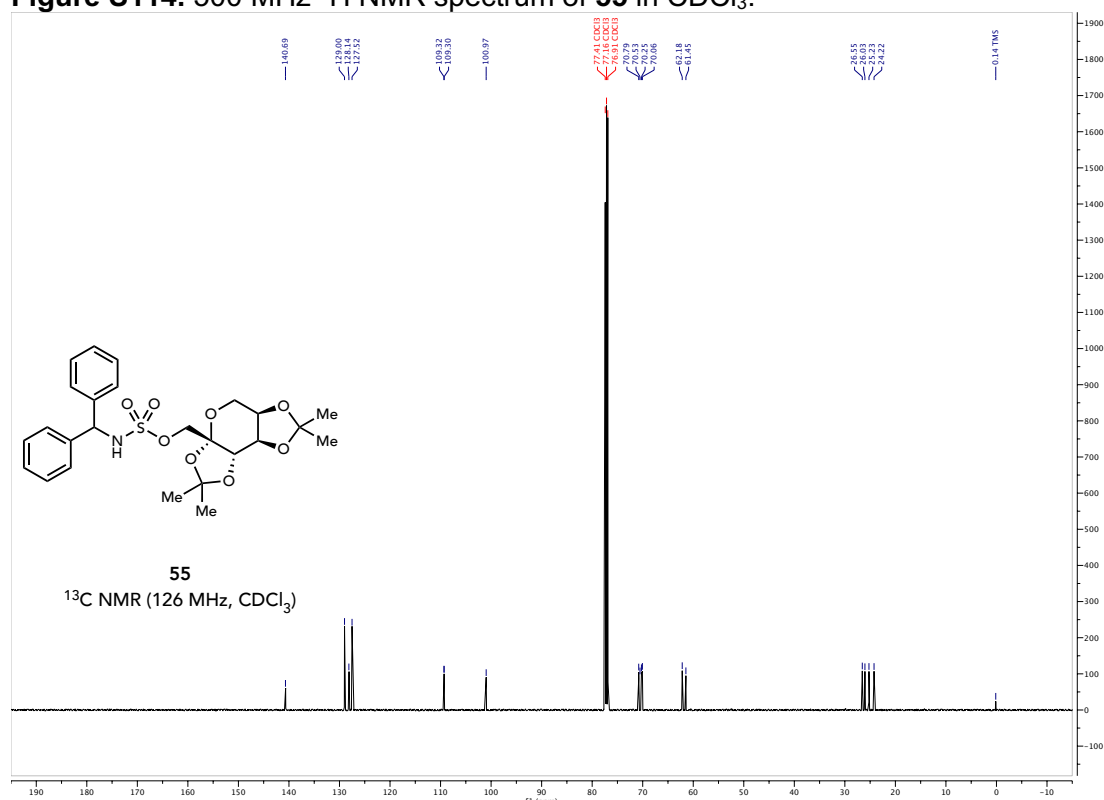

Figure S115. 126 MHz  $^{13}\text{C NMR}$  spectrum of **55** in  $\text{CDCl}_3$ .





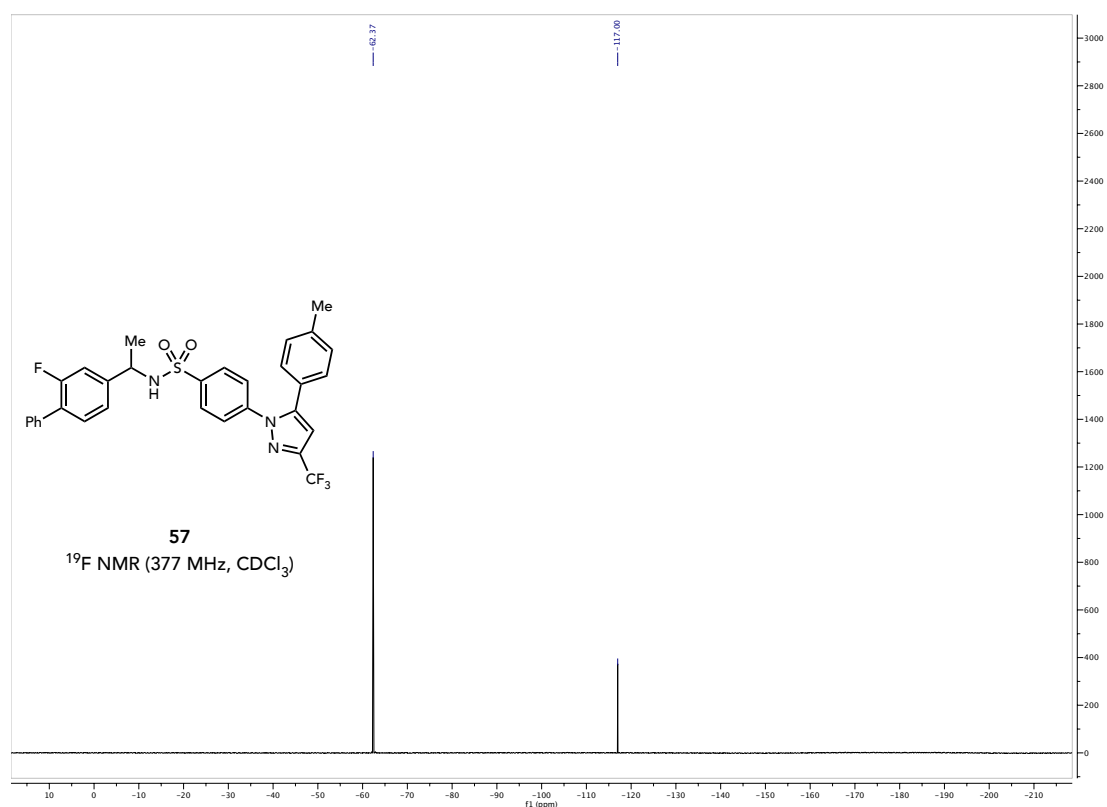

Figure S120. 377 MHz  $^{19}\text{F}$  NMR spectrum of **57** in  $\text{CDCl}_3$ .

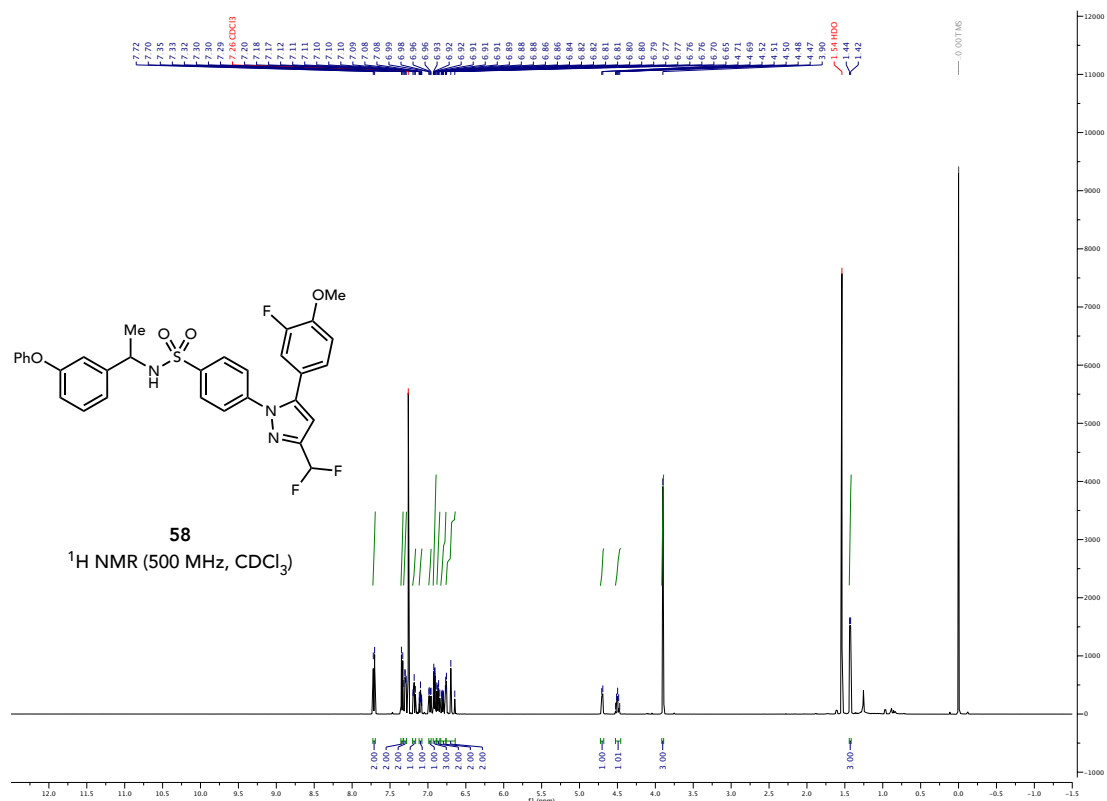

Figure S121. 500 MHz  $^1\text{H NMR}$  spectrum of **58** in  $\text{CDCl}_3$ .

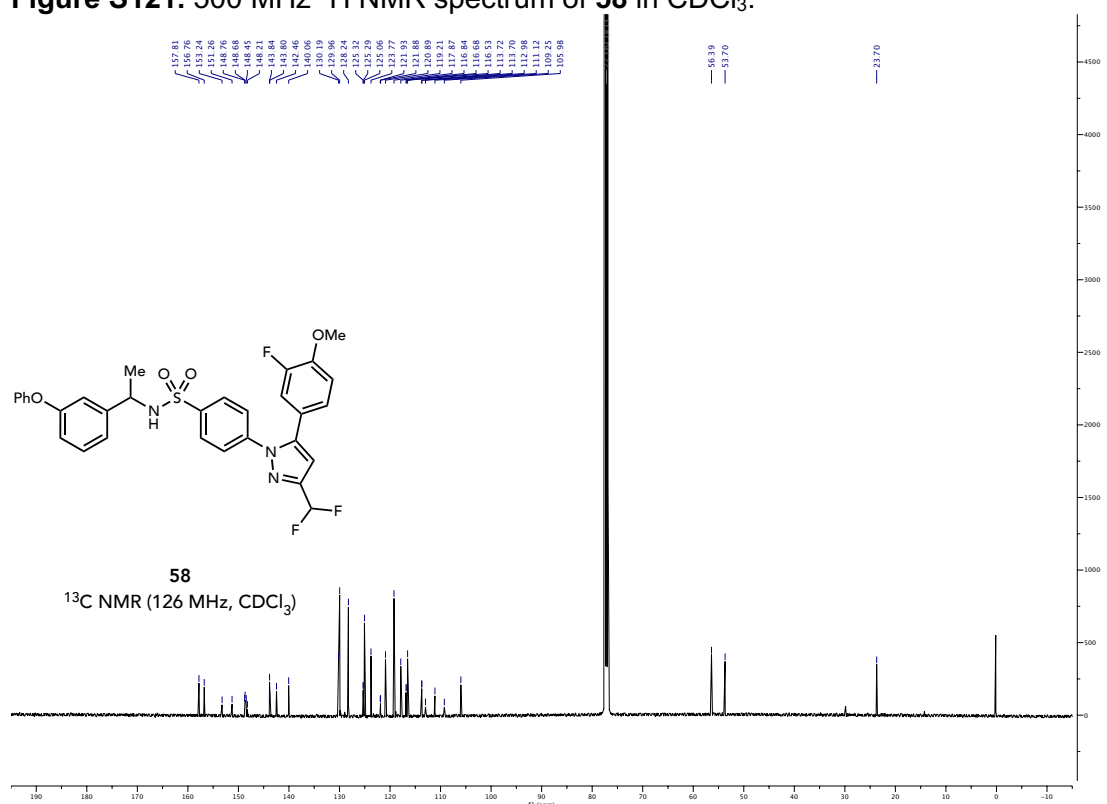

Figure S122. 126 MHz  $^{13}\text{C NMR}$  spectrum of **58** in  $\text{CDCl}_3$ .

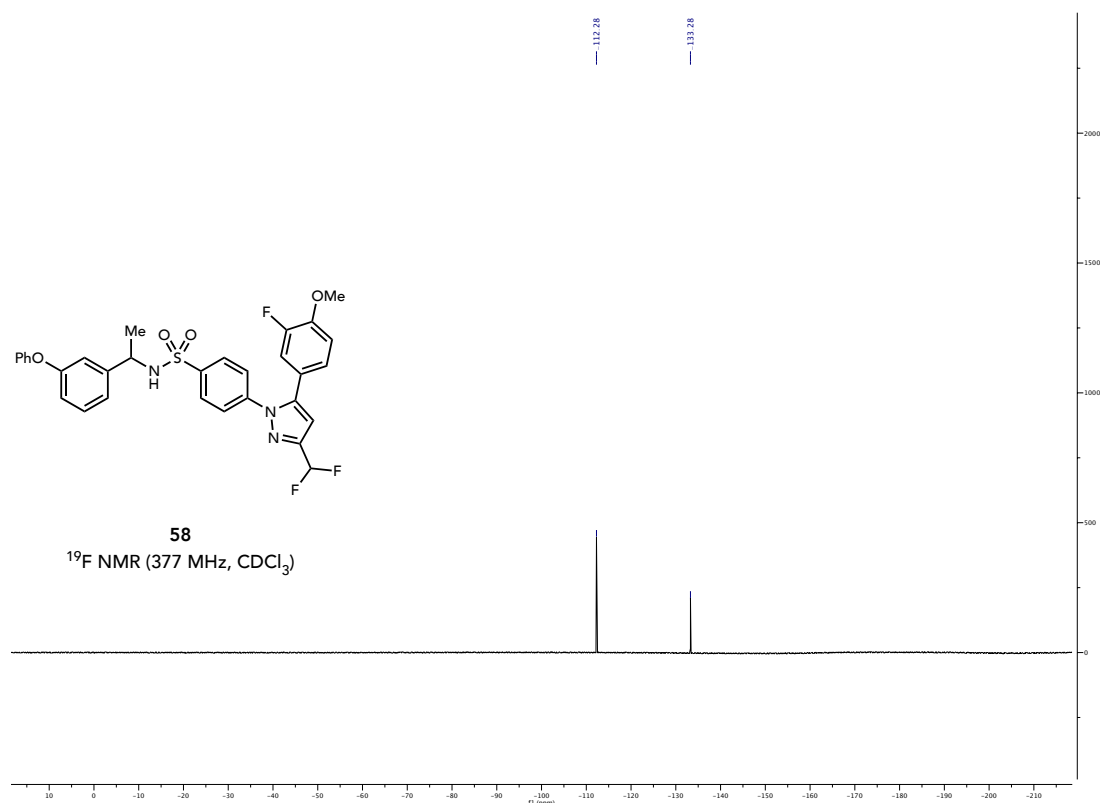

**Figure S123.** 377 MHz  $^{19}\text{F}$  NMR spectrum of **58** in  $\text{CDCl}_3$ .

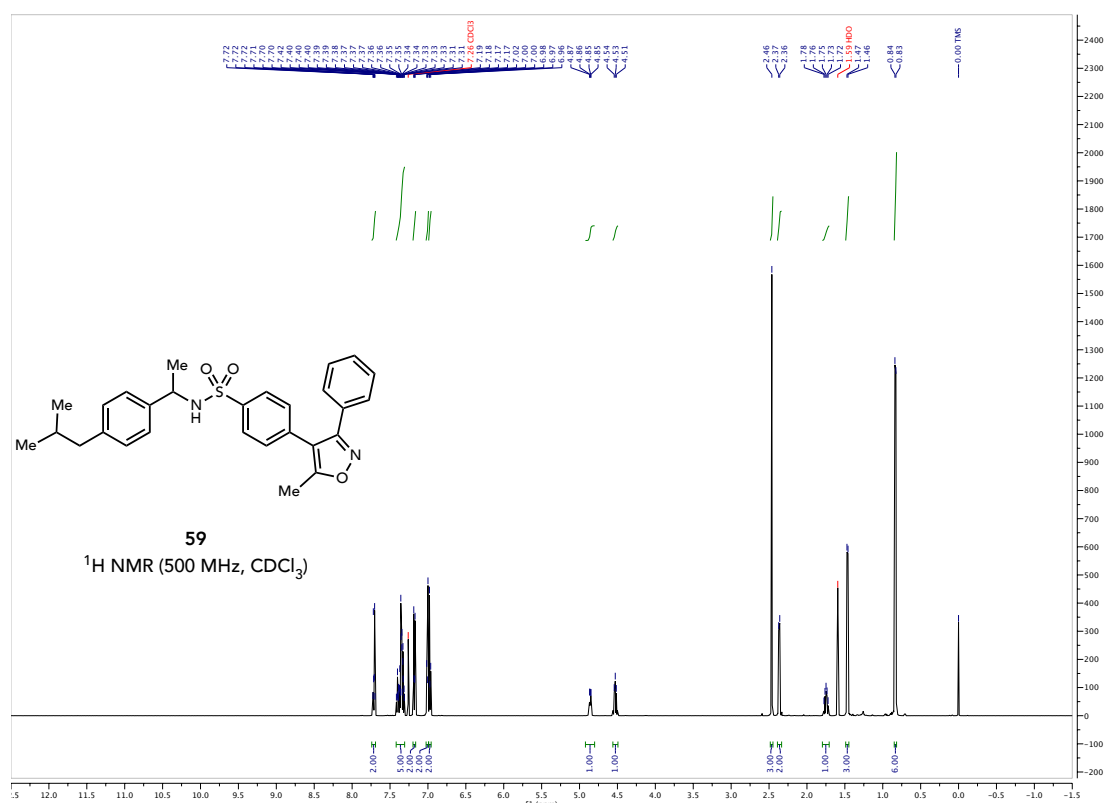

Figure S124. 500 MHz <sup>1</sup>H NMR spectrum of **59** in CDCl<sub>3</sub>.

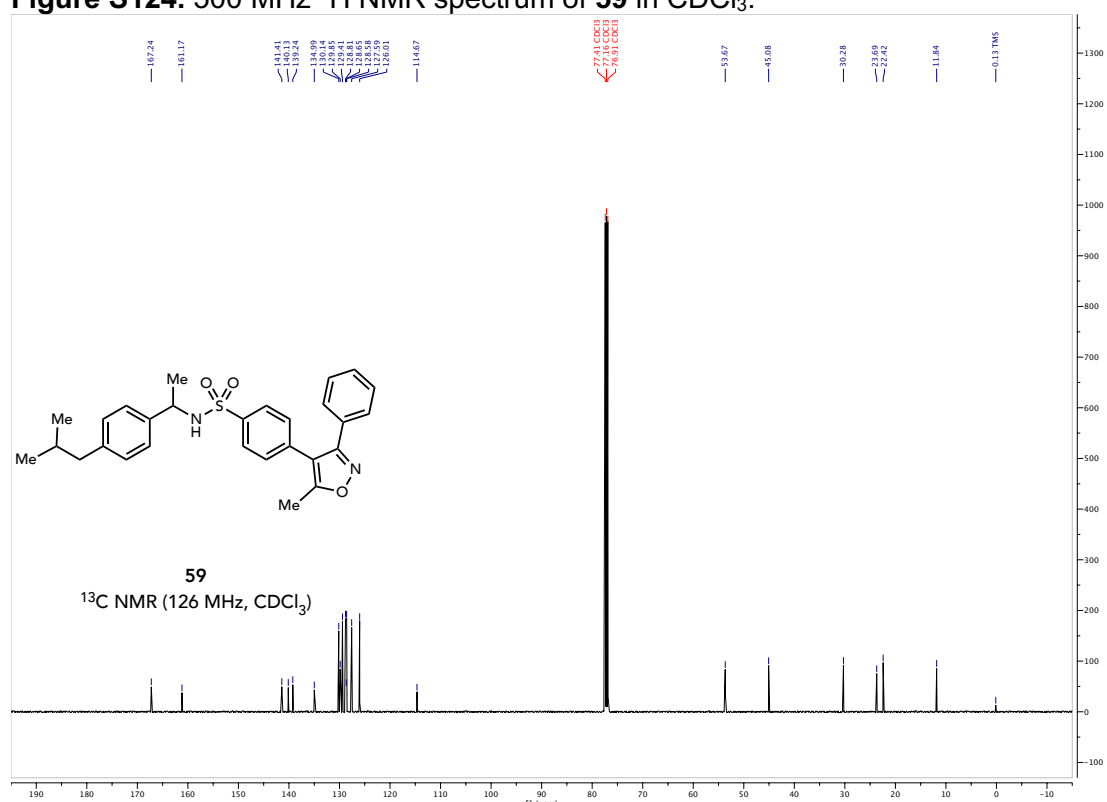

Figure S125. 126 MHz <sup>13</sup>C NMR spectrum of **59** in CDCl<sub>3</sub>.





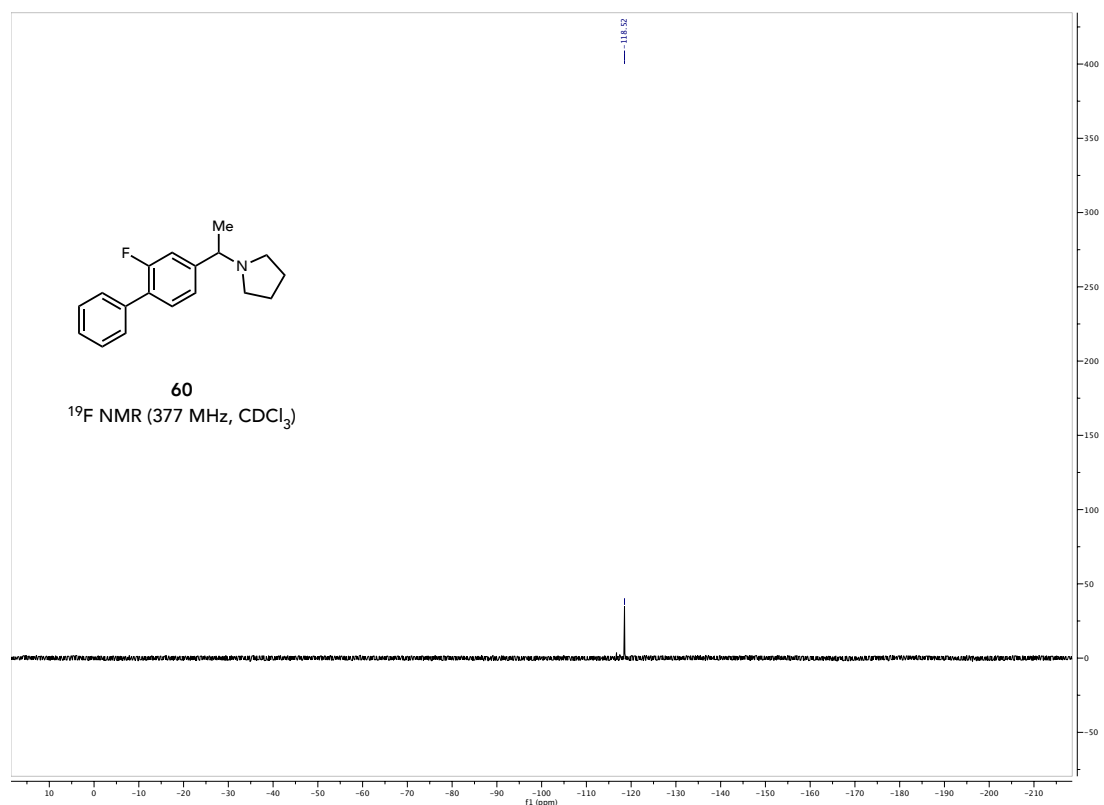

Figure S128. 377 MHz  $^{19}\text{F}$  NMR spectrum of **60** in  $\text{CDCl}_3$ .



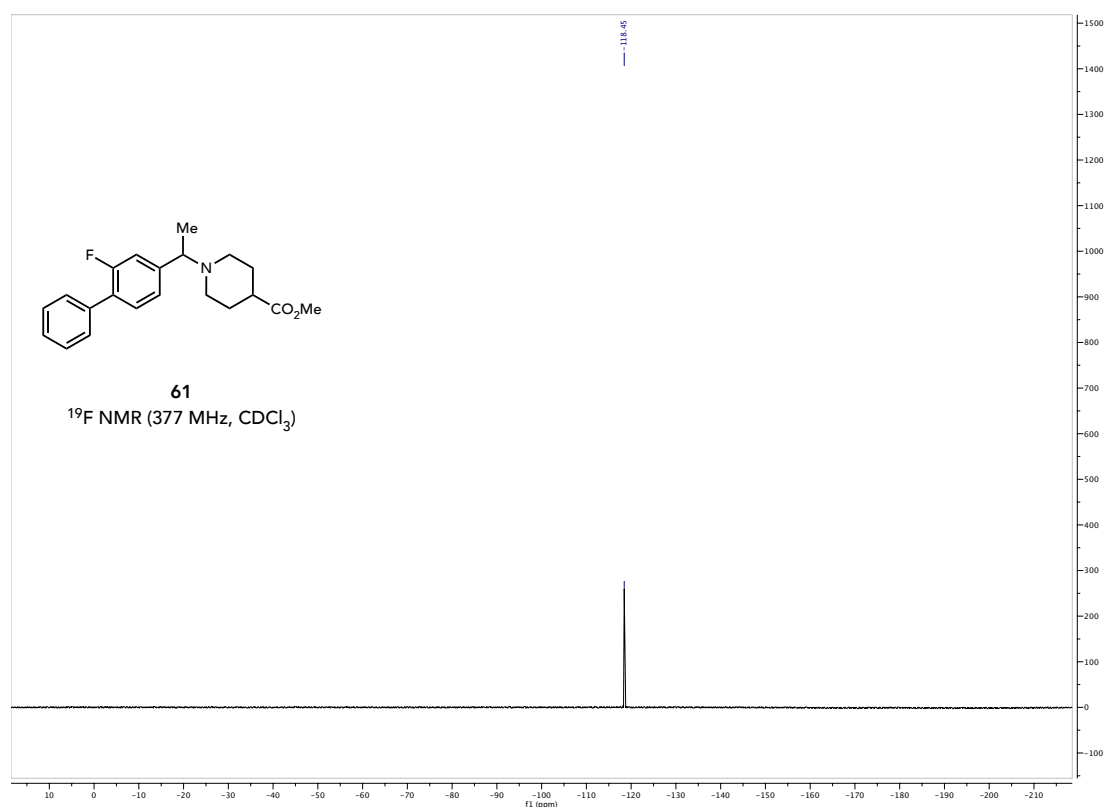

**Figure S131.** 377 MHz  $^{19}\text{F}$  NMR spectrum of **61** in  $\text{CDCl}_3$ .

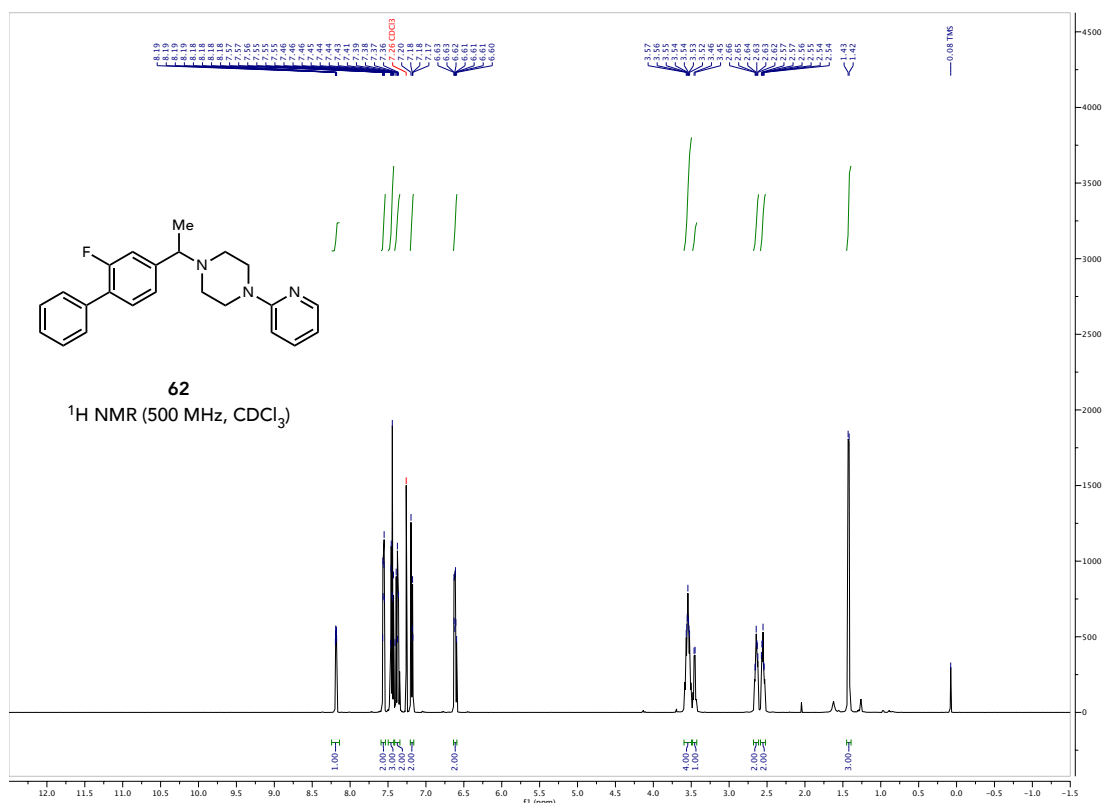

Figure S132. 500 MHz <sup>1</sup>H NMR spectrum of **62** in CDCl<sub>3</sub>.

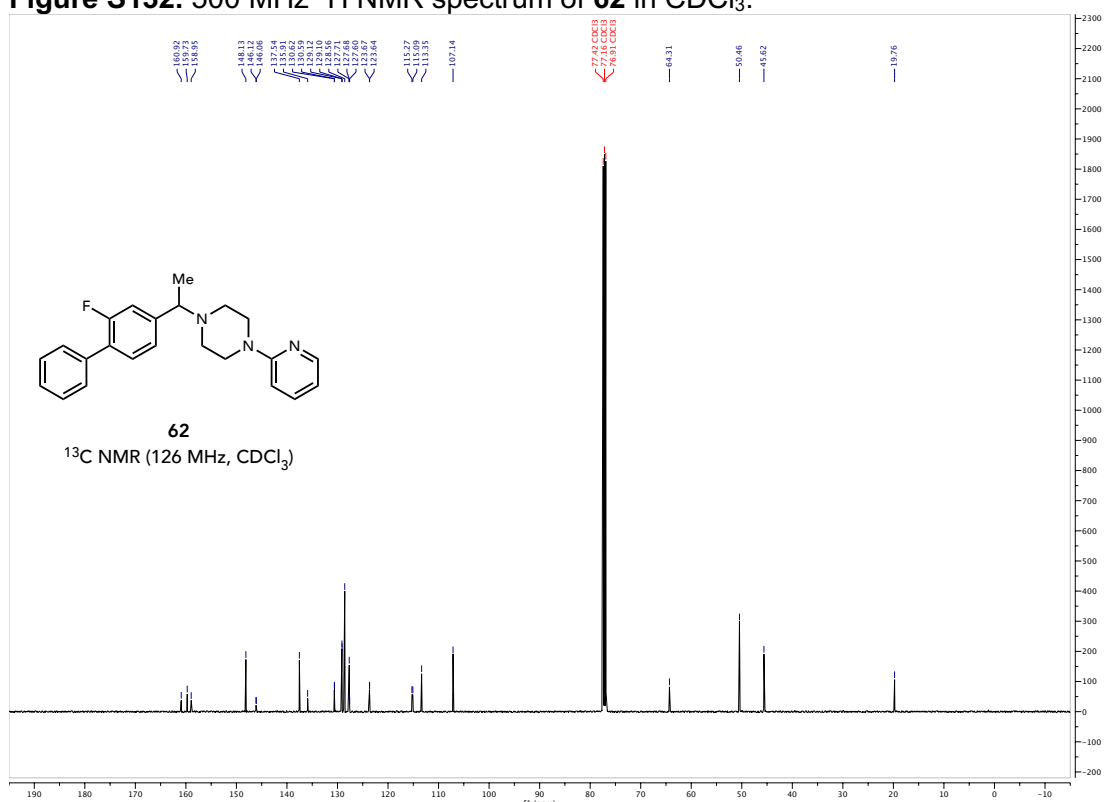

Figure S133. 126 MHz <sup>13</sup>C NMR spectrum of **62** in CDCl<sub>3</sub>.

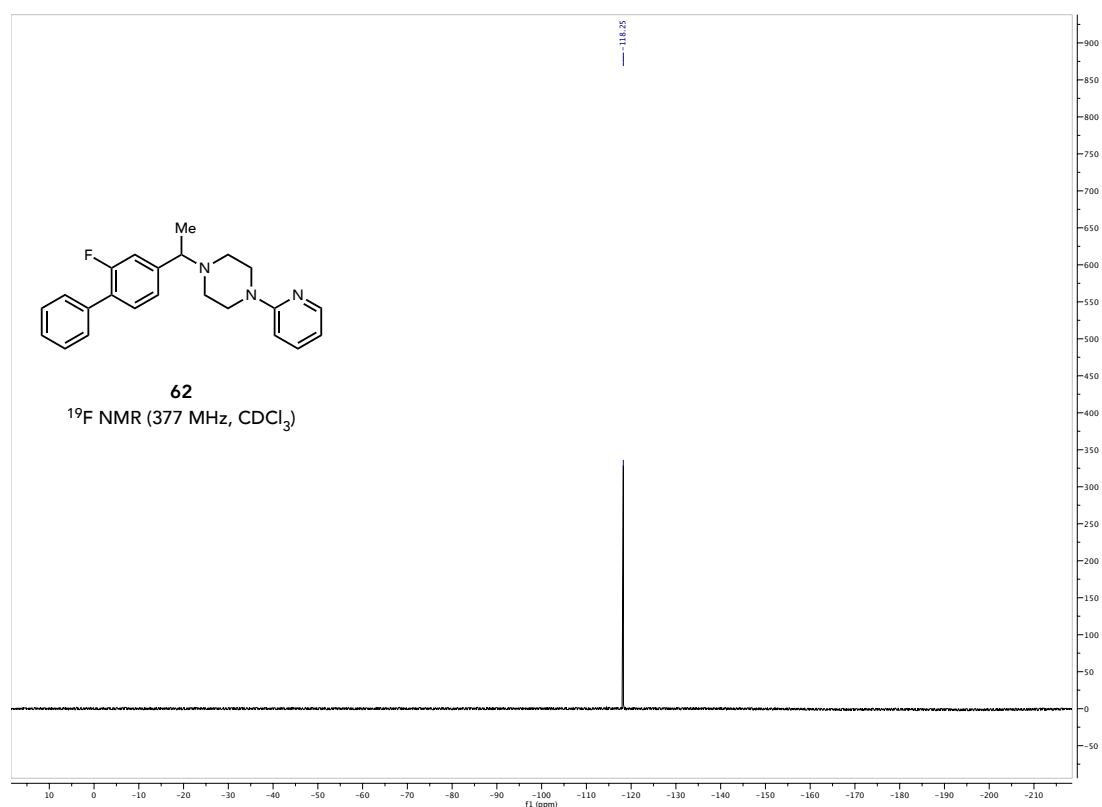

**Figure S134.** 377 MHz  $^{19}\text{F}$  NMR spectrum of **62** in  $\text{CDCl}_3$ .



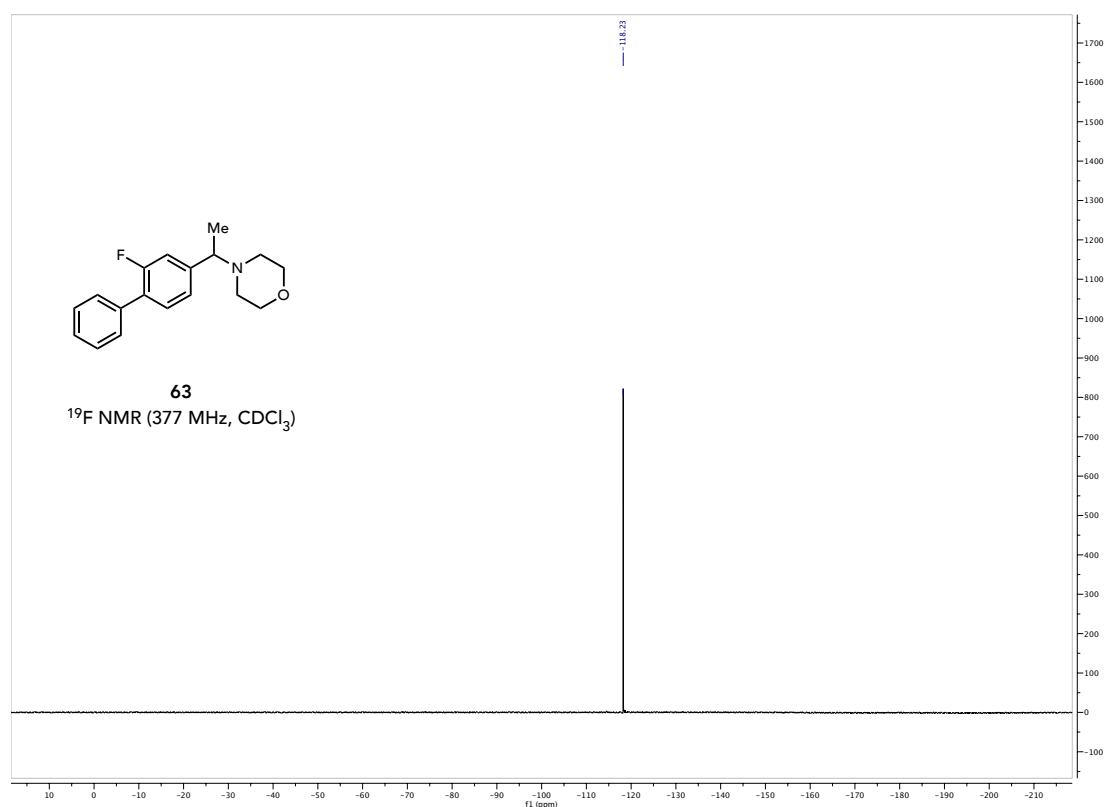

**Figure S137.** 377 MHz  $^{19}\text{F}$  NMR spectrum of **63** in  $\text{CDCl}_3$ .

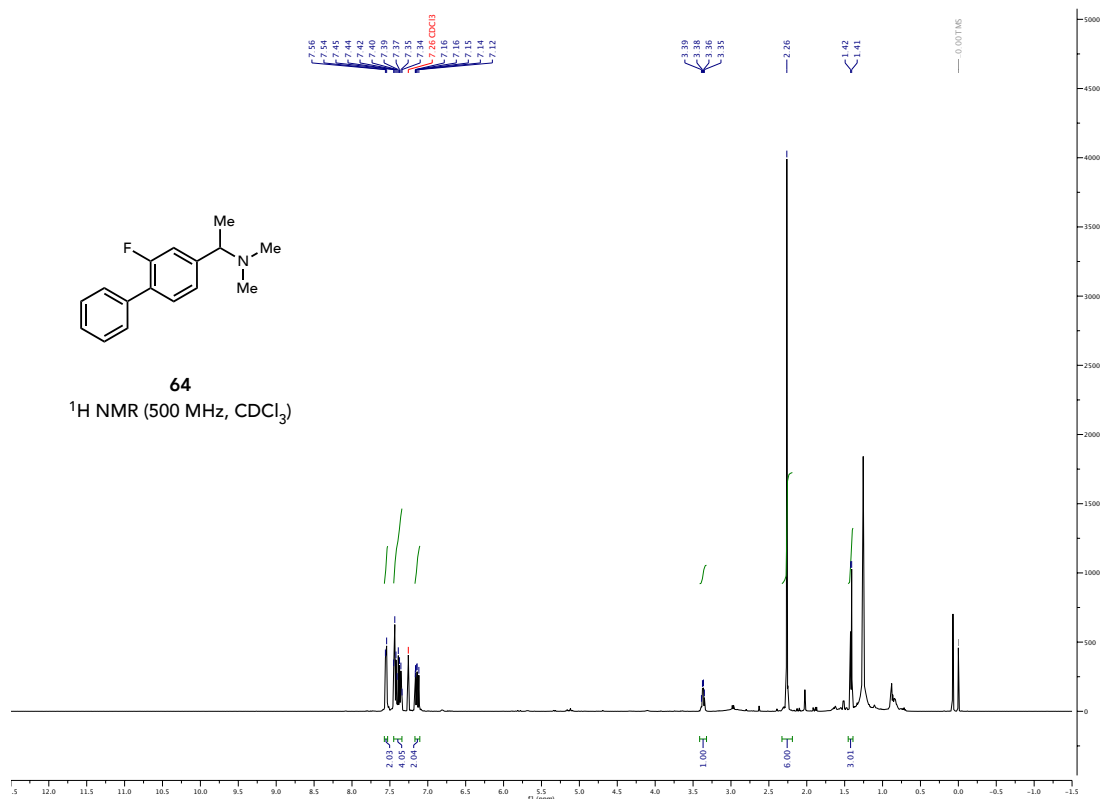

Figure S138. 500 MHz <sup>1</sup>H NMR spectrum of **64** in CDCl<sub>3</sub>.

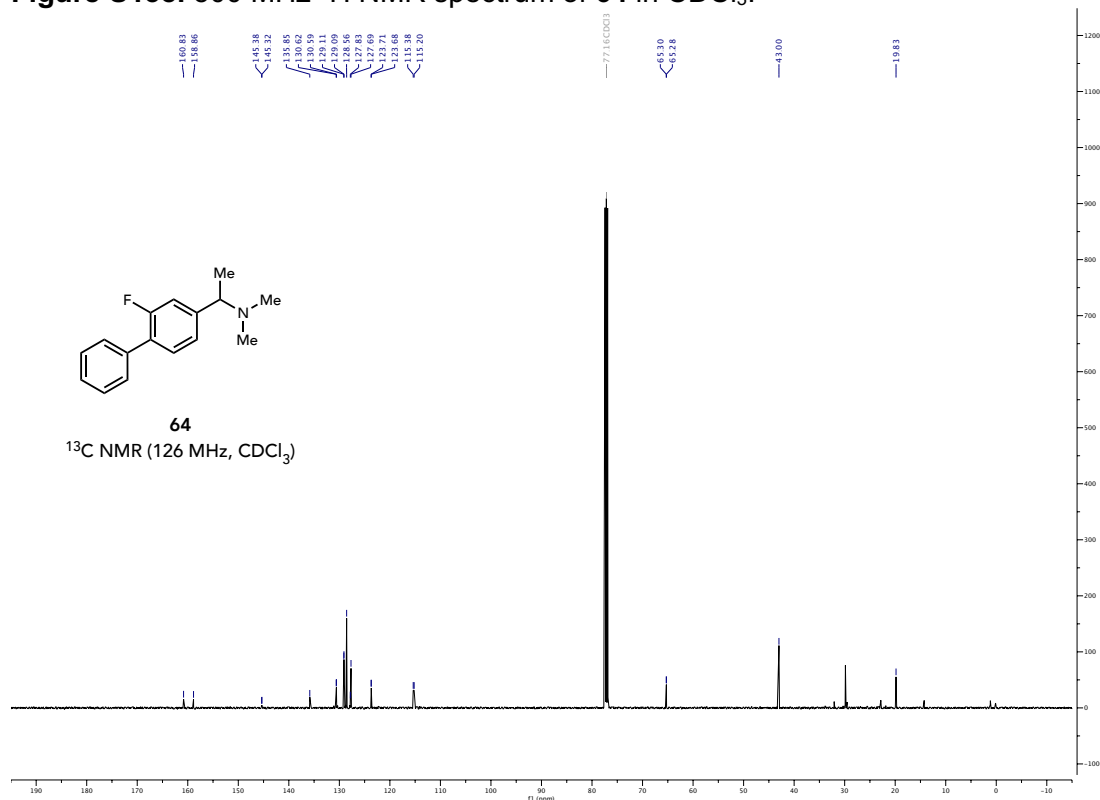

Figure S139. 126 MHz <sup>13</sup>C NMR spectrum of **64** in CDCl<sub>3</sub>.



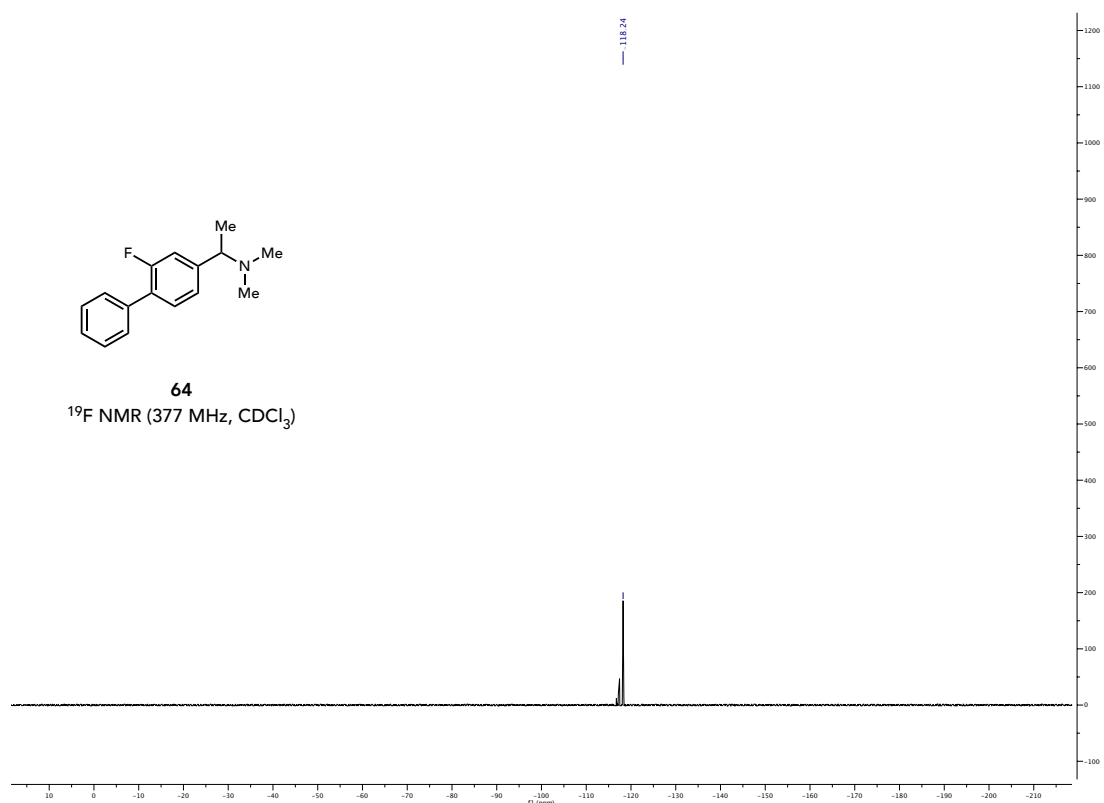

Figure S140. 377 MHz  $^{19}\text{F}$  NMR spectrum of **64** in  $\text{CDCl}_3$ .



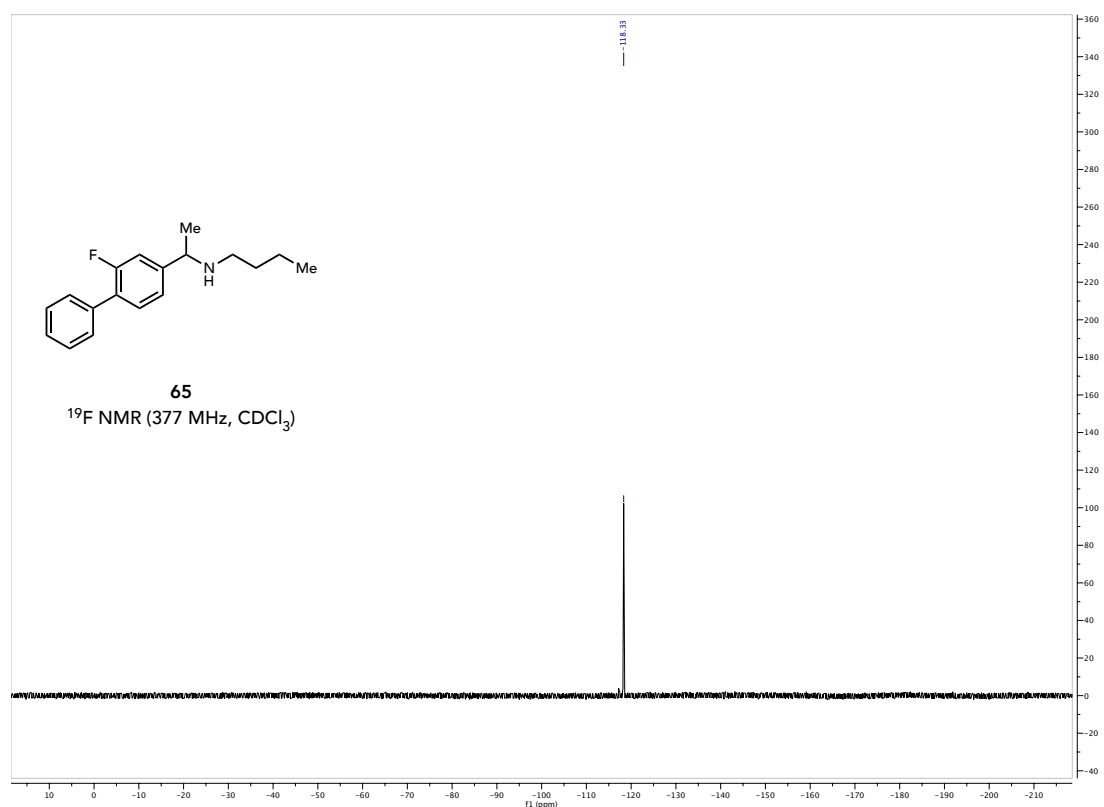

Figure S143. 377 MHz  $^{19}\text{F}$  NMR spectrum of **65** in  $\text{CDCl}_3$ .





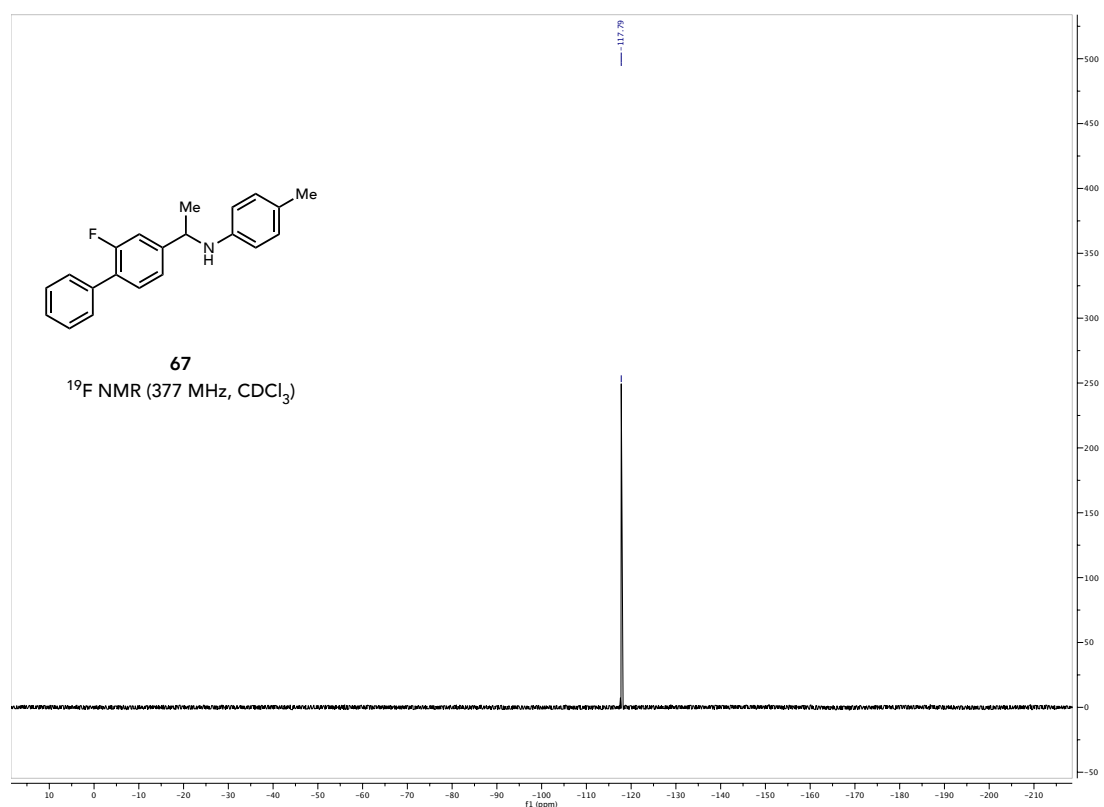

Figure S148. 377 MHz  $^{19}\text{F}$  NMR spectrum of **67** in  $\text{CDCl}_3$ .



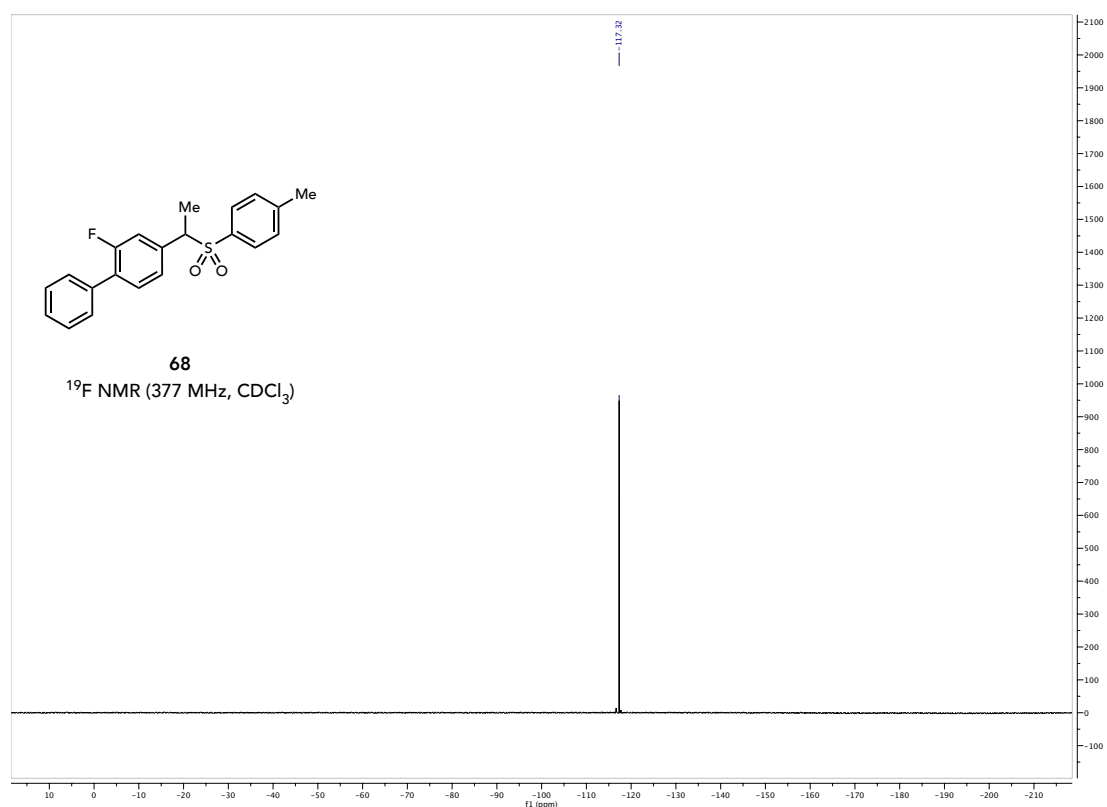

Figure S151. 377 MHz  $^{19}\text{F}$  NMR spectrum of **68** in  $\text{CDCl}_3$ .



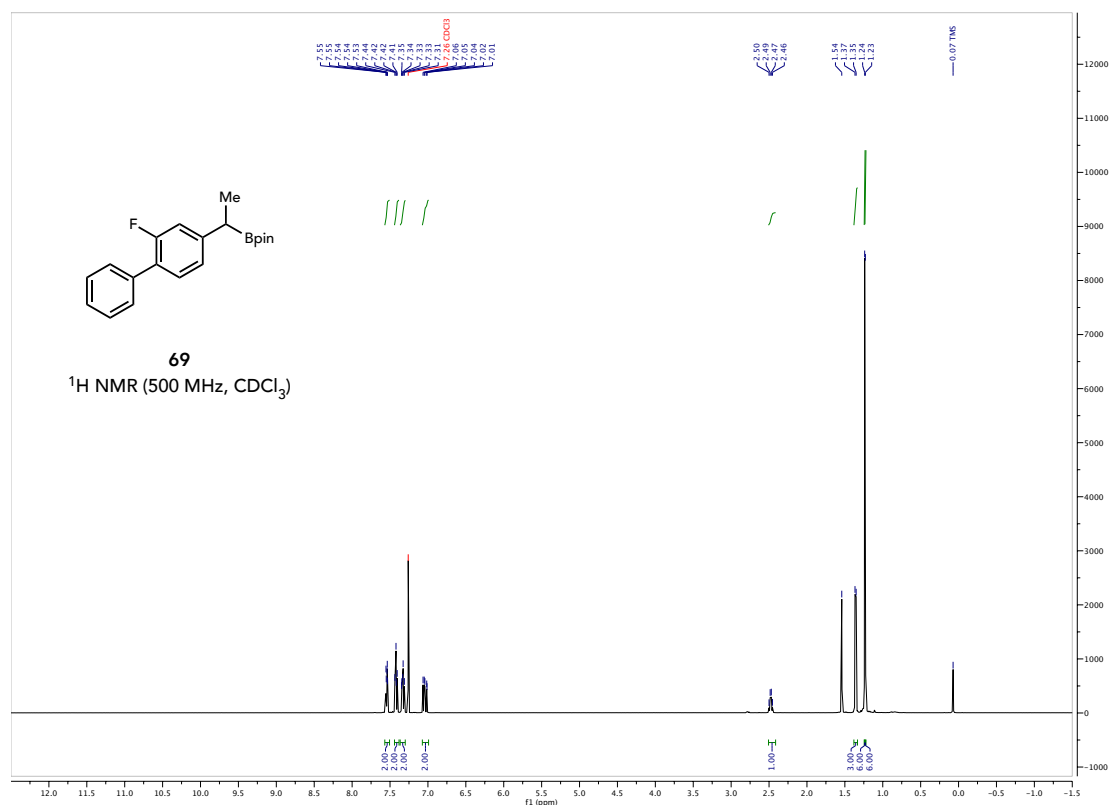

Figure S152. 500 MHz  $^1\text{H NMR}$  spectrum of **69** in  $\text{CDCl}_3$ .

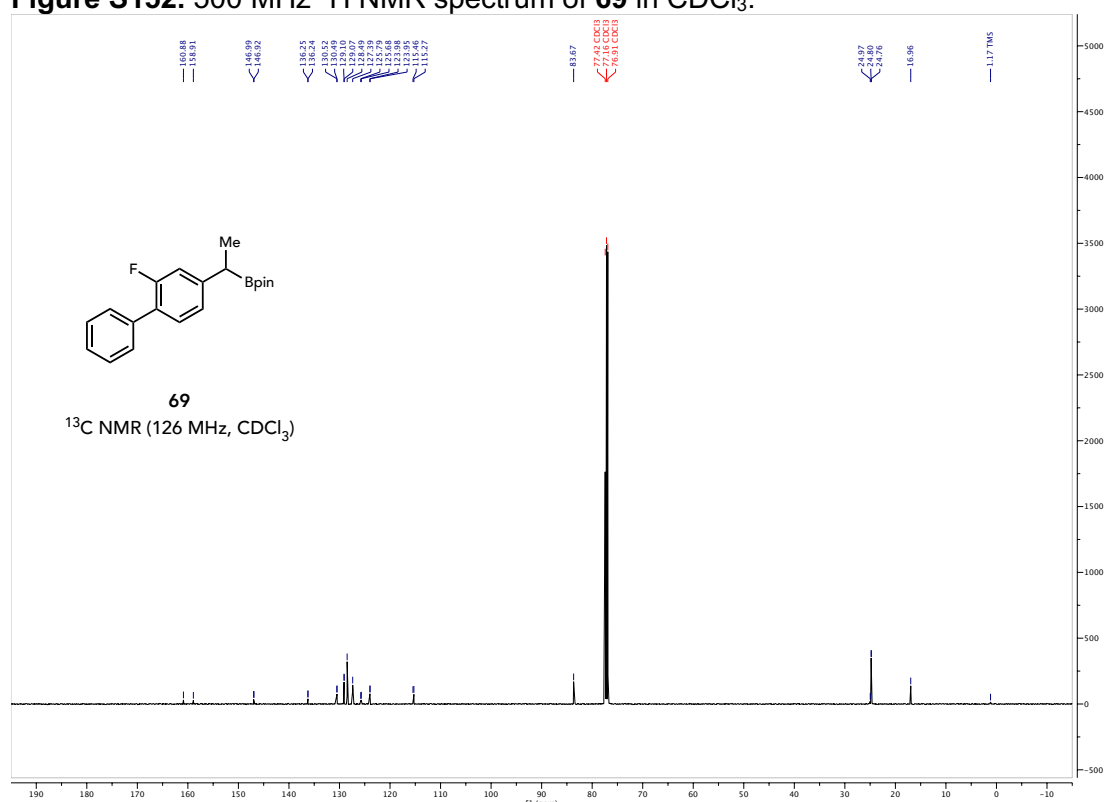

Figure S153. 126 MHz  $^{13}\text{C NMR}$  spectrum of **69** in  $\text{CDCl}_3$ .

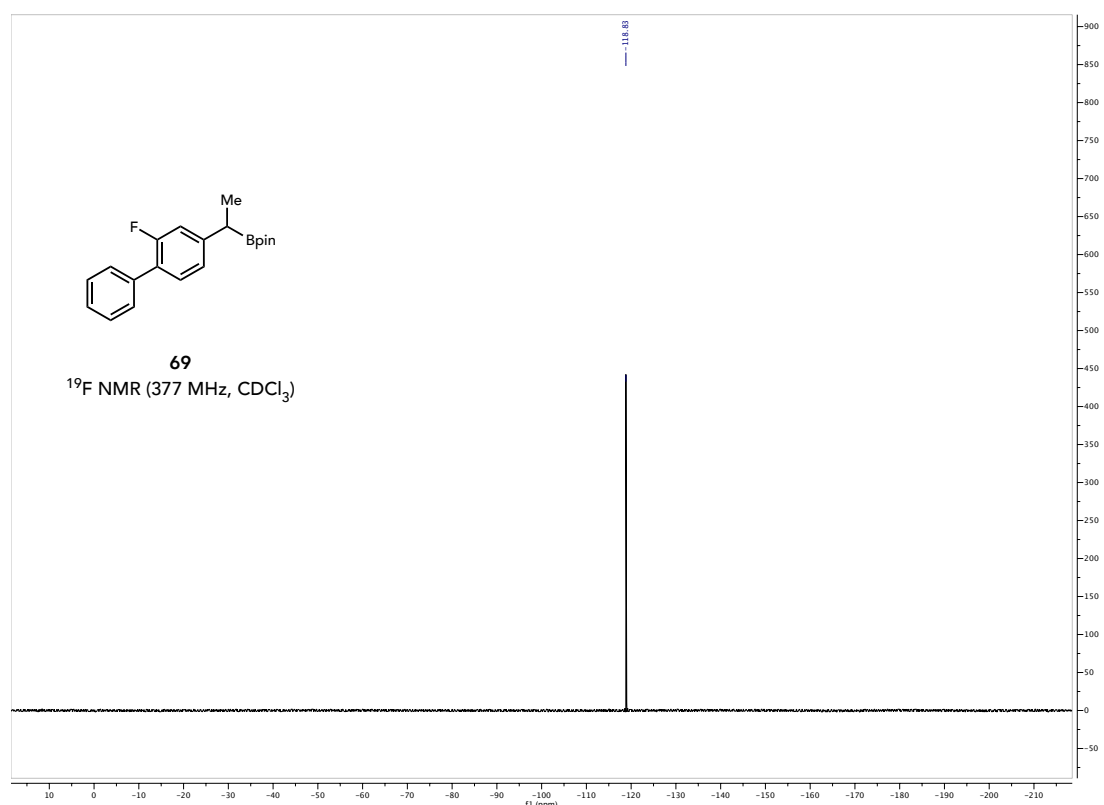

Figure S154. 377 MHz  $^{19}\text{F}$  NMR spectrum of **69** in  $\text{CDCl}_3$ .

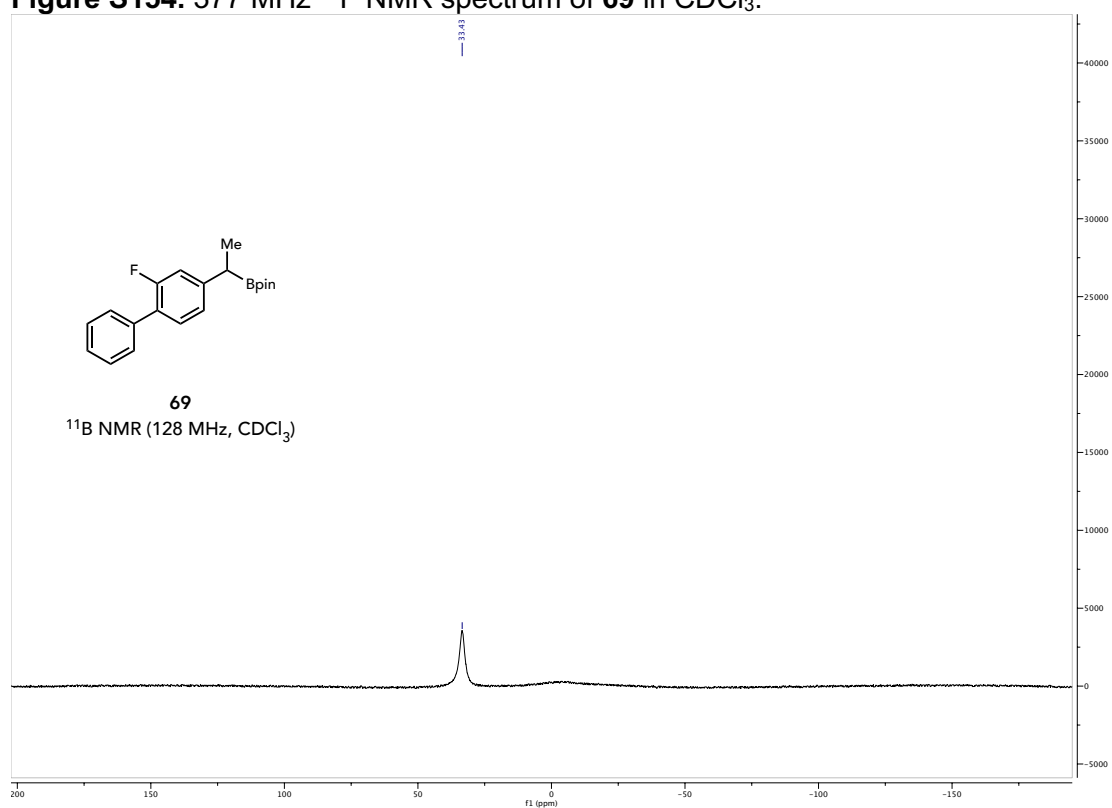

Figure S155. 128 MHz  $^{11}\text{B}$  NMR spectrum of **69** in  $\text{CDCl}_3$ .



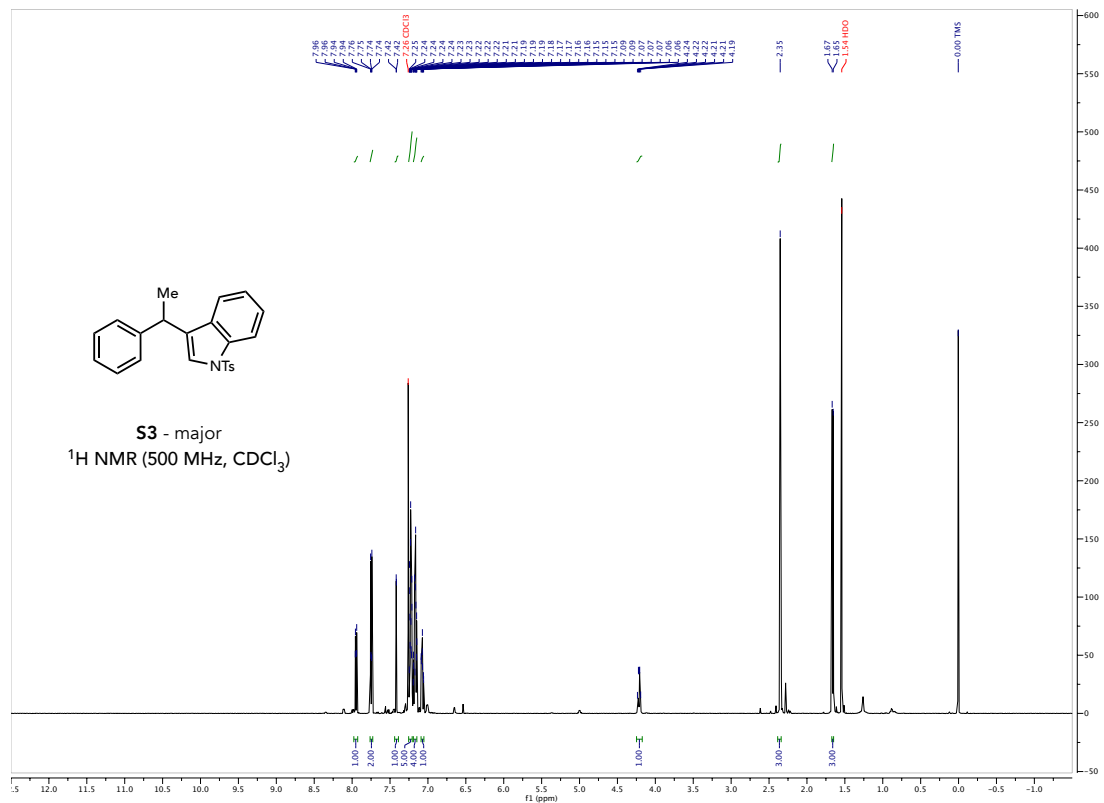

**Figure S158.** 500 MHz <sup>1</sup>H NMR spectrum of **S3** – major in CDCl<sub>3</sub>.

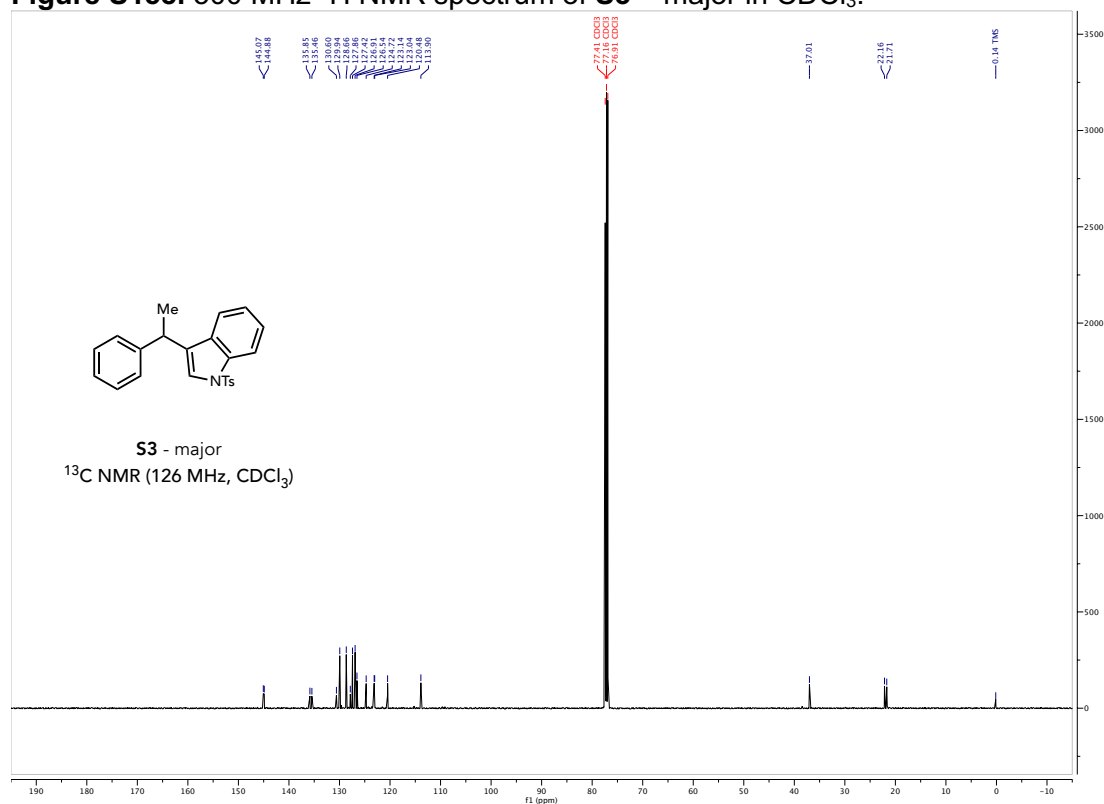

**Figure S159.** 126 MHz <sup>13</sup>C NMR spectrum of **S3** – major in CDCl<sub>3</sub>.





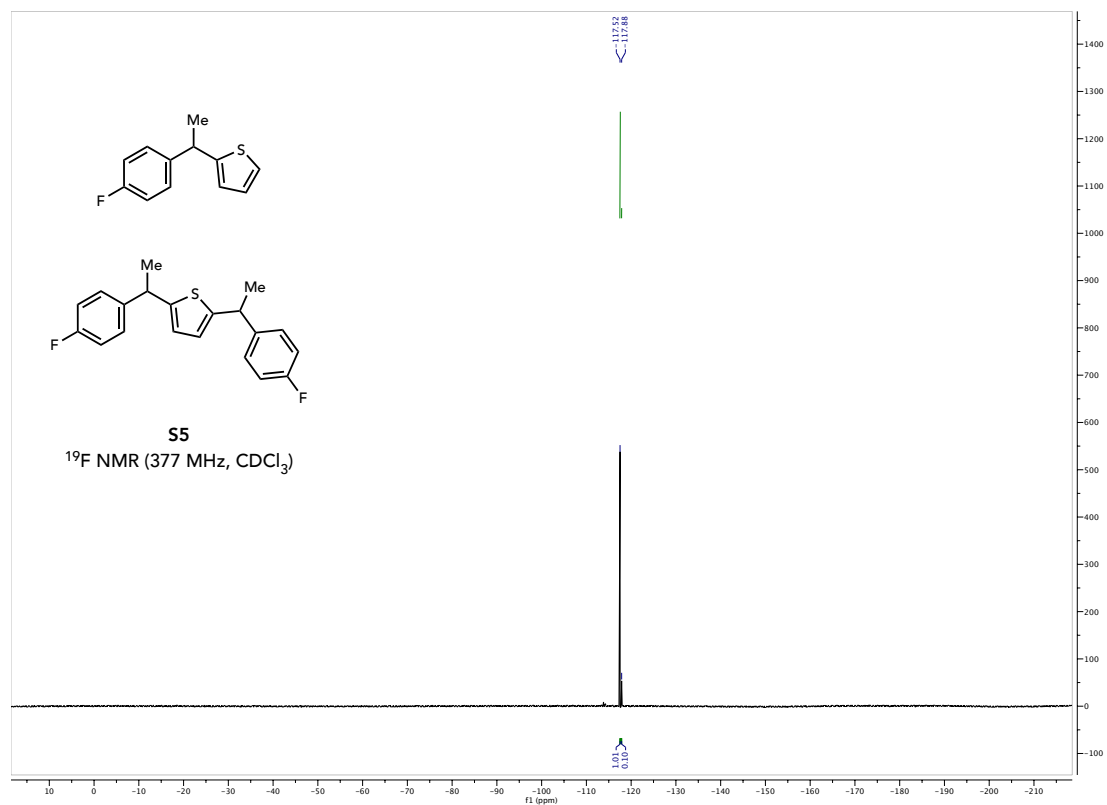

**Figure S164.** 377 MHz  $^{19}\text{F}$  NMR spectrum of **S5** in  $\text{CDCl}_3$ .







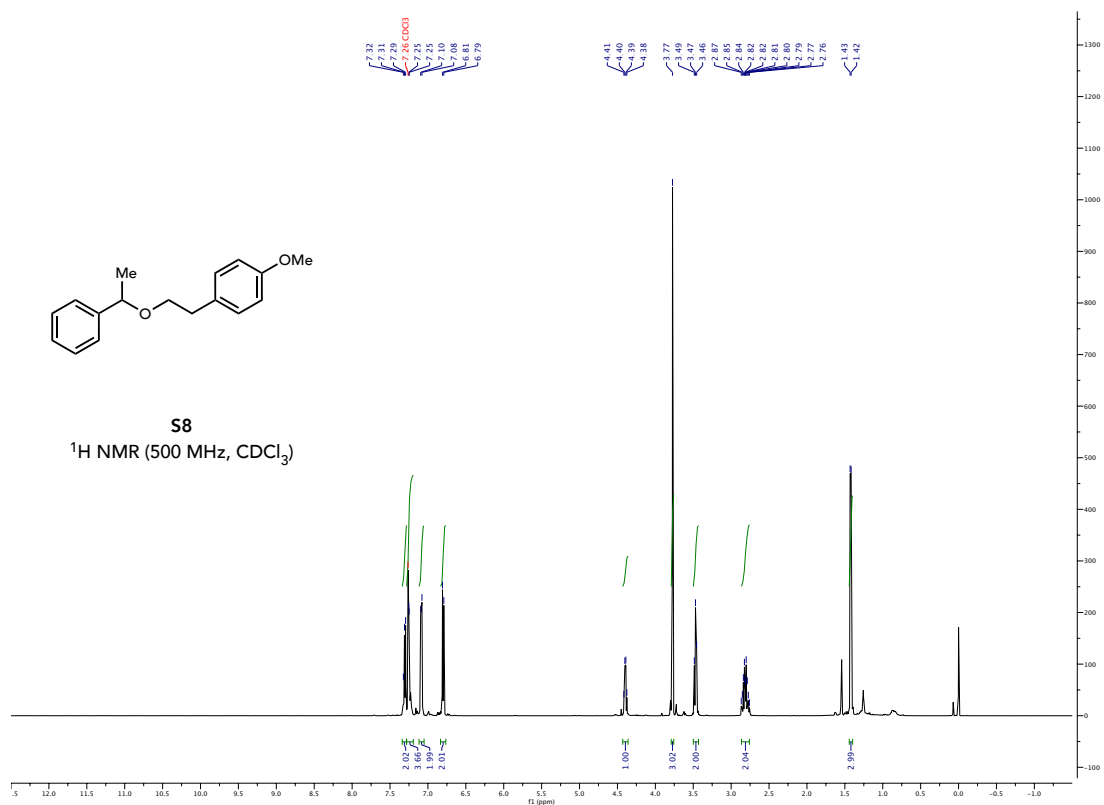

Figure S169. 500 MHz <sup>1</sup>H NMR spectrum of **S8** in CDCl<sub>3</sub>.

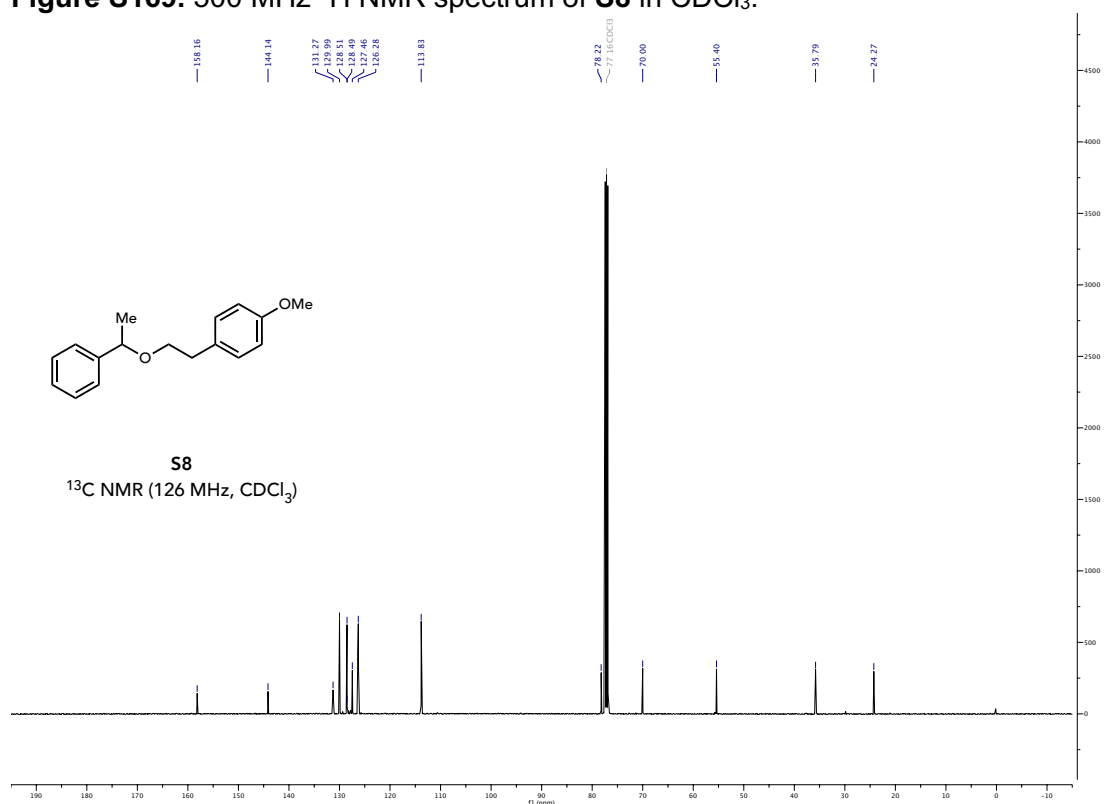

Figure S170. 126 MHz <sup>13</sup>C NMR spectrum of **S8** in CDCl<sub>3</sub>.

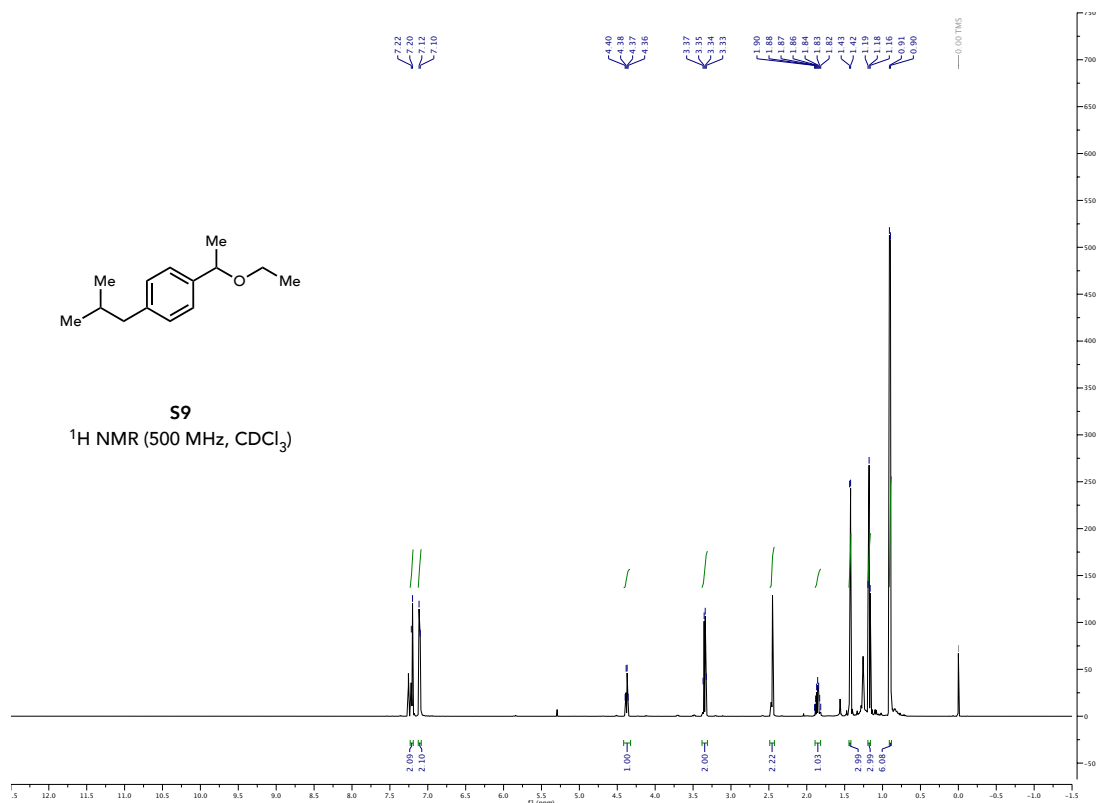

Figure S171. 500 MHz <sup>1</sup>H NMR spectrum of **S9** in CDCl<sub>3</sub>.

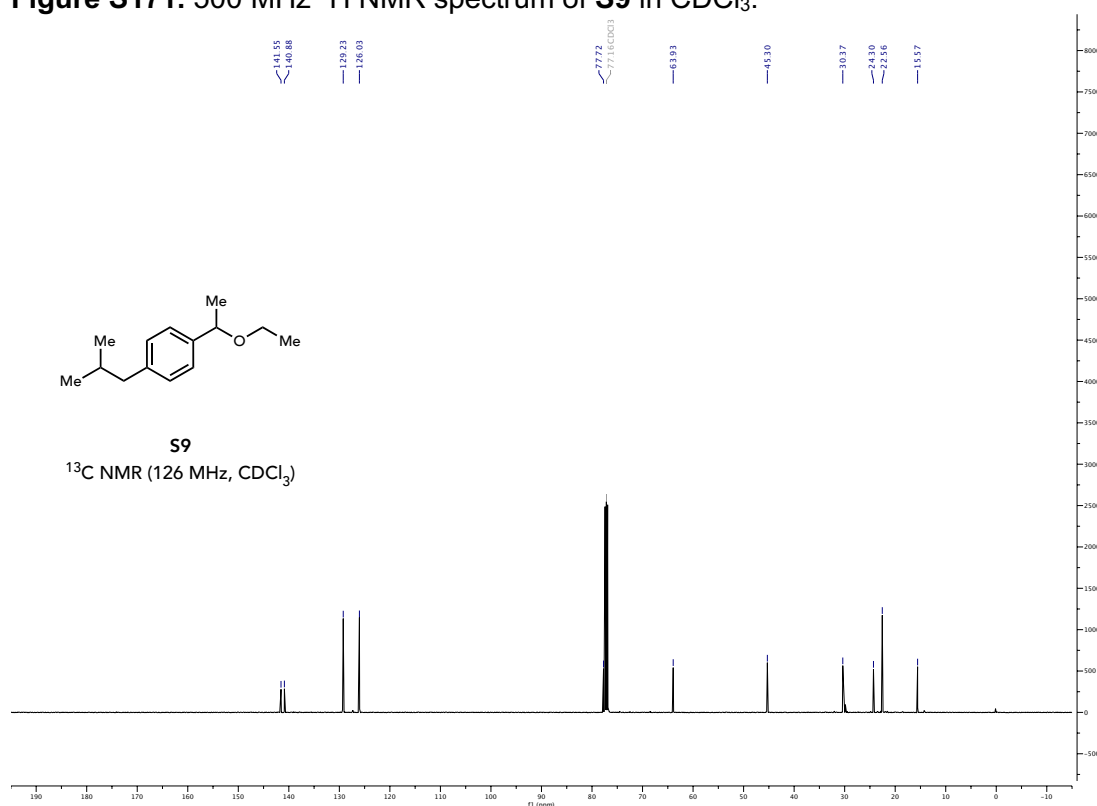

Figure S172. 126 MHz <sup>13</sup>C NMR spectrum of **S9** in CDCl<sub>3</sub>.





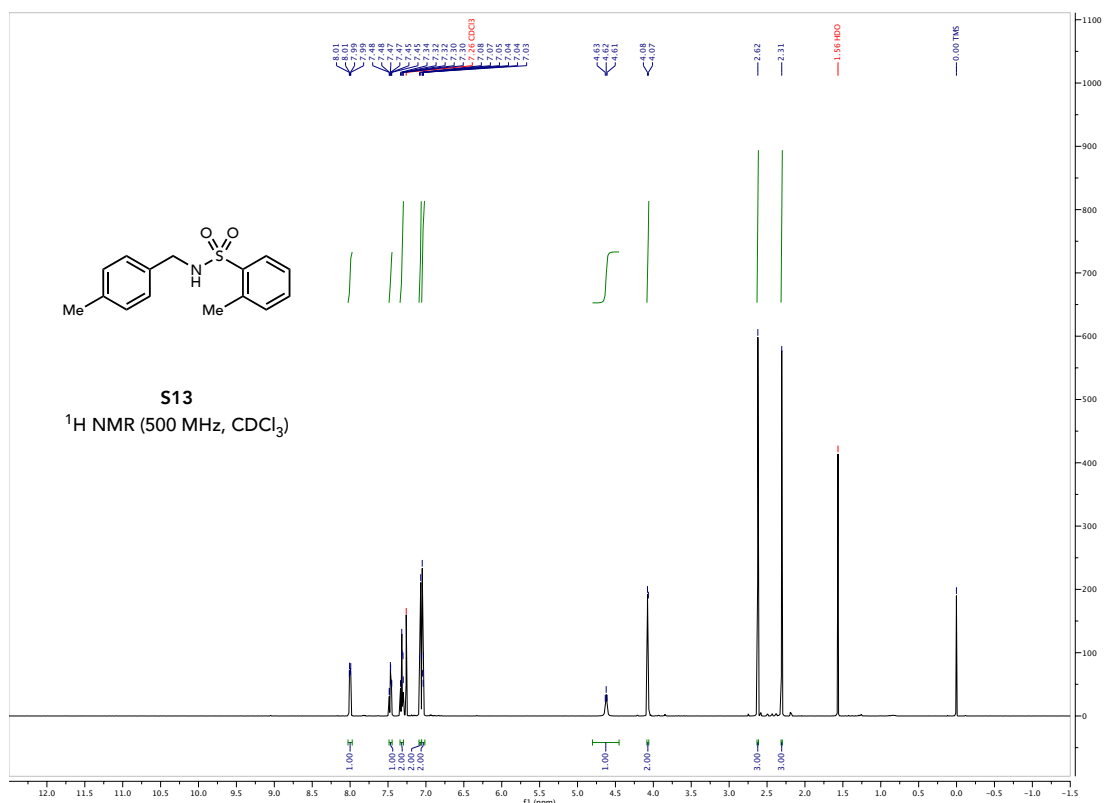

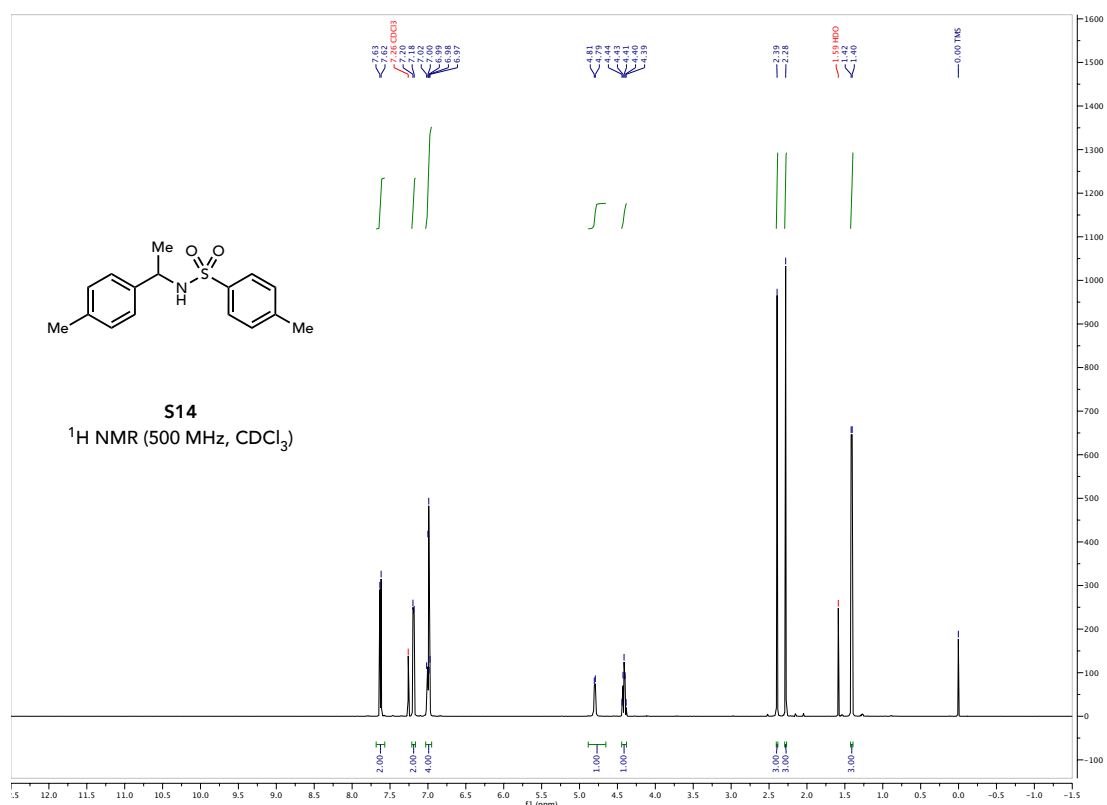

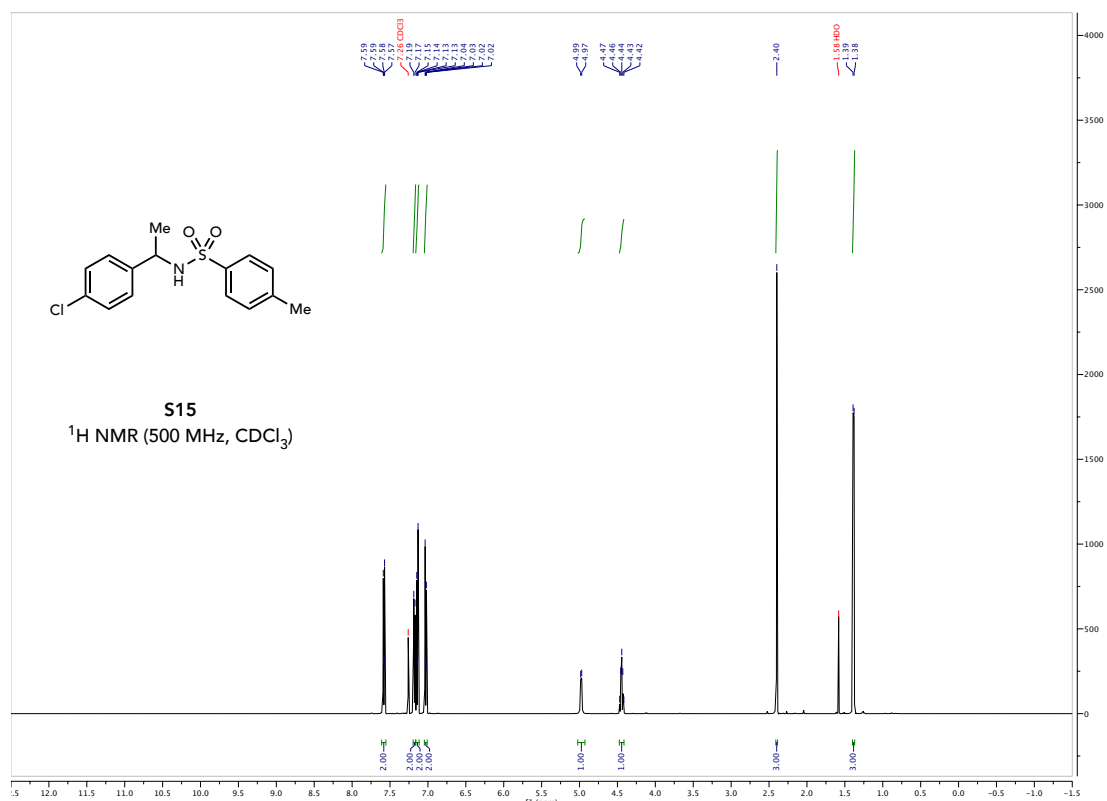

Figure S181. 500 MHz  $^1\text{H}$  NMR spectrum of **S15** in  $\text{CDCl}_3$ .

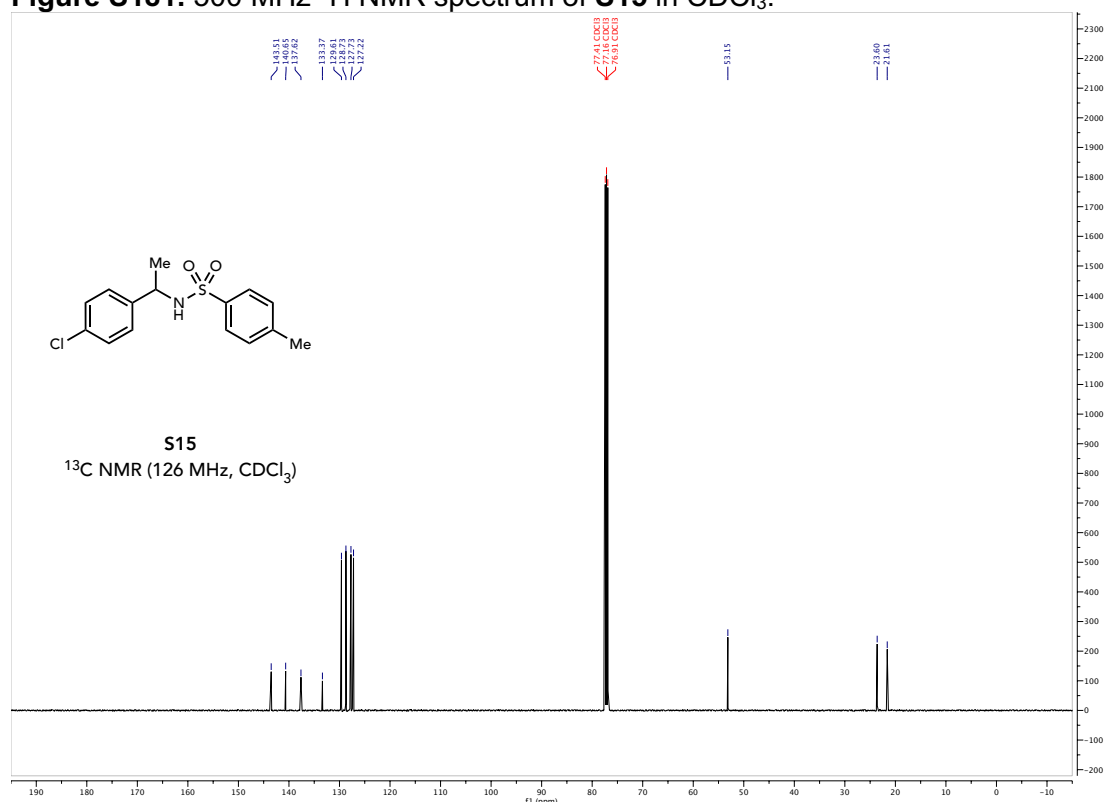

Figure S182. 126 MHz  $^{13}\text{C}$  NMR spectrum of **S15** in  $\text{CDCl}_3$ .





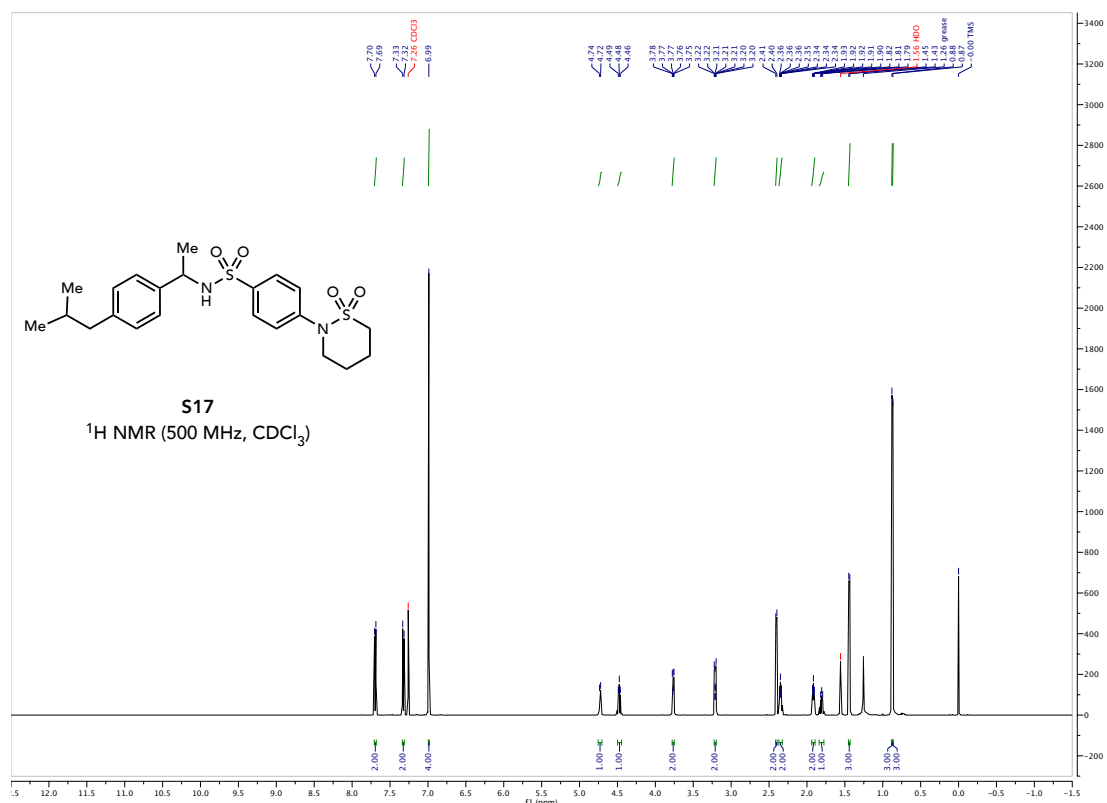

Figure S185. 500 MHz <sup>1</sup>H NMR spectrum of S17 in CDCl<sub>3</sub>.

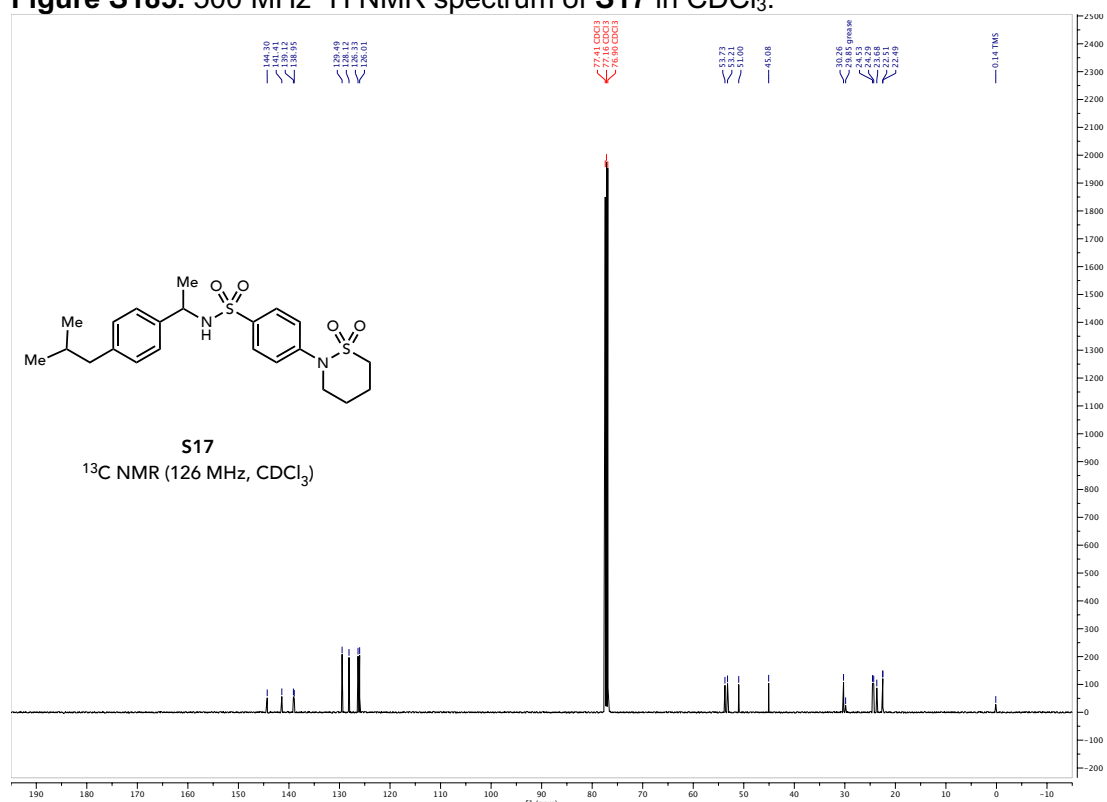

Figure S186. 126 MHz <sup>13</sup>C NMR spectrum of S17 in CDCl<sub>3</sub>.





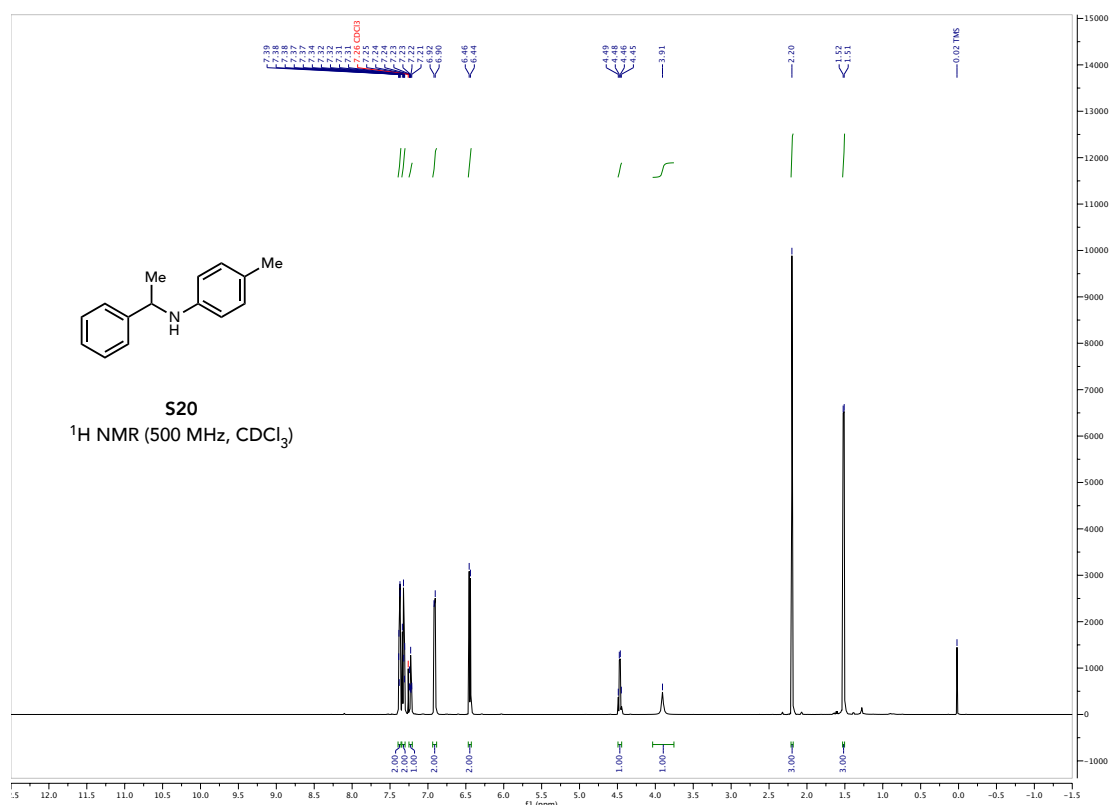

**Figure S191.** 500 MHz  $^1\text{H NMR}$  spectrum of **S20** in  $\text{CDCl}_3$ .

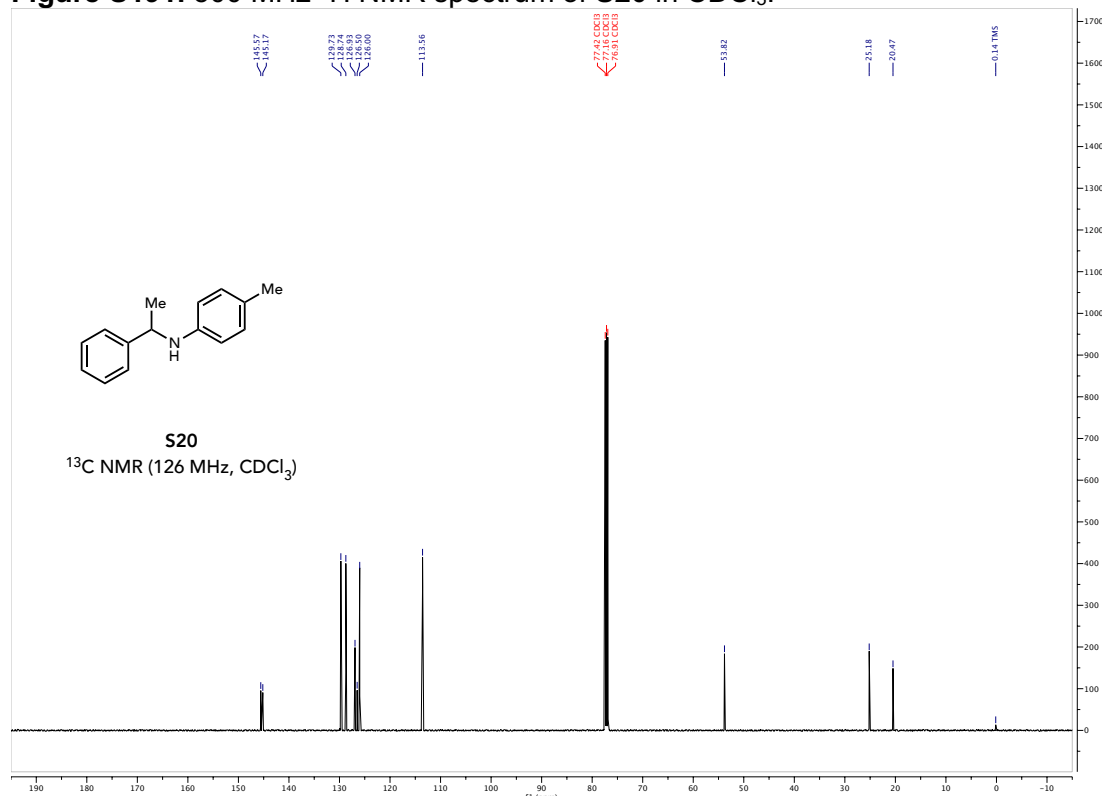

**Figure S192.** 126 MHz  $^{13}\text{C NMR}$  spectrum of **S20** in  $\text{CDCl}_3$ .
